# Supplementary material for: Historic photographs of glaciers and glacial landforms from the Ralph Stockman Tarr collection at Cornell University
Source: Copernicus journal article supplement (doi:10.5194/essd-12-771-2020), 2020-04-02
Supplement: Supplementary file 1 [file elliott_pritchard_ts01_v2a.xls]

## Sheet: Exported Records
SSID	ID Number	Label	Region	Sub-region	Glacier	Day	Month	Year	Topographic Map	Approximate Latitude (˚N)	Approximate Longitude (˚W)	Additional Notes	Media Type	URL
8548810	Box12_blank	[No label: Likely Looking down on Nunatak Fjord, near terminus of Nunatak Glacier from 1905 or 1906?]												https://digital.library.cornell.edu/catalog/ss:8548810
4057647	Box13BLANK_Between 443AND_530	[No label: Blank from Box 13 between 443 and 530]												https://digital.library.cornell.edu/catalog/ss:4057647
12619538	tve_exp1896_001	Composite	Greenland					1896					Film Negative	https://digital.library.cornell.edu/catalog/ss:12619538
12619539	tve_exp1896_002	Composite	Greenland					1896				Umanak fjord	Film Negative	https://digital.library.cornell.edu/catalog/ss:12619539
12619540	tve_exp1896_003	Composite	Greenland					1896				Umanak fjord	Film Negative	https://digital.library.cornell.edu/catalog/ss:12619540
12619541	tve_exp1896_004	Composite	Greenland					1896					Film Negative	https://digital.library.cornell.edu/catalog/ss:12619541
12619543	tve_exp1896_005	Iceberg	Greenland					1896				Greenland I 92	Film Negative	https://digital.library.cornell.edu/catalog/ss:12619543
12619544	tve_exp1896_006	Iceberg	Greenland					1896				Glacier 1235	Film Negative	https://digital.library.cornell.edu/catalog/ss:12619544
12619545	tve_exp1896_007	Iceberg	Greenland					1896				G 1263	Film Negative	https://digital.library.cornell.edu/catalog/ss:12619545
12619546	tve_exp1896_008	Iceberg	Greenland					1896					Film Negative	https://digital.library.cornell.edu/catalog/ss:12619546
12619547	tve_exp1896_009	Arctic sea ice, off Cumberland Sound, Baffin Land	Canada	Baffin Island				1896		-63.09	64.1322		Film Negative	https://digital.library.cornell.edu/catalog/ss:12619547
12619548	tve_exp1896_010	Sea ice, Baffin Land	Canada	Baffin Island				1896		-63.4817	66.1326		Film Negative	https://digital.library.cornell.edu/catalog/ss:12619548
12619549	tve_exp1896_011	Sea ice, Baffin Land	Canada	Baffin Island				1896		-63.4817	66.1326		Film Negative	https://digital.library.cornell.edu/catalog/ss:12619549
12619550	tve_exp1896_012	Sea ice, Baffin Land	Canada	Baffin Island				1896		-63.4817	66.1326		Film Negative	https://digital.library.cornell.edu/catalog/ss:12619550
12619551	tve_exp1896_013	Sea ice, Baffin Land	Canada	Baffin Island				1896		-63.4817	66.1326		Film Negative	https://digital.library.cornell.edu/catalog/ss:12619551
12619552	tve_exp1896_014	Baffin Land	Canada	Baffin Island				1896		-63.4817	66.1326		Film Negative	https://digital.library.cornell.edu/catalog/ss:12619552
12619553	tve_exp1896_015	Baffin Land	Canada	Baffin Island				1896		-63.4817	66.1326		Film Negative	https://digital.library.cornell.edu/catalog/ss:12619553
12619555	tve_exp1896_016	Baffin Land	Canada	Baffin Island				1882 (1896?)		-63.4817	66.1326	N America|1882 A Greenland	Film Negative	https://digital.library.cornell.edu/catalog/ss:12619555
12619556	tve_exp1896_017	At head of Cumberland Sound	Canada	Baffin Island				1882 (1896?)	NRC 26J	-66.5449	65.9556	N America|1882 A Greenland	Film Negative	https://digital.library.cornell.edu/catalog/ss:12619556
12619557	tve_exp1896_018	Head of Cumberland Sound	Canada	Baffin Island				1896	NRC 26J	-66.5449	65.9556	W6F1|weathering	Film Negative	https://digital.library.cornell.edu/catalog/ss:12619557
12619558	tve_exp1896_019	Head of Cumberland Sound	Canada	Baffin Island			9	1896	NRC 26J	-66.5449	65.9556	Greenland I 36	Film Negative	https://digital.library.cornell.edu/catalog/ss:12619558
12619559	tve_exp1896_020	Head of Cumberland Sound	Canada	Baffin Island			9	1896	NRC 26J	-66.5449	65.9556	O 459	Film Negative	https://digital.library.cornell.edu/catalog/ss:12619559
12619560	tve_exp1896_021	The ice floe at entrance of Cumberland Sound	Canada	Baffin Island			9	1896	NRC 26A/16D	-63.09	64.1322	Ocean 447A|Greenland II 48	Film Negative	https://digital.library.cornell.edu/catalog/ss:12619560
12619561	tve_exp1896_022	Floe ice off Cumberland Sound	Canada	Baffin Island			9	1896		-63.09	64.1322	Greenland I 97	Film Negative	https://digital.library.cornell.edu/catalog/ss:12619561
12619562	tve_exp1896_023	Ice floe off Cumberland Sound	Canada	Baffin Island			9	1896		-63.09	64.1322		Film Negative	https://digital.library.cornell.edu/catalog/ss:12619562
12619563	tve_exp1896_024	Cumberland Sound	Canada	Baffin Island				1896		-65.7546	65.1455		Film Negative	https://digital.library.cornell.edu/catalog/ss:12619563
12619564	tve_exp1896_025	Cumberland Sound	Canada	Baffin Island				1896		-65.7546	65.1455		Film Negative	https://digital.library.cornell.edu/catalog/ss:12619564
12619565	tve_exp1896_026	Cumberland Sound	Canada	Baffin Island				1896		-65.7546	65.1455		Film Negative	https://digital.library.cornell.edu/catalog/ss:12619565
12619566	tve_exp1896_027	Cumberland Sound	Canada	Baffin Island				1896		-65.7546	65.1455		Film Negative	https://digital.library.cornell.edu/catalog/ss:12619566
12619568	tve_exp1896_028	Cumberland Sound	Canada	Baffin Island				1896		-65.7546	65.1455	elevated beach	Film Negative	https://digital.library.cornell.edu/catalog/ss:12619568
12619569	tve_exp1896_029	Boulder bed, Cumberland sound	Canada	Baffin Island				1896		-65.7546	65.1455	White strait|a.1394	Film Negative	https://digital.library.cornell.edu/catalog/ss:12619569
12619570	tve_exp1896_030	Drowned coast	Canada	Baffin Island				1896				W677 Weathering|post glacine|weathering of gneiss	Film Negative	https://digital.library.cornell.edu/catalog/ss:12619570
12421581	tve_exp1896_031	Disintegration	Canada	Baffin Island								W674 Weathering|Prof. Barton	Film Negative	https://digital.library.cornell.edu/catalog/ss:12421581
12421582	tve_exp1896_032	Disintegration limestone, White strait	Canada	Baffin Island				1896					Film Negative	https://digital.library.cornell.edu/catalog/ss:12421582
12421583	tve_exp1896_033	Elevated beach	Canada	Baffin Island				1896				G 1261	Film Negative	https://digital.library.cornell.edu/catalog/ss:12421583
12421584	tve_exp1896_034	Iceberg	Canada	Baffin Island				1896				Greenland I 80	Film Negative	https://digital.library.cornell.edu/catalog/ss:12421584
12421585	tve_exp1896_035	Lake, Cumberland Sound	Canada	Baffin Island				1896		-65.7546	65.1455	Greenland I 30	Film Negative	https://digital.library.cornell.edu/catalog/ss:12421585
12421586	tve_exp1896_036	Temperature 32	Canada	Baffin Island				1896				N.A. 1900	Film Negative	https://digital.library.cornell.edu/catalog/ss:12421586
12421587	tve_exp1896_037	Esquimaux	Canada	Baffin Island				1896				N.A. 1906	Film Negative	https://digital.library.cornell.edu/catalog/ss:12421587
12421588	tve_exp1896_038	Esquimaux, Cumberland Sound	Canada	Baffin Island				1896		-65.7546	65.1455	Greenland I 30|temp 32-snowing	Film Negative	https://digital.library.cornell.edu/catalog/ss:12421588
12421589	tve_exp1896_039	Esquimaux woman and child	Canada	Baffin Island				1896				N.A. 1902	Film Negative	https://digital.library.cornell.edu/catalog/ss:12421589
12421590	tve_exp1896_040	Cumberland Sound Eskimo	Canada	Baffin Island				1902					Film Negative	https://digital.library.cornell.edu/catalog/ss:12421590
12421591	tve_exp1896_041	Composite, North Arm, Mt. Hope	Greenland	Nuussuaq Peninsula (Upernavik Archipelago)	Cornell Glacier			1896		-56.0062	74.2857	Contact of Mt. Hope|G 1130	Film Negative	https://digital.library.cornell.edu/catalog/ss:12421591
12421592	tve_exp1896_042	Moraine	Greenland	Nuussuaq Peninsula (Upernavik Archipelago)	Cornell Glacier			1896				G 1121	Film Negative	https://digital.library.cornell.edu/catalog/ss:12421592
12421593	tve_exp1896_043	Sandplain building at gut of ice tunnel in marginal lake	Greenland	Nuussuaq Peninsula (Upernavik Archipelago)	Cornell Glacier			1896				G 1127	Film Negative	https://digital.library.cornell.edu/catalog/ss:12421593
12421594	tve_exp1896_044	Delta in glacial lake	Greenland	Nuussuaq Peninsula (Upernavik Archipelago)	Cornell Glacier			1896					Film Negative	https://digital.library.cornell.edu/catalog/ss:12421594
12421595	tve_exp1896_045	Margin of Cornell Glacier [N.S. 1872]	Greenland	Nuussuaq Peninsula (Upernavik Archipelago)	Cornell Glacier			1896		-55.9697	74.2259	NS 1872	Film Negative	https://digital.library.cornell.edu/catalog/ss:12421595
12421596	tve_exp1896_046	Eskimo Cape York dogs on Hope [N.S. 1882]	Greenland	Nuussuaq Peninsula (Upernavik Archipelago)				1896				White Strait|N.S. 1882	Film Negative	https://digital.library.cornell.edu/catalog/ss:12421596
12421597	tve_exp1896_047	Hope aground, Mt. Schurman rising above fjord	Greenland	Nuussuaq Peninsula (Upernavik Archipelago)				1896		-56.0538	74.3718	Mt. Schurman rising above fjord|Greenland II 12	Film Negative	https://digital.library.cornell.edu/catalog/ss:12421597
12421598	tve_exp1896_048	South arm, Cornell Glacier from fjord	Greenland	Nuussuaq Peninsula (Upernavik Archipelago)	Cornell Glacier			1896		-55.9697	74.2259	Greenland II 13	Film Negative	https://digital.library.cornell.edu/catalog/ss:12421598
12421599	tve_exp1896_049	South arm of Cornell Glacier from fjord	Greenland	Nuussuaq Peninsula (Upernavik Archipelago)	Cornell Glacier			1896		-55.9697	74.2259	G 1112	Film Negative	https://digital.library.cornell.edu/catalog/ss:12421599
12421600	tve_exp1896_050	Marginal drainage between Mt. Hope and Cornell Glacier	Greenland	Nuussuaq Peninsula (Upernavik Archipelago)	Cornell Glacier			1896		-56.0062	74.2857	G 1108	Film Negative	https://digital.library.cornell.edu/catalog/ss:12421600
12421601	tve_exp1896_051	Glacial marginal lake back side of Mt. Hope	Greenland	Nuussuaq Peninsula (Upernavik Archipelago)	Cornell Glacier			1896		-56.0062	74.2857		Film Negative	https://digital.library.cornell.edu/catalog/ss:12421601
12421602	tve_exp1896_052	Glacial Lake Mt. Hope East side margin of Cornell Glacier	Greenland	Nuussuaq Peninsula (Upernavik Archipelago)	Cornell Glacier			1896		-56.0062	74.2857	G 1091	Film Negative	https://digital.library.cornell.edu/catalog/ss:12421602
12421603	tve_exp1896_053	Marginal falls, between North Cornell Glacier and Mt. Hope	Greenland	Nuussuaq Peninsula (Upernavik Archipelago)	Cornell Glacier			1896		-56.0062	74.2857	G 1061	Film Negative	https://digital.library.cornell.edu/catalog/ss:12421603
12421604	tve_exp1896_054	Arched ice over mountains	Greenland	Nuussuaq Peninsula (Upernavik Archipelago)	Cornell Glacier			1896				G 1027|Copy negative of this in Greenland album, von Engeln box 3	Film Negative	https://digital.library.cornell.edu/catalog/ss:12421604
12559112	tve_exp1896_055_02	Margin of Cornell Glacier	Greenland	Nuussuaq Peninsula (Upernavik Archipelago)	Cornell Glacier			1896		-55.9697	74.2259	G 1025|copy negative of this in Greenalnd album, von Engeln box 3	Film Negative	https://digital.library.cornell.edu/catalog/ss:12559112
12421605	tve_exp1896_055	Margin of Cornell Glacier	Greenland	Nuussuaq Peninsula (Upernavik Archipelago)	Cornell Glacier			1896		-55.9697	74.2259	G 1025|copy negative of this in Greenalnd album, von Engeln box 3	Film Negative	https://digital.library.cornell.edu/catalog/ss:12421605
12421606	tve_exp1896_056	Moraine and margin of Cornell Glacier, base of upper Nugsuak peninsula	Greenland	Nuussuaq Peninsula (Upernavik Archipelago)	Cornell Glacier			1896		-55.9697	74.2259	G 1019	Film Negative	https://digital.library.cornell.edu/catalog/ss:12421606
12421607	tve_exp1896_057	Edged land margin of Cornell Glacier, ice on right	Greenland	Nuussuaq Peninsula (Upernavik Archipelago)	Cornell Glacier			1896		-55.9697	74.2259	Glaciers 1017	Film Negative	https://digital.library.cornell.edu/catalog/ss:12421607
12421608	tve_exp1896_058	Greenland moraine	Greenland	Nuussuaq Peninsula (Upernavik Archipelago)								G 1015	Film Negative	https://digital.library.cornell.edu/catalog/ss:12421608
12421609	tve_exp1896_059	Margin of Cornell Glacier	Greenland	Nuussuaq Peninsula (Upernavik Archipelago)	Cornell Glacier			1896		-55.9697	74.2259	G 1007	Film Negative	https://digital.library.cornell.edu/catalog/ss:12421609
12421610	tve_exp1896_060	Surface of Cornell Glacier from land	Greenland	Nuussuaq Peninsula (Upernavik Archipelago)	Cornell Glacier			1896		-55.9697	74.2259	G 1005	Film Negative	https://digital.library.cornell.edu/catalog/ss:12421610
12421611	tve_exp1896_061	Delta in marginal lake	Greenland	Nuussuaq Peninsula (Upernavik Archipelago)	Cornell Glacier			1896				G 1001|Mt. Hope (east side)	Film Negative	https://digital.library.cornell.edu/catalog/ss:12421611
12559117	tve_exp1896_062_02	Bordering of ice on shore of marginal lake	Greenland	Nuussuaq Peninsula (Upernavik Archipelago)	Cornell Glacier			1896				G 962|Bousted on right	Film Negative	https://digital.library.cornell.edu/catalog/ss:12559117
12421612	tve_exp1896_062	Bordering of ice on shore of marginal lake	Greenland	Nuussuaq Peninsula (Upernavik Archipelago)	Cornell Glacier			1896				G 962|Bousted on right	Film Negative	https://digital.library.cornell.edu/catalog/ss:12421612
12421613	tve_exp1896_063	Boulders at base of small glacier, northside of upper Nugsuak peninsula	Greenland	Nuussuaq Peninsula (Upernavik Archipelago)	Cornell Glacier			1896		-56.9146	74.1521	G 920	Film Negative	https://digital.library.cornell.edu/catalog/ss:12421613
12421614	tve_exp1896_064	Margin of Cornell Glacier	Greenland	Nuussuaq Peninsula (Upernavik Archipelago)	Cornell Glacier			1896		-55.9697	74.2259	G 912	Film Negative	https://digital.library.cornell.edu/catalog/ss:12421614
12421615	tve_exp1896_065	Ice surface, contact of Cornell Glacier, and Mt. Hope	Greenland	Nuussuaq Peninsula (Upernavik Archipelago)	Cornell Glacier			1896		-56.0062	74.2857	G 910|north end	Film Negative	https://digital.library.cornell.edu/catalog/ss:12421615
12421616	tve_exp1896_066	Rough ice surface	Greenland	Nuussuaq Peninsula (Upernavik Archipelago)	Cornell Glacier			1896					Film Negative	https://digital.library.cornell.edu/catalog/ss:12421616
12421617	tve_exp1896_067	Surface	Greenland	Nuussuaq Peninsula (Upernavik Archipelago)	Cornell Glacier			1896				G 897	Film Negative	https://digital.library.cornell.edu/catalog/ss:12421617
12559122	tve_exp1896_068_02	Wyckoff glacier from north edge of Cornell Glacier	Greenland	Nuussuaq Peninsula (Upernavik Archipelago)	Wyckoff Glacier			1896				G 889	Film Negative	https://digital.library.cornell.edu/catalog/ss:12559122
12421618	tve_exp1896_068	Wyckoff glacier from north edge of Cornell Glacier	Greenland	Nuussuaq Peninsula (Upernavik Archipelago)	Wyckoff			1896				G 889	Film Negative	https://digital.library.cornell.edu/catalog/ss:12421618
12421619	tve_exp1896_069	Nunatak separating Cornell Glacier from Wyckoff Glacier	Greenland	Nuussuaq Peninsula (Upernavik Archipelago)	Wyckoff Glacier|Cornell Glacier			1896				G 884	Film Negative	https://digital.library.cornell.edu/catalog/ss:12421619
12559124	tve_exp1896_070_02	Mt. Schurman, from Mt. Hope.	Greenland	Nuussuaq Peninsula (Upernavik Archipelago)	Cornell Glacier			1896		-56.0538	74.3718	Greenland II 3	Film Negative	https://digital.library.cornell.edu/catalog/ss:12559124
12421620	tve_exp1896_070	Mt. Schurman, from Mt. Hope.	Greenland	Nuussuaq Peninsula (Upernavik Archipelago)	Cornell Glacier			1896		-56.0538	74.3718	Greenland II 3	Film Negative	https://digital.library.cornell.edu/catalog/ss:12421620
12421621	tve_exp1896_071	Moraine along edge of north end of Cornell Glacier	Greenland	Nuussuaq Peninsula (Upernavik Archipelago)	Cornell Glacier			1896		-55.9697	74.2259	Glaciers	Film Negative	https://digital.library.cornell.edu/catalog/ss:12421621
12421622	tve_exp1896_072	Margin of Cornell Glacier	Greenland	Nuussuaq Peninsula (Upernavik Archipelago)	Cornell Glacier			1896		-55.9697	74.2259	G 1141	Film Negative	https://digital.library.cornell.edu/catalog/ss:12421622
12421623	tve_exp1896_073	Moraine, Mt. Schurman	Greenland	Nuussuaq Peninsula (Upernavik Archipelago)	Cornell Glacier			1896		-56.0538	74.3718	G 1151	Film Negative	https://digital.library.cornell.edu/catalog/ss:12421623
12421624	tve_exp1896_074	Moraine	Greenland	Nuussuaq Peninsula (Upernavik Archipelago)	Cornell Glacier			1896				G 1153	Film Negative	https://digital.library.cornell.edu/catalog/ss:12421624
12559129	tve_exp1896_076_02	Ice cap Disko Island	Greenland	Uummannaq Fjord				1896		-52.7698	69.6687	Greenland II 93	Film Negative	https://digital.library.cornell.edu/catalog/ss:12559129
12421626	tve_exp1896_076	Ice cap Disko Island	Greenland	Uummannaq Fjord				1896		-52.7698	69.6687	Greenland II 93	Film Negative	https://digital.library.cornell.edu/catalog/ss:12421626
12421627	tve_exp1896_077	Ice cap Disko Island	Greenland	Uummannaq Fjord				1896		-52.7698	69.6687	Greenland II 95	Film Negative	https://digital.library.cornell.edu/catalog/ss:12421627
12559131	tve_exp1896_078_02	Ice cap Disko Island	Greenland	Uummannaq Fjord				1896		-52.7698	69.6687	Greenland II 95	Film Negative	https://digital.library.cornell.edu/catalog/ss:12559131
12421628	tve_exp1896_078	Ice cap Disko Island	Greenland	Uummannaq Fjord				1896		-52.7698	69.6687	Greenland II 95	Film Negative	https://digital.library.cornell.edu/catalog/ss:12421628
12421629	tve_exp1896_079	Ice cap Disko Island	Greenland	Uummannaq Fjord				1896		-52.7698	69.6687		Film Negative	https://digital.library.cornell.edu/catalog/ss:12421629
12421630	tve_exp1896_080	Ice cap Disko Island	Greenland	Uummannaq Fjord				1896		-52.7698	69.6687	Glaciers 1365	Film Negative	https://digital.library.cornell.edu/catalog/ss:12421630
12421631	tve_exp1896_081	Ice cap Disko Island	Greenland	Uummannaq Fjord				1896		-52.7698	69.6687	G 1360	Film Negative	https://digital.library.cornell.edu/catalog/ss:12421631
12421632	tve_exp1896_082	Iceberg off Duck Islands	Greenland	Nuussuaq Peninsula (Upernavik Archipelago)				1896		-57.8105	74.0274	G 1290|Copy negative of this in greenland album, von Engeln box 3	Film Negative	https://digital.library.cornell.edu/catalog/ss:12421632
12421645	tve_exp1896_095	The ice cap of Disko Island, north of Godhavn	Greenland	Uummannaq Fjord				1896		-52.7698	69.6687	Greenland I 67	Film Negative	https://digital.library.cornell.edu/catalog/ss:12421645
12421648	tve_exp1896_098	On the harbor of Godhavn	Greenland	Uummannaq Fjord				1896		-52.7698	69.6687	Greenland II 118	Film Negative	https://digital.library.cornell.edu/catalog/ss:12421648
12421649	tve_exp1896_099	Ice tongue in valley of Mt. Hope, going back against ice movement	Greenland	Nuussuaq Peninsula (Upernavik Archipelago)				1896		-56.0062	74.2857	G 1115	Film Negative	https://digital.library.cornell.edu/catalog/ss:12421649
12421654	tve_exp1896_104	Boulder stream glaciated surface, base of Nugsuak peninsula	Greenland	Nuussuaq Peninsula (Upernavik Archipelago)				1896		-56.9146	74.1521	Greenland I, 27	Film Negative	https://digital.library.cornell.edu/catalog/ss:12421654
12421655	tve_exp1896_105	Rock basin lake, Nugsuak peninsula	Greenland	Nuussuaq Peninsula (Upernavik Archipelago)				1896		-56.9146	74.1521	Greenland I 34	Film Negative	https://digital.library.cornell.edu/catalog/ss:12421655
12421656	tve_exp1896_106	Unnamed lake, Nugsuak peninsula	Greenland	Nuussuaq Peninsula (Upernavik Archipelago)				1896		-56.9146	74.1521	Greenland I 35	Film Negative	https://digital.library.cornell.edu/catalog/ss:12421656
12421657	tve_exp1896_107	Lake, upper Nugsuak Peninsula	Greenland	Nuussuaq Peninsula (Upernavik Archipelago)				1896		-56.9146	74.1521	Greenland I 48	Film Negative	https://digital.library.cornell.edu/catalog/ss:12421657
12421658	tve_exp1896_108	Fog in valleys, base of Upper Nugsuak Peninsula	Greenland	Nuussuaq Peninsula (Upernavik Archipelago)				1896		-56.9146	74.1521	Greenland I 51	Film Negative	https://digital.library.cornell.edu/catalog/ss:12421658
12421659	tve_exp1896_109	Delta in marginal lake at base of Upper Nugsuak Peninsula	Greenland	Nuussuaq Peninsula (Upernavik Archipelago)				1896		-56.9146	74.1521	G 1128	Film Negative	https://digital.library.cornell.edu/catalog/ss:12421659
12421660	tve_exp1896_110	Topography, Nugsuak Pen. and Devil's Thumb	Greenland	Nuussuaq Peninsula (Upernavik Archipelago)				1896		-56.9146	74.1521		Film Negative	https://digital.library.cornell.edu/catalog/ss:12421660
12421661	tve_exp1896_111	Devil's Thumb from Mt. Hope, north arm of Cornell Glacier between Mt. Hope and Nugsuak Peninsula	Greenland	Nuussuaq Peninsula (Upernavik Archipelago)	Cornell Glacier			1896		-56.4598	74.31	Greenland II 2	Film Negative	https://digital.library.cornell.edu/catalog/ss:12421661
12421662	tve_exp1896_112	Ice base	Greenland	Nuussuaq Peninsula (Upernavik Archipelago)				1896					Film Negative	https://digital.library.cornell.edu/catalog/ss:12421662
12421663	tve_exp1896_113	Camp M. I, Upper Nugssuak Peninsula	Greenland	Nuussuaq Peninsula (Upernavik Archipelago)				1896		-56.9146	74.1521	N. America, 1736 A Greenland	Film Negative	https://digital.library.cornell.edu/catalog/ss:12421663
12421664	tve_exp1896_114	Wilcox Head	Greenland	Nuussuaq Peninsula (Upernavik Archipelago)				1896		-57.2843	74.1041	Greenland I 70	Film Negative	https://digital.library.cornell.edu/catalog/ss:12421664
12421665	tve_exp1896_115	Rock basin lake, upper Nugsuak Peninsula	Greenland	Nuussuaq Peninsula (Upernavik Archipelago)				1896		-56.9146	74.1521	Greenland I 81	Film Negative	https://digital.library.cornell.edu/catalog/ss:12421665
12421666	tve_exp1896_116	Lake in interior of upper Nugsuak Peninsula	Greenland	Nuussuaq Peninsula (Upernavik Archipelago)				1896		-56.9146	74.1521	Greenland I 132	Film Negative	https://digital.library.cornell.edu/catalog/ss:12421666
12559144	tve_exp1896_117_02	Edge of ice cap, base of Upper Nugssuak Peninsula	Greenland	Nuussuaq Peninsula (Upernavik Archipelago)				1896		-56.9146	74.1521	Greenland II 4	Film Negative	https://digital.library.cornell.edu/catalog/ss:12559144
12421667	tve_exp1896_117	Edge of ice cap, base of Upper Nugssuak Peninsula	Greenland	Nuussuaq Peninsula (Upernavik Archipelago)				1896		-56.9146	74.1521	Greenland II 4	Film Negative	https://digital.library.cornell.edu/catalog/ss:12421667
12421668	tve_exp1896_118	Base of small glacier, north side of Upper Nugssuak Peninsula	Greenland	Nuussuaq Peninsula (Upernavik Archipelago)				1896		-56.9146	74.1521	Greenland II 22|"Pete" in foreground	Film Negative	https://digital.library.cornell.edu/catalog/ss:12421668
12421669	tve_exp1896_119	Eskimo graves, on Wilcox head, Upper Nugssuak Peninsula	Greenland	Nuussuaq Peninsula (Upernavik Archipelago)				1896		-56.9146	74.1521	Greenland II 27	Film Negative	https://digital.library.cornell.edu/catalog/ss:12421669
12421670	tve_exp1896_120	Dikes	Greenland	Nuussuaq Peninsula (Upernavik Archipelago)				1896				Greenland II 43	Film Negative	https://digital.library.cornell.edu/catalog/ss:12421670
12421671	tve_exp1896_121	Overturned fold, Upper Nugssuak Peninsula	Greenland	Nuussuaq Peninsula (Upernavik Archipelago)				1896		-56.9146	74.1521	Greenland II 40	Film Negative	https://digital.library.cornell.edu/catalog/ss:12421671
12421672	tve_exp1896_122	Lake in interior of Upper Nugssuak Peninsula	Greenland	Nuussuaq Peninsula (Upernavik Archipelago)				1896		-56.9146	74.1521	Greenland II 67	Film Negative	https://digital.library.cornell.edu/catalog/ss:12421672
12421673	tve_exp1896_123	Lake on Upper Nugssuak Peninsula	Greenland	Nuussuaq Peninsula (Upernavik Archipelago)				1896		-56.9146	74.1521	Greenland II 86	Film Negative	https://digital.library.cornell.edu/catalog/ss:12421673
12421674	tve_exp1896_124	Ice margin and pond, Mt. Hope, Upper Nugssuak Peninsula	Greenland	Nuussuaq Peninsula (Upernavik Archipelago)				1896		-56.0062	74.2857	G1111	Film Negative	https://digital.library.cornell.edu/catalog/ss:12421674
12421675	tve_exp1896_125	Abandoned moraine near north arm of Cornell Glacier at base of Nugssuak Peninsula	Greenland	Nuussuaq Peninsula (Upernavik Archipelago)	Cornell Glacier			1896		-55.9697	74.2259	G 1109	Film Negative	https://digital.library.cornell.edu/catalog/ss:12421675
12421676	tve_exp1896_126	Icebergs, Upper Nugssuak Peninsula	Greenland	Nuussuaq Peninsula (Upernavik Archipelago)				1896		-55.9697	74.2259	Glaciers|1241 B. Greenland	Film Negative	https://digital.library.cornell.edu/catalog/ss:12421676
12421677	tve_exp1896_127	Delta at head of Hope harbor	Greenland	Nuussuaq Peninsula (Upernavik Archipelago)				1896				NA 1730	Film Negative	https://digital.library.cornell.edu/catalog/ss:12421677
12421678	tve_exp1896_128	Nugsuak Peninsula	Greenland	Nuussuaq Peninsula (Upernavik Archipelago)				1896		-56.9146	74.1521		Film Negative	https://digital.library.cornell.edu/catalog/ss:12421678
12421679	tve_exp1896_129	Nugsuak Peninsula	Greenland	Nuussuaq Peninsula (Upernavik Archipelago)				1896		-56.9146	74.1521		Film Negative	https://digital.library.cornell.edu/catalog/ss:12421679
12421680	tve_exp1896_130	Nugsuak Peninsula	Greenland	Nuussuaq Peninsula (Upernavik Archipelago)				1896		-56.9146	74.1521		Film Negative	https://digital.library.cornell.edu/catalog/ss:12421680
12421681	tve_exp1896_131	Nugsuak Peninsula	Greenland	Nuussuaq Peninsula (Upernavik Archipelago)				1896		-56.9146	74.1521		Film Negative	https://digital.library.cornell.edu/catalog/ss:12421681
12421682	tve_exp1896_132	Nugsuak Peninsula	Greenland	Nuussuaq Peninsula (Upernavik Archipelago)				1896		-56.9146	74.1521		Film Negative	https://digital.library.cornell.edu/catalog/ss:12421682
12421683	tve_exp1896_133	Nugsuak Peninsula	Greenland	Nuussuaq Peninsula (Upernavik Archipelago)				1896		-56.9146	74.1521		Film Negative	https://digital.library.cornell.edu/catalog/ss:12421683
12421684	tve_exp1896_134	Nugsuak Peninsula	Greenland	Nuussuaq Peninsula (Upernavik Archipelago)				1896		-56.9146	74.1521		Film Negative	https://digital.library.cornell.edu/catalog/ss:12421684
12421685	tve_exp1896_135	Arched iceberg off Wilcox Head, Upper Nugsuak peninsula	Greenland	Nuussuaq Peninsula (Upernavik Archipelago)				1896		-57.2843	74.1041	G 1292/1294	Film Negative	https://digital.library.cornell.edu/catalog/ss:12421685
12559156	tve_exp1896_135b	Arched iceberg off Wilcox Head, Upper Nugsuak peninsula	Greenland	Nuussuaq Peninsula (Upernavik Archipelago)				1896		-57.2843	74.1041	G 1292/1294	Film Negative	https://digital.library.cornell.edu/catalog/ss:12559156
12421686	tve_exp1896_136	Iceberg off coast of Upper Nugssuak Peninsula	Greenland	Nuussuaq Peninsula (Upernavik Archipelago)				1896		-56.9146	74.1521	G 1292	Film Negative	https://digital.library.cornell.edu/catalog/ss:12421686
12421687	tve_exp1896_137	Small glacier in middle of Upper Nugssuak Peninsula	Greenland	Nuussuaq Peninsula (Upernavik Archipelago)				1896		-56.9146	74.1521		Film Negative	https://digital.library.cornell.edu/catalog/ss:12421687
12421688	tve_exp1896_138	Dying glacier, interior of Upper Nugssuak Peninsula	Greenland	Nuussuaq Peninsula (Upernavik Archipelago)				1896		-56.9146	74.1521	G 1328	Film Negative	https://digital.library.cornell.edu/catalog/ss:12421688
12421689	tve_exp1896_139	Moraine on edge small tidewater glacier on north side of Upper Nugssuak Peninsula	Greenland	Nuussuaq Peninsula (Upernavik Archipelago)				1896		-56.9146	74.1521	G 1331	Film Negative	https://digital.library.cornell.edu/catalog/ss:12421689
12421690	tve_exp1896_140	Nugsuak glacier with debris covered land, Upper Nugssuak Peninsula	Greenland	Nuussuaq Peninsula (Upernavik Archipelago)	Nugsuak Glacier			1896		-56.9146	74.1521	G 1833	Film Negative	https://digital.library.cornell.edu/catalog/ss:12421690
12421691	tve_exp1896_141	Dike valley Upper Nugssuak Peninsula	Greenland	Nuussuaq Peninsula (Upernavik Archipelago)				1896		-56.9146	74.1521	G 1434|ice cap in background	Film Negative	https://digital.library.cornell.edu/catalog/ss:12421691
12421692	tve_exp1896_142	Glacial boulder, base 2, Upper Nugssuak Peninsula	Greenland	Nuussuaq Peninsula (Upernavik Archipelago)				1896		-56.9146	74.1521	G 1440|Copy negative of this in greenland album, von Engeln box 3	Film Negative	https://digital.library.cornell.edu/catalog/ss:12421692
12421693	tve_exp1896_143	Nugsuak glacier end, north side of Upper Nugssuak Peninsula	Greenland	Nuussuaq Peninsula (Upernavik Archipelago)	Nugsuak Glacier			1896		-56.9146	74.1521	G 958	Film Negative	https://digital.library.cornell.edu/catalog/ss:12421693
12421694	tve_exp1896_144	Boulders in end of Nugssuak glacier, Upper Nugssuak Peninsula	Greenland	Nuussuaq Peninsula (Upernavik Archipelago)	Nugsuak Glacier			1896		-56.9146	74.1521	G 960	Film Negative	https://digital.library.cornell.edu/catalog/ss:12421694
12421695	tve_exp1896_145	North side, Upper Nugssuak Peninsula	Greenland	Nuussuaq Peninsula (Upernavik Archipelago)				1897		-56.9146	74.1521	Glaciers 957	Film Negative	https://digital.library.cornell.edu/catalog/ss:12421695
12421696	tve_exp1896_146	Tidewater end of small glacier on North side of Upper Nugssuak Peninsula	Greenland	Nuussuaq Peninsula (Upernavik Archipelago)				1896		-56.9146	74.1521		Film Negative	https://digital.library.cornell.edu/catalog/ss:12421696
12421697	tve_exp1896_147	End of Nugsuak glacier (tidewater) Upper Nugssuak Peninsula	Greenland	Nuussuaq Peninsula (Upernavik Archipelago)	Nugsuak Glacier			1896		-56.9146	74.1521	G 958	Film Negative	https://digital.library.cornell.edu/catalog/ss:12421697
12421698	tve_exp1896_148	Margin of small glacier on north side of Upper Nugssuak Peninsula	Greenland	Nuussuaq Peninsula (Upernavik Archipelago)				1896		-56.9146	74.1521	G 900	Film Negative	https://digital.library.cornell.edu/catalog/ss:12421698
12421699	tve_exp1896_149	Ice cap from base of upper Nugsuak glacier	Greenland	Nuussuaq Peninsula (Upernavik Archipelago)	Nugsuak Glacier			1896		-56.9146	74.1521	G 918	Film Negative	https://digital.library.cornell.edu/catalog/ss:12421699
12421700	tve_exp1896_150	Camp 3, Upper Nugssuak Peninsula and Cornell Glacier, in background	Greenland	Nuussuaq Peninsula (Upernavik Archipelago)	Cornell Glacier			1896		-55.9697	74.2259	G 855|Hope in harbor, also a Danish bank	Film Negative	https://digital.library.cornell.edu/catalog/ss:12421700
12421701	tve_exp1896_151	Umanak, Greenland	Greenland	Uummannaq Fjord				1896		-52.1272	70.6744	Glaciers 1284|Greenland II 89	Film Negative	https://digital.library.cornell.edu/catalog/ss:12421701
12421702	tve_exp1896_152	Glacier, Ummenak fjord	Greenland	Uummannaq Fjord				1896		-53.6636	70.8584	G 1361, Umanak?	Film Negative	https://digital.library.cornell.edu/catalog/ss:12421702
12421703	tve_exp1896_153	Umanak fjord, Greenland, valley glacier	Greenland	Uummannaq Fjord				1896		-53.6636	70.8584	G 1363	Film Negative	https://digital.library.cornell.edu/catalog/ss:12421703
12421704	tve_exp1896_154	Umanak Greenland	Greenland	Uummannaq Fjord				1896		-52.1272	70.6744	NA 1748	Film Negative	https://digital.library.cornell.edu/catalog/ss:12421704
12421705	tve_exp1896_155	Umanak, Greenland	Greenland	Uummannaq Fjord				1896		-52.1272	70.6744	NA 1883	Film Negative	https://digital.library.cornell.edu/catalog/ss:12421705
12421712	tve_exp1896_162	Umanak mountain, head of fjord	Greenland	Uummannaq Fjord				1896		-53.6636	70.8584	Greenland I 123	Film Negative	https://digital.library.cornell.edu/catalog/ss:12421712
12421713	tve_exp1896_163	Moraine at base of Umanak Peak, formerly Nunatak	Greenland	Uummannaq Fjord				1896				Greenland II 98	Film Negative	https://digital.library.cornell.edu/catalog/ss:12421713
12421714	tve_exp1896_164	Umanak fjord	Greenland	Uummannaq Fjord				1896		-53.6636	70.8584	Greenland II 101	Film Negative	https://digital.library.cornell.edu/catalog/ss:12421714
12421715	tve_exp1896_165	Umanak fjord	Greenland	Uummannaq Fjord				1896		-53.6636	70.8584	Greenland II 102	Film Negative	https://digital.library.cornell.edu/catalog/ss:12421715
12421718	tve_exp1896_168	Ice cap, Disko Island, Waigat Strait	Greenland	Uummannaq Fjord				1896		-52.7698	69.6687	G 1267	Film Negative	https://digital.library.cornell.edu/catalog/ss:12421718
12421719	tve_exp1896_169	Ice cap, Disko Island, Waigat Strait	Greenland	Uummannaq Fjord				1896		-52.7698	69.6687	Glaciers 1370|Copy negative of this in greenland album, von Engeln box 3	Film Negative	https://digital.library.cornell.edu/catalog/ss:12421719
12421720	tve_exp1896_170	Flower petal Waigat Strait	Greenland	Uummannaq Fjord				1896		-52.7046	70.0899	G 1450	Film Negative	https://digital.library.cornell.edu/catalog/ss:12421720
12421721	tve_exp1896_171	Waigat Strait	Greenland	Uummannaq Fjord				1896		-52.7046	70.0899		Film Negative	https://digital.library.cornell.edu/catalog/ss:12421721
12421722	tve_exp1896_172	Waigat Strait	Greenland	Uummannaq Fjord				1896		-52.7046	70.0899		Film Negative	https://digital.library.cornell.edu/catalog/ss:12421722
12421723	tve_exp1896_173	In the Waigat Strait	Greenland	Uummannaq Fjord				1896		-52.7046	70.0899		Film Negative	https://digital.library.cornell.edu/catalog/ss:12421723
12421724	tve_exp1896_174	In the Waigat Strait	Greenland	Uummannaq Fjord				1896		-52.7046	70.0899		Film Negative	https://digital.library.cornell.edu/catalog/ss:12421724
12559175	tve_exp1896_175_02	In the Waigat Strait	Greenland	Uummannaq Fjord				1896		-52.7046	70.0899		Film Negative	https://digital.library.cornell.edu/catalog/ss:12559175
12421725	tve_exp1896_175	In the Waigat Strait	Greenland	Uummannaq Fjord				1896		-52.7046	70.0899		Film Negative	https://digital.library.cornell.edu/catalog/ss:12421725
12421726	tve_exp1896_176	In the Waigat Strait	Greenland	Uummannaq Fjord				1896		-52.7046	70.0899		Film Negative	https://digital.library.cornell.edu/catalog/ss:12421726
12421727	tve_exp1896_177	In the Waigat Strait	Greenland	Uummannaq Fjord				1896		-52.7046	70.0899		Film Negative	https://digital.library.cornell.edu/catalog/ss:12421727
12421728	tve_exp1896_178	In the Waigat Strait	Greenland	Uummannaq Fjord				1896		-52.7046	70.0899		Film Negative	https://digital.library.cornell.edu/catalog/ss:12421728
12421729	tve_exp1896_179	The ice cap of Disko Island, in Waigat Strait	Greenland	Uummannaq Fjord				1896		-52.7698	69.6687	Greenland I 68	Film Negative	https://digital.library.cornell.edu/catalog/ss:12421729
12421730	tve_exp1896_180	Iceberg in Waigat Strait	Greenland	Uummannaq Fjord				1896		-52.7046	70.0899	Greenland II 28	Film Negative	https://digital.library.cornell.edu/catalog/ss:12421730
12421731	tve_exp1896_181	A delta in the Waigat Strait	Greenland	Uummannaq Fjord				1896		-52.7046	70.0899	Greenland II 106	Film Negative	https://digital.library.cornell.edu/catalog/ss:12421731
12421732	tve_exp1896_182	Disko Island, Waigat Strait	Greenland	Uummannaq Fjord				1896		-52.7046	70.0899		Film Negative	https://digital.library.cornell.edu/catalog/ss:12421732
12421733	tve_exp1896_183	Icebergs in Waigat Strait	Greenland	Uummannaq Fjord				1896		-52.7046	70.0899	G 1237	Film Negative	https://digital.library.cornell.edu/catalog/ss:12421733
12421734	tve_exp1896_184	Iceberg, Waigat Strait	Greenland	Uummannaq Fjord				1896		-52.7046	70.0899	G 1259	Film Negative	https://digital.library.cornell.edu/catalog/ss:12421734
12421735	tve_exp1896_185	Icebergs, Waigat Strait	Greenland	Uummannaq Fjord				1896		-52.7046	70.0899	Glaciers|1280 A Greenland	Film Negative	https://digital.library.cornell.edu/catalog/ss:12421735
12421736	tve_exp1896_186	Icebergs in Waigat Strait, Hope on left	Greenland	Uummannaq Fjord				1896		-52.7046	70.0899	G 1282	Film Negative	https://digital.library.cornell.edu/catalog/ss:12421736
12421737	tve_exp1896_187	Greenland coast	Greenland					1896				Greenland I 119	Film Negative	https://digital.library.cornell.edu/catalog/ss:12421737
12421738	tve_exp1896_188	Greenland coast	Greenland					1896				N America|1730 A Greenland	Film Negative	https://digital.library.cornell.edu/catalog/ss:12421738
12421739	tve_exp1896_189	Snow patches	Greenland					1896					Film Negative	https://digital.library.cornell.edu/catalog/ss:12421739
12421740	tve_exp1896_190	Greenland expedition	Greenland					1896					Film Negative	https://digital.library.cornell.edu/catalog/ss:12421740
12421741	tve_exp1896_191	Greenland expedition	Greenland					1896					Film Negative	https://digital.library.cornell.edu/catalog/ss:12421741
12421742	tve_exp1896_192	Greenland coast	Greenland					1896					Film Negative	https://digital.library.cornell.edu/catalog/ss:12421742
12421743	tve_exp1896_193	Greenland coast	Greenland					1896					Film Negative	https://digital.library.cornell.edu/catalog/ss:12421743
12421744	tve_exp1896_194	Greenland coast	Greenland					1896					Film Negative	https://digital.library.cornell.edu/catalog/ss:12421744
12559189	tve_exp1896_195_02	Greenland coast	Greenland					1896					Film Negative	https://digital.library.cornell.edu/catalog/ss:12559189
12421745	tve_exp1896_195	Greenland coast	Greenland					1896					Film Negative	https://digital.library.cornell.edu/catalog/ss:12421745
12421746	tve_exp1896_196	Greenland coast	Greenland					1896					Film Negative	https://digital.library.cornell.edu/catalog/ss:12421746
12421747	tve_exp1896_197	Greenland	Greenland					1896					Film Negative	https://digital.library.cornell.edu/catalog/ss:12421747
12559192	tve_exp1896_198_02	Greenland	Greenland					1896					Film Negative	https://digital.library.cornell.edu/catalog/ss:12559192
12421748	tve_exp1896_198	Greenland	Greenland					1896					Film Negative	https://digital.library.cornell.edu/catalog/ss:12421748
12421749	tve_exp1896_199	Greenland coast	Greenland					1896					Film Negative	https://digital.library.cornell.edu/catalog/ss:12421749
12421750	tve_exp1896_200	Greenland	Greenland					1896					Film Negative	https://digital.library.cornell.edu/catalog/ss:12421750
12421751	tve_exp1896_201	Icebergs	Greenland					1896					Film Negative	https://digital.library.cornell.edu/catalog/ss:12421751
12421752	tve_exp1896_202	Iceberg	Greenland					1896					Film Negative	https://digital.library.cornell.edu/catalog/ss:12421752
12421753	tve_exp1896_203	Icebergs	Greenland					1896					Film Negative	https://digital.library.cornell.edu/catalog/ss:12421753
12421754	tve_exp1896_204	Iceberg	Greenland					1896					Film Negative	https://digital.library.cornell.edu/catalog/ss:12421754
12421755	tve_exp1896_205	Iceberg	Greenland					1896					Film Negative	https://digital.library.cornell.edu/catalog/ss:12421755
12421756	tve_exp1896_206	Icebergs	Greenland					1896					Film Negative	https://digital.library.cornell.edu/catalog/ss:12421756
12421757	tve_exp1896_207	Icebergs	Greenland					1896					Film Negative	https://digital.library.cornell.edu/catalog/ss:12421757
12421758	tve_exp1896_208	Iceberg	Greenland					1896					Film Negative	https://digital.library.cornell.edu/catalog/ss:12421758
12421759	tve_exp1896_209	Iceberg, Greenland Coast	Greenland					1896				G 1246	Film Negative	https://digital.library.cornell.edu/catalog/ss:12421759
12421760	tve_exp1896_210	Iceberg with shattered face, Greenland coast	Greenland					1896				G 1258	Film Negative	https://digital.library.cornell.edu/catalog/ss:12421760
12421761	tve_exp1896_211	An Iceberg, shattered by recent breaking	Greenland					1896				G 1270	Film Negative	https://digital.library.cornell.edu/catalog/ss:12421761
12421762	tve_exp1896_212	Icebergs on Greenland Coast	Greenland					1896				G 1280	Film Negative	https://digital.library.cornell.edu/catalog/ss:12421762
12421765	tve_exp1896_215	Off Wilcox Head, cloud cap on Upernavik Island	Greenland	Nuussuaq Peninsula (Upernavik Archipelago)				1896		-57.2843	74.1041	Greenland I 49	Film Negative	https://digital.library.cornell.edu/catalog/ss:12421765
12421842	tve_exp1896_292	Strouded ice bergs from SS Hope, straits of Belle Isle	Greenland					1896				G-62|1699|L.S. 1234|Glaciers_ photo taken by [J.O] Martin	Glass	https://digital.library.cornell.edu/catalog/ss:12421842
12421843	tve_exp1896_293	Ice berg from Cornell Glacier	Greenland	Nuussuaq Peninsula (Upernavik Archipelago)	Cornell Glacier			1896				G-46|1678|Glaciers|LS 1247_ photo taken by [J.O.] Martin	Glass	https://digital.library.cornell.edu/catalog/ss:12421843
12421844	tve_exp1896_294	Wilcox Head Talus Slope	Greenland	Nuussuaq Peninsula (Upernavik Archipelago)				1896		-57.2843	74.1041	G-18-a|2261|Glaciers|LS 1379_ photo taken by [J.O.] Martin	Glass	https://digital.library.cornell.edu/catalog/ss:12421844
12421845	tve_exp1896_295	Ryder fjord from the Nugsuak. Mt. White, South Fjord	Greenland	Nuussuaq Peninsula (Upernavik Archipelago)				1896				G-21|2291|Glaciers|LS 1352_ photo taken by [J.O.] Martin	Glass	https://digital.library.cornell.edu/catalog/ss:12421845
12421846	tve_exp1896_296	South fjord Nuguak from camp 2|Ryder fjord 74 degrees 10 minutes N	Greenland	Nuussuaq Peninsula (Upernavik Archipelago)				1896				G-20|1689|Glaciers|LS 1276_ photo taken by [J.O.] Martin	Glass	https://digital.library.cornell.edu/catalog/ss:12421846
12421847	tve_exp1896_297	Scratched glacial boulder from Greenland	Greenland					1896				Glaciers 1776_ photo taken by [J.O] Martin	Glass	https://digital.library.cornell.edu/catalog/ss:12421847
12421848	tve_exp1896_298	Scratched pebble	Greenland					1896				Glaciers 1776_ photo taken by [J.O] Martin	Glass	https://digital.library.cornell.edu/catalog/ss:12421848
12421849	tve_exp1896_299	Scratched pebble from glacial soil	Greenland					1896				Glaciers 1779_ photo taken by [J.O.] Martin	Glass	https://digital.library.cornell.edu/catalog/ss:12421849
12421850	tve_exp1896_300	Ice front/print of Cornell Glacier	Greenland	Nuussuaq Peninsula (Upernavik Archipelago)	Cornell Glacier			1896		-55.9697	74.2259	G-48|Ice|Weathering|LS 2150_Wilcox Head|photo taken by [J.O.] Martin	Glass	https://digital.library.cornell.edu/catalog/ss:12421850
12421851	tve_exp1896_301	Weathered surface of hill, Wilcox Head	Greenland	Nuussuaq Peninsula (Upernavik Archipelago)				1896		-57.2843	74.1041	G-1|178|Glaciers|(79)_[other description on side crossed out] photo taken by [J.O] Martin	Glass	https://digital.library.cornell.edu/catalog/ss:12421851
12421852	tve_exp1896_302	Central Nunatak ice contact, Nuguak	Greenland	Nuussuaq Peninsula (Upernavik Archipelago)	Cornell Glacier			1896		-56.9146	74.1521	G-47|2160|Glaciers|LS 1003_ photo taken by [J.O.] Martin	Glass	https://digital.library.cornell.edu/catalog/ss:12421852
12421853	tve_exp1896_303	Surface of ice cap, Nugsuak, Lake on surface of glacier	Greenland	Nuussuaq Peninsula (Upernavik Archipelago)	Cornell Glacier			1896		-56.9146	74.1521	G-40|2109|Glaciers|LS 895_ photo taken by [J.O.] Martin	Glass	https://digital.library.cornell.edu/catalog/ss:12421853
12421854	tve_exp1896_304	Surface of ice cap, Nugsuak|Lat 74 degrees 10 minutes N	Greenland	Nuussuaq Peninsula (Upernavik Archipelago)				1896		-56.9146	74.1521	G-34|2108|Glaciers|LS 894_ photo taken by [J.O.] Martin	Glass	https://digital.library.cornell.edu/catalog/ss:12421854
12421855	tve_exp1896_305	On the ice cap, Nugsuak (Tarr)	Greenland	Nuussuaq Peninsula (Upernavik Archipelago)				1896		-56.9146	74.1521	G-37|2107|Glaciers|LS 892_ photo taken by [J.O.] Martin	Glass	https://digital.library.cornell.edu/catalog/ss:12421855
12421856	tve_exp1896_306	Mt. Schurman showing above ice cap, Nugsuak (Bonsteel)	Greenland	Nuussuaq Peninsula (Upernavik Archipelago)				1896		-56.0538	74.3718	G-36|2103|Glaciers|LS 891_Lat 74 degrees 10 minutes N|photo taken by [J.O.] Martin	Glass	https://digital.library.cornell.edu/catalog/ss:12421856
12421857	tve_exp1896_307	Medial moraine Mt. Schurman (Devil's Thumb, ice cap)	Greenland	Nuussuaq Peninsula (Upernavik Archipelago)				1896		-56.0538	74.3718	G-45|2100|Glaciers|LS 890_Lat 74 degrees 10 minutes N|photo taken by [J.O.] Martin	Glass	https://digital.library.cornell.edu/catalog/ss:12421857
12421858	tve_exp1896_308	Ice cap, Devil's Thumb in distance, Nugsuak|near Mt. Schurman	Greenland	Nuussuaq Peninsula (Upernavik Archipelago)				1896		-56.0538	74.3718	G-35|2102|Glaciers|LS 888_ photo taken by [J.O.] Martin	Glass	https://digital.library.cornell.edu/catalog/ss:12421858
12421859	tve_exp1896_309	Mt. White from ice cap	Greenland					1896				G-71|2111|Glaciers|LS 885_ photo taken by [J.O.] Martin	Glass	https://digital.library.cornell.edu/catalog/ss:12421859
12421860	tve_exp1896_310	Nunatak	Greenland	Nuussuaq Peninsula (Upernavik Archipelago)	Cornell Glacier			1896				G-39|2048|Glaciers|LS 878_Lat 74 degrees 10 minutes N|photo taken by [J.O.] Martin	Glass	https://digital.library.cornell.edu/catalog/ss:12421860
12421861	tve_exp1896_311	Ice front south from Cornell Glacier, Nugsuak|south arm of Cornell Glacier glaicer	Greenland	Nuussuaq Peninsula (Upernavik Archipelago)	Cornell Glacier			1896		-55.9697	74.2259	G-41|2043|Glaciers|LS 866_ photo taken by [J.O.] Martin	Glass	https://digital.library.cornell.edu/catalog/ss:12421861
12421862	tve_exp1896_312	Cornell Glacier, north arm, Nugsuak	Greenland	Nuussuaq Peninsula (Upernavik Archipelago)	Cornell Glacier			1896		-55.9697	74.2259	G-44|2045|Glaciers|LS 865_ photo taken by [J.O.] Martin	Glass	https://digital.library.cornell.edu/catalog/ss:12421862
12421864	tve_exp1896_314	Wyckoff glacier, from top of Devil's Thumb	Greenland	Nuussuaq Peninsula (Upernavik Archipelago)				1896				G-10|2046|Glaciers|LS 850_ photo taken by [J.O.] Martin	Glass	https://digital.library.cornell.edu/catalog/ss:12421864
12421865	tve_exp1896_315	View looking north east/east from top of Devil's Thumb	Greenland	Nuussuaq Peninsula (Upernavik Archipelago)				1896		-56.4598	74.31	G-3|2039|Glaciers|LS 848_Mt. Schurman in distance|photo taken by [J.O.] Martin	Glass	https://digital.library.cornell.edu/catalog/ss:12421865
12421866	tve_exp1896_316	View looking SE from top of Devil's Thumb	Greenland	Nuussuaq Peninsula (Upernavik Archipelago)				1896		-56.4598	74.31	G-4|2053|Glaciers|LS 846_Portage fjord etc.|photo taken by [J.O.] Martin	Glass	https://digital.library.cornell.edu/catalog/ss:12421866
12421867	tve_exp1896_317	West coast of Greenland near Cornell Glacier	Greenland	Nuussuaq Peninsula (Upernavik Archipelago)	Cornell Glacier			1896		-55.9697	74.2259	Glaciers 815 (Map)_ photo taken by [J.O.] Martin	Glass	https://digital.library.cornell.edu/catalog/ss:12421867
12421868	tve_exp1896_318	Camp #2 Nugsuak (Also says camp #3)	Greenland	Nuussuaq Peninsula (Upernavik Archipelago)				1896				2318|Glaciers|LS 1436_ photo taken by [J.O.] Martin	Glass	https://digital.library.cornell.edu/catalog/ss:12421868
12421900	tve_exp1896_350	Wilcox head (boulder stream) drift stream surface	Greenland	Nuussuaq Peninsula (Upernavik Archipelago)				1896		-57.2843	74.1041	G-18|2365|Glaciers|LS 1444_ photo taken by [J.O.] Martin	Glass	https://digital.library.cornell.edu/catalog/ss:12421900
12421901	tve_exp1896_351	Devil's Thumb Nugsuak from camp #3, peak, Mr. Operti	Greenland	Nuussuaq Peninsula (Upernavik Archipelago)				1896		-56.4598	74.31	G-24|2375|Glaciers|LS 1418 A_Lat 74 degrees 10 minutes N|photo taken by [J.O.] Martin	Glass	https://digital.library.cornell.edu/catalog/ss:12421901
12421902	tve_exp1896_352	Devil's Thumb from Camp #3|Nugsuak	Greenland	Nuussuaq Peninsula (Upernavik Archipelago)				1896		-56.4598	74.31	G-76|2375|Glaciers|LS 1418_Lat 74 degrees 10 minutes N|photo taken by [J.O.] Martin	Glass	https://digital.library.cornell.edu/catalog/ss:12421902
12421903	tve_exp1896_353	Devil's Thumb Nugsuak from camp #3, peak Mr. Operti	Greenland	Nuussuaq Peninsula (Upernavik Archipelago)				1896		-56.4598	74.31	G-26|Same as 2375|Glaciers|LS 1418_Lat 74 degrees 10 minutes N|Duplicate|photo taken by [J.O.] Martin	Glass	https://digital.library.cornell.edu/catalog/ss:12421903
12421904	tve_exp1896_354	Devil's Thumb Nugsuak from camp #3, rear portion|glaciated surfaces	Greenland	Nuussuaq Peninsula (Upernavik Archipelago)				1896		-56.4598	74.31	G-25|2369|Glaciers|LS 1415_ photo taken by [J.O.] Martin	Glass	https://digital.library.cornell.edu/catalog/ss:12421904
12421905	tve_exp1896_355	Entering Icy Bay camp #3 (poorest negative)|Nugsuak	Greenland	Nuussuaq Peninsula (Upernavik Archipelago)				1896				G-13|1680|Glaciers|LS 1275 A_Lat 74 degrees 10 minutes N|photo taken by [J.O.] Martin	Glass	https://digital.library.cornell.edu/catalog/ss:12421905
12421906	tve_exp1896_356	Crevasse ice cap Nugsuak	Greenland	Nuussuaq Peninsula (Upernavik Archipelago)	Cornell Glacier			1896				G-43|2104|Glaciers|LS 905_ photo taken by [J.O.] Martin	Glass	https://digital.library.cornell.edu/catalog/ss:12421906
12421907	tve_exp1896_357	Lakes. Ice front of Cornell Glacier, Nugsuak|Marginal lakes	Greenland	Nuussuaq Peninsula (Upernavik Archipelago)	Cornell Glacier			1896		-55.9697	74.2259	G-33|2221|Glaciers_Lat 74 degrees 10 minutes N|photo taken by [J.O.] Martin	Glass	https://digital.library.cornell.edu/catalog/ss:12421907
12556308		Alluvial fan, Waigat Strait Greenland, Tarr 1896, R1777	Greenland	Uummannaq Fjord				1896		-52.7046	70.0899		Film Negative	https://digital.library.cornell.edu/catalog/ss:12556308
12556309		Postglacial weathering and river work Grahavn [Godhavn?] harbor Greenland, Tarr 1896 R1778	Greenland	Uummannaq Fjord				1896		-52.7698	69.6687		Film Negative	https://digital.library.cornell.edu/catalog/ss:12556309
12556310		Upper lake Nugsuak penninsula, Greenland, Tarr 1896	Greenland	Nuussuaq Peninsula (Upernavik Archipelago)				1896		-56.9146	74.1521		Film Negative	https://digital.library.cornell.edu/catalog/ss:12556310
12556311		Rock basin lakes, Cornell Glacier, Greenland, Cornell Glacier is in background, Mt. Schurman on left, Tarr 1896, R+S 357	Greenland	Nuussuaq Peninsula (Upernavik Archipelago)	Cornell Glacier			1896		-55.9697	74.2259		Film Negative	https://digital.library.cornell.edu/catalog/ss:12556311
3322439	tve_exp1905_001	Salmon net in Wrangell Narrows	Alaska	Southern Panhandle				1905	USGS Petersburg (C3, D3)	-132.929	56.6565		Film Negative	https://digital.library.cornell.edu/catalog/ss:3322439
3322440	tve_exp1905_002	village	Alaska	Southern Panhandle				1905					Film Negative	https://digital.library.cornell.edu/catalog/ss:3322440
3322441	tve_exp1905_003	Steamer City of Seattle just below Dixon Entrance	Canada	Southern Panhandle				1905	USGS Dixon Entrance, Prince Rupurt	-131.951	54.3992		Film Negative	https://digital.library.cornell.edu/catalog/ss:3322441
3322442	tve_exp1905_004	Steamer Dolphin, just south of Wrangell Narrows	Alaska	Southern Panhandle				1905	USGS Petersburg (C3)	-132.929	56.6565		Film Negative	https://digital.library.cornell.edu/catalog/ss:3322442
3322443	tve_exp1905_005	Steamer Bertha in Narrows	Alaska	Southern Panhandle		18	June	1905	USGS Petersburg (C3, D3)	-132.929	56.6565		Film Negative	https://digital.library.cornell.edu/catalog/ss:3322443
3322444	tve_exp1905_006	Steamer in Wrangell Narrows	Alaska	Southern Panhandle				1905	USGS Petersburg (C3, D3)	-132.929	56.6565		Film Negative	https://digital.library.cornell.edu/catalog/ss:3322444
3322445	tve_exp1905_007	lighthouse ship in Sound	Alaska	Southern Panhandle				1905				North America 2014	Film Negative	https://digital.library.cornell.edu/catalog/ss:3322445
3322446	tve_exp1905_008	Steamer Dolphin, entering south end of Wrangell Narrows	Alaska	Southern Panhandle				1905	USGS Petersburg (C3)	-132.929	56.6565		Film Negative	https://digital.library.cornell.edu/catalog/ss:3322446
3322447	tve_exp1905_009	Stream	Alaska	Southern Panhandle				1905					Film Negative	https://digital.library.cornell.edu/catalog/ss:3322447
3322448	tve_exp1905_010	Looking north at north entrance of unknown bay.	Alaska	Southern Panhandle				1905				North America 2012	Film Negative	https://digital.library.cornell.edu/catalog/ss:3322448
3322449	tve_exp1905_011	Looking south	Alaska	Southern Panhandle				1905					Film Negative	https://digital.library.cornell.edu/catalog/ss:3322449
3322450	tve_exp1905_012	Looking out north of entrance	Alaska	Southern Panhandle				1905				North America 2011	Film Negative	https://digital.library.cornell.edu/catalog/ss:3322450
3322451	tve_exp1905_013	Looking north in over wreck of Coloradan	Alaska	Southern Panhandle				1905					Film Negative	https://digital.library.cornell.edu/catalog/ss:3322451
3322452	tve_exp1905_014	Looking north, up channel behind island	Alaska	Southern Panhandle				1905				North America 2016	Film Negative	https://digital.library.cornell.edu/catalog/ss:3322452
3322453	tve_exp1905_015	Valley entering Grenville channel from east not hanging	Canada	British Columbia				1905	NRC 103G/103H	-129.717	53.6167		Film Negative	https://digital.library.cornell.edu/catalog/ss:3322453
3322454	tve_exp1905_016	Hanging valley, Grenville Channel	Canada	British Columbia		19	June	1905	NRC 103G/103H	-129.717	53.6167	Glaciers 2968	Film Negative	https://digital.library.cornell.edu/catalog/ss:3322454
3322455	tve_exp1905_017	Hanging valley, Sarah Island	Canada	British Columbia				1905	NRC 103A10/103A9	-128.51	52.7839	Glaciers 2964	Film Negative	https://digital.library.cornell.edu/catalog/ss:3322455
3322456	tve_exp1905_018	Waterfall and hanging valley, west side of Frasier Reach	Canada	British Columbia				1905	NRC 103H02	-128.798	53.231		Film Negative	https://digital.library.cornell.edu/catalog/ss:3322456
3322457	tve_exp1905_019	Waterfall and hanging valley, west side of Frasier Reach	Canada	British Columbia				1905	NRC 103H02	-128.798	53.231		Film Negative	https://digital.library.cornell.edu/catalog/ss:3322457
3322458	tve_exp1905_020	Just north of Ketchikan platform of Moraine	Alaska	Southern Panhandle				1905	USGS Ketchikan (B5)				Film Negative	https://digital.library.cornell.edu/catalog/ss:3322458
3322459	tve_exp1905_021	Gulls at Yakutat Dock	Alaska	Yakutat				1905	USGS Yakutat (C5)	-139.727	59.5469		Film Negative	https://digital.library.cornell.edu/catalog/ss:3322459
3322460	tve_exp1905_022	Coal bluff, Atrevida Stream	Alaska	Yakutat	Atrevida Glacier			1905	USGS Yakutat (D5)				Film Negative	https://digital.library.cornell.edu/catalog/ss:3322460
3322461	tve_exp1905_023	Anticline, north of Point Espananza [Point Latouche]	Alaska	Yakutat				1905	USGS Yaktuat (D5)	-139.628	59.903		Film Negative	https://digital.library.cornell.edu/catalog/ss:3322461
3322462	tve_exp1905_024	Coal opening, west of Atrevida Glacier	Alaska	Yakutat	Atrevida Glacier			1905	USGS Yaktuat (D5)				Film Negative	https://digital.library.cornell.edu/catalog/ss:3322462
3322463	tve_exp1905_025	View looking north from camp site in Russell fiord. Taken late in evening	Alaska	Yakutat				1905	USGS Yaktuat (D4)	-139.318	59.8823		Film Negative	https://digital.library.cornell.edu/catalog/ss:3322463
3918993	tve_exp1905_026_02	View from near C. Enchantment (2800 ft) looking up Nunatak fiord	Alaska	Yakutat	Nunatak Glacier	23	July	1905	USGS Yaktuat (D4)	-139.315	59.8516	North America 2215	Film Negative	https://digital.library.cornell.edu/catalog/ss:3918993
3322464	tve_exp1905_026	View from near C. Enchantment (2800 ft) looking up Nunatak fiord	Alaska	Yakutat	Nunatak Glacier	23	July	1905	USGS Yaktuat (D4)	-139.315	59.8516	North America 2215	Film Negative	https://digital.library.cornell.edu/catalog/ss:3322464
3322465	tve_exp1905_027	Glacier ice benches from below divide near C. Enchantment	Alaska	Yakutat		23	July	1905	USGS Yaktuat (D4)	-139.315	59.8516	North America 2218	Film Negative	https://digital.library.cornell.edu/catalog/ss:3322465
3322466	tve_exp1905_028	Looking along from from ridge crest. Show hanging valley on plate.	Alaska	Yakutat		23	July	1905	USGS Yaktuat			North America 2219	Film Negative	https://digital.library.cornell.edu/catalog/ss:3322466
3322467	tve_exp1905_029	Glaciated valley of land end of Nunatak Glacier from Nunatak, looking west	Alaska	Yakutat	Nunatak Glacier	29	July	1905	USGS Yaktuat (D3)	-138.966	59.8104	Glaciers 2979	Film Negative	https://digital.library.cornell.edu/catalog/ss:3322467
3322468	tve_exp1905_030	Glacial, Marble Point	Alaska	Yakutat				1905	USGS Yaktuat (D4)	-139.399	59.9376		Film Negative	https://digital.library.cornell.edu/catalog/ss:3322468
3322469	tve_exp1905_031	Looking up Russell (Camp 1) valley, glacier at head	Alaska	Yakutat				1905	USGS Yaktuat			Glaciers 1994	Film Negative	https://digital.library.cornell.edu/catalog/ss:3322469
3322470	tve_exp1905_032	From hanging valley, north side of Russell Valley. Moraine covering valley.	Alaska	Yakutat		24	June	1905	USGS Yaktuat			Glaciers 2995	Film Negative	https://digital.library.cornell.edu/catalog/ss:3322470
3322471	tve_exp1905_033	From small hanging cirque, Russell valley north side	Alaska	Yakutat		25	June	1905	USGS Yaktuat				Film Negative	https://digital.library.cornell.edu/catalog/ss:3322471
3322472	tve_exp1905_034	Southwest point Knight Island. Sea sand invading.	Alaska	Yakutat		28	August	1905	USGS Yaktuat (C5)	-139.589	59.711	Oceans 1305	Film Negative	https://digital.library.cornell.edu/catalog/ss:3322472
3322473	tve_exp1905_035	Sinking of land on east side of head of Russell fiord	Alaska	Yakutat		31	July	1905	USGS Yaktuat (D4)	-139.355	59.9431	Oceans 1307	Film Negative	https://digital.library.cornell.edu/catalog/ss:3322473
3322474	tve_exp1905_036	Barnacles and vegetation on slate NE side of Russell fiord	Alaska	Yakutat		1	July	1905	USGS Yaktuat (D4)	-139.355	59.9431	Oceans 1481	Film Negative	https://digital.library.cornell.edu/catalog/ss:3322474
3322475	tve_exp1905_037	Barnacles in place on slate coast NE side Russell fiord, opposite Marble Point	Alaska	Yakutat		1	July	1905	USGS Yaktuat (D4)	-139.355	59.9431		Film Negative	https://digital.library.cornell.edu/catalog/ss:3322475
3322476	tve_exp1905_038	Looking east from same point as 125, on slate coast, opposite Marble Point	Alaska	Yakutat		5	August	1905	USGS Yaktuat (D4)	-139.355	59.9431		Film Negative	https://digital.library.cornell.edu/catalog/ss:3322476
3322477	tve_exp1905_039	Elevated beach, north side Russell fiord. Fan of Variegated Glacier in distance	Alaska	Yakutat	Variegated Glacier	5	August	1905	USGS Yaktuat (D4)	-139.355	59.9431		Film Negative	https://digital.library.cornell.edu/catalog/ss:3322477
3322478	tve_exp1905_040	Slate coast- looking west, from same point as 121	Alaska	Yakutat		5	August	1905	USGS Yaktuat	-139.355	59.9431	Oceans 1483	Film Negative	https://digital.library.cornell.edu/catalog/ss:3322478
3322479	tve_exp1905_041	front of alluvial fan, and desiccation base level. Near Haenke Island on peninsula	Alaska	Yakutat				1905	USGS Yaktuat (D5)				Film Negative	https://digital.library.cornell.edu/catalog/ss:3322479
3322480	tve_exp1905_042	Faults on Nunatak. Looking west.	Alaska	Yakutat	Nunatak Glacier			1905	USGS Yaktuat (D3)	-139.223	59.8459	Oceans 1496	Film Negative	https://digital.library.cornell.edu/catalog/ss:3322480
3919000	tve_exp1905_043_02	Faults on south side of Nunatak, Nunatak fiord	Alaska	Yakutat	Nunatak Glacier	24	July	1905	USGS Yaktuat (D3)	-139.223	59.8459	Oceans 1497	Film Negative	https://digital.library.cornell.edu/catalog/ss:3919000
3322481	tve_exp1905_043	Faults on south side of Nunatak, Nunatak fiord	Alaska	Yakutat	Nunatak Glacier	24	July	1905	USGS Yaktuat (D3)	-139.223	59.8459	Oceans 1497	Film Negative	https://digital.library.cornell.edu/catalog/ss:3322481
3919001	tve_exp1905_044_02	Faults 2-6 ft apart, south side of Nunatak	Alaska	Yakutat	Nunatak Glacier	29	July	1905	USGS Yaktuat (D3)	-139.223	59.8459	Oceans 1493	Film Negative	https://digital.library.cornell.edu/catalog/ss:3919001
3322482	tve_exp1905_044	Faults 2-6 ft apart, south side of Nunatak	Alaska	Yakutat	Nunatak Glacier	29	July	1905	USGS Yaktuat (D3)	-139.223	59.8459	Oceans 1493	Film Negative	https://digital.library.cornell.edu/catalog/ss:3322482
3322483	tve_exp1905_045	Looking along near fault (135). Fault 6 ft-	Alaska	Yakutat	Nunatak Glacier	29	July	1905	USGS Yaktuat (D3)			Oceans 1499	Film Negative	https://digital.library.cornell.edu/catalog/ss:3322483
3322484	tve_exp1905_046	Looking along same new fault as 134 north Nunatak fiord	Alaska	Yakutat	Nunatak Glacier	29	July	1905	USGS Yaktuat (D3)	-139.223	59.8459	Oceans 1500	Film Negative	https://digital.library.cornell.edu/catalog/ss:3322484
3322485	tve_exp1905_047	Gravels, south side Nunatak Fiord and valley at contact of Yakutat and crystalline.	Alaska	Yakutat	Nunatak Glacier	8	July	1905	USGS Yaktuat (D3)	-139.223	59.8459	North America 2588	Film Negative	https://digital.library.cornell.edu/catalog/ss:3322485
3322486	tve_exp1905_048	Logan beach, east side of Yakutat	Alaska	Yakutat				1905	USGS Yaktuat (C5)	-139.595	59.8146		Film Negative	https://digital.library.cornell.edu/catalog/ss:3322486
3322487	tve_exp1905_049	Gravels on west side of Russell fiord, nearly opposite Russell Cove	Alaska	Yakutat		10	July	1905	USGS Yaktuat (D4)	-139.345	59.8228	North America 2585	Film Negative	https://digital.library.cornell.edu/catalog/ss:3322487
3322488	tve_exp1905_050	Gravel terrace south of Cape Enchantment, on west side of Russell fiord	Alaska	Yakutat		10	July	1905	USGS Yaktuat (D4)	-139.345	59.8228	North America 2584	Film Negative	https://digital.library.cornell.edu/catalog/ss:3322488
3322489	tve_exp1905_051	Moraine on gravel terrace, west side of Russell fiord. Also march of vegetation. Also gravels on east side of valley	Alaska	Yakutat		10	July	1905	USGS Yaktuat (D4)	-139.345	59.8228	North America 2594	Film Negative	https://digital.library.cornell.edu/catalog/ss:3322489
3322490	tve_exp1905_052	Esker in gravels Cape Enchantment west side Russell fiord	Alaska	Yakutat		23	July	1905	USGS Yaktuat (D4)	-139.315	59.8516		Film Negative	https://digital.library.cornell.edu/catalog/ss:3322490
3322491	tve_exp1905_053	Iceberg in Russell fiord. Hubbard Glacier in background	Alaska	Yakutat	Hubbard Glacier			1905	USGS Yaktuat (D4)	-139.355	59.9431	North America 2578	Film Negative	https://digital.library.cornell.edu/catalog/ss:3322491
3322492	tve_exp1905_054	Small glacier	Alaska	Yakutat				1905					Film Negative	https://digital.library.cornell.edu/catalog/ss:3322492
3322493	tve_exp1905_055	Moraine - covered ice - valley on Puget Peninsula, near Cape Enchantment	Alaska	Yakutat				1905	USGS Yakutat (D4)	-139.315	59.8516		Film Negative	https://digital.library.cornell.edu/catalog/ss:3322493
3322494	tve_exp1905_056	North lateral moraine of glacier at head of Russell valley	Alaska	Yakutat		24	June	1905	USGS Yakutat (D4)			North America 2562	Film Negative	https://digital.library.cornell.edu/catalog/ss:3322494
3322495	tve_exp1905_057	Eroded gravels with moraine. Also, on opposite side, stagnant ice covered with moraine now resting on gravels.	Alaska	Yakutat		10	July	1905				North America 2592	Film Negative	https://digital.library.cornell.edu/catalog/ss:3322495
3322496	tve_exp1905_058	Small glacier	Alaska	Yakutat				1905				North America 2561	Film Negative	https://digital.library.cornell.edu/catalog/ss:3322496
3322497	tve_exp1905_059	Mt. Cook and Lucia Glacier from top of Nunatak	Alaska	Yakutat	Lucia Glacier	22	August	1905	USGS Yakutat (D6), Mount St. Elias (A6)	-139.985	60.1647		Film Negative	https://digital.library.cornell.edu/catalog/ss:3322497
3322498	tve_exp1905_060	Terrace point from 530 Foot on Lucia Glacier and directly east of Nunatak	Alaska	Yakutat	Lucia Glacier	22	August	1905	USGS Yakutat (D6)	-139.839	59.957		Film Negative	https://digital.library.cornell.edu/catalog/ss:3322498
3322499	tve_exp1905_061	Panorama from south Floral Hills, at 1585 ft, over Hayden and Malaspina Glaciers	Alaska	Yakutat	Hayden Glacier	22	August	1905	USGS Yakutat (D6)	-139.988	59.9963		Film Negative	https://digital.library.cornell.edu/catalog/ss:3322499
3322500	tve_exp1905_062	Panorama from south Floral Hills Pass, at 1585 ft, over Hayden and Malaspina Glaciers	Alaska	Yakutat	Hayden Glacier	22	August	1905	USGS Yakutat (D6)	-139.988	59.9963		Film Negative	https://digital.library.cornell.edu/catalog/ss:3322500
3322501	tve_exp1905_063	Panorama from south Floral Hills Pass, at 1585 ft, over Hayden and Malaspina Glaciers	Alaska	Yakutat	Hayden Glacier	22	August	1905	USGS Yakutat (D6)	-139.988	59.9963		Film Negative	https://digital.library.cornell.edu/catalog/ss:3322501
3322502	tve_exp1905_064	Panorama from south Floral Hills Pass, at 1585 ft, over Hayden and Malaspina Glaciers	Alaska	Yakutat	Hayden Glacier	22	August	1905	USGS Yakutat (D6)	-139.988	59.9963		Film Negative	https://digital.library.cornell.edu/catalog/ss:3322502
3322503	tve_exp1905_065	Looking up Hayden Glacier from 1290 ft on west slope of Floral Hills, south of pass	Alaska	Yakutat	Hayden Glacier	22	August	1905	USGS Yakutat (D6)	-140.025	59.988		Film Negative	https://digital.library.cornell.edu/catalog/ss:3322503
3322504	tve_exp1905_066	On Atrevida Glacier	Alaska	Yakutat	Atrevida Glacier			1905	USGS Yaktuat (D5)	-139.787	59.9709	North America 2248	Film Negative	https://digital.library.cornell.edu/catalog/ss:3322504
3322505	tve_exp1905_067	Galiano Glacier from approximate site of Russell's picture	Alaska	Yakutat	Galiano Glacier	21	August	1905	USGS Yaktuat (D5)	-139.715	59.9722	North America 2302	Film Negative	https://digital.library.cornell.edu/catalog/ss:3322505
3322506	tve_exp1905_068	Galiano Glacier from approximate site of Russell's	Alaska	Yakutat	Galiano Glacier	21	August	1905	USGS Yaktuat (D5)	-139.715	59.9722	North America 1303	Glass	https://digital.library.cornell.edu/catalog/ss:3322506
3322507	tve_exp1905_069	Galiano Fan, from site of Russell's pictures	Alaska	Yakutat	Galiano Glacier			1905	USGS Yaktuat (D5)	-139.715	59.9722	North America 2306	Glass	https://digital.library.cornell.edu/catalog/ss:3322507
3322508	tve_exp1905_070	Buried in SW end of Galiano Glacier	Alaska	Yakutat	Galiano Glacier	21	August	1905	USGS Yaktuat (D5)	-139.715	59.9722	North America 2309	Film Negative	https://digital.library.cornell.edu/catalog/ss:3322508
3322509	tve_exp1905_071	Moraine carved by Atrevida stream	Alaska	Yakutat	Atrevida Glacier	21	August	1905	USGS Yakutat (D5)				Film Negative	https://digital.library.cornell.edu/catalog/ss:3322509
3322510	tve_exp1905_072	Black Glacier from Russell's site	Alaska	Yakutat	Black Glacier	21	August	1905	USGS Yaktuat (D5)	-139.66	0722351 59.95439044547405		Film Negative	https://digital.library.cornell.edu/catalog/ss:3322510
2891661	tve_exp1905_073	Turner Glacier from peninsula just north of Haenke (Island)	Alaska	Yakutat	Turner Glacier	3	July	1905	USGS Mount St. Elias (A5)	-139.626	60.0271		Film Negative	https://digital.library.cornell.edu/catalog/ss:2891661
2891659	tve_exp1905_074	Turner Glacier from peninsula, north end of Haenke (Island)	Alaska	Yakutat	Turner Glacier	3	July	1905	USGS Mount St. Elias (A5)	-139.626	60.0271		Film Negative	https://digital.library.cornell.edu/catalog/ss:2891659
2891657	tve_exp1905_075	Turner Glacier from of Haenke site of Gilbert's	Alaska	Yakutat	Turner Glacier	13	August	1905	USGS Mount St. Elias (A5)	-139.626	60.0271		Film Negative	https://digital.library.cornell.edu/catalog/ss:2891657
2891658	tve_exp1905_076	Turner Glacier from Haenke	Alaska	Yakutat	Turner Glacier	13	August	1905	USGS Mount St. Elias (A5)	-139.626	60.0271		Film Negative	https://digital.library.cornell.edu/catalog/ss:2891658
3322515	tve_exp1905_077	Turner Glacier, from 1/4 mile from south end of glacier	Alaska	Yakutat	Turner Glacier	14	August	1905	USGS Mount St. Elias (A5)	-139.626	60.0271	North America 2354	Film Negative	https://digital.library.cornell.edu/catalog/ss:3322515
3322516	tve_exp1905_078	Panorama from rock 1/4 mile south of Turner Glacier	Alaska	Yakutat	Turner Glacier	14	August	1905	USGS Mount St. Elias (A5)	-139.626	60.0271	North America 2357	Film Negative	https://digital.library.cornell.edu/catalog/ss:3322516
3322517	tve_exp1905_079	Panorama from rock 1/4 mile from south end of Turner Glacier	Alaska	Yakutat	Turner Glacier	14	August	1905	USGS Mount St. Elias (A5)	-139.626	60.0271	North America 2388	Film Negative	https://digital.library.cornell.edu/catalog/ss:3322517
3322518	tve_exp1905_080	Panorama of Turner Glacier from 525 ft on hillslope, near waterfall, south edge of glacier	Alaska	Yakutat	Turner Glacier	14	August	1905	USGS Mount St. Elias (A5)	-139.626	60.0271	North America 2358	Film Negative	https://digital.library.cornell.edu/catalog/ss:3322518
3322519	tve_exp1905_081	No label: Likely Panorama of Turner Glacier	Alaska	Yakutat				1905	USGS Mount St. Elias (A5)			North America 2356	Film Negative	https://digital.library.cornell.edu/catalog/ss:3322519
2891660	tve_exp1905_082	Hubbard Glacier from north of Haenke Island	Alaska	Yakutat	Hubbard Glacier	3	July	1905	USGS Mount St. Elias (A4,A5)	-139.466	60.0247		Film Negative	https://digital.library.cornell.edu/catalog/ss:2891660
3322521	tve_exp1905_083	Looking NW from crest of Marble Point	Alaska	Yakutat		5	August	1905	USGS Mount St. Elias (A4)	-139.355	59.9431		Film Negative	https://digital.library.cornell.edu/catalog/ss:3322521
2891662	tve_exp1905_084	Hubbard Glacier from west side of Haenke Island. Shows stripped where avalanche wave 115 ft.	Alaska	Yakutat	Hubbard Glacier	13	August	1905	USGS Mount St. Elias (A4,A5)	-139.466	60.0247		Film Neg.	https://digital.library.cornell.edu/catalog/ss:2891662
2891667	tve_exp1905_085	Front of Hubbard Glacier from fiord	Alaska	Yakutat	Hubbard Glacier	30	June	1905	USGS Mount St. Elias (A4,A5)	-139.466	60.0247		Film Neg.	https://digital.library.cornell.edu/catalog/ss:2891667
3322524	tve_exp1905_086	Headland of Hubbard Glacier from fiord	Alaska	Yakutat	Hubbard Glacier	30	June	1905	USGS Mount St. Elias (A4,A5)	-139.466	60.0247	North America 2397	Film Negative	https://digital.library.cornell.edu/catalog/ss:3322524
3322525	tve_exp1905_087	Hubbard from east end, near Gilbert's site	Alaska	Yakutat	Hubbard Glacier	8	August	1905	USGS Mount St. Elias (A4,A5)	-139.466	60.0247		Film Negative	https://digital.library.cornell.edu/catalog/ss:3322525
3322526	tve_exp1905_088	Hubbard Glacier from its eastern edge- nearly in Gilbert's site	Alaska	Yakutat	Hubbard Glacier	8	August	1905	USGS Mount St. Elias (A4,A5)	-139.466	60.0247		Glass	https://digital.library.cornell.edu/catalog/ss:3322526
3322527	tve_exp1905_089	Front of Hubbard Glacier from eastern edge, near Gilbert's site	Alaska	Yakutat	Hubbard Glacier	8	August	1905	USGS Mount St. Elias (A4,A5)	-139.466	60.0247	North America 2394	Glass	https://digital.library.cornell.edu/catalog/ss:3322527
3322528	tve_exp1905_090	Turner Glacier front and Hubbard Glacier from rock 1/2 mile from southern edge of Turner	Alaska	Yakutat	Hubbard Glacier	14	August	1905	USGS Mount St. Elias (A4,A5)	-139.466	60.0247	North America 2389	Glass	https://digital.library.cornell.edu/catalog/ss:3322528
2891663	tve_exp1905_091	Hubbard Glacier from crest of Haenke Island	Alaska	Yakutat	Hubbard Glacier			1905	USGS Mount St. Elias (A4,A5)	-139.466	60.0247		Film Negative	https://digital.library.cornell.edu/catalog/ss:2891663
3952582	tve_exp1905_092_02	Panorama from Gilbert's 1000 ft site on Gilbert Pt.	Alaska	Yakutat	Hubbard Glacier			1905	USGS Mount St. Elias (A4,A5)	-139.466	60.0247		Glass	https://digital.library.cornell.edu/catalog/ss:3952582
2891664	tve_exp1905_092	Panorama from Gilbert's 1000 ft site on Gilbert Pt.	Alaska	Yakutat	Hubbard Glacier			1905	USGS Mount St. Elias (A4,A5)	-139.466	60.0247		Glass	https://digital.library.cornell.edu/catalog/ss:2891664
2891665	tve_exp1905_093	Panorama from Gilbert's 1000 ft site Gilbert Pt.	Alaska	Yakutat	Hubbard Glacier	8	August	1905	USGS Mount St. Elias (A4,A5)	-139.466	60.0247		Film Negative	https://digital.library.cornell.edu/catalog/ss:2891665
2891666	tve_exp1905_094	Panorama from Gilbert's 1000 ft site Gilbert Pt.	Alaska	Yakutat	Hubbard Glacier	8	August	1905	USGS Mount St. Elias (A4,A5)	-139.466	60.0247		Film Negative	https://digital.library.cornell.edu/catalog/ss:2891666
2891668	tve_exp1905_095	Panorama from Gilbert's 1000 ft site Gilbert Pt.	Alaska	Yakutat	Hubbard Glacier	8	August	1905	USGS Mount St. Elias (A4,A5)	-139.466	60.0247		Film Negative	https://digital.library.cornell.edu/catalog/ss:2891668
2891669	tve_exp1905_096	Panorama from Gilbert's 1000 ft site Gilbert Pt.	Alaska	Yakutat	Hubbard Glacier	8	August	1905	USGS Mount St. Elias (A4,A5)	-139.466	60.0247		Film Negative	https://digital.library.cornell.edu/catalog/ss:2891669
2891670	tve_exp1905_097	Panorama from Gilbert's 1000 ft site Gilbert Pt.	Alaska	Yakutat	Hubbard Glacier	8	August	1905	USGS Mount St. Elias (A4,A5)	-139.466	60.0247		Film Negative	https://digital.library.cornell.edu/catalog/ss:2891670
3322536	tve_exp1905_098	West of Hubbard Glacier from 600 ft up on Gilbert Point	Alaska	Yakutat	Hubbard Glacier	8	August	1905	USGS Mount St. Elias (A5)	-139.466	60.0247	North America 2378	Film Negative	https://digital.library.cornell.edu/catalog/ss:3322536
3322537	tve_exp1905_099	Hubbard Glacier from crest of Osier site	Alaska	Yakutat	Hubbard Glacier			1905	USGS Mount St. Elias (A4)	-139.466	60.0247	North America 2372	Glass	https://digital.library.cornell.edu/catalog/ss:3322537
3322538	tve_exp1905_100	Hubbard Glacier from Russell's '91 site on crest of Osier Island	Alaska	Yakutat	Hubbard Glacier	8	August	1905	USGS Mount St. Elias (A4)	-139.466	60.0247	North America 2371	Film Negative	https://digital.library.cornell.edu/catalog/ss:3322538
3322539	tve_exp1905_101	Looking at ice from moraine in eastern margin of Hubbard glacier	Alaska	Yakutat	Hubbard Glacier	5	July	1905	USGS Mount St. Elias (A4)	-139.466	60.0247	North America 2408	Film Negative	https://digital.library.cornell.edu/catalog/ss:3322539
3322540	tve_exp1905_102	Lake on east side of Hubbard Glacier, looking SE	Alaska	Yakutat	Hubbard Glacier	5	July	1905	USGS Yaktuat (D4)	-139.365	60.0132	North America 2402	Film Negative	https://digital.library.cornell.edu/catalog/ss:3322540
3322541	tve_exp1905_103	Alluvial fan just east of live ice of Hubbard Glacier	Alaska	Yakutat	Hubbard Glacier	5	July	1905	USGS Yaktuat (D4)	-139.466	60.0247	North America 2401	Film Negative	https://digital.library.cornell.edu/catalog/ss:3322541
3322542	tve_exp1905_104	Looking along eastern margin of Hubbard Glacier, toward Osier Island	Alaska	Yakutat	Hubbard Glacier			1905	USGS Mount St. Elias (A4), Yakutat (D4)	-139.466	60.0247	North America 2403	Film Negative	https://digital.library.cornell.edu/catalog/ss:3322542
3322543	tve_exp1905_105	Large in stagnant ice of margin of Hubbard	Alaska	Yakutat	Hubbard Glacier	5	July	1905	USGS Yakutat (D4)	-139.466	60.0247	North America 2412	Film Negative	https://digital.library.cornell.edu/catalog/ss:3322543
3322544	tve_exp1905_106	Large ice water on eastern margin of Hubbard Glacier looking NW	Alaska	Yakutat	Hubbard Glacier	5	July	1905	USGS Mount St. Elias (A4)	-139.466	60.0247	North America 2413	Film Negative	https://digital.library.cornell.edu/catalog/ss:3322544
3322545	tve_exp1905_107	Edge of interior wash plain, showing granite. From edge of moraine ice at 205 ft, looking NW of Hubbard Glacier	Alaska	Yakutat	Hubbard Glacier	6	August	1905	USGS Mount St. Elias (A4)	-139.365	60.0132	North America 2438	Film Negative	https://digital.library.cornell.edu/catalog/ss:3322545
3322546	tve_exp1905_108	Panorama of interior wash plain from east end of green moraine, east of Hubbard Glacier, looking west	Alaska	Yakutat	Hubbard Glacier	6	August	1905	USGS Yaktuat (D4)	-139.365	60.0132	North America 2441	Film Negative	https://digital.library.cornell.edu/catalog/ss:3322546
3322547	tve_exp1905_109	Panorama of interior wash plain from east end of green moraine, east of Hubbard Glacier, looking west	Alaska	Yakutat	Hubbard Glacier	6	August	1905	USGS Yaktuat (D4)	-139.365	60.0132	North America 2437	Film Negative	https://digital.library.cornell.edu/catalog/ss:3322547
3322548	tve_exp1905_110	Moraine, elevation of 850 ft, looking up Serpentine and Flat Glacier and moraine.	Alaska	Yakutat	Serpentine Glacier	6	August	1905	USGS Yakutat (C3,C4)			North America 2433	Film Negative	https://digital.library.cornell.edu/catalog/ss:3322548
3322549	tve_exp1905_111	Panorama of Serpentine and Flat Glaciers, from red moraine, elevation of 870 Ft.	Alaska	Yakutat	Serpentine Glacier	6	August	1905	USGS Yakutat (C3,C4)			North America 2435	Film Negative	https://digital.library.cornell.edu/catalog/ss:3322549
3322550	tve_exp1905_112	Panorama of Serpentine and Flat Glaciers, from red moraine, elevation of 870 Feet	Alaska	Yakutat	Serpentine Glacier	6	August	1905	USGS Yakutat (C3,C4)			North America 2432	Film Negative	https://digital.library.cornell.edu/catalog/ss:3322550
3322551	tve_exp1905_113	Bright red moraine from, east face of green moraine. Ice showing in face. East of Hubbard Glacier	Alaska	Yakutat	Hubbard Glacier	6	August	1905	USGS Yakutat (D4)	-139.365	60.0132	North America 2430	Film Negative	https://digital.library.cornell.edu/catalog/ss:3322551
3322552	tve_exp1905_114	Green moraine from its north end at elevation of 450 Feet East of Hubbard Glacier	Alaska	Yakutat	Hubbard Glacier	6	August	1905	USGS Yaktuat (D4)	-139.365	60.0132	North America 2431	Film Negative	https://digital.library.cornell.edu/catalog/ss:3322552
3322553	tve_exp1905_115	Moraine east of Hubbard Glacier, from margin of glacier. Looking SE up Russell Fiord	Alaska	Yakutat	Hubbard Glacier	5	July	1905	USGS Yaktuat (D4)	-139.365	60.0132	North America 2596	Film Negative	https://digital.library.cornell.edu/catalog/ss:3322553
3322554	tve_exp1905_116	West (or downstream) end of ice tunnel. 100 in moraine of Variegated Glaicer	Alaska	Yakutat	Variegated Glacier	6	August	1905	USGS Yaktuat (D4)	-139.287	59.9999		Film Negative	https://digital.library.cornell.edu/catalog/ss:3322554
3322555	tve_exp1905_117	East of upper end of ice tunnel 100 yards long in moraine of Variegated Glacier	Alaska	Yakutat	Variegated Glacier	6	August	1905	USGS Yaktuat (D4)	-139.287	59.9999		Film Negative	https://digital.library.cornell.edu/catalog/ss:3322555
3322556	tve_exp1905_118	Sea end of Nunatak Glacier (Gilbert's site)	Alaska	Yakutat	Nunatak Glacier			1905	USGS Yaktuat (D3)	-138.966	59.8104		Film Negative	https://digital.library.cornell.edu/catalog/ss:3322556
3322557	tve_exp1905_119	Nunatak Glacier from north side of Nunatak Fiord	Alaska	Yakutat	Nunatak Glacier	8	July	1905	USGS Yaktuat (D3)	-138.966	59.8104	Glaciers 2975	Film Negative	https://digital.library.cornell.edu/catalog/ss:3322557
3322558	tve_exp1905_120	Nunatak Glacier from tail of Nunatak. Exact site of Gilbert's	Alaska	Yakutat	Nunatak Glacier	24	July	1905	USGS Yaktuat (D3)	-138.966	59.8104	North America 2488	Film Negative	https://digital.library.cornell.edu/catalog/ss:3322558
3322559	tve_exp1905_121	Panorama of front of sea end of Nunatak Glacier from just below (west) the stream from small hanging glacier for N side of fiord	Alaska	Yakutat	Nunatak Glacier	28	July	1905	USGS Yaktuat (D3)	-138.966	59.8104	North America 2478	Glass	https://digital.library.cornell.edu/catalog/ss:3322559
3322560	tve_exp1905_122	Tidal end of Nunatak Glacier from NW near a large boulder in it 100 yards from water in alluvial fan	Alaska	Yakutat	Nunatak Glacier	28	July	1905	USGS Yaktuat (D3)	-138.966	59.8104	North America 2475	Film Negative	https://digital.library.cornell.edu/catalog/ss:3322560
3322561	tve_exp1905_123	Sea end of Nunatak glacier from north side of fiord	Alaska	Yakutat	Nunatak Glacier	28	July	1905	USGS Yaktuat (D3)	-138.966	59.8104	North America 2476	Film Negative	https://digital.library.cornell.edu/catalog/ss:3322561
3322562	tve_exp1905_124	Sea end of Nunatak Glacier from north side of fiord	Alaska	Yakutat	Nunatak Glacier	28	July	1905	USGS Yaktuat (D3)	-138.966	59.8104	North America 2479	Film Negative	https://digital.library.cornell.edu/catalog/ss:3322562
3322563	tve_exp1905_125	Panorama from north side of Nunatak fiord from elevation of 740 ft on gravel terrace	Alaska	Yakutat	Nunatak Glacier	28	July	1905	USGS Yaktuat (D3)	-138.966	59.8104	Glaciers 2977	Film Negative	https://digital.library.cornell.edu/catalog/ss:3322563
3322564	tve_exp1905_126	Sea end of Nunatak Glacier from fiord at distance of about 1/2 mile	Alaska	Yakutat	Nunatak Glacier	28	July	1905	USGS Yaktuat (D3)	-138.966	59.8104		Film Negative	https://digital.library.cornell.edu/catalog/ss:3322564
3322565	tve_exp1905_127	Nunatak Glacier, from 450 above sea level on gravel terrace, 5 minutes after 314	Alaska	Yakutat	Nunatak Glacier	28	July	1905	USGS Yaktuat (D3)	-138.966	59.8104		Film Negative	https://digital.library.cornell.edu/catalog/ss:3322565
3322566	tve_exp1905_128	Iceberg breaking off. 314 before breaking. From 450 Feet on gravel terrace, north side.	Alaska	Yakutat		28	July	1905	USGS Yaktuat (D3)				Film Negative	https://digital.library.cornell.edu/catalog/ss:3322566
3322567	tve_exp1905_129	Nunatak Glacier from fiord, near site where it stood in 1899	Alaska	Yakutat	Nunatak Glacier	24	July	1905	USGS Yaktuat (D3)	-138.966	59.8104	North America 2477	Film Negative	https://digital.library.cornell.edu/catalog/ss:3322567
3322568	tve_exp1905_130	Front of Nunatak Glacier from crest of Nunatak (1350 ft). Berg just fallen, above black shot.	Alaska	Yakutat	Nunatak Glacier	29	July	1905	USGS Yaktuat (D3)	-138.966	59.8104		Film Negative	https://digital.library.cornell.edu/catalog/ss:3322568
3322569	tve_exp1905_131	End of Nunatak Glacier from crest of Nunatak 1390 Feet	Alaska	Yakutat	Nunatak Glacier	29	July	1905	USGS Yaktuat (D3)	-138.966	59.8104		Film Negative	https://digital.library.cornell.edu/catalog/ss:3322569
3322570	tve_exp1905_132	End of Nunatak Glacier from crest of Nunatak 1390 Feet just fallen. 12 minutes after picture 317.	Alaska	Yakutat	Nunatak Glacier	29	July	1905	USGS Yaktuat (D3)	-138.966	59.8104	North America 2483	Film Negative	https://digital.library.cornell.edu/catalog/ss:3322570
3322571	tve_exp1905_133	Sea end of Nunatak Glacier from 1335 ft on Nunatak	Alaska	Yakutat	Nunatak Glacier	29	July	1905	USGS Yaktuat (D3)	-138.966	59.8104	North America 2484	Film Negative	https://digital.library.cornell.edu/catalog/ss:3322571
3322572	tve_exp1905_134	Panorama of Nunatak Glacier from 1400 ft on crest of Nunatak.	Alaska	Yakutat	Nunatak Glacier	29	July	1905	USGS Yaktuat (D3)	-138.966	59.8104	North America 2458	Film Negative	https://digital.library.cornell.edu/catalog/ss:3322572
3322573	tve_exp1905_135	Panorama of Nunatak Glacier from 1400 ft on crest of Nunatak	Alaska	Yakutat	Nunatak Glacier	29	July	1905	USGS Yaktuat (D3)	-138.966	59.8104	North America 2457	Film Negative	https://digital.library.cornell.edu/catalog/ss:3322573
3322574	tve_exp1905_136	Land end of Nunatak Glacier and faulting, from southern margin of Nunatak	Alaska	Yakutat	Nunatak Glacier	24	July	1905	USGS Yaktuat (D3)	-138.966	59.8104	North America 2468	Film Negative	https://digital.library.cornell.edu/catalog/ss:3322574
3322575	tve_exp1905_137	Land end of Nunatak Glacier	Alaska	Yakutat	Nunatak Glacier	27	July	1905	USGS Yaktuat (D3)	-138.966	59.8104	North America 2465	Glass	https://digital.library.cornell.edu/catalog/ss:3322575
3322576	tve_exp1905_138	Land end of Nunatak Glacier	Alaska	Yakutat	Nunatak Glacier	27	July	1905	USGS Yaktuat (D3)	-138.966	59.8104	North America 2464	Film Negative	https://digital.library.cornell.edu/catalog/ss:3322576
3322577	tve_exp1905_139	Land end of Nunatak Glacier from near Gilbert's site. Looking east	Alaska	Yakutat	Nunatak Glacier	27	July	1905	USGS Yaktuat (D3)	-138.966	59.8104		Film Negative	https://digital.library.cornell.edu/catalog/ss:3322577
3322578	tve_exp1905_140	Cascading Glacier from 1410 ft of Nunatak	Alaska	Yakutat	Cascading Glacier	29	July	1905	USGS Yaktuat (D3)	-139.061	59.7988	North America 2492	Film Negative	https://digital.library.cornell.edu/catalog/ss:3322578
3322579	tve_exp1905_141	Cascading Glacier from near Gilbert's site	Alaska	Yakutat	Cascading Glacier	24	July	1905	USGS Yaktuat (D3)	-139.061	59.7988	Glaciers 2978	Film Negative	https://digital.library.cornell.edu/catalog/ss:3322579
3322580	tve_exp1905_142	Valley, tributary of Hidden Glacier valley, along contact of slate and Yakutat.	Alaska	Yakutat	Hidden Glacier	26	July	1905	USGS Yaktuat (D4)				Film Negative	https://digital.library.cornell.edu/catalog/ss:3322580
3322581	tve_exp1905_143	Hidden Glacier from near Gilbert's site. North side of valley on elevated gravel beach	Alaska	Yakutat	Hidden Glacier	26	July	1905	USGS Yaktuat (D4)	-139.05	59.7003	North America 2504	Film Negative	https://digital.library.cornell.edu/catalog/ss:3322581
3322582	tve_exp1905_144	Hidden Glacier and wash plain	Alaska	Yakutat	Hidden Glacier	26	July	1905	USGS Yaktuat (D4)	-139.05	59.7003	North America 2505	Glass	https://digital.library.cornell.edu/catalog/ss:3322582
3322583	tve_exp1905_145	Hidden Glacier valley. From elevated beach 200 ft above and near sea, large stream on north side.	Alaska	Yakutat	Hidden Glacier	26	July	1905	USGS Yaktuat (D4)	-139.05	59.7003	North America 2506	Film Negative	https://digital.library.cornell.edu/catalog/ss:3322583
3322584	tve_exp1905_146	Wash plain in front of Hidden Glacier, from ice	Alaska	Yakutat	Hidden Glacier	26	July	1905	USGS Yaktuat (D4)	-139.05	59.7003	North America 2530	Film Negative	https://digital.library.cornell.edu/catalog/ss:3322584
3322585	tve_exp1905_147	Hidden Glacier valley. From elevated beach 200 ft above and near sea, just large stream on north side.	Alaska	Yakutat	Hidden Glacier	26	July	1905	USGS Yaktuat (D4)	-139.05	59.7003	North America 2526	Film Negative	https://digital.library.cornell.edu/catalog/ss:3322585
3322586	tve_exp1905_148	Panorama of end of Hidden Glacier from elevated gravel terrace west of deep gully. From Gilbert's site	Alaska	Yakutat	Hidden Glacier	26	July	1905	USGS Yaktuat (D4)	-139.05	59.7003		Film Negative	https://digital.library.cornell.edu/catalog/ss:3322586
3322587	tve_exp1905_149	Panorama of end of Hidden Glacier from elevated gravel terrace west of deep gully. From Gilbert's site	Alaska	Yakutat	Hidden Glacier	26	July	1905	USGS Yaktuat (D4)	-139.05	59.7003	North America 2511	Film Negative	https://digital.library.cornell.edu/catalog/ss:3322587
3322588	tve_exp1905_150	Panorama of end of Hidden Glacier from Gilbert's site	Alaska	Yakutat	Hidden Glacier	26	July	1905	USGS Yaktuat (D4)	-139.05	59.7003		Film Negative	https://digital.library.cornell.edu/catalog/ss:3322588
3952794	tve_exp1905_151_02	Panorama of end of Hidden Glacier, from near Gilbert site	Alaska	Yakutat	Hidden Glacier	26	July	1905	USGS Yaktuat (D4)	-139.05	59.7003	North America 2512	Glass	https://digital.library.cornell.edu/catalog/ss:3952794
3322589	tve_exp1905_151	Panorama of end of Hidden Glacier, from near Gilbert site	Alaska	Yakutat	Hidden Glacier	26	July	1905	USGS Yaktuat (D4)	-139.05	59.7003	North America 2512	Glass	https://digital.library.cornell.edu/catalog/ss:3322589
3322590	tve_exp1905_152	Front of Hidden Glacier, from near Gilbert site	Alaska	Yakutat	Hidden Glacier	26	July	1905	USGS Yaktuat (D4)	-139.05	59.7003	North America 2529	Glass	https://digital.library.cornell.edu/catalog/ss:3322590
3322591	tve_exp1905_153	Lateral moraine on ice, north side of Hidden Glacier. Resting on older overridden gravels	Alaska	Yakutat	Hidden Glacier	26	July	1905	USGS Yaktuat (D4)	-139.05	59.7003		Film Negative	https://digital.library.cornell.edu/catalog/ss:3322591
3919028	tve_exp1905_154_02	Lateral moraine, on ice, north side of Hidden Glacier. Facing unknown.	Alaska	Yakutat	Hidden Glacier	30	July	1905	USGS Yaktuat (D4)	-139.05	59.7003		Film Negative	https://digital.library.cornell.edu/catalog/ss:3919028
3919030	tve_exp1905_154_03	Lateral moraine, on ice, north side of Hidden Glacier. Facing unknown.	Alaska	Yakutat	Hidden Glacier	30	July	1905	USGS Yaktuat (D4)	-139.05	59.7003		Film Negative	https://digital.library.cornell.edu/catalog/ss:3919030
3322592	tve_exp1905_154	Lateral moraine, on ice, north side of Hidden Glacier. Facing unknown.	Alaska	Yakutat	Hidden Glacier	30	July	1905	USGS Yaktuat (D4)	-139.05	59.7003		Film Negative	https://digital.library.cornell.edu/catalog/ss:3322592
3322593	tve_exp1905_155	North margin of Hidden Glacier 1/8 mile from valley wall, overriding gravels. Contact just above man's head	Alaska	Yakutat	Hidden Glacier	26	July	1905	USGS Yaktuat (D4)	-139.05	59.7003	North America 2544	Film Negative	https://digital.library.cornell.edu/catalog/ss:3322593
3322594	tve_exp1905_156	Hidden Glacier, north edge, resting on overridden gravels	Alaska	Yakutat	Hidden Glacier	30	July	1905	USGS Yaktuat (D4)	-139.05	59.7003	North America 2541	Glass	https://digital.library.cornell.edu/catalog/ss:3322594
3322595	tve_exp1905_157	Fan on north side of Hidden Glacier valley, showing high fan(?) and higher terrace of earlier ice stage	Alaska	Yakutat	Hidden Glacier	26	July	1905	USGS Yaktuat (D4)	-139.05	59.7003	North America 2593	Glass	https://digital.library.cornell.edu/catalog/ss:3322595
3322596	tve_exp1905_158	Ice cave of main stream, south side of Hidden Glacier	Alaska	Yakutat	Hidden Glacier	25	July	1905	USGS Yaktuat (D4)	-139.05	59.7003	North America 2521	Film Negative	https://digital.library.cornell.edu/catalog/ss:3322596
3322597	tve_exp1905_159	Hidden glacier stream 1/4 mile from north, looking northeast	Alaska	Yakutat	Hidden Glacier	25	July	1905	USGS Yaktuat (D4)	-139.05	59.7003	North America 2522	Film Negative	https://digital.library.cornell.edu/catalog/ss:3322597
3322598	tve_exp1905_160	North edge of Hidden Glacier, near front of overridden gravels. Canyon cut in overridden gravels	Alaska	Yakutat	Hidden Glacier	26	July	1905	USGS Yaktuat (D4)	-139.05	59.7003		Film Negative	https://digital.library.cornell.edu/catalog/ss:3322598
3322599	tve_exp1905_161	View looking NE from rock mound, across end of Hidden Glacier stream from north side of glacier	Alaska	Yakutat	Hidden Glacier	25	July	1905	USGS Yaktuat (D4)	-139.05	59.7003	North America 2515	Film Negative	https://digital.library.cornell.edu/catalog/ss:3322599
3322600	tve_exp1905_162	Looking west from Hidden Glacier - shows fan and kettles	Alaska	Yakutat	Hidden Glacier	25	July	1905	USGS Yaktuat (D4)	-139.05	59.7003	North America 2531	Glass	https://digital.library.cornell.edu/catalog/ss:3322600
3322601	tve_exp1905_163	Looking south along ice margin of Hidden Glacier	Alaska	Yakutat	Hidden Glacier			1905	USGS Yaktuat (D4)	-139.05	59.7003		Film Negative	https://digital.library.cornell.edu/catalog/ss:3322601
3322602	tve_exp1905_164	Ice of Hidden glacier, looking west	Alaska	Yakutat	Hidden Glacier	26	July	1905	USGS Yaktuat (D4)	-139.05	59.7003	North America 2527	Film Negative	https://digital.library.cornell.edu/catalog/ss:3322602
3322603	tve_exp1905_165	Kettle, about 1 mile from end of Hidden Glacier, on outwash plain	Alaska	Yakutat	Hidden Glacier	25	July	1905	USGS Yaktuat (D4)	-139.05	59.7003		Film Negative	https://digital.library.cornell.edu/catalog/ss:3322603
3322604	tve_exp1905_166	Large (?) 3 yards from front of Hidden Glacier, of ice at Gilbert's	Alaska	Yakutat	Hidden Glacier			1905	USGS Yaktuat (D4)	-139.05	59.7003	North America 2533	Glass	https://digital.library.cornell.edu/catalog/ss:3322604
3322605	tve_exp1905_167	Looking north along edge of front of Hidden Glacier	Alaska	Yakutat	Hidden Glacier	26	July	1905	USGS Yaktuat (D4)	-139.05	59.7003	North America 2528	Glass	https://digital.library.cornell.edu/catalog/ss:3322605
3322606	tve_exp1905_168	Hidden Glacier, from isolated knob on south side of valley	Alaska	Yakutat	Hidden Glacier	25	July	1905	USGS Yaktuat (D4)	-139.05	59.7003	North America 2516	Glass	https://digital.library.cornell.edu/catalog/ss:3322606
3322607	tve_exp1905_169	Hidden Glacier, looking NE from isolated birch knob on south side of valley	Alaska	Yakutat	Hidden Glacier	25	July	1905	USGS Yaktuat (D4)	-139.05	59.7003	North America 2515	Glass	https://digital.library.cornell.edu/catalog/ss:3322607
3322608	tve_exp1905_170	Contour with 190-191. Fallen Glacier from crest of Haenke	Alaska	Yakutat	Fallen Glacier	13	August	1905	USGS Yaktuat (D5)			North America 2330	Glass	https://digital.library.cornell.edu/catalog/ss:3322608
3322609	tve_exp1905_171	South side of Nunatak fiord, showing glacier valley wall	Alaska	Yakutat				1905	USGS Yaktuat (D3)	-139.223	59.8459	Glaciers 2980	Glass	https://digital.library.cornell.edu/catalog/ss:3322609
3322610	tve_exp1905_172	Looking southwest across Atrevida Fan from gravel terrace	Alaska	Yakutat	Atrevida Glacier	21	August	1905	USGS Yaktuat (D5)			North America 1308	Glass	https://digital.library.cornell.edu/catalog/ss:3322610
3952796	tve_exp1905_173_02	Panorama of Turner Glacier from 1/4 mile from southern edge of glacier	Alaska	Yakutat	Turner Glacier	14	August	1905	USGS Mount St. Elias (A5)	-139.626	60.0271		Glass	https://digital.library.cornell.edu/catalog/ss:3952796
3322611	tve_exp1905_173	Panorama of Turner Glacier from 1/4 mile from southern edge of glacier	Alaska	Yakutat	Turner Glacier	14	August	1905	USGS Mount St. Elias (A5)	-139.626	60.0271		Glass	https://digital.library.cornell.edu/catalog/ss:3322611
3952797	tve_exp1905_174_02	Front of Turner Glacier from 525 feet on hillslope near south end of glacier near waterfall	Alaska	Yakutat	Turner Glacier	14	August	1905	USGS Mount St. Elias (A5)	-139.626	60.0271	North America 2355	Glass	https://digital.library.cornell.edu/catalog/ss:3952797
3322612	tve_exp1905_174	Front of Turner Glacier from 525 feet on hillslope near south end of glacier near waterfall	Alaska	Yakutat	Turner Glacier	14	August	1905	USGS Mount St. Elias (A5)	-139.626	60.0271	North America 2355	Glass	https://digital.library.cornell.edu/catalog/ss:3322612
3322613	tve_exp1905_175	Turner Glacier from Gilbert's site. Haenke	Alaska	Yakutat	Turner Glacier	13	August	1905	USGS Mount St. Elias (A5)	-139.626	60.0271	North America 2338	Glass	https://digital.library.cornell.edu/catalog/ss:3322613
3952798	tve_exp1905_176_02	Panorama from Gilbert 1000 ft site	Alaska	Yakutat				1905	USGS Mount St. Elias (A4,A5)			North America 2379	Glass	https://digital.library.cornell.edu/catalog/ss:3952798
3322614	tve_exp1905_176	Panorama from Gilbert 1000 ft site	Alaska	Yakutat				1905	USGS Mount St. Elias (A4,A5)			North America 2379	Glass	https://digital.library.cornell.edu/catalog/ss:3322614
3322615	tve_exp1905_177	Tidal end of Nunatak Glacier from NW by large boulder 100 yds from water edge on alluvial fan	Alaska	Yakutat	Nunatak Glacier	28	July	1905	USGS Yaktuat (D3)	-138.966	59.8104	North America 2474	Glass	https://digital.library.cornell.edu/catalog/ss:3322615
3322616	tve_exp1905_178	Nunatak Glacier from Gilbert's site on south side of fiord	Alaska	Yakutat	Nunatak Glacier	24	July	1905	USGS Yaktuat (D3)	-138.966	59.8104	North America 2489	Glass	https://digital.library.cornell.edu/catalog/ss:3322616
3322617	tve_exp1905_179	Nunatak Glacier from 1410 Feet on crest of Nunatak	Alaska	Yakutat	Nunatak Glacier	27	July	1905	USGS Yaktuat (D3)	-138.966	59.8104	North America 2455	Glass	https://digital.library.cornell.edu/catalog/ss:3322617
3322618	tve_exp1905_180	End of Nunatak Glacier from near Gilbert's site- looking east from cabin	Alaska	Yakutat	Nunatak Glacier	27	July	1905	USGS Yaktuat (D3)	-138.966	59.8104	North America 2466	Glass	https://digital.library.cornell.edu/catalog/ss:3322618
3322619	tve_exp1905_181	Three(?) in a row, in wash plains in front of Hidden Glacier	Alaska	Yakutat	Hidden Glacier	25	July	1905	USGS Yaktuat (D4)	-139.05	59.7003	North America 2532	Glass	https://digital.library.cornell.edu/catalog/ss:3322619
3322620	tve_exp1905_182	Looking west, from 1360 Feet elevation on Nunatak glacier valley	Alaska	Yakutat				1905	USGS Yaktuat (D3)			North America 2551	Glass	https://digital.library.cornell.edu/catalog/ss:3322620
12556256		View (from 2800 ft) from near Cape Enchantment looking n.w. out Russell Fiord	Alaska	Yakutat					USGS Yaktuat (D4)	-139.315	59.8516	north american #2214	Film Negative	https://digital.library.cornell.edu/catalog/ss:12556256
12556258		Hubbard Glacier from hill just south, J. Turner glacier	Alaska	Yakutat	Hubbard Glacier				USGS Mount St. Elias (A4,A5)	-139.466	60.0247	north america #2859	Glass	https://digital.library.cornell.edu/catalog/ss:12556258
12559230	tve_exp1905_185_02	Front of Hubbard Glacier from east ends nearly Gilbert's site	Alaska	Yakutat	Hubbard Glacier				USGS Mount St. Elias (A4,A5)	-139.466	60.0247	north america #2392	Glass	https://digital.library.cornell.edu/catalog/ss:12559230
12556259	tve_exp1905_185	Front of Hubbard Glacier from east ends nearly Gilbert's site	Alaska	Yakutat	Hubbard Glacier				USGS Mount St. Elias (A4,A5)	-139.466	60.0247	north america #2392	Glass	https://digital.library.cornell.edu/catalog/ss:12556259
12556260		Panorama with glacier in east side. Russell Fiord	Alaska	Yakutat					USGS Yaktuat (D4)				Film Negative	https://digital.library.cornell.edu/catalog/ss:12556260
2601207	tve_exp1906_001	Panorama (27-29) of Hubbard and Turner Glaciers from Gilbert's site on summit of Haenke Isl.	Alaska	Yakutat	Turner Glacier	24	June	1906	USGS Mount St. Elias (A4,A5)	-139.607	60.0573		Film Negative	https://digital.library.cornell.edu/catalog/ss:2601207
2601208	tve_exp1906_002	Panorama (27-29) of Hubbard and Turner Glaciers from Gilbert's site on summit of Haenke Isl.	Alaska	Yakutat	Turner Glacier	25	June	1906	USGS Mount St. Elias (A4,A5)	-139.607	60.0573	North America 2342	Film Negative	https://digital.library.cornell.edu/catalog/ss:2601208
2601209	tve_exp1906_003	Panorama (27-29) of Hubbard and Turner Glaciers from Gilbert's site on summit of Haenke Isl.	Alaska	Yakutat	Turner Glacier	27	June	1906	USGS Mount St. Elias (A4,A5)	-139.607	60.0573		Film Negative	https://digital.library.cornell.edu/catalog/ss:2601209
2600802	tve_exp1906_004	Hubbard Glacier from N.E. end of crest of Haenke Isl. - Also late development of vegetation	Alaska	Yakutat	Hubbard Glacier	27	June	1906	USGS Mount St. Elias (A4,A5)	-139.607	60.0573		Film Negative	https://digital.library.cornell.edu/catalog/ss:2600802
3321847	tve_exp1906_005	Folds in Yakutat Series - east side of Haenke Island In elevated diff. From elevated beach	Alaska	Yakutat		28	June	1906	USGS Yaktuat (D5)	-139.607	60.0573	odd size (4.75x5.25)	Film Negative	https://digital.library.cornell.edu/catalog/ss:3321847
3321848	tve_exp1906_006	Stranded iceberg with embedded and suspended debris - on beach at Indian Camp	Alaska	Yakutat		28	June	1906	USGS Yaktuat (D5)	-139.607	59.9037	odd size (4.75x5.25), North America 2573	Film Negative	https://digital.library.cornell.edu/catalog/ss:3321848
3321849	tve_exp1906_007	West shore of Bay, offsite Indian Camp. Ice floe, stranded bergs. Dissected fan of Camp 2 site. Mt. Seattle in distance.	Alaska	Yakutat		28	June	1906	USGS Yaktuat (D5)	-139.607	59.9037	odd size (4.75x5.25)	Film Negative	https://digital.library.cornell.edu/catalog/ss:3321849
3321850	tve_exp1906_008	Floral zone on uplifted strand, campsite 2 on westside offsite Indian Camp. Notched foreland = rock marginal gorges in distance.	Alaska	Yakutat		28	June	1906	USGS Yaktuat (D5)	-139.607	59.9037	odd size (4.75x5.25)	Film Negative	https://digital.library.cornell.edu/catalog/ss:3321850
3321851	tve_exp1906_009	Talus slope on west side of Disenchantment Bay near Turner Glacier.	Alaska	Yakutat		29	June	1906	USGS Mount St. Elias (A5)	-139.608	59.9978	odd size (4.75x5.25)	Film Negative	https://digital.library.cornell.edu/catalog/ss:3321851
3321852	tve_exp1906_010	Panorama (38-40) of Turner and Hubbard Glaciers from mountnain slope southeast of Turner Glacier, west side of Disenchantment Bay	Alaska	Yakutat	Turner Glacier	29	June	1906	USGS Mount St. Elias (A4,A5)	-139.626	60.0271	odd size (4.75x5.25)	Film Negative	https://digital.library.cornell.edu/catalog/ss:3321852
3321853	tve_exp1906_011	Panorama (38-40) of Turner and Hubbard Glaciers from mountnain slope southeast of Turner Glacier, west side of Disenchantment Bay	Alaska	Yakutat	Turner Glacier	29	June	1906	USGS Mount St. Elias (A4,A5)	-139.626	60.0271	odd size (4.75x5.25)	Film Negative	https://digital.library.cornell.edu/catalog/ss:3321853
3321854	tve_exp1906_012	Panorama (38-40) of Turner and Hubbard Glaciers from mountnain slope southeast of Turner Glacier, west side of Disenchantment Bay	Alaska	Yakutat	Turner Glacier	1	July	1906	USGS Mount St. Elias (A4,A5)	-139.626	60.0271	odd size (4.75x5.25)	Film Negative	https://digital.library.cornell.edu/catalog/ss:3321854
3321855	tve_exp1906_013	South face of Galliano Glacier. Torn trees of destroyed forest, in moraine.	Alaska	Yakutat	Galliano Glacier	1	July	1906	USGS Yaktuat (D5)	-139.715	59.9722	odd size (4.75x5.25)	Film Negative	https://digital.library.cornell.edu/catalog/ss:3321855
3321856	tve_exp1906_014	Crevassed Atrevida Glacier, from snow slope on west slope of Ampitheater Butte	Alaska	Yakutat	Atrevida Glacier	3	July	1906	USGS Yaktuat (D5)	-139.787	59.9709	odd size (4.75x5.25), North America 2258	Film Negative	https://digital.library.cornell.edu/catalog/ss:3321856
3321857	tve_exp1906_015	Front of Atrevida Glacier with Dalton Creek issuing	Alaska	Yakutat	Atrevida Glacier	3	July	1906	USGS Yaktuat (D5)	-139.787	59.9709	odd size (4.75x5.25), North America 2255	Film Negative	https://digital.library.cornell.edu/catalog/ss:3321857
3321858	tve_exp1906_016	Ice pack in front of Turner Glacier	Alaska	Yakutat	Turner Glacier	3	July	1906	USGS Mount St. Elias (A5)	-139.626	60.0271	odd size (4.75x5.25)	Film Negative	https://digital.library.cornell.edu/catalog/ss:3321858
3321859	tve_exp1906_017	Front of Turner Glacier, from small hill, south of glacier on west side of Disenchantment Bay	Alaska	Yakutat	Turner Glacier	3	July	1906	USGS Mount St. Elias (A5)	-139.626	60.0271	odd size (4.75x5.25), North America 2352	Film Negative	https://digital.library.cornell.edu/catalog/ss:3321859
2601187	tve_exp1906_018	Panorama (52-57) of Turner and Hubbard Glaciers from 1000-foot station on Gilbert Point	Alaska	Yakutat	Turner Glacier	3	July	1906	USGS Mount St. Elias (A4,A5)	-139.626	60.0271		Film Negative	https://digital.library.cornell.edu/catalog/ss:2601187
2601188	tve_exp1906_019	Panorama (52-57) of Turner and Hubbard Glaciers from 1000-foot station on Gilbert Point	Alaska	Yakutat	Turner Glacier	3	July	1906	USGS Mount St. Elias (A4,A5)	-139.626	60.0271		Film Negative	https://digital.library.cornell.edu/catalog/ss:2601188
2601189	tve_exp1906_020	Panorama (52-57) of Turner and Hubbard Glaciers from 1000-foot station on Gilbert Point	Alaska	Yakutat	Turner Glacier	3	July	1906	USGS Mount St. Elias (A4,A5)	-139.626	60.0271		Film Negative	https://digital.library.cornell.edu/catalog/ss:2601189
2601190	tve_exp1906_021	Panorama (52-57) of Turner and Hubbard Glaciers from 1000-foot station on Gilbert Point	Alaska	Yakutat	Turner Glacier	3	July	1906	USGS Mount St. Elias (A4,A5)	-139.626	60.0271		Film Negative	https://digital.library.cornell.edu/catalog/ss:2601190
2601191	tve_exp1906_022	Panorama (52-57) of Turner and Hubbard Glaciers from 1000-foot station on Gilbert Point	Alaska	Yakutat	Turner Glacier	3	July	1906	USGS Mount St. Elias (A4,A5)	-139.626	60.0271		Film Negative	https://digital.library.cornell.edu/catalog/ss:2601191
2601192	tve_exp1906_023	Panorama (52-57) of Turner and Hubbard Glaciers from 1000-foot station on Gilbert Point	Alaska	Yakutat	Turner Glacier	4	July	1906	USGS Mount St. Elias (A4,A5)	-139.626	60.0271		Film Negative	https://digital.library.cornell.edu/catalog/ss:2601192
3321866	tve_exp1906_024	Hubbard Glacier front from the water	Alaska	Yakutat	Hubbard Glacier	4	July	1906	USGS Mount St. Elias (A4,A5)	-139.466	60.0247	odd size (4.75x5.25)	Film Negative	https://digital.library.cornell.edu/catalog/ss:3321866
3321867	tve_exp1906_025	Hubbard Glacier front from the water	Alaska	Yakutat	Hubbard Glacier	4	July	1906	USGS Mount St. Elias (A4,A5)	-139.466	60.0247	odd size (4.75x5.25)	Film Negative	https://digital.library.cornell.edu/catalog/ss:3321867
3321868	tve_exp1906_026	Hubbard Glacier front from the water	Alaska	Yakutat	Hubbard Glacier	4	July	1906	USGS Mount St. Elias (A4,A5)	-139.466	60.0247	odd size (4.75x5.25)	Film Negative	https://digital.library.cornell.edu/catalog/ss:3321868
3321869	tve_exp1906_027	Osier Island camp on nose of Gilbert Point Butler rowing from Osier Island	Alaska	Yakutat		4	July	1906	USGS Yaktuat (D4)	-139.471	59.9964	odd size (4.75x5.25)	Film Negative	https://digital.library.cornell.edu/catalog/ss:3321869
2601197	tve_exp1906_028	Panorama (62-67) of Turner and Hubbard Glaciers from Russell's site, Osier Isl.	Alaska	Yakutat	Turner Glacier	4	July	1906	USGS Mount St. Elias (A4,A5)	139.626	60.0271		Film Negative	https://digital.library.cornell.edu/catalog/ss:2601197
2601198	tve_exp1906_029	Panorama (62-67) of Turner and Hubbard Glaciers from Russell's Osier Isl. site.	Alaska	Yakutat	Turner Glacier	4	July	1906	USGS Mount St. Elias (A4,A5)	139.626	60.0271		Film Negative	https://digital.library.cornell.edu/catalog/ss:2601198
2601199	tve_exp1906_030	Panorama (62-67) of Turner and Hubbard Glaciers from Russell's Osier Isl. site.	Alaska	Yakutat	Turner Glacier	4	July	1906	USGS Mount St. Elias (A4,A5)	139.626	60.0271		Film Negative	https://digital.library.cornell.edu/catalog/ss:2601199
2601200	tve_exp1906_031	Panorama (62-67) of Turner and Hubbard Glaciers from Russell's Osier Isl. site.	Alaska	Yakutat	Hubbard Glacier	5	July	1906	USGS Mount St. Elias (A4,A5)	-139.466	60.0247		Film Negative	https://digital.library.cornell.edu/catalog/ss:2601200
2601201	tve_exp1906_032	Panorama (62-67) of Turner and Hubbard Glaciers from Russell's Osier Isl. site.	Alaska	Yakutat	Hubbard Glacier	5	July	1906	USGS Mount St. Elias (A4,A5)	-139.466	60.0247		Film Negative	https://digital.library.cornell.edu/catalog/ss:2601201
2601202	tve_exp1906_033	Panorama (62-67) of Turner and Hubbard Glaciers from Russell's Osier Isl. site.	Alaska	Yakutat	Hubbard Glacier	5	July	1906	USGS Mount St. Elias (A4,A5)	-139.466	60.0247		Film Negative	https://digital.library.cornell.edu/catalog/ss:2601202
2601263	tve_exp1906_034	Variegated Glacier from Osier Isl.	Alaska	Yakutat	Variegated Glacier	5	July	1906	USGS Yaktuat (D4)	-139.287	59.9999		Film Negative	https://digital.library.cornell.edu/catalog/ss:2601263
3321877	tve_exp1906_035	Faults on Gannett Nunatak looking west	Alaska	Yakutat		6	July	1906	USGS Yaktuat (D3)	-139.033	59.8261	odd size (4.75x5.25)	Film Negative	https://digital.library.cornell.edu/catalog/ss:3321877
9406304	tve_exp1906_035b	Faults on Gannett Nunatak looking west	Alaska	Yakutat		6	July	1906	USGS Yaktuat (D3)	-139.033	59.8261	odd size (4.75x5.25)	Film Negative	https://digital.library.cornell.edu/catalog/ss:9406304
3321878	tve_exp1906_036	Cascading Glacier from crest of Gannett Nunatak	Alaska	Yakutat	Cascading Glacier	6	July	1906	USGS Yaktuat (D3)	-139.061	59.7988	odd size (4.75x5.25)	Film Negative	https://digital.library.cornell.edu/catalog/ss:3321878
3321879	tve_exp1906_037	Front of Nunatak Glacier from crest of Gannett Nunatak	Alaska	Yakutat	Nunatak Glacier	10	July	1906	USGS Yaktuat (D3)	-138.966	59.8104	odd size (4.75x5.25)	Film Negative	https://digital.library.cornell.edu/catalog/ss:3321879
3321880	tve_exp1906_038	Hanging valley nearest Gannett Nunatak, on south side of fiord, from water	Alaska	Yakutat		10	July	1906	USGS Yaktuat (D3)	-139.033	59.8261	odd size (4.75x5.25), Glaciers 2983	Film Negative	https://digital.library.cornell.edu/catalog/ss:3321880
3321881	tve_exp1906_039	Moonrise (at 11 PM) at Camp South of Russell Cove	Alaska	Yakutat		10	July	1906				odd size (4.75x5.25)	Film Negative	https://digital.library.cornell.edu/catalog/ss:3321881
3321882	tve_exp1906_040	Moonrise (at 11 PM) at Camp South of Russell Cove	Alaska	Yakutat		10	July	1906				odd size (4.75x5.25)	Film Negative	https://digital.library.cornell.edu/catalog/ss:3321882
3321883	tve_exp1906_041	Hubbard Glacier from fiord	Alaska	Yakutat	Hubbard Glacier	10	July	1906	USGS Mount St. Elias (A4,A5)	-139.466	60.0247	odd size (4.75x5.25)	Film Negative	https://digital.library.cornell.edu/catalog/ss:3321883
3321884	tve_exp1906_042	Hubbard Glacier front from water	Alaska	Yakutat	Hubbard Glacier	10	July	1906	USGS Mount St. Elias (A4,A5)	-139.466	60.0247	odd size (4.75x5.25)	Film Negative	https://digital.library.cornell.edu/catalog/ss:3321884
3321885	tve_exp1906_043	Hubbard Glacier front from water	Alaska	Yakutat	Hubbard Glacier	10	July	1906	USGS Mount St. Elias (A4,A5)	-139.466	60.0247	odd size (4.75x5.25)	Film Negative	https://digital.library.cornell.edu/catalog/ss:3321885
3321886	tve_exp1906_044	Hubbard Glacier front from water	Alaska	Yakutat	Hubbard Glacier	10	July	1906	USGS Mount St. Elias (A4,A5)	-139.466	60.0247	odd size (4.75x5.25)	Film Negative	https://digital.library.cornell.edu/catalog/ss:3321886
3321887	tve_exp1906_045	Hubbard Glacier front from water	Alaska	Yakutat	Hubbard Glacier	10	July	1906	USGS Mount St. Elias (A4,A5)	-139.466	60.0247	odd size (4.75x5.25)	Film Negative	https://digital.library.cornell.edu/catalog/ss:3321887
3321888	tve_exp1906_046	Hubbard Glacier front from water	Alaska	Yakutat	Hubbard Glacier	10	July	1906	USGS Mount St. Elias (A4,A5)	-139.466	60.0247	odd size (4.75x5.25), North America 2395	Film Negative	https://digital.library.cornell.edu/catalog/ss:3321888
3321889	tve_exp1906_047	Hubbard Glacier front from water	Alaska	Yakutat	Hubbard Glacier	10	July	1906	USGS Mount St. Elias (A4,A5)	-139.466	60.0247	odd size (4.75x5.25)	Film Negative	https://digital.library.cornell.edu/catalog/ss:3321889
3321890	tve_exp1906_048	Hubbard Glacier front from water	Alaska	Yakutat	Hubbard Glacier	10	July	1906	USGS Mount St. Elias (A4,A5)	-139.466	60.0247	odd size (4.75x5.25)	Film Negative	https://digital.library.cornell.edu/catalog/ss:3321890
3321891	tve_exp1906_049	Hubbard Glacier front from water	Alaska	Yakutat	Hubbard Glacier	10	July	1906	USGS Mount St. Elias (A4,A5)	-139.466	60.0247	odd size (4.75x5.25)	Film Negative	https://digital.library.cornell.edu/catalog/ss:3321891
3321892	tve_exp1906_050	Hubbard Glacier front from water	Alaska	Yakutat	Hubbard Glacier	10	July	1906	USGS Mount St. Elias (A4,A5)	-139.466	60.0247	odd size (4.75x5.25)	Film Negative	https://digital.library.cornell.edu/catalog/ss:3321892
3321893	tve_exp1906_051	Hubbard Glacier front from water	Alaska	Yakutat	Hubbard Glacier	10	July	1906	USGS Mount St. Elias (A4,A5)	-139.466	60.0247	odd size (4.75x5.25)	Film Negative	https://digital.library.cornell.edu/catalog/ss:3321893
3321894	tve_exp1906_052	Hubbard Glacier front from the water	Alaska	Yakutat	Hubbard Glacier	10	July	1906	USGS Mount St. Elias (A4,A5)	-139.466	60.0247	odd size (4.75x5.25)	Film Negative	https://digital.library.cornell.edu/catalog/ss:3321894
3321895	tve_exp1906_053	Gilbert Point from the water, Looking southeast	Alaska	Yakutat					USGS Yaktuat (D4)	-139.485	59.9901	odd size (4.75x5.25), North America 2224	Film Negative	https://digital.library.cornell.edu/catalog/ss:3321895
3321896	tve_exp1906_054	Mt. Vancouver from Disenchantment Bay	Alaska	Yakutat		15	July	1906	USGS Mount St. Elias (A5)	-139.69	60.3264	odd size (4.75x5.25)	Film Negative	https://digital.library.cornell.edu/catalog/ss:3321896
3321897	tve_exp1906_055	Perched iceberg in Disenchantment Bay	Alaska	Yakutat		15	July	1906		-139.564	59.9874	odd size (4.75x5.25)	Film Negative	https://digital.library.cornell.edu/catalog/ss:3321897
3321898	tve_exp1906_056	Perched icebergs in Disenchantment Bay	Alaska	Yakutat		15	July	1906		-139.564	59.9874	odd size (4.75x5.25), North America 2571	Film Negative	https://digital.library.cornell.edu/catalog/ss:3321898
3321899	tve_exp1906_057	Sunrise (looking NE) from west shore of Yakutat Bay at Maroon camp	Alaska	Yakutat		15	July	1906				odd size (4.75x5.25)	Film Negative	https://digital.library.cornell.edu/catalog/ss:3321899
3321900	tve_exp1906_058	Wood in gravels on north side of Hell Gulch along margin of Hayden Glacier	Alaska	Yakutat		15	July	1906	USGS Mount St. Elias (A6)	-140.025	59.988	odd size (4.75x5.25), North America 2615	Film Negative	https://digital.library.cornell.edu/catalog/ss:3321900
3321901	tve_exp1906_059	Looking up Hell Gulch. Gravels on right. Hayden Glacier on left	Alaska	Yakutat	Hayden Glacier	16	July	1906	USGS Mount St. Elias (A6)	-140.025	59.988	odd size (4.75x5.25), North America 2612	Film Negative	https://digital.library.cornell.edu/catalog/ss:3321901
3321902	tve_exp1906_060	In Hell Gulch. Stratification of Hayden Glacier, overriding gravels.	Alaska	Yakutat	Hayden Glacier	16	July	1906	USGS Mount St. Elias (A6)	-140.025	59.988	odd size (4.75x5.25), North America 2613	Film Negative	https://digital.library.cornell.edu/catalog/ss:3321902
3321903	tve_exp1906_061	Looking down Hell Gulch. Hayden Glacier on right. Gravels on left	Alaska	Yakutat	Hayden Glacier	16	July	1906	USGS Mount St. Elias (A6)	-140.025	59.988	odd size (4.75x5.25), North America 2610	Film Negative	https://digital.library.cornell.edu/catalog/ss:3321903
3321904	tve_exp1906_062	Gravels on north side of Hell Gulch. Dissection by lateral stream	Alaska	Yakutat		16	July	1906	USGS Mount St. Elias (A6)	-140.025	59.988	odd size (4.75x5.25), North America 2614	Film Negative	https://digital.library.cornell.edu/catalog/ss:3321904
3321905	tve_exp1906_063	Lucia stream, one mile from junction with Kwik. Looking up stream. High level terrace, stream, and rock defense	Alaska	Yakutat		16	July	1906	USGS Yakutat (D6)	-139.915	59.9589	odd size (4.75x5.25), Rivers 1795	Film Negative	https://digital.library.cornell.edu/catalog/ss:3321905
3321906	tve_exp1906_064	Lucia stream, 1 mile from junction with Kwik. Looking down stream over level terrace.	Alaska	Yakutat		16	July	1906	USGS Yakutat (D6)	-139.915	59.9589	odd size (4.75x5.25)	Film Negative	https://digital.library.cornell.edu/catalog/ss:3321906
3321907	tve_exp1906_065	Lucia stream, 1 mile above junction junction with Kwik. Rock defense terrace.	Alaska	Yakutat		16	July	1906	USGS Yakutat (D6)	-139.915	59.9589	odd size (4.75x5.25)	Film Negative	https://digital.library.cornell.edu/catalog/ss:3321907
3321908	tve_exp1906_066	Lucia stream, 1 mile above junction with Kwik. Looking downstream over rock defense and defended terrace	Alaska	Yakutat		18	July	1906	USGS Yakutat (D6)	-139.915	59.9589	odd size (4.75x5.25)	Film Negative	https://digital.library.cornell.edu/catalog/ss:3321908
3321909	tve_exp1906_067	Lucia stream 1.5 miles up. Looking downstream to show old gorge being excavated	Alaska	Yakutat		19	July	1906	USGS Yakutat (D6)	-139.915	59.9589	odd size (4.75x5.25)	Film Negative	https://digital.library.cornell.edu/catalog/ss:3321909
3321910	tve_exp1906_068	View looking east south east from southeast end of Floral Hills over alder covered end of Lucia Glacier.	Alaska	Yakutat	Lucia Glacier	19	July	1906	USGS Yakutat (D6)	-139.892	60.0059	odd size (4.75x5.25), North America 2281	Film Negative	https://digital.library.cornell.edu/catalog/ss:3321910
3321911	tve_exp1906_069	Looking southeast across lower end of Lucia Glacier from south end of Floral Hills	Alaska	Yakutat	Lucia Glacier	19	July	1906	USGS Yakutat (D6)	-139.892	60.0059	odd size (4.75x5.25), North America 2282	Film Negative	https://digital.library.cornell.edu/catalog/ss:3321911
3321912	tve_exp1906_070	Looking down Hell Gulch. Rich and Konnin in distance. Hayden Glacier on right, gravel bluffs on left	Alaska	Yakutat	Hayden Glacier	19	July	1906	USGS Yakutat (D6)	-140.025	59.988	odd size (4.75x5.25), North America 2611	Film Negative	https://digital.library.cornell.edu/catalog/ss:3321912
3321913	tve_exp1906_071	Hayden Glacier. Looking over surface to show hollow between it and the Marvine. Looking southwest.	Alaska	Yakutat	Hayden Glacier		June	1906	USGS Mount St. Elias (A6)	-140.025	59.988	odd size (4.75x5.25), Glaciers 658	Film Negative	https://digital.library.cornell.edu/catalog/ss:3321913
3321914	tve_exp1906_072	Glacier table on Hayden glacier. Poulter	Alaska	Yakutat	Hayden Glacier			1906	USGS Yakutat (D6)	-140.025	59.988	odd size (4.75x5.25)	Film Negative	https://digital.library.cornell.edu/catalog/ss:3321914
3321915	tve_exp1906_073	West side of Hayden Glacier. Slumping ice where Kwik enters. Looking west out to Hitchcock Hills.	Alaska	Yakutat	Hayden Glacier	29	July	1906	USGS Yakutat (D6)	-140.025	59.988	odd size (4.75x5.25), Glaciers 674	Film Negative	https://digital.library.cornell.edu/catalog/ss:3321915
3321916	tve_exp1906_074	West side of Hayden Glacier. Slumping glacier where Kwik enters. Looking west across Blossom Island	Alaska	Yakutat	Hayden Glacier	29	July	1906	USGS Yakutat (D6)	-140.025	59.988	odd size (4.75x5.25), Glaciers 672	Film Negative	https://digital.library.cornell.edu/catalog/ss:3321916
3321917	tve_exp1906_075	Alligned spurs. Inside passage.	Alaska	Southern Panhandle		29	July	1906				North America 2019	Film Negative	https://digital.library.cornell.edu/catalog/ss:3321917
3321918	tve_exp1906_076	Inside Passage	Alaska	Southern Panhandle		29	July	1906					Film Negative	https://digital.library.cornell.edu/catalog/ss:3321918
3321919	tve_exp1906_077	Crevassing along east margin of Marvine Glacier	Alaska	Yakutat	Marvine Glacier	29	July	1906	USGS Mount St. Elias (A6)	-140.203	60.0432	Glaciers 666	Film Negative	https://digital.library.cornell.edu/catalog/ss:3321919
3321920	tve_exp1906_078	Crevassing along east margin of Marvine Glacier	Alaska	Yakutat	Marvine Glacier	29	July	1906	USGS Mount St. Elias (A6)	-140.203	60.0432		Film Negative	https://digital.library.cornell.edu/catalog/ss:3321920
3321921	tve_exp1906_079	Crevasses on northern edge of Marvine Glacier	Alaska	Yakutat	Marvine Glacier	29	July	1906	USGS Mount St. Elias (A6)	-140.203	60.0432	Glaciers 665	Film Negative	https://digital.library.cornell.edu/catalog/ss:3321921
3321922	tve_exp1906_080	Marvine Glacier, northern edge crevasses	Alaska	Yakutat	Marvine Glacier	29	July	1906	USGS Mount St. Elias (A6)	-140.203	60.0432	Glaciers 664	Film Negative	https://digital.library.cornell.edu/catalog/ss:3321922
3321923	tve_exp1906_081	Crevasses and moraine - northern edge of Marvine Glacier	Alaska	Yakutat	Marvine Glacier	29	July	1906	USGS Mount St. Elias (A6)	-140.203	60.0432		Film Negative	https://digital.library.cornell.edu/catalog/ss:3321923
3321924	tve_exp1906_082	General view of crevasses on northern edge of Marvine Glacier	Alaska	Yakutat	Marvine Glacier	29	July	1906	USGS Mount St. Elias (A6)	-140.203	60.0432	Glaciers 663	Film Negative	https://digital.library.cornell.edu/catalog/ss:3321924
3321925	tve_exp1906_083	Crevassed margin of Marvine Glacier. Panorama 148-149.	Alaska	Yakutat	Marvine Glacier		July	1906	USGS Mount St. Elias (A6)	-140.203	60.0432		Film Negative	https://digital.library.cornell.edu/catalog/ss:3321925
3321926	tve_exp1906_084	Crevassed Marvine Glacier from east margin. Panorama 148-149.	Alaska	Yakutat	Marvine Glacier	29	July	1906	USGS Mount St. Elias (A6)	-140.203	60.0432		Film Negative	https://digital.library.cornell.edu/catalog/ss:3321926
3321927	tve_exp1906_085	Edge of Marvine Glacier showing overthrust. Blossom Island	Alaska	Yakutat	Marvine Glacier	29	July	1906	USGS Mount St. Elias (A6)	-140.203	60.0432		Film Negative	https://digital.library.cornell.edu/catalog/ss:3321927
3321928	tve_exp1906_086	Eastern margin of Marvine Glacier showing deposit. Blossom Island	Alaska	Yakutat	Marvine Glacier	29	July	1906	USGS Mount St. Elias (A6)	-140.203	60.0432		Film Negative	https://digital.library.cornell.edu/catalog/ss:3321928
3321929	tve_exp1906_087	Panorama from Blossom Island Up Marvine. Wide angle panorama 152-155.	Alaska	Yakutat	Marvine Glacier	30	July	1906	USGS Mount St. Elias (A6)	-140.203	60.0432		Film Negative	https://digital.library.cornell.edu/catalog/ss:3321929
3321930	tve_exp1906_088	Panorama of Malaspina Glacier from crest of Blossom Island Wide angle panorama 152-155.	Alaska	Yakutat	Malaspina Glacier	30	July	1906	USGS Yakutat (D7), Mount St. Elias (A7)	-140.529	1871772 59.93292675514918		Film Negative	https://digital.library.cornell.edu/catalog/ss:3321930
3321931	tve_exp1906_089	Panorama of Malaspina Glacier from crest of Blossom Island Wide angle panorama 152-155.	Alaska	Yakutat	Malaspina Glacier	30	July	1906	USGS Yakutat (D7), Mount St. Elias (A7)	-140.529	1871772 59.93292675514918		Film Negative	https://digital.library.cornell.edu/catalog/ss:3321931
3321932	tve_exp1906_090	Panorama (eastern member) of Malaspina Glacier from crest of Blossom Island Wide angle panorama 152-155.	Alaska	Yakutat	Malaspina Glacier	30	July	1906	USGS Yakutat (D7), Mount St. Elias (A7)	-140.529	1871772 59.93292675514918		Film Negative	https://digital.library.cornell.edu/catalog/ss:3321932
3321933	tve_exp1906_091	Crevassed Marvine Glacier from crest of Blossom Island Panorama 156-159.	Alaska	Yakutat	Marvine Glacier	29	July	1906	USGS Mount St. Elias (A6)	-140.203	60.0432		Film Negative	https://digital.library.cornell.edu/catalog/ss:3321933
2600882	tve_exp1906_092	Malaspina Glacier from crest of Blossom Isl. Panorama 156-159.	Alaska	Yakutat	Malaspina Glacier		July	1906	USGS Yakutat (D7), Mount St. Elias (A7)	-140.529	1871772 59.93292675514918		Film Negative	https://digital.library.cornell.edu/catalog/ss:2600882
2600883	tve_exp1906_093	Malaspina Glacier from crest of Blossom Isl. Panorama 156-159.	Alaska	Yakutat	Malaspina Glacier	30	July	1906	USGS Yakutat (D7), Mount St. Elias (A7)	-140.529	1871772 59.93292675514918	Glaciers 660	Film Negative	https://digital.library.cornell.edu/catalog/ss:2600883
2600884	tve_exp1906_094	Malaspina Glacier from crest of Blossom Isl. Panorama 156-159.	Alaska	Yakutat	Malaspina Glacier	30	July	1906	USGS Yakutat (D7), Mount St. Elias (A7)	-140.529	1871772 59.93292675514918	Glaciers 659	Film Negative	https://digital.library.cornell.edu/catalog/ss:2600884
3321937	tve_exp1906_095	Long focus picture of Marvine Glacier from crest of Blossom Island	Alaska	Yakutat	Marvine Glacier	30	July	1906	USGS Mount St. Elias (A6)	-140.203	60.0432	Glaciers 662	Film Negative	https://digital.library.cornell.edu/catalog/ss:3321937
9471503	tve_exp1906_096_02	Crevassed Marvine Glacier. Long focus picture from Blossom Island Looking NW.	Alaska	Yakutat	Marvine Glacier		July	1906	USGS Mount St. Elias (A6)	-140.203	60.0432		Film Negative	https://digital.library.cornell.edu/catalog/ss:9471503
3321938	tve_exp1906_096	Crevassed Marvine Glacier. Long focus picture from Blossom Island Looking NW.	Alaska	Yakutat	Marvine Glacier		July	1906	USGS Mount St. Elias (A6)	-140.203	60.0432		Film Negative	https://digital.library.cornell.edu/catalog/ss:3321938
9471504	tve_exp1906_097_02	Panorama (two photos) of crevassed Marvine Glacier from north west of Blossom Island 162-163.	Alaska	Yakutat	Marvine Glacier	29	July	1906	USGS Mount St. Elias (A6)	-140.203	60.0432		Film Negative	https://digital.library.cornell.edu/catalog/ss:9471504
3321939	tve_exp1906_097	Panorama (two photos) of crevassed Marvine Glacier from north west of Blossom Island 162-163.	Alaska	Yakutat	Marvine Glacier	29	July	1906	USGS Mount St. Elias (A6)	-140.203	60.0432		Film Negative	https://digital.library.cornell.edu/catalog/ss:3321939
3321940	tve_exp1906_098	Panorama (two photos) of crevassed Marvine Glacier from northwest of Blossom Island 162-163.	Alaska	Yakutat	Marvine Glacier		July	1906	USGS Mount St. Elias (A6)	-140.203	60.0432		Film Negative	https://digital.library.cornell.edu/catalog/ss:3321940
3321941	tve_exp1906_099	Long focus picture of crevassed Marvine Glacier - northwest of Blossom Island	Alaska	Yakutat	Marvine Glacier		July	1906	USGS Mount St. Elias (A6)	-140.203	60.0432	Glaciers 661	Film Negative	https://digital.library.cornell.edu/catalog/ss:3321941
9471505	tve_exp1906_100_02	Long focus picture of crevassed Marvine NW of Blossom Island	Alaska	Yakutat	Marvine Glacier	29	July	1906	USGS Mount St. Elias (A6)	-140.203	60.0432		Film Negative	https://digital.library.cornell.edu/catalog/ss:9471505
3321942	tve_exp1906_100	Long focus picture of crevassed Marvine NW of Blossom Island	Alaska	Yakutat	Marvine Glacier	29	July	1906	USGS Mount St. Elias (A6)	-140.203	60.0432		Film Negative	https://digital.library.cornell.edu/catalog/ss:3321942
3321943	tve_exp1906_101	Blossom Island lake and Hayden Glacier from north side of Marvine Glacier	Alaska	Yakutat	Hayden Glacier			1906	USGS Yaktuat (D6), Mount St. Elias (A6)	-140.115	59.9997		Film Negative	https://digital.library.cornell.edu/catalog/ss:3321943
3321944	tve_exp1906_102	Blossom Island lake Floral Hills, Floral Pass, Hayden Glacier, from west margin of Marvine Glacier. Panorama 167-168	Alaska	Yakutat	Hayden Glacier	29	July	1906	USGS Yaktuat (D6), Mount St. Elias (A6)	-140.115	59.9997		Film Negative	https://digital.library.cornell.edu/catalog/ss:3321944
3321945	tve_exp1906_103	Marginal moraine and deposits along eastern margin of Marvine Glacier. Panorama 167-168.	Alaska	Yakutat	Marvine Glacier	30	July	1906	USGS Mount St. Elias (A6)	-140.115	59.9997		Film Negative	https://digital.library.cornell.edu/catalog/ss:3321945
3321946	tve_exp1906_104	Blossom Island lake, Hayden Glacier, Floral Hills from east margin of Marvine Glacier	Alaska	Yakutat	Hayden Glacier	30	July	1906	USGS Yaktuat (D6), Mount St. Elias (A6)	-140.115	59.9997		Film Negative	https://digital.library.cornell.edu/catalog/ss:3321946
3321947	tve_exp1906_105	Blossom Island lake from east margin of Marvine Glacier. Hayden Glacier and Floral Hills in distance	Alaska	Yakutat	Hayden Glacier	30	July	1906	USGS Yaktuat (D6), Mount St. Elias (A6)	-140.115	59.9997		Film Negative	https://digital.library.cornell.edu/catalog/ss:3321947
3321948	tve_exp1906_106	Glaciated valley and Blossom Island Glacier. Looking east from crest of Blossom Island	Alaska	Yakutat			July	1906	USGS Mount St. Elias (A6)	-140.115	59.9997		Film Negative	https://digital.library.cornell.edu/catalog/ss:3321948
3321949	tve_exp1906_107	Marginal channel and moraine near crest of Blossom Island	Alaska	Yakutat			July	1906	USGS Mount St. Elias (A6)	-140.115	59.9997	North America 2602	Film Negative	https://digital.library.cornell.edu/catalog/ss:3321949
3321950	tve_exp1906_108	Russell's camp site. Blossom Island	Alaska	Yakutat			July	1906	USGS Mount St. Elias (A6)	-140.115	59.9997		Film Negative	https://digital.library.cornell.edu/catalog/ss:3321950
3321951	tve_exp1906_109	Russell's lake on Blossom Island	Alaska	Yakutat			July	1906	USGS Mount St. Elias (A6)	-140.115	59.9997	North America 2603	Film Negative	https://digital.library.cornell.edu/catalog/ss:3321951
3321952	tve_exp1906_110	Bird in pond. Blossom Island	Alaska	Yakutat			July	1906	USGS Mount St. Elias (A6)	-140.115	59.9997		Film Negative	https://digital.library.cornell.edu/catalog/ss:3321952
3321953	tve_exp1906_111	Bird in pond. Blossom Island	Alaska	Yakutat			July	1906	USGS Mount St. Elias (A6)	-140.115	59.9997		Film Negative	https://digital.library.cornell.edu/catalog/ss:3321953
3321954	tve_exp1906_112	Bird in pond. Blossom Island	Alaska	Yakutat			July	1906	USGS Mount St. Elias (A6)	-140.115	59.9997		Film Negative	https://digital.library.cornell.edu/catalog/ss:3321954
3321955	tve_exp1906_113	Vegetation Blossom Island	Alaska	Yakutat			July	1906	USGS Mount St. Elias (A6)	-140.115	59.9997		Film Negative	https://digital.library.cornell.edu/catalog/ss:3321955
3321956	tve_exp1906_114	Vegetation Blossom Island	Alaska	Yakutat				1906	USGS Mount St. Elias (A6)	-140.115	59.9997		Film Negative	https://digital.library.cornell.edu/catalog/ss:3321956
3321957	tve_exp1906_115	Vegetation Blossom Island	Alaska	Yakutat		31	July	1906	USGS Mount St. Elias (A6)	-140.115	59.9997		Film Negative	https://digital.library.cornell.edu/catalog/ss:3321957
3321958	tve_exp1906_116	Vegetation Blossom Island	Alaska	Yakutat			July	1906	USGS Mount St. Elias (A6)	-140.115	59.9997		Film Negative	https://digital.library.cornell.edu/catalog/ss:3321958
3321959	tve_exp1906_117	Marginal channel Blossom Island	Alaska	Yakutat		30	July	1906	USGS Mount St. Elias (A6)	-140.115	59.9997		Film Negative	https://digital.library.cornell.edu/catalog/ss:3321959
3321960	tve_exp1906_118	From Blossom Island Looking over to Hayden Glacier. Marginal channel.	Alaska	Yakutat	Hayden Glacier	30	July	1906	USGS Mount St. Elias (A6)	-140.115	59.9997		Film Negative	https://digital.library.cornell.edu/catalog/ss:3321960
3321961	tve_exp1906_119	Crevassed ice where stream flows out under Hayden Glacier. Looking west toward Blossom Island	Alaska	Yakutat	Hayden Glacier		July	1906	USGS Yaktuat (D6), Mount St. Elias (A6)	-140.025	59.988		Film Negative	https://digital.library.cornell.edu/catalog/ss:3321961
3321962	tve_exp1906_120	Outlet of Blossom Island lake and Hayden Glacier looking east	Alaska	Yakutat	Hayden Glacier		July	1906	USGS Yakutat (D6)	-140.115	59.9997		Film Negative	https://digital.library.cornell.edu/catalog/ss:3321962
3321963	tve_exp1906_121	Outflow stream Blossom Island	Alaska	Yakutat			July	1906	USGS Mount St. Elias (A6)	-140.115	59.9997		Film Negative	https://digital.library.cornell.edu/catalog/ss:3321963
3321964	tve_exp1906_122	Outflow stream at Blossom Island	Alaska	Yakutat		28	July	1906	USGS Mount St. Elias (A6)	-140.115	59.9997	Glaciers 673	Film Negative	https://digital.library.cornell.edu/catalog/ss:3321964
3321965	tve_exp1906_123	Outflow stream of Blossom Island lake and Hayden Glacier	Alaska	Yakutat	Hayden Glacier		July	1906	USGS Mount St. Elias (A6)	-140.115	59.9997		Film Negative	https://digital.library.cornell.edu/catalog/ss:3321965
3321966	tve_exp1906_124	Outflow of Blossom Island stream	Alaska	Yakutat		31	July	1906	USGS Mount St. Elias (A6)	-140.115	59.9997		Film Negative	https://digital.library.cornell.edu/catalog/ss:3321966
3321967	tve_exp1906_125	Outflow of Blossom Island stream	Alaska	Yakutat		31	July	1906	USGS Mount St. Elias (A6)	-140.115	59.9997		Film Negative	https://digital.library.cornell.edu/catalog/ss:3321967
3321968	tve_exp1906_126	Looking south west over Hayden and across Marvine Glacier.	Alaska	Yakutat	Hayden Glacier		July	1906	USGS Yaktuat (D6), Mount St. Elias (A6)	-140.025	59.988		Film Negative	https://digital.library.cornell.edu/catalog/ss:3321968
3321969	tve_exp1906_127	Looking up Hayden Glacier from west side. Mt. Cook.	Alaska	Yakutat	Hayden Glacier	1	August	1906	USGS Mount St. Elias (A6)	-140.025	59.988		Film Negative	https://digital.library.cornell.edu/catalog/ss:3321969
3321970	tve_exp1906_128	Long focus picture of Hayden Glacier and Mount Cook	Alaska	Yakutat	Hayden Glacier	1	August	1906	USGS Mount St. Elias (A6)	-140.025	59.988		Film Negative	https://digital.library.cornell.edu/catalog/ss:3321970
3321971	tve_exp1906_129	Up Hayden Glacier	Alaska	Yakutat	Hayden Glacier	1	August	1906	USGS Mount St. Elias (A6)	-140.025	59.988		Film Negative	https://digital.library.cornell.edu/catalog/ss:3321971
3321972	tve_exp1906_130	West entrance for Floral Pass	Alaska	Yakutat		1	August	1906	USGS Yakutat (D6)	-139.996	59.9788		Film Negative	https://digital.library.cornell.edu/catalog/ss:3321972
3321973	tve_exp1906_131	Moraine, look across valley just south of Floral Pass from mountain slope	Alaska	Yakutat		1	August	1906	USGS Yakutat (D6)	-139.996	59.9788		Film Negative	https://digital.library.cornell.edu/catalog/ss:3321973
3321974	tve_exp1906_132	From top of mountain on south side of Floral Pass looking over lower Lucia Glacier to Kwik river	Alaska	Yakutat	Lucia Glacier	31	July	1906	USGS Yakutat (D6)	-139.996	59.9788		Film Negative	https://digital.library.cornell.edu/catalog/ss:3321974
3321975	tve_exp1906_133	Lucia Glacier and nunatak from mountain top at south end of Floral Pass	Alaska	Yakutat	Lucia Glacier	1	August	1906	USGS Yakutat (D6)	-139.892	60.0059		Film Negative	https://digital.library.cornell.edu/catalog/ss:3321975
3321976	tve_exp1906_134	Lucia Glacier from crest of nunatak	Alaska	Yakutat	Lucia Glacier	2	August	1906	USGS Yakutat (D6)	-139.892	60.0059		Film Negative	https://digital.library.cornell.edu/catalog/ss:3321976
3321977	tve_exp1906_135	Lucia Glacier from crest of nunatak	Alaska	Yakutat	Lucia Glacier	31	July	1906	USGS Yakutat (D6)	-139.892	60.0059		Film Negative	https://digital.library.cornell.edu/catalog/ss:3321977
3321978	tve_exp1906_136	Ice rising up on slope of Lucia nunatak	Alaska	Yakutat	Lucia Glacier	2	August	1906	USGS Yakutat (D6)	-139.892	60.0059		Film Negative	https://digital.library.cornell.edu/catalog/ss:3321978
3321979	tve_exp1906_137	Moulin on Lucia Glacier	Alaska	Yakutat	Lucia Glacier	2	August	1906	USGS Yakutat (D6)	-139.892	60.0059		Film Negative	https://digital.library.cornell.edu/catalog/ss:3321979
3321980	tve_exp1906_138	Bear at Terrace Point	Alaska	Yakutat		2	August	1906	USGS Yaktuat (D5)	-139.839	59.957		Film Negative	https://digital.library.cornell.edu/catalog/ss:3321980
3321981	tve_exp1906_139	Concentric rings and crevasses of Atrevida Glacier from Lucia nunatak - long focus	Alaska	Yakutat	Atrevida Glacier	2	August	1906	USGS Yaktuat (D5)	-139.787	59.9709		Film Negative	https://digital.library.cornell.edu/catalog/ss:3321981
3321982	tve_exp1906_140	Long focus panorama of bulb of Atrevida Glacier from Terrace Point - two photos 206-207	Alaska	Yakutat	Atrevida Glacier	2	August	1906	USGS Yaktuat (D5)	-139.787	59.9709	North America 2269	Film Negative	https://digital.library.cornell.edu/catalog/ss:3321982
3321983	tve_exp1906_141	Long focus panorama of bulb of Atrevida Glacier from Terrace Point - two photos 206-207	Alaska	Yakutat	Atrevida Glacier	2	August	1906	USGS Yaktuat (D5)	-139.787	59.9709	North America 2268	Film Negative	https://digital.library.cornell.edu/catalog/ss:3321983
3321984	tve_exp1906_142	Panorama of Atrevida Glacier from Terrace Point. 3 photos 208-210	Alaska	Yakutat	Atrevida Glacier	7	August	1906	USGS Yaktuat (D5)	-139.787	59.9709	North America 2264	Film Negative	https://digital.library.cornell.edu/catalog/ss:3321984
3321985	tve_exp1906_143	Panorama of Atrevida Glacier from Terrace Point. 3 photos, 208,209,210	Alaska	Yakutat	Atrevida Glacier	9	August	1906	USGS Yaktuat (D5)	-139.787	59.9709	North America 2265	Film Negative	https://digital.library.cornell.edu/catalog/ss:3321985
3321986	tve_exp1906_144	Panorama of Atrevida Glacier from Terrace Point. 3 photos - 208-210	Alaska	Yakutat	Atrevida Glacier	11	August	1906	USGS Yaktuat (D5)	-139.787	59.9709	North America 2266	Film Negative	https://digital.library.cornell.edu/catalog/ss:3321986
3321987	tve_exp1906_145	Long focus view of crevasses in Atrevida Glacier from Terrace Point.	Alaska	Yakutat	Atrevida Glacier	15	August	1906	USGS Yaktuat (D5)	-139.787	59.9709	North America 2263	Film Negative	https://digital.library.cornell.edu/catalog/ss:3321987
3321988	tve_exp1906_146	Alders. Terrace Camp. Kwik valley.	Alaska	Yakutat		15	August	1906	USGS Yaktuat (D5)	-140.003	59.9192	North America 2034	Film Negative	https://digital.library.cornell.edu/catalog/ss:3321988
3321990	tve_exp1906_148	Kwik river with saw teeth waves. Cottonwood camp. Mt. Cook in background	Alaska	Yakutat		17	August	1906	USGS Yaktuat (D5)	-140.003	59.9192	Glaciers 645	Film Negative	https://digital.library.cornell.edu/catalog/ss:3321990
3321991	tve_exp1906_149	Sunset up Kwik river. Marvine Glacier in distance. From Strawberry Island	Alaska	Yakutat	Marvine Glacier	17	August	1906	USGS Yaktuat (D5)	-140.003	59.9192	Glaciers 640	Film Negative	https://digital.library.cornell.edu/catalog/ss:3321991
3321992	tve_exp1906_150	Sunset from Strawberry Island. St. Elias above clouds. Kwik (stream) in foreground	Alaska	Yakutat		17	August	1906	USGS Yaktuat (D5)	-140.93	60.291	Glaciers 644|looking at sunset, landscape is dark	Film Negative	https://digital.library.cornell.edu/catalog/ss:3321992
3321993	tve_exp1906_151	Mt. St. Elias, August, Cook, and mountain panorama from Strawberry Island	Alaska	Yakutat		18	August	1906	USGS Yaktuat (D5)	-139.845	59.8293		Film Negative	https://digital.library.cornell.edu/catalog/ss:3321993
3321994	tve_exp1906_152	Hubbard Glacier from Osier Island - Russell's site	Alaska	Yakutat	Hubbard Glacier	18	August	1906	USGS Mount St. Elias (A4)	-139.466	60.0247		Film Negative	https://digital.library.cornell.edu/catalog/ss:3321994
3321995	tve_exp1906_153	Front of Hubbard Glacier from eastern margin, nearly at Gilbert's site	Alaska	Yakutat	Hubbard Glacier	18	August	1906	USGS Mount St. Elias (A4)	-139.466	60.0247		Film Negative	https://digital.library.cornell.edu/catalog/ss:3321995
9471531	tve_exp1906_154_02	Orange Glacier from moraine west of wash plain, near site of last year's photo	Alaska	Yakutat	Orange Glacier	18	August	1906	USGS Yaktuat (D4)	-139.192	59.9417	North America 2444	Film Negative	https://digital.library.cornell.edu/catalog/ss:9471531
3321996	tve_exp1906_154	Orange Glacier from moraine west of wash plain, near site of last year's photo	Alaska	Yakutat	Orange Glacier	18	August	1906	USGS Yaktuat (D4)	-139.192	59.9417	North America 2444	Film Negative	https://digital.library.cornell.edu/catalog/ss:3321996
3321997	tve_exp1906_155	Panorama (two photos) of Orange Glacier from the east- 227,228	Alaska	Yakutat	Orange Glacier	18	August	1906	USGS Yaktuat (D4)	-139.192	59.9417		Film Negative	https://digital.library.cornell.edu/catalog/ss:3321997
3321998	tve_exp1906_156	Panorama (two photos) of Orange Glacier from east - 227-228	Alaska	Yakutat	Orange Glacier	18	August	1906	USGS Yaktuat (D4)	-139.192	59.9417	North America 2445	Film Negative	https://digital.library.cornell.edu/catalog/ss:3321998
9471532	tve_exp1906_157_02	Crevassed edge of Orange Glacier from western margin	Alaska	Yakutat	Orange Glacier	18	August	1906	USGS Yaktuat (D4)	-139.192	59.9417		Film Negative	https://digital.library.cornell.edu/catalog/ss:9471532
3321999	tve_exp1906_157	Crevassed edge of Orange Glacier from western margin	Alaska	Yakutat	Orange Glacier	18	August	1906	USGS Yaktuat (D4)	-139.192	59.9417		Film Negative	https://digital.library.cornell.edu/catalog/ss:3321999
3322000	tve_exp1906_158	Medial moraine of through glacier - Variegated from elevation of 1650 Feet	Alaska	Yakutat	Variegated Glacier	18	August	1906	USGS Yaktuat (D4)	-139.287	59.9999	North America 2446	Film Negative	https://digital.library.cornell.edu/catalog/ss:3322000
9471533	tve_exp1906_159_02	Medial moraine of Variegated Glacier. Orange Glacier and Hubbard in distance	Alaska	Yakutat	Variegated Glacier	20	August	1906	USGS Yaktuat (D4)	-139.287	59.9999		Film Negative	https://digital.library.cornell.edu/catalog/ss:9471533
3322001	tve_exp1906_159	Medial moraine of Variegated Glacier. Orange Glacier and Hubbard in distance	Alaska	Yakutat	Variegated Glacier	20	August	1906	USGS Yaktuat (D4)	-139.287	59.9999		Film Negative	https://digital.library.cornell.edu/catalog/ss:3322001
9471534	tve_exp1906_160_02	Marginal channel in drift, west of Variegated Glacier	Alaska	Yakutat	Variegated Glacier	20	June	1906	USGS Yaktuat (D4)	-139.287	59.9999	North America 2448	Film Negative	https://digital.library.cornell.edu/catalog/ss:9471534
3322002	tve_exp1906_160	Marginal channel in drift, west of Variegated Glacier	Alaska	Yakutat	Variegated Glacier	20	June	1906	USGS Yaktuat (D4)	-139.287	59.9999	North America 2448	Film Negative	https://digital.library.cornell.edu/catalog/ss:3322002
3322003	tve_exp1906_161	Rock gorge south side of Variegated Glacer	Alaska	Yakutat	Variegated Glacier		June	1906	USGS Yaktuat (D4)	-139.287	59.9999	North America 2449	Film Negative	https://digital.library.cornell.edu/catalog/ss:3322003
3322004	tve_exp1906_162	Mt. Alexander and Alexander Glacier from north shore of Russell fiord	Alaska	Yakutat	Alexander Glacier		June	1906	USGS Yaktuat (D4)	-139.452	59.9209		Film Negative	https://digital.library.cornell.edu/catalog/ss:3322004
3322005	tve_exp1906_163	Devil's club, off Kahntak (Khantaak) Island	Alaska	Yakutat		18	June	1906	USGS Yakutat (C5)	-139.76	59.5988	North America 1907	Film Negative	https://digital.library.cornell.edu/catalog/ss:3322005
3322006	tve_exp1906_164	Northern entrance of Wrangell Narrows	Alaska	Southern Panhandle		21	June	1906	USGS Petersburg (D3)	-132.929	56.6565		Glass	https://digital.library.cornell.edu/catalog/ss:3322006
9471535	tve_exp1906_165_02	Lighthouse - Inside Passage	Alaska	Southern Panhandle		22	June	1906					Glass	https://digital.library.cornell.edu/catalog/ss:9471535
3322007	tve_exp1906_165	Lighthouse - Inside Passage	Alaska	Southern Panhandle		22	June	1906					Glass	https://digital.library.cornell.edu/catalog/ss:3322007
3322008	tve_exp1906_166	Inside Passage - Wrangell Narrows	Alaska	Southern Panhandle		22	June	1906		-132.929	56.6565		Glass	https://digital.library.cornell.edu/catalog/ss:3322008
3322009	tve_exp1906_167	Inside Passage - aligned cliffs	Alaska	Southern Panhandle		22	June	1906					Glass	https://digital.library.cornell.edu/catalog/ss:3322009
3322010	tve_exp1906_168	Long focus picture in Inside Passage	Alaska	Southern Panhandle			June	1906					Glass	https://digital.library.cornell.edu/catalog/ss:3322010
3322011	tve_exp1906_169	Long focus picture of Mt. Edgcomb (Edgecumbe) from steamer in Stika Harbor 8:30 PM	Alaska	Southern Panhandle		22	June	1906	USGS Sitka (A6)	-135.759	57.0514	North America 2060	Glass	https://digital.library.cornell.edu/catalog/ss:3322011
3322012	tve_exp1906_170	Fairweather Range showing Fairweather peak from steamer. Also sea gulls.	Alaska	Southern Panhandle			June	1906	USGS Mount Fairweather (D5)	-137.543	58.907		Glass	https://digital.library.cornell.edu/catalog/ss:3322012
3322013	tve_exp1906_171	Fairweather Range from steamer	Alaska	Southern Panhandle		29	June	1906	USGS Mount Fairweather (D5)	-137.543	58.907	North America 2049	Glass	https://digital.library.cornell.edu/catalog/ss:3322013
3322014	tve_exp1906_172	Miss Pauline Powers - on Santa Ana (steamer)	Alaska	Southern Panhandle		29	June	1906					Glass	https://digital.library.cornell.edu/catalog/ss:3322014
3322015	tve_exp1906_173	Forward on the Santa Ana, from the Captain's Bridge, Sitka	Alaska	Southern Panhandle			July	1906					Glass	https://digital.library.cornell.edu/catalog/ss:3322015
3322016	tve_exp1906_174	Amphitheatre Butte from east side Disenchantment Bay	Alaska	Yakutat		10	July	1906	USGS Yakutat (D5)	-139.784	59.9463		Glass	https://digital.library.cornell.edu/catalog/ss:3322016
3322017	tve_exp1906_175	Long focus picture of Amphitheatre Butte from Indian summer camp - shows moraine terrace	Alaska	Yakutat		10	July	1906	USGS Yakutat (D5)	-139.784	59.9463	North America 2225	Glass	https://digital.library.cornell.edu/catalog/ss:3322017
3322018	tve_exp1906_176	East side entrance for Disenchantment Bay from Indian Summer camp - shows uplifted shore	Alaska	Yakutat			July	1906	USGS Yakutat (D5)	-139.564	59.9874		Glass	https://digital.library.cornell.edu/catalog/ss:3322018
3322019	tve_exp1906_177	Turner Glacier Haenke Island from Camp 3 - north side of Indian Camp valley	Alaska	Yakutat	Turner Glacier		July	1906	USGS Yakutat (D5). Mount St. Elias (A5)	-139.626	60.0271		Glass	https://digital.library.cornell.edu/catalog/ss:3322019
3322020	tve_exp1906_178	Plant fruits in sulphur stream west side Disenchantment Bay	Alaska	Yakutat			June	1906	USGS Yaktuat (D5)	-139.651	59.9391		Glass	https://digital.library.cornell.edu/catalog/ss:3322020
3322021	tve_exp1906_179	Plant growth sulphur stream, west side Disenchantment Bay	Alaska	Yakutat			July	1906	USGS Yaktuat (D5)	-139.651	59.9391		Glass	https://digital.library.cornell.edu/catalog/ss:3322021
3322022	tve_exp1906_180	Plant growth near head of Russell Fiord	Alaska	Yakutat			July	1906	USGS Yaktuat (D5)	-139.651	59.9391		Glass	https://digital.library.cornell.edu/catalog/ss:3322022
3322023	tve_exp1906_181	Plant Growth	Alaska	Yakutat		28	June	1906	USGS Yaktuat (D5)	-139.651	59.9391		Glass	https://digital.library.cornell.edu/catalog/ss:3322023
3322024	tve_exp1906_182	Looking northward along elevated beaches - westside of Disenchantment Bay, opposite Indian Camp	Alaska	Yakutat	Hidden Glacier	29	June	1906	USGS Yaktuat (D5)	-139.651	59.9391	Ocean 1490A	Glass	https://digital.library.cornell.edu/catalog/ss:3322024
3322025	tve_exp1906_183	Elevated bench in rock on Haenke Isd. east side	Alaska	Yakutat		29	June	1906	USGS Yaktuat (D5)	-139.607	60.0573	Ocean 1488A	Glass	https://digital.library.cornell.edu/catalog/ss:3322025
3322026	tve_exp1906_184	Sulphur stream on elevated beach, Disenchantment Bay Ann Glac. Eeris, July 1910	Alaska	Yakutat		29	June	1906	USGS Yaktuat (D5)	-139.564	59.9874	Glaciers 2990. note: not sure why this says 1910, matches 1906 print in this box - mistake	Glass	https://digital.library.cornell.edu/catalog/ss:3322026
3322027	tve_exp1906_185	Russell valley (with glacier at head) from west side of Disenchantment Bay	Alaska	Yakutat		29	June	1906	USGS Yakutat (D4)	-139.318	59.8823	Glaciers 2991	Glass	https://digital.library.cornell.edu/catalog/ss:3322027
3322028	tve_exp1906_186	High level moraine terrace, Amphitheatre Butte - three men in distance gives scale	Alaska	Yakutat		29	June	1906	USGS Yakutat (D5)	-139.784	59.9463	North America 2601	Glass	https://digital.library.cornell.edu/catalog/ss:3322028
3322029	tve_exp1906_187	Fall of Atrevida glacier from crest of Amphitheater Butte, DD=0.70	Alaska	Yakutat	Atrevida Glacier			1906	USGS Yakutat (D5)	-139.787	59.9709	Rivers 1764	Glass	https://digital.library.cornell.edu/catalog/ss:3322029
3322030	tve_exp1906_188	Panorama of four pictures (271,272,273,274) of crevassed Atrevida Glacier from crest of Amphitheatre Butte	Alaska	Yakutat	Atrevida Glacier			1906	USGS Yakutat (D5)	-139.787	59.9709	North America 2262	Glass	https://digital.library.cornell.edu/catalog/ss:3322030
3322031	tve_exp1906_189	Panorama of four pictures (271,272,273,274) of crevassed Atrevida Glacier from crest of Amphitheatre Butte	Alaska	Yakutat	Atrevida Glacier	10	July	1906	USGS Yakutat (D5)	-139.787	59.9709	North America 2261	Glass	https://digital.library.cornell.edu/catalog/ss:3322031
3322032	tve_exp1906_190	Panorama of four pictures (271,272,273,274) of crevassed Atrevida Glacier from crest of Amphitheatre Butte	Alaska	Yakutat	Atrevida Glacier	29	June	1906	USGS Yakutat (D5)	-139.787	59.9709	North America 2260	Glass	https://digital.library.cornell.edu/catalog/ss:3322032
3322033	tve_exp1906_191	Panorama of four pictures of crevassed Atrevida Glacier (see 271-274) from crest of Amphitheatre Butte	Alaska	Yakutat	Atrevida Glacier			1906	USGS Yakutat (D5)	-139.787	59.9709	North America 2259	Glass	https://digital.library.cornell.edu/catalog/ss:3322033
3322034	tve_exp1906_192	Front of Atrevida Glacier west of point of emergence of stream, showing crevassed broken front	Alaska	Yakutat	Atrevida Glacier	28	June	1906	USGS Yakutat (D5)	-139.787	59.9709	North America 2256	Glass	https://digital.library.cornell.edu/catalog/ss:3322034
3322035	tve_exp1906_193	Advancing front of Atreida Glacier, near Dalton Creek, same as 275	Alaska	Yakutat	Atrevida Glacier	28	June	1906	USGS Yakutat (D5)	-139.787	59.9709		Glass	https://digital.library.cornell.edu/catalog/ss:3322035
3322036	tve_exp1906_194	Long focus picture of mountains on west side of Disenchantment Bay, from east side	Alaska	Yakutat		28	June	1906	USGS Mount St. Elias (A5,A6)	-139.608	59.9978		Glass	https://digital.library.cornell.edu/catalog/ss:3322036
3322037	tve_exp1906_195	Turner Glacier from mountain slope west side of Disenchantment Bay	Alaska	Yakutat	Turner Glacier	28	June	1906	USGS Mount St. Elias (A5)	-139.608	59.9978	North America 2351	Glass	https://digital.library.cornell.edu/catalog/ss:3322037
3322038	tve_exp1906_196	Long focus panorama of four pictures (279-282) of Turner and Hubbard Glaciers from mountain slope on west side of Disenchantment Bay	Alaska	Yakutat	Turner Glacier	28	June	1906	USGS Mount St. Elias (A4,A5)	-139.626	60.0271	North America 2350A	Glass	https://digital.library.cornell.edu/catalog/ss:3322038
3919387	tve_exp1906_197	Long Focus Panorama of Four Pictures (279-282) of Turner and Hubbard Glaciers From Mountain Slope on West Side of Disenchantment Bay	Alaska	Yakutat	Turner Glacier	21	June	1906	USGS Mount St. Elias (A4,A5)	-139.626	60.0271	North America 2350B	Glass	https://digital.library.cornell.edu/catalog/ss:3919387
3322039	tve_exp1906_197	Long focus panorama of four pictures (279-282) of Turner and Hubbard Glaciers from mountain slope on west side of Disenchantment Bay	Alaska	Yakutat	Hubbard Glacier	21	June	1906	USGS Mount St. Elias (A4,A5)	-139.466	60.0247	North America 2350B	Glass	https://digital.library.cornell.edu/catalog/ss:3322039
3322040	tve_exp1906_198	Long focus panorama of four pictures (279-282) of Turner and Hubbard Glaciers from mountain slope on west side of Disenchantment Bay	Alaska	Yakutat	Hubbard Glacier	21	June	1906	USGS Mount St. Elias (A4,A5)	-139.466	60.0247	North America 2350C	Glass	https://digital.library.cornell.edu/catalog/ss:3322040
3322041	tve_exp1906_199	Long focus panorama of four pictures (279-282) of Turner and Hubbard Glaciers from mountain slope on west side of Disenchantment Bay	Alaska	Yakutat	Hubbard Glacier	21	June	1906	USGS Mount St. Elias (A4,A5)	-139.466	60.0247	North America 2350C	Glass	https://digital.library.cornell.edu/catalog/ss:3322041
3322042	tve_exp1906_200	Long focus panorama of four pictures (279-282) of Turner and Hubbard Glaciers from mountain slope on west side of Disenchantment Bay	Alaska	Yakutat	Hubbard Glacier	21	June	1906	USGS Mount St. Elias (A4,A5)	-139.466	60.0247	North America 2350D	Glass	https://digital.library.cornell.edu/catalog/ss:3322042
3919388	tve_exp1906_200b	Long Focus Panorama of Four Pictures (279-282) of Turner and Hubbard Glaciers From Mountain Slope on West Side of Disenchantment Bay	Alaska	Yakutat	Hubbard Glacier	21	June	1906	USGS Mount St. Elias (A4,A5)	-139.466	60.0247	North America 2350D	Glass	https://digital.library.cornell.edu/catalog/ss:3919388
3322043	tve_exp1906_201	Panorama of four pictures (283-286) of Turner and Hubbard Glaciers from crest of Haenke Island	Alaska	Yakutat	Turner Glacier	21	June	1906	USGS Mount St. Elias (A4,A5)	-139.626	60.0271		Glass	https://digital.library.cornell.edu/catalog/ss:3322043
3486248	tve_exp1906_202_02	Panorama of four pictures (283-286) of Turner and Hubbard Glaciers from crest of Haenke Island	Alaska	Yakutat	Turner Glacier	3	July	1906	USGS Mount St. Elias (A4,A5)	-139.626	60.0271	multiple scanned copies	Glass	https://digital.library.cornell.edu/catalog/ss:3486248
3486249	tve_exp1906_202_03	Panorama of Four Pictures (283-286) of Turner and Hubbard Glaciers From Crest of Haenke Island	Alaska	Yakutat	Turner Glacier	3	July	1906	USGS Mount St. Elias (A4,A5)	-139.626	60.0271	multiple scanned copies	Glass	https://digital.library.cornell.edu/catalog/ss:3486249
3322044	tve_exp1906_202	Panorama of four pictures (283-286) of Turner and Hubbard Glaciers from crest of Haenke Island	Alaska	Yakutat	Turner Glacier	3	July	1906	USGS Mount St. Elias (A4,A5)	-139.626	60.0271	multiple scanned copies	Glass	https://digital.library.cornell.edu/catalog/ss:3322044
3486251	tve_exp1906_203_02	Panorama of four pictures (283-286) of Turner and Hubbard Glaciers From Crest of Haenke Island	Alaska	Yakutat	Hubbard Glacier	3	July	1906	USGS Mount St. Elias (A4,A5)	-139.466	60.0247	multiple scanned copies	Glass	https://digital.library.cornell.edu/catalog/ss:3486251
3322045	tve_exp1906_203	Panorama of four pictures (283-286) of Turner and Hubbard Glaciers from crest of Haenke Island	Alaska	Yakutat	Hubbard Glacier	3	July	1906	USGS Mount St. Elias (A4,A5)	-139.466	60.0247	multiple scanned copies	Glass	https://digital.library.cornell.edu/catalog/ss:3322045
3486255	tve_exp1906_204_02	Panorama of four pictures (283-286) of Turner and Hubbard Glaciers From Crest of Haenke Island	Alaska	Yakutat	Hubbard Glacier	4	July	1906	USGS Mount St. Elias (A4,A5)	-139.466	60.0247	multiple scanned copies	Glass	https://digital.library.cornell.edu/catalog/ss:3486255
3322046	tve_exp1906_204	Panorama of four pictures (283-286) of Turner and Hubbard Glaciers from crest of Haenke Island	Alaska	Yakutat	Hubbard Glacier	4	July	1906	USGS Mount St. Elias (A4,A5)	-139.466	60.0247	multiple scanned copies	Glass	https://digital.library.cornell.edu/catalog/ss:3322046
3486257	tve_exp1906_205_02	Long focus picture of union of Turner and Haenke Glaciers from near summit of Haenke Island	Alaska	Yakutat	Turner Glacier	4	July	1906	USGS Mount St. Elias (A4,A5)	-139.626	60.0271	multiple scanned copies	Glass	https://digital.library.cornell.edu/catalog/ss:3486257
3322047	tve_exp1906_205	Long focus picture of union of Turner and Haenke Glaciers from near summit of Haenke Island	Alaska	Yakutat	Hubbard Glacier	4	July	1906	USGS Mount St. Elias (A4,A5)	-139.466	60.0247	multiple scanned copies	Glass	https://digital.library.cornell.edu/catalog/ss:3322046
3322048	tve_exp1906_206	Ice front of Hubbard Glacier from fiord	Alaska	Yakutat	Hubbard Glacier	4	July	1906	USGS Mount St. Elias (A4,A5)	-139.466	60.0247	North America 2396	Glass	https://digital.library.cornell.edu/catalog/ss:3322048
3322049	tve_exp1906_207	Ice front of Hubbard Glacier from fiord	Alaska	Yakutat	Hubbard Glacier	4	July	1906	USGS Mount St. Elias (A4,A5)	-139.466	60.0247		Glass	https://digital.library.cornell.edu/catalog/ss:3322049
3322050	tve_exp1906_208	Long focus picture of southern edge of Turner Glacier from Osier Island. Part of panorama 291,292,293.	Alaska	Yakutat	Turner Glacier	4	July	1906	USGS Mount St. Elias (A5)	-139.626	60.0271	North America 2349A	Glass	https://digital.library.cornell.edu/catalog/ss:3322050
3486258	tve_exp1906_209_02	Long Focus Panorama (291-292-293) of Turner Glacier, Ect. From Osier Island	Alaska	Yakutat	Turner Glacier	3	July	1906	USGS Mount St. Elias (A5)	-139.626	60.0271	multiple scanned copies	Glass	https://digital.library.cornell.edu/catalog/ss:3486258
3322051	tve_exp1906_209	Long focus panorama (291-292-293) of Turner Glacier, ect. from Osier Island	Alaska	Yakutat	Turner Glacier	3	July	1906	USGS Mount St. Elias (A5)	-139.626	60.0271	multiple scanned copies	Glass	https://digital.library.cornell.edu/catalog/ss:3322051
3322052	tve_exp1906_210	Long focus panorama (291-292-293) of Turner Glacier, ect. from Osier Island	Alaska	Yakutat	Turner Glacier	3	July	1906	USGS Mount St. Elias (A5)	-139.626	60.0271	North America 2349C	Glass	https://digital.library.cornell.edu/catalog/ss:3322052
3322053	tve_exp1906_211	Hubbard Glacier from Russell's site on Osier Island	Alaska	Yakutat	Hubbard Glacier	3	July	1906	USGS Mount St. Elias (A4,A5)	-139.466	60.0247	North America 2373	Glass	https://digital.library.cornell.edu/catalog/ss:3322053
3322054	tve_exp1906_212	Long focus picture of front of Hubbard Glacier from Osier Island not on crest	Alaska	Yakutat	Hubbard Glacier	3	July	1906	USGS Mount St. Elias (A4,A5)	-139.466	60.0247	North America 2374	Glass	https://digital.library.cornell.edu/catalog/ss:3322054
3486260	tve_exp1906_213_02	Panorama (296, 297, 298, 299) of Turner and Hubbard Glaciers From Gilbert's 1000-Ft Site on Gilbert Point.	Alaska	Yakutat	Turner Glacier	3	July	1906	USGS Mount St. Elias (A4,A5)	-139.626	60.0271	multiple scanned copies	Glass	https://digital.library.cornell.edu/catalog/ss:3486260
3486261	tve_exp1906_213_03	Panorama (296, 297, 298, 299) of Turner and Hubbard Glaciers From Gilbert's 1000-Ft Site on Gilbert Point.	Alaska	Yakutat	Turner Glacier	3	July	1906	USGS Mount St. Elias (A4,A5)	-139.626	60.0271	multiple scanned copies	Glass	https://digital.library.cornell.edu/catalog/ss:3486261
3322055	tve_exp1906_213	Panorama (296,297,298,299) of Turner and Hubbard Glaciers from Gilbert's 1000-ft site on Gilbert point.	Alaska	Yakutat	Turner Glacier	3	July	1906	USGS Mount St. Elias (A4,A5)	-139.626	60.0271	multiple scanned copies	Glass	https://digital.library.cornell.edu/catalog/ss:3322055
3322056	tve_exp1906_214	Panorama of Turner and Hubbard Glaciers from Gilbert's 1000-foot site on Gilbert Point	Alaska	Yakutat	Hubbard Glacier	3	July	1906	USGS Mount St. Elias (A4,A5)	-139.466	60.0247	North America 2382	Glass	https://digital.library.cornell.edu/catalog/ss:3322056
3322057	tve_exp1906_215	Panorama (296-299) of Turner and Hubbard Glaciers from Gilbert's 1000-foot site on Gilbert Point	Alaska	Yakutat	Hubbard Glacier	3	July	1906	USGS Mount St. Elias (A4,A5)	-139.466	60.0247	North America 2381	Glass	https://digital.library.cornell.edu/catalog/ss:3322057
3322058	tve_exp1906_216	ellioe	Alaska	Yakutat	Haenke Glacier			1906	USGS Mount St. Elias (A4,A5)	-139.607	60.0573	North America 2427	Glass	https://digital.library.cornell.edu/catalog/ss:3322058
3322059	tve_exp1906_217	Long focus panorama (300-301) of Turner and Haenke Glaciers from Gilbert's 1000-foot site on Gilbert Point	Alaska	Yakutat	Turner Glacier	3	July	1906	USGS Mount St. Elias (A4,A5)	-139.626	60.0271	North America 2346A	Glass	https://digital.library.cornell.edu/catalog/ss:3322059
3322060	tve_exp1906_218	Long focus panorama (300-301) of Turner and Haenke Glaciers from Gilbert's 1000-foot site on Gilbert Point	Alaska	Yakutat	Turner Glacier	5	July	1906	USGS Mount St. Elias (A4,A5)	-139.626	60.0271	North America 2346B	Glass	https://digital.library.cornell.edu/catalog/ss:3322060
3322061	tve_exp1906_219	Long focus panorama (302-303) of Variegated Glacier from Gilbert's 1000-foot station on Gilbert Point	Alaska	Yakutat	Variegated Glacier	5	July	1906	USGS Yakutat (D4)	-139.287	59.9999	North America 2428	Glass	https://digital.library.cornell.edu/catalog/ss:3322061
3322062	tve_exp1906_220	Long focus panorama (302-303) of Variegated Glacier from Gilbert's 1000-foot site on Gilbert Point	Alaska	Yakutat	Variegated Glacier	5	July	1906	USGS Yakutat (D3)	-139.287	59.9999	North America 2429	Glass	https://digital.library.cornell.edu/catalog/ss:3322062
3322063	tve_exp1906_221	Front of Nunatak Glacier from Gilbert's site	Alaska	Yakutat	Nunatak Glacier	5	July	1906	USGS Yakutat (D3)	-138.966	59.8104	North America 2490	Glass	https://digital.library.cornell.edu/catalog/ss:3322063
3322064	tve_exp1906_222	Looking up Nunatak Glacier from crest of Gannett Nunatak	Alaska	Yakutat	Nunatak Glacier	5	July	1906	USGS Yakutat (D3)	-138.966	59.8104	North America 2454	Glass	https://digital.library.cornell.edu/catalog/ss:3322064
3322065	tve_exp1906_223	Looking up Nunatak Glacier from crest of Gannett Nunatak	Alaska	Yakutat	Nunatak Glacier	5	July	1906	USGS Yakutat (D3)	-138.966	59.8104	North America 2454	Glass	https://digital.library.cornell.edu/catalog/ss:3322065
3322066	tve_exp1906_224	Looking down on Nunatak Glacier front from crest of Gannett Nunatak - long focus	Alaska	Yakutat	Nunatak Glacier	5	July	1906	USGS Yakutat (D3)	-138.966	59.8104	North America 2481	Glass	https://digital.library.cornell.edu/catalog/ss:3322066
3322067	tve_exp1906_225	Looking down on Nunatak Glacier front from crest of Gannett Nunatak - long focus	Alaska	Yakutat	Nunatak Glacier	5	July	1906	USGS Yakutat (D3)	-138.966	59.8104		Glass	https://digital.library.cornell.edu/catalog/ss:3322067
3322068	tve_exp1906_226	Looking west from crest of Gannett Nunatak, and unknown valley	Alaska	Yakutat		5	July	1906	USGS Yakutat (D3)	-139.033	59.8261	Glaciers 2860	Glass	https://digital.library.cornell.edu/catalog/ss:3322068
3322069	tve_exp1906_227	Hanging valley - just west of Gannett Nuntak (see 311-313) from fan, looking up at lip.	Alaska	Yakutat		6	July	1906	USGS Yakutat (D3)	-139.033	59.8261	Glaciers 2984	Glass	https://digital.library.cornell.edu/catalog/ss:3322069
3322070	tve_exp1906_228	Hanging valley just west of Gannett Nunatak (310-313). From lip, looking up valley	Alaska	Yakutat		8	July	1906	USGS Yakutat (D3)	-139.033	59.8261	Glaciers 2985	Glass	https://digital.library.cornell.edu/catalog/ss:3322070
3322071	tve_exp1906_229	Looking out of Hanging valley just west of Gannett Nunatak (see also 310-313)	Alaska	Yakutat		8	July	1906	USGS Yakutat (D3)	-139.033	59.8261	Glaciers 2986	Glass	https://digital.library.cornell.edu/catalog/ss:3322071
3322072	tve_exp1906_230	Hanging valley (310-312) just west of Gannett Nunatak. Looking along rock lip in opposite direction from 312	Alaska	Yakutat		7	July	1906	USGS Yakutat (D3)	-139.033	59.8261	Glaciers 2987	Glass	https://digital.library.cornell.edu/catalog/ss:3322072
3322073	tve_exp1906_231	Hidden Glacier outwash plain No. 4 DD 0.90	Alaska	Yakutat		8	July	1906	USGS Yakutat (D4)	-139.05	59.7003	North America 2507	Glass	https://digital.library.cornell.edu/catalog/ss:3322073
3322074	tve_exp1906_232	Looking down Russell Fjord from Cape Stoss Camp, No. 7 DD=0.62	Alaska	Yakutat		8	July	1906	USGS Yakutat (C4)	-139.285	59.6147	North America 2206	Glass	https://digital.library.cornell.edu/catalog/ss:3322074
3322076	tve_exp1906_234	Lakes 1100 feet above Russell fiord, Mountain slope northwest of Cape Stoss	Alaska	Yakutat		12	July	1906	USGS Yakutat (C4)	-139.285	59.6147	North America 2220	Glass	https://digital.library.cornell.edu/catalog/ss:3322076
3322077	tve_exp1906_235	Panorama (318,319,320) of head of Russell fiord and Yakutat flat from mountain top (1200 ft) northwest of Cape Stoss, which shows in picture	Alaska	Yakutat		12	July	1906	USGS Yakutat (C4, D4)	-139.285	59.6147	North America 2233	Glass	https://digital.library.cornell.edu/catalog/ss:3322077
3322078	tve_exp1906_236	Panorama (318,319,320) of head of Russell fiord and Yakutat flat from mountain top (1200 ft) northwest of Cape Stoss	Alaska	Yakutat		13	July	1906	USGS Yakutat (C4, D4)	-139.285	59.6147	North America 2234	Glass	https://digital.library.cornell.edu/catalog/ss:3322078
3322079	tve_exp1906_237	Panorama (318,319,320) of head of Russell fiord and Yakutat flat from mountain top (1200 ft) northwest of Cape Stoss	Alaska	Yakutat		13	July	1906	USGS Yakutat (C4, D4)	-139.285	59.6147	North America 2235	Glass	https://digital.library.cornell.edu/catalog/ss:3322079
3322080	tve_exp1906_238	Looking northwest across gravels and moraine to Atrevida Glacier and Ampthitheatre Butte from west shore of Yakutat Bay	Alaska	Yakutat	Atrevida Glacier	13	July	1906	USGS Yakutat (D5)	-139.787	59.9709	North America 2310	Glass	https://digital.library.cornell.edu/catalog/ss:3322080
3322081	tve_exp1906_239	Looking southwest across moraine and hummocks on west side of Yakutat Bay. From same point as 321	Alaska	Yakutat				1906	USGS Yakutat (C5, D5)	-139.938	59.7818	North America 2311	Glass	https://digital.library.cornell.edu/catalog/ss:3322081
10018938	tve_exp1906_240_02	Sunrise in Yakutat Bay west side Mt. Seattle in distance	Alaska	Yakutat				1906	USGS Mount St. Elias (A4)	-139.938	59.7818	North America 2570	Glass	https://digital.library.cornell.edu/catalog/ss:10018938
3322082	tve_exp1906_240	Sunrise in Yakutat Bay west side Mt. Seattle in distance	Alaska	Yakutat				1906	USGS Mount St. Elias (A4)	-139.938	59.7818	North America 2570	Glass	https://digital.library.cornell.edu/catalog/ss:3322082
3322083	tve_exp1906_241	The Kwik River from Strawberry [Island] DD=0.55	Alaska	Yakutat				1906	USGS Yakutat (D6)	-140.003	59.9192	Glaciers 641	Glass	https://digital.library.cornell.edu/catalog/ss:3322083
3322084	tve_exp1906_242	The Kwik River from Strawberry Isl.	Alaska	Yakutat				1906	USGS Yakutat (D6)	-140.003	59.9192	Glaciers 643	Glass	https://digital.library.cornell.edu/catalog/ss:3322084
12556261		Film negative camping in Yellowstone: Powers, Butler & von Engeln (1906 on way home from Alaska)	United States	Yellowstone				1906					Film Negative	https://digital.library.cornell.edu/catalog/ss:12556261
12556263		Posing in front of horse and carriage in Yellowstone, captioned “Returning home from 1906 Alaska trip”	United States	Yellowstone				1906					Film Negative	https://digital.library.cornell.edu/catalog/ss:12556263
3322781	tve_exp1909_001	Nunatak fiord from high up on N. shore 1905 site, shows Nunatak	Alaska	Yakutat				1909	USGS Yakutat (D3)			B	Film Negative	https://digital.library.cornell.edu/catalog/ss:3322781
3322782	tve_exp1909_002a	Nunatak Fiord #1 pan. Toward Glacier	Alaska	Yakutat				1909	USGS Yakutat (D3)			n/a	Film Negative	https://digital.library.cornell.edu/catalog/ss:3322782
3322783	tve_exp1909_002b	Nunatak Fiord #1 pan. Toward Glacier (almost identical to next photo 163)	Alaska	Yakutat				1909	USGS Yakutat (D3)			n/a	Film Negative	https://digital.library.cornell.edu/catalog/ss:3322783
3322784	tve_exp1909_003	Nunatak Fiord from Gilbert site	Alaska	Yakutat				1909	USGS Yakutat (D3)			A+	Film Negative	https://digital.library.cornell.edu/catalog/ss:3322784
3322785	tve_exp1909_004	Nunatak Fiord #2 of pan.	Alaska	Yakutat				1909	USGS Yakutat (D3)			A	Film Negative	https://digital.library.cornell.edu/catalog/ss:3322785
3322786	tve_exp1909_005	Icebergs stranded - Nunatak Glacier	Alaska	Yakutat	Nunatak Glacier			1909	USGS Yakutat (D3)	-138.966	59.8104	A+	Film Negative	https://digital.library.cornell.edu/catalog/ss:3322786
3322787	tve_exp1909_006	Nunatak Glacier and Hanging Valley from inside of fiord	Alaska	Yakutat	Nunatak Glacier			1909	USGS Yakutat (D3)	-138.966	59.8104	A+	Film Negative	https://digital.library.cornell.edu/catalog/ss:3322787
3322788	tve_exp1909_007	Hubbard Glacier From Gilberts 1000 Foot site	Alaska	Yakutat	Hubbard Glacier			1909	USGS Mount St. Elias (A4,A5)	-139.466	60.0247	C	Film Negative	https://digital.library.cornell.edu/catalog/ss:3322788
3322789	tve_exp1909_008	Moraine Variegated Glacier	Alaska	Yakutat	Variegated Glacier			1909	USGS Yakutat (D4)	-139.287	59.9999	B	Film Negative	https://digital.library.cornell.edu/catalog/ss:3322789
3919043	tve_exp1909_010_02	Variegated Glacier From new 1850 Foot site|shows consecutive moraine	Alaska	Yakutat	Variegated Glacier			1909	USGS Yakutat (D4)	-139.287	59.9999	B	Film Negative	https://digital.library.cornell.edu/catalog/ss:3919043
3322791	tve_exp1909_010	Variegated Glacier From new 1850 Foot site|shows consecutive moraine	Alaska	Yakutat	Variegated Glacier			1909	USGS Yakutat (D4)	-139.287	59.9999	B	Film Negative	https://digital.library.cornell.edu/catalog/ss:3322791
3322792	tve_exp1909_011	End of Hidden Gl from Valley side one of 1905 sites	Alaska	Yakutat	Hidden Glacier			1909	USGS Yakutat (D4)	-139.05	59.7003	B+	Film Negative	https://digital.library.cornell.edu/catalog/ss:3322792
3322793	tve_exp1909_012	Surface of Hidden Glacier from below 1905 site	Alaska	Yakutat	Hidden Glacier			1909	USGS Yakutat (D4)	-139.05	59.7003	B	Film Negative	https://digital.library.cornell.edu/catalog/ss:3322793
3322796	tve_exp1909_015	Stranded iceberg west side Yakutat Bay	Alaska	Yakutat				1909	USGS Yaktuat (D5)	-139.938	59.7818	B	Film Negative	https://digital.library.cornell.edu/catalog/ss:3322796
3322797	tve_exp1909_016	Turner Glacier west shore	Alaska	Yakutat	Turner Glacier			1909	USGS Mount St. Elias (A5)	-139.626	60.0271	C	Film Negative	https://digital.library.cornell.edu/catalog/ss:3322797
3322798	tve_exp1909_017	Turner Gl and shore line uplifted west shore	Alaska	Yakutat	Turner Glacier			1909	USGS Mount St. Elias (A5)	-139.626	60.0271	C	Film Negative	https://digital.library.cornell.edu/catalog/ss:3322798
3322799	tve_exp1909_018	Turner Glacier from elevation west shore	Alaska	Yakutat	Turner Glacier			1909	USGS Mount St. Elias (A5)	-139.626	60.0271	C	Film Negative	https://digital.library.cornell.edu/catalog/ss:3322799
3322800	tve_exp1909_019	Eastern margin of Atrevida from moraine	Alaska	Yakutat	Atrevida Glacier			1909	USGS Yaktuat (D5)	-139.787	59.9709	B	Film Negative	https://digital.library.cornell.edu/catalog/ss:3322800
3322801	tve_exp1909_020	Atrevida Glacier from moraine surface, showing healing crevasses	Alaska	Yakutat	Atrevida Glacier			1909	USGS Yaktuat (D5)	-139.787	59.9709	n/a	Film Negative	https://digital.library.cornell.edu/catalog/ss:3322801
3322802	tve_exp1909_021	Atrevida Glacier from moraine surface toward sea	Alaska	Yakutat	Atrevida Glacier			1909	USGS Yaktuat (D5)	-139.787	59.9709	B	Film Negative	https://digital.library.cornell.edu/catalog/ss:3322802
3322803	tve_exp1909_022	Bare surface ice of Atrevida Glacier crevasses healing	Alaska	Yakutat	Atrevida Glacier			1909	USGS Yaktuat (D5)	-139.787	59.9709	B	Film Negative	https://digital.library.cornell.edu/catalog/ss:3322803
3322804	tve_exp1909_023	Lucia and Atrevida toward sea from Terrace Point	Alaska	Yakutat	Lucia Glacier			1909	USGS Yaktuat (D5)	-139.892	60.0059	B	Film Negative	https://digital.library.cornell.edu/catalog/ss:3322804
3322805	tve_exp1909_024	Lucia Glacier from Terrace Point	Alaska	Yakutat	Lucia Glacier			1909	USGS Yaktuat (D5)	-139.892	60.0059	B	Film Negative	https://digital.library.cornell.edu/catalog/ss:3322805
3322806	tve_exp1909_025	Atrevida, Terrace Point 1906 site	Alaska	Yakutat	Atrevida Glacier			1909	USGS Yaktuat (D5)	-139.787	59.9709		Film Negative	https://digital.library.cornell.edu/catalog/ss:3322806
3322807	tve_exp1909_026	Depressed shore line Knight Island	Alaska	Yakutat				1909	USGS Yaktuat (C5)	-139.589	59.711	B	Film Negative	https://digital.library.cornell.edu/catalog/ss:3322807
3322808	tve_exp1909_027	Crevasses of Valdez Glacier Looking upvalley	Alaska	Prince William Sound	Valdez Glacier			1909	USGS Valdez (A6)	-146.173	61.2051	B	Film Negative	https://digital.library.cornell.edu/catalog/ss:3322808
3322809	tve_exp1909_028	Valdez Glacier looking out toward sea	Alaska	Prince William Sound	Valdez Glacier			1909	USGS Valdez (A6)	-146.173	61.2051	B	Film Negative	https://digital.library.cornell.edu/catalog/ss:3322809
3322810	tve_exp1909_029	Looking out toward sea over end of Valdez Glacier	Alaska	Prince William Sound	Valdez Glacier			1909	USGS Valdez (A6)	-146.173	61.2051	B+	Film Negative	https://digital.library.cornell.edu/catalog/ss:3322810
3322811	tve_exp1909_030	Valdez Glacier front from old terminal moraine	Alaska	Prince William Sound	Valdez Glacier			1909	USGS Valdez (A6)	-146.173	61.2051	B+	Film Negative	https://digital.library.cornell.edu/catalog/ss:3322811
3322812	tve_exp1909_031	Shoup Glacier from fiord	Alaska	Prince William Sound	Shoup Glacier			1909	USGS Valdez (A7)	-146.613	61.1808	A+	Film Negative	https://digital.library.cornell.edu/catalog/ss:3322812
3322813	tve_exp1909_032	Shoup Glacier from Grant site	Alaska	Prince William Sound	Shoup Glacier			1909	USGS Valdez (A7)	-146.613	61.1808	B	Film Negative	https://digital.library.cornell.edu/catalog/ss:3322813
3322814	tve_exp1909_033	Columbia Glacier advancing on forest from beach	Alaska	Prince William Sound	Columbia Glacier			1909	USGS Seward (D1)	-147.077	61.0958		Film Negative	https://digital.library.cornell.edu/catalog/ss:3322814
3322815	tve_exp1909_034	Columbia Glacier toward sea 1450 Foot site	Alaska	Prince William Sound	Columbia Glacier			1909	USGS Seward (D1)	-147.077	61.0958	B	Film Negative	https://digital.library.cornell.edu/catalog/ss:3322815
3322816	tve_exp1909_035	Columbia Glacier front - 1450 Foot site	Alaska	Prince William Sound	Columbia Glacier			1909	USGS Seward (D1)	-147.077	61.0958	B	Film Negative	https://digital.library.cornell.edu/catalog/ss:3322816
3322817	tve_exp1909_036	Columbia Glacier summit of Heather Island	Alaska	Prince William Sound	Columbia Glacier			1909	USGS Seward (D1)	-147.077	61.0958	A+	Film Negative	https://digital.library.cornell.edu/catalog/ss:3322817
3322818	tve_exp1909_037	Columbia Glacier triangulation site, Heather Is. #2	Alaska	Prince William Sound	Columbia Glacier			1909	USGS Seward (D1)	-147.077	61.0958	B	Film Negative	https://digital.library.cornell.edu/catalog/ss:3322818
3322819	tve_exp1909_038	Columbia Glacier triangulation site, Heather Is. #2	Alaska	Prince William Sound	Columbia Glacier			1909	USGS Seward (D1)	-147.077	61.0958	B	Film Negative	https://digital.library.cornell.edu/catalog/ss:3322819
3322820	tve_exp1909_039	Copper River R.R. trestle	Alaska	Chugach Mountains				1909	USGS Cordova			C	Film Negative	https://digital.library.cornell.edu/catalog/ss:3322820
3322821	tve_exp1909_040	Copper River R.R. and Glacier	Alaska	Chugach Mountains				1909	USGS Cordova			B	Film Negative	https://digital.library.cornell.edu/catalog/ss:3322821
3322822	tve_exp1909_041	Steamboat Landing and Glacier Copper River	Alaska	Chugach Mountains				1909	USGS Cordova			B	Film Negative	https://digital.library.cornell.edu/catalog/ss:3322822
3322823	tve_exp1909_042	Copper River	Alaska	Chugach Mountains				1909	USGS Cordova			B	Film Negative	https://digital.library.cornell.edu/catalog/ss:3322823
3322824	tve_exp1909_043	Copper River beach	Alaska	Chugach Mountains				1909	USGS Cordova			B	Film Negative	https://digital.library.cornell.edu/catalog/ss:3322824
3322825	tve_exp1909_044	Copper River rushing along	Alaska	Chugach Mountains				1909	USGS Cordova			B	Film Negative	https://digital.library.cornell.edu/catalog/ss:3322825
3322826	tve_exp1909_045	Miles Glacier Copper River	Alaska	Chugach Mountains	Miles Glacier			1909	USGS Cordova (C2)	-144.471	60.6582	C	Film Negative	https://digital.library.cornell.edu/catalog/ss:3322826
3322827	tve_exp1909_046	Surface of Glacier Copper River	Alaska	Chugach Mountains				1909	USGS Cordova			B	Film Negative	https://digital.library.cornell.edu/catalog/ss:3322827
3322828	tve_exp1909_047	Surface of Glacier Copper River	Alaska	Chugach Mountains				1909	USGS Cordova			A	Film Negative	https://digital.library.cornell.edu/catalog/ss:3322828
3322829	tve_exp1909_048	Fan of Glacier Copper River	Alaska	Chugach Mountains				1909	USGS Cordova			B	Film Negative	https://digital.library.cornell.edu/catalog/ss:3322829
3322830	tve_exp1909_049	Line of Copper River R.R.	Alaska	Chugach Mountains				1909	USGS Cordova			B	Film Negative	https://digital.library.cornell.edu/catalog/ss:3322830
3322831	tve_exp1909_050	Depressed Shoreline, Knight Island, sand beach and fallen trees	Alaska	Yakutat				1909	USGS Yakutat (C5)	-139.589	59.711	A+	Film Negative	https://digital.library.cornell.edu/catalog/ss:3322831
3322832	tve_exp1909_051	Avalanche from side of Galiano	Alaska	Yaktuat	Galiano Glacier			1909	USGS Yakutat (D5)	-139.715	59.9722	A+	Film Negative	https://digital.library.cornell.edu/catalog/ss:3322832
3322833	tve_exp1909_052	"Fountain jets" from ice of Galiano near avalanche slide	Alaska	Yakutat	Galiano Glacier			1909	USGS Yakutat (D5)	-139.715	59.9722	A+	Film Negative	https://digital.library.cornell.edu/catalog/ss:3322833
3322834	tve_exp1909_053	Turf rolls, Columbia Glacier push moraine	Alaska	Prince William Sound	Columbia Glacier			1909	USGS Seward (D1)	-147.077	61.0958	A+	Film Negative	https://digital.library.cornell.edu/catalog/ss:3322834
3322835	tve_exp1909_054	Tributary glacier to Valdez Glacier	Alaska	Prince William Sound	Valdez Glacier			1909	USGS Valdez (A6)	-146.173	61.2051	A+	Film Negative	https://digital.library.cornell.edu/catalog/ss:3322835
3322836	tve_exp1909_055	Marble Point Greenstone, rocky moutainous ridge	Alaska	Yakutat				1909	USGS Yakutat (D4)	-139.399	59.9376	A+	Film Negative	https://digital.library.cornell.edu/catalog/ss:3322836
3322837	tve_exp1909_056	Grooves made by iceberg dragging Columbia Glacier	Alaska	Prince William Sound	Columbia Glacier			1909	USGS Seward (D1)	-147.077	61.0958	A+	Film Negative	https://digital.library.cornell.edu/catalog/ss:3322837
3322838	tve_exp1909_057	Ice cave and stream, Atrevida	Alaska	Yakutat	Atrevida Glacier			1909	USGS Yaktuat (D5)	-139.787	59.9709	A+	Film Negative	https://digital.library.cornell.edu/catalog/ss:3322838
3322839	tve_exp1909_058	Lake on slope of mountain on side of Columbia Glacier	Alaska	Prince William Sound	Columbia Glacier			1909	USGS Seward (D1), Anchorage (A1)	-147.077	61.0958	A+	Film Negative	https://digital.library.cornell.edu/catalog/ss:3322839
3322840	tve_exp1909_059	Ice in trees, Columbia Glacier	Alaska	Prince William Sound	Columbia Glacier			1909	USGS Seward (D1)	-147.077	61.0958	A+	Film Negative	https://digital.library.cornell.edu/catalog/ss:3322840
3322841	tve_exp1909_060	Ice in trees, Columbia Glacier	Alaska	Prince William Sound	Columbia Glacier			1909	USGS Seward (D1)	-147.077	61.0958	A+	Film Negative	https://digital.library.cornell.edu/catalog/ss:3322841
3322842	tve_exp1909_061	Ice table on Valdez Glacier	Alaska	Prince William Sound	Valdez Glacier			1909	USGS Valdez (A6)	-146.173	61.2051	A+	Film Negative	https://digital.library.cornell.edu/catalog/ss:3322842
3322843	tve_exp1909_062	Push moraine along the edge of Shoup Glacier	Alaska	Prince William Sound	Shoup Glacier			1909	USGS Valdez (A7)	-146.613	61.1808	A+	Film Negative	https://digital.library.cornell.edu/catalog/ss:3322843
3322844	tve_exp1909_063	Atrevida ice cave on fan	Alaska	Yakutat	Atrevida Glacier			1909	USGS Yaktuat (D5)	-139.787	59.9709	B	Film Negative	https://digital.library.cornell.edu/catalog/ss:3322844
3322845	tve_exp1909_064	Prospectors sled on Valdez Glacier	Alaska	Prince William Sound	Valdez Glacier			1909	USGS Valdez (A6)	-146.173	61.2051		Film Negative	https://digital.library.cornell.edu/catalog/ss:3322845
3322846	tve_exp1909_065	Point of Columbia Glacier through trees	Alaska	Prince William Sound	Columbia Glacier			1909	USGS Seward (D1)	-147.077	61.0958	B	Film Negative	https://digital.library.cornell.edu/catalog/ss:3322846
3322847	tve_exp1909_066	Ice cave, Atrevida from distance	Alaska	Yakutat	Atrevida Glacier			1909	USGS Yaktuat (D5)	-139.787	59.9709		Film Negative	https://digital.library.cornell.edu/catalog/ss:3322847
3322848	tve_exp1909_067	Point of Columbia Glacier	Alaska	Prince William Sound, Valdez-Cordova, Alaska, United States	Columbia Glacier			1909	USGS Seward (D1)	-147.077	61.0958	B+	Film Negative	https://digital.library.cornell.edu/catalog/ss:3322848
3322849	tve_exp1909_068	Lateral push moraine, Hidden Glacier	Alaska	Yakutat	Hidden Glacier			1909	USGS Yakutat (D4)	-139.05	59.7003	B+	Film Negative	https://digital.library.cornell.edu/catalog/ss:3322849
3322850	tve_exp1909_069	Ice cliff of Shoup Glacier from side	Alaska	Prince William Sound	Shoup Glacier			1909	USGS Valdez (A7)	-146.613	61.1808	B+	Film Negative	https://digital.library.cornell.edu/catalog/ss:3322850
3322851	tve_exp1909_070	Vista of Glacier, Mt., Trees, lake. Columbia Glacier	Alaska	Prince William Sound	Columbia Glacier			1909	USGS Seward (D1), Anchorage (A1)	-147.077	61.0958	B+	Film Negative	https://digital.library.cornell.edu/catalog/ss:3322851
3322852	tve_exp1909_071	Debris laden berg, stranded West side of Yakutat Bay	Alaska	Yakutat				1909	USGS Yaktuat (D5)	-139.938	59.7818	B+	Film Negative	https://digital.library.cornell.edu/catalog/ss:3322852
3322853	tve_exp1909_072	Ice on trees - Columbia Glacier	Alaska	Prince William Sound	Columbia Glacier			1909	USGS Seward (D1)	-147.077	61.0958	B+	Film Negative	https://digital.library.cornell.edu/catalog/ss:3322853
3322854	tve_exp1909_073	Glaciated slate north shore of Nunatak Fiord	Alaska	Yakutat		5	July	1909	USGS Yakutat (D3)	-139.223	59.8459	B+	Film Negative	https://digital.library.cornell.edu/catalog/ss:3322854
3322855	tve_exp1909_074	Striations on Marble Point Ridge	Alaska	Yakutat		7	July	1909	USGS Yakutat (D4)	-139.399	59.9376	B+	Film Negative	https://digital.library.cornell.edu/catalog/ss:3322855
3322856	tve_exp1909_075	Icebergs in front of Nunatak Glacier	Alaska	Yakutat	Nunatak Glacier	9	July	1909	USGS Yakutat (D3)	-138.966	59.8104	B+	Film Negative	https://digital.library.cornell.edu/catalog/ss:3322856
3322857	tve_exp1909_076	Iceburg in Nunatak Fiord	Alaska	Yakutat		9	July	1909	USGS Yakutat (D3)	-139.223	59.8459	B+	Film Negative	https://digital.library.cornell.edu/catalog/ss:3322857
3322858	tve_exp1909_077	Nunatak Glacier	Alaska	Yakutat	Nunatak Glacier	9	July	1909	USGS Yakutat (D3)	-138.966	59.8104		Film Negative	https://digital.library.cornell.edu/catalog/ss:3322858
12582411	tve_exp1909_077b	[No Label: Likely End of Nunatak glacier highway]										Likely End of Nunatak glacier highway, showing sleds, snowshoes, boats, a stove and other abandonded impediments (see Martin, 1913, Fig. 4)		https://digital.library.cornell.edu/catalog/ss:12582411
3322859	tve_exp1909_078	Hubbard Glacier	Alaska	Yakutat	Hubbard Glacier	9	July	1909	USGS Mount St. Elias (A4,A5)	-139.466	60.0247		Film Negative	https://digital.library.cornell.edu/catalog/ss:3322859
8689430	tve_exp1909_078b	Hubbard Glacier	Alaska	Yakutat	Hubbard Glacier	9	July	1909	USGS Mount St. Elias (A4,A5)	-139.466	60.0247		Film Negative	https://digital.library.cornell.edu/catalog/ss:8689430
3322860	tve_exp1909_079	Hubbard Glacier	Alaska	Yakutat	Hubbard Glacier	9	July	1909	USGS Mount St. Elias (A4,A5)	-139.466	60.0247		Film Negative	https://digital.library.cornell.edu/catalog/ss:3322860
3322861	tve_exp1909_080	Hubbard Glacier	Alaska	Yakutat	Hubbard Glacier	9	July	1909	USGS Mount St. Elias (A4,A5)	-139.466	60.0247		Film Negative	https://digital.library.cornell.edu/catalog/ss:3322861
3322862	tve_exp1909_081	Variegated Glacier	Alaska	Yakutat	Variegated Glacier	10	July	1909	USGS Yakutat (D4)	-139.287	59.9999		Film Negative	https://digital.library.cornell.edu/catalog/ss:3322862
3322863	tve_exp1909_082	Variegated Glacier	Alaska	Yakutat	Variegated Glacier	10	July	1909	USGS Yakutat (D4)	-139.287	59.9999		Film Negative	https://digital.library.cornell.edu/catalog/ss:3322863
3322864	tve_exp1909_083	Variegated Glacier	Alaska	Yakutat	Variegated Glacier	10	July	1909	USGS Yakutat (D4)	-139.287	59.9999		Film Negative	https://digital.library.cornell.edu/catalog/ss:3322864
3322865	tve_exp1909_084	Variegated Glacier	Alaska	Yakutat	Variegated Glacier	10	July	1909	USGS Yakutat (D4)	-139.287	59.9999		Film Negative	https://digital.library.cornell.edu/catalog/ss:3322865
3322866	tve_exp1909_085	Hidden Glacier	Alaska	Yakutat	Hidden Glacier	10	July	1909	USGS Yakutat (D4)	-139.05	59.7003		Film Negative	https://digital.library.cornell.edu/catalog/ss:3322866
3322867	tve_exp1909_086	Hidden Glacier	Alaska	Yakutat	Hidden Glacier	10	July	1909	USGS Yakutat (D4)	-139.05	59.7003		Film Negative	https://digital.library.cornell.edu/catalog/ss:3322867
3322868	tve_exp1909_087	Hidden Glacier	Alaska	Yakutat	Hidden Glacier	10	July	1909	USGS Yakutat (D4)	-139.05	59.7003		Film Negative	https://digital.library.cornell.edu/catalog/ss:3322868
3322869	tve_exp1909_088	Hidden Glacier	Alaska	Yakutat	Hidden Glacier	10	July	1909	USGS Yakutat (D4)	-139.05	59.7003		Film Negative	https://digital.library.cornell.edu/catalog/ss:3322869
3322870	tve_exp1909_089	Hidden Glacier	Alaska	Yakutat	Hidden Glacier	10	July	1909	USGS Yakutat (D4)	-139.05	59.7003		Film Negative	https://digital.library.cornell.edu/catalog/ss:3322870
3322871	tve_exp1909_090	Hidden Glacier	Alaska	Yakutat	Hidden Glacier	11	July	1909	USGS Yakutat (D4)	-139.05	59.7003		Film Negative	https://digital.library.cornell.edu/catalog/ss:3322871
3322872	tve_exp1909_091	Hidden Glacier	Alaska	Yakutat	Hidden Glacier	11	July	1909	USGS Yakutat (D4)	-139.05	59.7003		Film Negative	https://digital.library.cornell.edu/catalog/ss:3322872
3322873	tve_exp1909_092	Hidden Glacier	Alaska	Yakutat	Hidden Glacier	11	July	1909	USGS Yakutat (D4)	-139.05	59.7003		Film Negative	https://digital.library.cornell.edu/catalog/ss:3322873
3322874	tve_exp1909_093	Hidden Glacier	Alaska	Yakutat	Hidden Glacier	11	July	1909	USGS Yakutat (D4)	-139.05	59.7003		Film Negative	https://digital.library.cornell.edu/catalog/ss:3322874
3322875	tve_exp1909_094	Variegated Glacier	Alaska	Yakutat	Variegated Glacier	14	July	1909	USGS Yakutat (D4)	-139.287	59.9999		Film Negative	https://digital.library.cornell.edu/catalog/ss:3322875
3322876	tve_exp1909_095	Variegated Glacier	Alaska	Yakutat	Variegated Glacier	14	July	1909	USGS Yakutat (D4)	-139.287	59.9999		Film Negative	https://digital.library.cornell.edu/catalog/ss:3322876
3322877	tve_exp1909_096	Variegated Glacier	Alaska	Yakutat	Variegated Glacier	15	July	1909	USGS Yakutat (D4)	-139.287	59.9999		Film Negative	https://digital.library.cornell.edu/catalog/ss:3322877
3322878	tve_exp1909_097	Variegated Glacier	Alaska	Yakutat	Variegated Glacier	15	July	1909	USGS Yakutat (D4)	-139.287	59.9999		Film Negative	https://digital.library.cornell.edu/catalog/ss:3322878
3322879	tve_exp1909_098	Variegated Glacier	Alaska	Yakutat	Variegated Glacier	15	July	1909	USGS Yakutat (D4)	-139.287	59.9999		Film Negative	https://digital.library.cornell.edu/catalog/ss:3322879
3322880	tve_exp1909_099	Variegated Glacier	Alaska	Yakutat	Variegated Glacier	15	July	1909	USGS Yakutat (D4)	-139.287	59.9999		Film Negative	https://digital.library.cornell.edu/catalog/ss:3322880
3322881	tve_exp1909_100	Hidden	Alaska	Yakutat	Hidden Glacier	15	July	1909	USGS Yakutat (D4)	-139.05	59.7003		Film Negative	https://digital.library.cornell.edu/catalog/ss:3322881
3322882	tve_exp1909_101	Hidden	Alaska	Yakutat	Hidden Glacier	15	July	1909	USGS Yakutat (D4)	-139.05	59.7003		Film Negative	https://digital.library.cornell.edu/catalog/ss:3322882
3322883	tve_exp1909_102	Hidden	Alaska	Yakutat	Hidden Glacier	15	July	1909	USGS Yakutat (D4)	-139.05	59.7003		Film Negative	https://digital.library.cornell.edu/catalog/ss:3322883
3322884	tve_exp1909_103	Hidden	Alaska	Yakutat	Hidden Glacier	15	July	1909	USGS Yakutat (D4)	-139.05	59.7003		Film Negative	https://digital.library.cornell.edu/catalog/ss:3322884
3322885	tve_exp1909_104	Hidden	Alaska	Yakutat	Hidden Glacier	16	July	1909	USGS Yakutat (D4)	-139.05	59.7003		Film Negative	https://digital.library.cornell.edu/catalog/ss:3322885
3322886	tve_exp1909_105	Hidden	Alaska	Yakutat	Hidden Glacier	18	July	1909	USGS Yakutat (D4)	-139.05	59.7003		Film Negative	https://digital.library.cornell.edu/catalog/ss:3322886
3322887	tve_exp1909_106	Hidden	Alaska	Yakutat	Hidden Glacier	18	July	1909	USGS Yakutat (D4)	-139.05	59.7003		Film Negative	https://digital.library.cornell.edu/catalog/ss:3322887
3322888	tve_exp1909_107	Hidden	Alaska	Yakutat	Hidden Glacier	18	July	1909	USGS Yakutat (D4)	-139.05	59.7003		Film Negative	https://digital.library.cornell.edu/catalog/ss:3322888
3322889	tve_exp1909_108	Fourth Glacier	Alaska	Yakutat	Fourth Glacier	18	July	1909	USGS Yakutat (C4)	-139.097	59.6474		Film Negative	https://digital.library.cornell.edu/catalog/ss:3322889
3322890	tve_exp1909_109	Fourth Glacier not Beasley	Alaska	Yakutat	Fourth Glacier	18	July	1909	USGS Yakutat (C4)	-139.097	59.6474		Film Negative	https://digital.library.cornell.edu/catalog/ss:3322890
3322891	tve_exp1909_110	Inclusive Fourth Glacier	Alaska	Yakutat	Fourth Glacier	18	July	1909	USGS Yakutat (C4)	-139.097	59.6474		Film Negative	https://digital.library.cornell.edu/catalog/ss:3322891
3322892	tve_exp1909_111	Inclusive Fourth Glacier	Alaska	Yakutat	Fourth Glacier	18	July	1909	USGS Yakutat (C4)	-139.097	59.6474		Film Negative	https://digital.library.cornell.edu/catalog/ss:3322892
3322893	tve_exp1909_112	Inclusive Fourth Glacier	Alaska	Yakutat	Fourth Glacier	18	July	1909	USGS Yakutat (C4)	-139.097	59.6474		Film Negative	https://digital.library.cornell.edu/catalog/ss:3322893
3322894	tve_exp1909_113	Inclusive Fourth Glacier	Alaska	Yakutat	Fourth Glacier			1909	USGS Yakutat (C4)	-139.097	59.6474		Film Negative	https://digital.library.cornell.edu/catalog/ss:3322894
3322895	tve_exp1909_114	Inclusive Fourth Glacier	Alaska	Yakutat	Fourth Glacier			1909	USGS Yakutat (C4)	-139.097	59.6474		Film Negative	https://digital.library.cornell.edu/catalog/ss:3322895
3322896	tve_exp1909_115	Inclusive Fourth Glacier	Alaska	Yakutat	Fourth Glacier	28	July	1909	USGS Yakutat (C4)	-139.097	59.6474		Film Negative	https://digital.library.cornell.edu/catalog/ss:3322896
3322897	tve_exp1909_116	Inclusive Fourth Glacier	Alaska	Yakutat	Fourth Glacier	28	July	1909	USGS Yakutat (C4)	-139.097	59.6474		Film Negative	https://digital.library.cornell.edu/catalog/ss:3322897
9059576	tve_exp1909_116b	M-14, Galiano Gl, July --, 1909,	Alaska	Yakutat	Galiano Glacier		July	1909	USGS Yakutat (D5)	-139.715	59.9722		Film Negative	https://digital.library.cornell.edu/catalog/ss:9059576
9059577	tve_exp1909_116c	M-14, Stumps Galiano Gl.	Alaska	Yakutat	Galiano Glacier		July	1909	USGS Yakutat (D5)	-139.715	59.9722		Film Negative	https://digital.library.cornell.edu/catalog/ss:9059577
9059579	tve_exp1909_116d	M-14, Black Gl July-- ,	Alaska	Yakutat	Black Glacier		July	1909	USGS Yakutat (D5)	-139.66	0722351 59.95439044547405		Film Negative	https://digital.library.cornell.edu/catalog/ss:9059579
9059580	tve_exp1909_116e	M-14, Black Gl, July--	Alaska	Yakutat	Black Glacier			1909	USGS Yakutat (D5)	-139.66	0722351 59.95439044547405		Film Negative	https://digital.library.cornell.edu/catalog/ss:9059580
3322898	tve_exp1909_117	Ice along shore	Alaska	Yakutat		28	July	1909	USGS Yakutat (D5)				Film Negative	https://digital.library.cornell.edu/catalog/ss:3322898
3322899	tve_exp1909_118	Ice along shore at camp	Alaska	Yakutat		28	July	1909	USGS Yakutat (D5)				Film Negative	https://digital.library.cornell.edu/catalog/ss:3322899
3322900	tve_exp1909_119	Esker stream	Alaska	Yakutat				1909	USGS Yakutat (D5)	-139.735	59.909		Film Negative	https://digital.library.cornell.edu/catalog/ss:3322900
3322901	tve_exp1909_120	Esker stream	Alaska	Yakutat		31	July	1909	USGS Yakutat (D5)	-139.735	59.909		Film Negative	https://digital.library.cornell.edu/catalog/ss:3322901
3322902	tve_exp1909_121	Atrevida Glacier	Alaska	Yakutat	Atrevida Glacier	31	July	1909	USGS Yakutat (D5)	-139.787	59.9709		Film Negative	https://digital.library.cornell.edu/catalog/ss:3322902
3322903	tve_exp1909_122	Atrevida Glacier	Alaska	Yakutat	Atrevida Glacier	31	July	1909	USGS Yakutat (D5)	-139.787	59.9709		Film Negative	https://digital.library.cornell.edu/catalog/ss:3322903
3322904	tve_exp1909_123	Atrevida Glacier	Alaska	Yakutat	Atrevida Glacier	31	July	1909	USGS Yakutat (D5)	-139.787	59.9709		Film Negative	https://digital.library.cornell.edu/catalog/ss:3322904
3322905	tve_exp1909_124	Surf and bergs	Alaska	Yakutat		1	August	1909	USGS Yakutat (D5)				Film Negative	https://digital.library.cornell.edu/catalog/ss:3322905
3322906	tve_exp1909_125	Surf and bergs	Alaska	Yakutat		1	August	1909	USGS Yakutat (D5)				Film Negative	https://digital.library.cornell.edu/catalog/ss:3322906
3322907	tve_exp1909_126	Surf and bergs	Alaska	Yakutat		1	August	1909	USGS Yakutat (D5)				Film Negative	https://digital.library.cornell.edu/catalog/ss:3322907
3322908	tve_exp1909_127	Icebergs	Alaska	Yakutat		1	August	1909	USGS Yakutat (D5)				Film Negative	https://digital.library.cornell.edu/catalog/ss:3322908
3322909	tve_exp1909_128	Back of camp	Alaska	Yakutat		3	August	1909	USGS Yakutat (D5)				Film Negative	https://digital.library.cornell.edu/catalog/ss:3322909
3322910	tve_exp1909_129	Back of camp	Alaska	Yakutat		3	August	1909	USGS Yakutat (D5)				Film Negative	https://digital.library.cornell.edu/catalog/ss:3322910
3322911	tve_exp1909_130	Back of camp	Alaska	Yakutat		3	August	1909	USGS Yakutat (D5)				Film Negative	https://digital.library.cornell.edu/catalog/ss:3322911
3322912	tve_exp1909_131	Back of camp	Alaska	Yakutat		3	August	1909	USGS Yakutat (D5)				Film Negative	https://digital.library.cornell.edu/catalog/ss:3322912
3322913	tve_exp1909_132	Atrevida	Alaska	Yakutat	Atrevida Glacier	3	August	1909	USGS Yakutat (D5)	-139.787	59.9709		Film Negative	https://digital.library.cornell.edu/catalog/ss:3322913
3322914	tve_exp1909_133	Atrevida	Alaska	Yakutat	Atrevida Glacier	3	August	1909	USGS Yakutat (D5)	-139.787	59.9709		Film Negative	https://digital.library.cornell.edu/catalog/ss:3322914
3322915	tve_exp1909_134	Atrevida from Terrace Point	Alaska	Yakutat	Atrevida Glacier	3	August	1909	USGS Yakutat (D5)	-139.787	59.9709		Film Negative	https://digital.library.cornell.edu/catalog/ss:3322915
3322916	tve_exp1909_135	Crevassed Lucia Glacier from Terrace Point	Alaska	Yakutat	Lucia Glacier	18	August	1909	USGS Yakutat (D5)	-139.892	60.0059		Film Negative	https://digital.library.cornell.edu/catalog/ss:3322916
3322917	tve_exp1909_136	Lucia from Terrace Point	Alaska	Yakutat	Lucia Glacier	18	August	1909	USGS Yakutat (D5)	-139.892	60.0059		Film Negative	https://digital.library.cornell.edu/catalog/ss:3322917
3322918	tve_exp1909_137	Lucia from Terrace Point	Alaska	Yakutat	Lucia Glacier	18	August	1909	USGS Yakutat (D5)	-139.892	60.0059		Film Negative	https://digital.library.cornell.edu/catalog/ss:3322918
3322919	tve_exp1909_138	Terrace Point	Alaska	Yakutat		18	August	1909	USGS Yakutat (D5)	-139.839	59.957		Film Negative	https://digital.library.cornell.edu/catalog/ss:3322919
3322920	tve_exp1909_139	Valdez Glacier	Alaska	Prince William Sound	Valdez Glacier	18	August	1909	USGS Valdez (A6)	-146.173	61.2051		Film Negative	https://digital.library.cornell.edu/catalog/ss:3322920
3322921	tve_exp1909_140	Valdez Glacier	Alaska	Prince William Sound	Valdez Glacier	18	August	1909	USGS Valdez (A6)	-146.173	61.2051		Film Negative	https://digital.library.cornell.edu/catalog/ss:3322921
3322922	tve_exp1909_141	Valdez Glacier	Alaska	Prince William Sound	Valdez Glacier	18	August	1909	USGS Valdez (A6)	-146.173	61.2051		Film Negative	https://digital.library.cornell.edu/catalog/ss:3322922
3322923	tve_exp1909_142	Valdez Glacier	Alaska	Prince William Sound	Valdez Glacier	18	August	1909	USGS Valdez (A6)	-146.173	61.2051		Film Negative	https://digital.library.cornell.edu/catalog/ss:3322923
3322924	tve_exp1909_195	Valdez Glacier	Alaska	Prince William Sound	Valdez Glacier	18	August	1909	USGS Valdez (A6)	-146.173	61.2051		Film Negative	https://digital.library.cornell.edu/catalog/ss:3322924
3322925	tve_exp1909_195	Valdez Glacier	Alaska	Prince William Sound	Valdez Glacier	18	August	1909	USGS Valdez (A6)	-146.173	61.2051		Film Negative	https://digital.library.cornell.edu/catalog/ss:3322925
3322926	tve_exp1909_195	Drained lake at border of Valdez Glacier	Alaska	Prince William Sound	Valdez Glacier	19	August	1909	USGS Valdez (A6)	-146.173	61.2051		Film Negative	https://digital.library.cornell.edu/catalog/ss:3322926
3322927	tve_exp1909_195	Valdez Glacier	Alaska	Prince William Sound	Valdez Glacier	19	August	1909	USGS Valdez (A6)	-146.173	61.2051		Film Negative	https://digital.library.cornell.edu/catalog/ss:3322927
3322928	tve_exp1909_147	Valdez Glacier	Alaska	Prince William Sound	Valdez Glacier	19	August	1909	USGS Valdez (A6)	-146.173	61.2051		Film Negative	https://digital.library.cornell.edu/catalog/ss:3322928
3322929	tve_exp1909_148	Valdez Glacier	Alaska	Prince William Sound	Valdez Glacier	19	August	1909	USGS Valdez (A6)	-146.173	61.2051		Film Negative	https://digital.library.cornell.edu/catalog/ss:3322929
3322930	tve_exp1909_149	Valdez Fiord	Alaska	Prince William Sound		19	August	1909	USGS Valdez (A7)	-146.51	61.1014		Film Negative	https://digital.library.cornell.edu/catalog/ss:3322930
3322931	tve_exp1909_150	Shoup Glacier	Alaska	Prince William Sound	Shoup Glacier	19	August	1909	USGS Valdez (A7)	-146.613	61.1808		Film Negative	https://digital.library.cornell.edu/catalog/ss:3322931
3322932	tve_exp1909_344	Shoup Glacier	Alaska	Prince William Sound	Shoup Glacier	19	August	1909	USGS Valdez (A7)	-146.613	61.1808		Film Negative	https://digital.library.cornell.edu/catalog/ss:3322932
3322933	tve_exp1909_345	Shoup Glacier	Alaska	Prince William Sound	Shoup Glacier	19	August	1909	USGS Valdez (A7)	-146.613	61.1808		Film Negative	https://digital.library.cornell.edu/catalog/ss:3322933
3322934	tve_exp1909_153	Catspaw Glacier, Valdez Fiord	Alaska	Prince William Sound	Catspaw Glacier	19	August	1909	USGS Valdez (A7)				Film Negative	https://digital.library.cornell.edu/catalog/ss:3322934
3322935	tve_exp1909_154	Shoup	Alaska	Prince William Sound	Shoup Glacier	19	August	1909	USGS Valdez (A7)	-146.613	61.1808		Film Negative	https://digital.library.cornell.edu/catalog/ss:3322935
3322936	tve_exp1909_155	Shoup	Alaska	Prince William Sound	Shoup Glacier	19	August	1909	USGS Valdez (A7)	-146.613	61.1808		Film Negative	https://digital.library.cornell.edu/catalog/ss:3322936
3322937	tve_exp1909_156	Shoup	Alaska	Prince William Sound	Shoup Glacier	19	August	1909	USGS Valdez (A7)	-146.613	61.1808		Film Negative	https://digital.library.cornell.edu/catalog/ss:3322937
3322938	tve_exp1909_157	Shoup	Alaska	Prince William Sound	Shoup Glacier	20	August	1909	USGS Valdez (A7)	-146.613	61.1808		Film Negative	https://digital.library.cornell.edu/catalog/ss:3322938
3322939	tve_exp1909_158	Shoup	Alaska	Prince William Sound	Shoup Glacier	20	August	1909	USGS Valdez (A7)	-146.613	61.1808		Film Negative	https://digital.library.cornell.edu/catalog/ss:3322939
3322940	tve_exp1909_159	Shoup Glacier	Alaska	Prince William Sound	Shoup Glacier	20	August	1909	USGS Valdez (A7)	-146.613	61.1808		Film Negative	https://digital.library.cornell.edu/catalog/ss:3322940
3322941	tve_exp1909_160	Shoup Glacier	Alaska	Prince William Sound	Shoup Glacier	20	August	1909	USGS Valdez (A7)	-146.613	61.1808		Film Negative	https://digital.library.cornell.edu/catalog/ss:3322941
3322942	tve_exp1909_161	Shoup	Alaska	Prince William Sound	Shoup Glacier	20	August	1909	USGS Valdez (A7)	-146.613	61.1808		Film Negative	https://digital.library.cornell.edu/catalog/ss:3322942
3322943	tve_exp1909_162	Shoup	Alaska	Prince William Sound	Shoup Glacier	20	August	1909	USGS Valdez (A7)	-146.613	61.1808		Film Negative	https://digital.library.cornell.edu/catalog/ss:3322943
3322944	tve_exp1909_163	Shoup	Alaska	Prince William Sound	Shoup Glacier	20	August	1909	USGS Valdez (A7)	-146.613	61.1808		Film Negative	https://digital.library.cornell.edu/catalog/ss:3322944
3322945	tve_exp1909_164	Shoup	Alaska	Prince William Sound	Shoup Glacier	23	August	1909	USGS Valdez (A7)	-146.613	61.1808		Film Negative	https://digital.library.cornell.edu/catalog/ss:3322945
3322946	tve_exp1909_165	Shoup	Alaska	Prince William Sound	Shoup Glacier	23	August	1909	USGS Valdez (A7)	-146.613	61.1808		Film Negative	https://digital.library.cornell.edu/catalog/ss:3322946
3322947	tve_exp1909_166	Shoup	Alaska	Prince William Sound	Shoup Glacier	23	August	1909	USGS Valdez (A7)	-146.613	61.1808		Film Negative	https://digital.library.cornell.edu/catalog/ss:3322947
3322948	tve_exp1909_167	Shoup	Alaska	Prince William Sound	Shoup Glacier	22	August	1909	USGS Valdez (A7)	-146.613	61.1808		Film Negative	https://digital.library.cornell.edu/catalog/ss:3322948
3322949	tve_exp1909_168	West edge Columbia Glacier	Alaska	Prince William Sound	Columbia Glacier	22	August	1909	USGS Seward (D1), Anchorage (A1)	-147.077	61.0958		Film Negative	https://digital.library.cornell.edu/catalog/ss:3322949
3322950	tve_exp1909_169	Columbia	Alaska	Prince William Sound	Columbia Glacier	22	August	1909	USGS Seward (D1), Anchorage (A1)	-147.077	61.0958		Film Negative	https://digital.library.cornell.edu/catalog/ss:3322950
3322951	tve_exp1909_170	Columbia	Alaska	Prince William Sound	Columbia Glacier	22	August	1909	USGS Seward (D1), Anchorage (A1)	-147.077	61.0958		Film Negative	https://digital.library.cornell.edu/catalog/ss:3322951
3322952	tve_exp1909_171	Columbia	Alaska	Prince William Sound	Columbia Glacier	22	August	1909	USGS Seward (D1), Anchorage (A1)	-147.077	61.0958		Film Negative	https://digital.library.cornell.edu/catalog/ss:3322952
3322953	tve_exp1909_172	Columbia	Alaska	Prince William Sound	Columbia Glacier	23	August	1909	USGS Seward (D1), Anchorage (A1)	-147.077	61.0958		Film Negative	https://digital.library.cornell.edu/catalog/ss:3322953
3322954	tve_exp1909_173	Columbia	Alaska	Prince William Sound	Columbia Glacier	23	August	1909	USGS Seward (D1), Anchorage (A1)	-147.077	61.0958		Film Negative	https://digital.library.cornell.edu/catalog/ss:3322954
3322955	tve_exp1909_174	Columbia	Alaska	Prince William Sound	Columbia Glacier	23	August	1909	USGS Seward (D1), Anchorage (A1)	-147.077	61.0958		Film Negative	https://digital.library.cornell.edu/catalog/ss:3322955
3322956	tve_exp1909_175	Columbia	Alaska	Prince William Sound	Columbia Glacier	23	August	1909	USGS Seward (D1), Anchorage (A1)	-147.077	61.0958		Film Negative	https://digital.library.cornell.edu/catalog/ss:3322956
3322957	tve_exp1909_176	Columbia	Alaska	Prince William Sound	Columbia Glacier	23	August	1909	USGS Seward (D1), Anchorage (A1)	-147.077	61.0958		Film Negative	https://digital.library.cornell.edu/catalog/ss:3322957
3322958	tve_exp1909_177	Columbia	Alaska	Prince William Sound	Columbia Glacier	23	August	1909	USGS Seward (D1), Anchorage (A1)	-147.077	61.0958		Film Negative	https://digital.library.cornell.edu/catalog/ss:3322958
3322959	tve_exp1909_178	Columbia	Alaska	Prince William Sound	Columbia Glacier	23	August	1909	USGS Seward (D1), Anchorage (A1)	-147.077	61.0958		Film Negative	https://digital.library.cornell.edu/catalog/ss:3322959
3322960	tve_exp1909_179	Columbia	Alaska	Prince William Sound	Columbia Glacier	23	August	1909	USGS Seward (D1), Anchorage (A1)	-147.077	61.0958		Film Negative	https://digital.library.cornell.edu/catalog/ss:3322960
3322961	tve_exp1909_181	Columbia	Alaska	Prince William Sound	Columbia Glacier	23	August	1909	USGS Seward (D1), Anchorage (A1)	-147.077	61.0958		Film Negative	https://digital.library.cornell.edu/catalog/ss:3322961
3322962	tve_exp1909_182	Columbia	Alaska	Prince William Sound	Columbia Glacier	23	August	1909	USGS Seward (D1), Anchorage (A1)	-147.077	61.0958		Film Negative	https://digital.library.cornell.edu/catalog/ss:3322962
3322963	tve_exp1909_183	Columbia	Alaska	Prince William Sound	Columbia Glacier	23	August	1909	USGS Seward (D1), Anchorage (A1)	-147.077	61.0958		Film Negative	https://digital.library.cornell.edu/catalog/ss:3322963
3322964	tve_exp1909_184	Columbia	Alaska	Prince William Sound	Columbia Glacier	23	August	1909	USGS Seward (D1), Anchorage (A1)	-147.077	61.0958		Film Negative	https://digital.library.cornell.edu/catalog/ss:3322964
3322965	tve_exp1909_185	Columbia	Alaska	Prince William Sound	Columbia Glacier	23	August	1909	USGS Seward (D1), Anchorage (A1)	-147.077	61.0958		Film Negative	https://digital.library.cornell.edu/catalog/ss:3322965
3322966	tve_exp1909_186	Columbia	Alaska	Prince William Sound	Columbia Glacier	23	August	1909	USGS Seward (D1), Anchorage (A1)	-147.077	61.0958		Film Negative	https://digital.library.cornell.edu/catalog/ss:3322966
3322967	tve_exp1909_187	Columbia	Alaska	Prince William Sound	Columbia Glacier	24	August	1909	USGS Seward (D1), Anchorage (A1)	-147.077	61.0958		Film Negative	https://digital.library.cornell.edu/catalog/ss:3322967
3322968	tve_exp1909_188	Columbia	Alaska	Prince William Sound	Columbia Glacier	24	August	1909	USGS Seward (D1), Anchorage (A1)	-147.077	61.0958		Film Negative	https://digital.library.cornell.edu/catalog/ss:3322968
3322969	tve_exp1909_189	Columbia Glacier from one of Curtis sites	Alaska	Prince William Sound	Columbia Glacier	24	August	1909	USGS Seward (D1), Anchorage (A1)	-147.077	61.0958		Film Negative	https://digital.library.cornell.edu/catalog/ss:3322969
3322970	tve_exp1909_190	Columbia	Alaska	Prince William Sound	Columbia Glacier	24	August	1909	USGS Seward (D1), Anchorage (A1)	-147.077	61.0958		Film Negative	https://digital.library.cornell.edu/catalog/ss:3322970
3322971	tve_exp1909_191	Columbia	Alaska	Prince William Sound	Columbia Glacier	24	August	1909	USGS Seward (D1), Anchorage (A1)	-147.077	61.0958		Film Negative	https://digital.library.cornell.edu/catalog/ss:3322971
3322972	tve_exp1909_192	Columbia	Alaska	Prince William Sound	Columbia Glacier			1909	USGS Seward (D1), Anchorage (A1)	-147.077	61.0958		Film Negative	https://digital.library.cornell.edu/catalog/ss:3322972
3322973	tve_exp1909_193	Columbia	Alaska	Prince William Sound	Columbia Glacier	28	August	1909	USGS Seward (D1), Anchorage (A1)	-147.077	61.0958		Film Negative	https://digital.library.cornell.edu/catalog/ss:3322973
3322974	tve_exp1909_194	Columbia	Alaska	Prince William Sound	Columbia Glacier	28	August	1909	USGS Seward (D1), Anchorage (A1)	-147.077	61.0958		Film Negative	https://digital.library.cornell.edu/catalog/ss:3322974
3322975	tve_exp1909_195	Columbia	Alaska	Prince William Sound	Columbia Glacier	28	August	1909	USGS Seward (D1), Anchorage (A1)	-147.077	61.0958		Film Negative	https://digital.library.cornell.edu/catalog/ss:3322975
3322976	tve_exp1909_196	Miles Glacier	Alaska	Chugach Mountains	Miles Glacier	28	August	1909	USGS Cordova (C2)	-144.471	60.6582		Film Negative	https://digital.library.cornell.edu/catalog/ss:3322976
3322977	tve_exp1909_197	Baird Glacier	Alaska	Chugach Mountains	Baird Glacier	28	August	1909	USGS Cordova (D2)	-144.684	60.7879	Allen glacier is now the accepted name for Baird	Film Negative	https://digital.library.cornell.edu/catalog/ss:3322977
3322978	tve_exp1909_198	Baird Glacier	Alaska	Chugach Mountains	Baird Glacier	28	August	1909	USGS Cordova (D2)	-144.684	60.7879	Allen glacier is now the accepted name for Baird	Film Negative	https://digital.library.cornell.edu/catalog/ss:3322978
3322980	tve_exp1909_200	Baird Glacier	Alaska	Chugach Mountains	Baird Glacier	28	August	1909	USGS Cordova (D2)	-144.684	60.7879	Allen glacier is now the accepted name for Baird	Film Negative	https://digital.library.cornell.edu/catalog/ss:3322980
9126010	tve_exp1909_201_02	Baird Glacier	Alaska	Chugach Mountains	Baird Glacier	28	August	1909	USGS Cordova (D2)	-144.684	60.7879	Allen glacier is now the accepted name for Baird	Film Negative	https://digital.library.cornell.edu/catalog/ss:9126010
3322981	tve_exp1909_201	Baird Glacier	Alaska	Chugach Mountains	Baird Glacier	28	August	1909	USGS Cordova (D2)	-144.684	60.7879	Allen glacier is now the accepted name for Baird	Film Negative	https://digital.library.cornell.edu/catalog/ss:3322981
3322982	tve_exp1909_202	Baird Glacier	Alaska	Chugach Mountains	Baird Glacier	28	August	1909	USGS Cordova (D2)	-144.684	60.7879	Allen glacier is now the accepted name for Baird	Film Negative	https://digital.library.cornell.edu/catalog/ss:3322982
3322983	tve_exp1909_203	Miles Glacier	Alaska	Chugach Mountains	Miles Glacier	28	August	1909	USGS Cordova (C2)	-144.471	60.6582		Film Negative	https://digital.library.cornell.edu/catalog/ss:3322983
3322984	tve_exp1909_204	Miles Glacier	Alaska	Chugach Mountains	Miles Glacier	19	June	1909	USGS Cordova (C2)	-144.471	60.6582		Film Negative	https://digital.library.cornell.edu/catalog/ss:3322984
3322985	tve_exp1909_205	Miles Glacier	Alaska	Chugach Mountains	Miles Glacier	19	June	1909	USGS Cordova (C2)	-144.471	60.6582		Film Negative	https://digital.library.cornell.edu/catalog/ss:3322985
3322986	tve_exp1909_206	Miles Glacier	Alaska	Chugach Mountains	Miles Glacier	19	June	1909	USGS Cordova (C2)	-144.471	60.6582		Film Negative	https://digital.library.cornell.edu/catalog/ss:3322986
3322987	tve_exp1909_207	Miles Glacier	Alaska	Chugach Mountains	Miles Glacier	19	June	1909	USGS Cordova (C2)	-144.471	60.6582		Film Negative	https://digital.library.cornell.edu/catalog/ss:3322987
3322988	tve_exp1909_208	Canadian Pacific RR	Canada			19	June	1909					Film Negative	https://digital.library.cornell.edu/catalog/ss:3322988
3322989	tve_exp1909_209	Canadian Pacific RR	Canada			26	June	1909					Film Negative	https://digital.library.cornell.edu/catalog/ss:3322989
3322990	tve_exp1909_210	Canadian Pacific RR	Canada					1909					Film Negative	https://digital.library.cornell.edu/catalog/ss:3322990
3322991	tve_exp1909_211	Canadian Pacific RR	Canada			29	June	1909					Film Negative	https://digital.library.cornell.edu/catalog/ss:3322991
9126011	tve_exp1909_212_2	Canadian Pacific RR	Canada			29	June	1909					Film Negative	https://digital.library.cornell.edu/catalog/ss:9126011
3322992	tve_exp1909_212	Canadian Pacific RR	Canada			29	June	1909					Film Negative	https://digital.library.cornell.edu/catalog/ss:3322992
3322993	tve_exp1909_213	On the Portland				29	June	1909					Film Negative	https://digital.library.cornell.edu/catalog/ss:3322993
3322994	tve_exp1909_214	Hanging Valley, Seaside Passage				29	June	1909					Film Negative	https://digital.library.cornell.edu/catalog/ss:3322994
3322995	tve_exp1909_215	Fairweather	Alaska	Southern Panhandle		29	June	1909	USGS Mount Fairweather (D5)	-137.543	58.907		Film Negative	https://digital.library.cornell.edu/catalog/ss:3322995
3322996	tve_exp1909_216	Fairweather	Alaska	Southern Panhandle		3	July	1909	USGS Mount Fairweather (D5)	-137.543	58.907		Film Negative	https://digital.library.cornell.edu/catalog/ss:3322996
3322997	tve_exp1909_217	Fairweather	Alaska	Southern Panhandle		3	July	1909	USGS Mount Fairweather (D5)	-137.543	58.907		Film Negative	https://digital.library.cornell.edu/catalog/ss:3322997
3322998	tve_exp1909_218	Fairweather	Alaska	Southern Panhandle		3	July	1909	USGS Mount Fairweather (D5)	-137.543	58.907		Film Negative	https://digital.library.cornell.edu/catalog/ss:3322998
3322999	tve_exp1909_219	Fairweather	Alaska	Southern Panhandle		3	July	1909	USGS Mount Fairweather (D5)	-137.543	58.907		Film Negative	https://digital.library.cornell.edu/catalog/ss:3322999
3323000	tve_exp1909_220	Nunatak Glacier	Alaska	Yakutat	Nunatak Glacier	3	July	1909	USGS Yakutat (D3)	-138.966	59.8104		Film Negative	https://digital.library.cornell.edu/catalog/ss:3323000
3323001	tve_exp1909_221	Nunatak Fiord	Alaska	Yakutat		3	July	1909	USGS Yakutat (D3)	-139.223	59.8459		Film Negative	https://digital.library.cornell.edu/catalog/ss:3323001
3323002	tve_exp1909_222	Nunatak	Alaska	Yakutat	Nunatak Glacier	3	July	1909	USGS Yakutat (D3)	-138.966	59.8104		Film Negative	https://digital.library.cornell.edu/catalog/ss:3323002
3323003	tve_exp1909_223	Nunatak	Alaska	Yakutat	Nunatak Glacier	3	July	1909	USGS Yakutat (D3)	-138.966	59.8104		Film Negative	https://digital.library.cornell.edu/catalog/ss:3323003
3323004	tve_exp1909_224	Nunatak	Alaska	Yakutat	Nunatak Glacier	3	July	1909	USGS Yakutat (D3)	-138.966	59.8104		Film Negative	https://digital.library.cornell.edu/catalog/ss:3323004
3323005	tve_exp1909_225	Nunatak	Alaska	Yakutat	Nunatak Glacier	5	July	1909	USGS Yakutat (D3)	-138.966	59.8104		Film Negative	https://digital.library.cornell.edu/catalog/ss:3323005
3323006	tve_exp1909_226	Nunatak	Alaska	Yakutat	Nunatak Glacier	5	July	1909	USGS Yakutat (D3)	-138.966	59.8104		Film Negative	https://digital.library.cornell.edu/catalog/ss:3323006
3323007	tve_exp1909_227	Nunatak	Alaska	Yakutat	Nunatak Glacier	5	July	1909	USGS Yakutat (D3)	-138.966	59.8104		Film Negative	https://digital.library.cornell.edu/catalog/ss:3323007
3323008	tve_exp1909_228	Nunatak	Alaska	Yakutat	Nunatak Glacier	5	July	1909	USGS Yakutat (D3)	-138.966	59.8104		Film Negative	https://digital.library.cornell.edu/catalog/ss:3323008
3323009	tve_exp1909_229	Nunatak	Alaska	Yakutat	Nunatak Glacier	5	July	1909	USGS Yakutat (D3)	-138.966	59.8104		Film Negative	https://digital.library.cornell.edu/catalog/ss:3323009
3323010	tve_exp1909_230	Nunatak	Alaska	Yakutat	Nunatak Glacier	5	July	1909	USGS Yakutat (D3)	-138.966	59.8104		Film Negative	https://digital.library.cornell.edu/catalog/ss:3323010
3323011	tve_exp1909_231	Nunatak	Alaska	Yakutat	Nunatak Glacier			1909	USGS Yakutat (D3)	-138.966	59.8104		Film Negative	https://digital.library.cornell.edu/catalog/ss:3323011
3323012	tve_exp1909_232	Nunatak	Alaska	Yakutat	Nunatak Glacier			1909	USGS Yakutat (D3)	-138.966	59.8104		Film Negative	https://digital.library.cornell.edu/catalog/ss:3323012
3323013	tve_exp1909_233	Nunatak	Alaska	Yakutat	Nunatak Glacier			1909	USGS Yakutat (D3)	-138.966	59.8104		Film Negative	https://digital.library.cornell.edu/catalog/ss:3323013
9285930	tve_exp1909_234_02	Nunatak	Alaska	Yakutat	Nunatak Glacier			1909	USGS Yakutat (D3)	-138.966	59.8104		Film Negative	https://digital.library.cornell.edu/catalog/ss:9285930
3323014	tve_exp1909_234	Nunatak	Alaska	Yakutat	Nunatak Glacier			1909	USGS Yakutat (D3)	-138.966	59.8104		Film Negative	https://digital.library.cornell.edu/catalog/ss:3323014
3323015	tve_exp1909_235	507 – 512’ Valdez [Glacier]	Alaska		Valdez Glacier	18	Aug	1909	USGS Valdez (A6)	-146.173	61.2051		Film Negative	https://digital.library.cornell.edu/catalog/ss:3323015
3323016	tve_exp1909_236	507 – 512’ Valdez [Glacier outwash plain]	Alaska			18	Aug	1909	USGS Valdez (A6)	-146.173	61.2051		Film Negative	https://digital.library.cornell.edu/catalog/ss:3323016
3323017	tve_exp1909_237	507 – 512’ Valdez [Glacier outwash plain]	Alaska			18	August	1909	USGS Valdez (A6)	-146.173	61.2051		Film Negative	https://digital.library.cornell.edu/catalog/ss:3323017
3323018	tve_exp1909_341	Salmon stream at Ellamar	Alaska	Prince William Sound			August	1909	USGS Cordova (D8)	-146.698	60.8959		Film Negative	https://digital.library.cornell.edu/catalog/ss:3323018
9285932	tve_exp1909_241a	Yakutat Harbor - Ocean Cape	Alaska	Yakutat			August	1909	USGS Yakutat (C5)	-139.737	59.5477		Film Negative	https://digital.library.cornell.edu/catalog/ss:9285932
9285934	tve_exp1909_241_02	Yakutat Harbor - Ocean Cape	Alaska	Yakutat			August	1909	USGS Yakutat (C5)	-139.737	59.5477		Film Negative	https://digital.library.cornell.edu/catalog/ss:9285934
9285933	tve_exp1909_241b	Yakutat Harbor - Ocean Cape	Alaska	Yakutat			August	1909	USGS Yakutat (C5)	-139.737	59.5477		Film Negative	https://digital.library.cornell.edu/catalog/ss:9285933
9285936	tve_exp1909_242_02	Yakutat Harbor - Ocean Cape	Alaska	Yakutat			August	1909	USGS Yakutat (C5)	-139.737	59.5477		Film Negative	https://digital.library.cornell.edu/catalog/ss:9285936
3323022	tve_exp1909_242	Yakutat Harbor - Ocean Cape	Alaska	Yakutat			August	1909	USGS Yakutat (C5)	-139.737	59.5477		Film Negative	https://digital.library.cornell.edu/catalog/ss:3323022
3323023	tve_exp1909_243	Yakutat Harbor - Ocean Cape	Alaska	Yakutat				1909	USGS Yakutat (C5)	-139.737	59.5477		Film Negative	https://digital.library.cornell.edu/catalog/ss:3323023
3323024	tve_exp1909_244	Yakutat Harbor - Ocean Cape	Alaska	Yakutat				1909	USGS Yakutat (C5)	-139.737	59.5477		Film Negative	https://digital.library.cornell.edu/catalog/ss:3323024
3323025	tve_exp1909_245	Yakutat Harbor - Ocean Cape	Alaska	Yakutat				1909	USGS Yakutat (C5)	-139.737	59.5477		Film Negative	https://digital.library.cornell.edu/catalog/ss:3323025
3323026	tve_exp1909_246	Yakutat Harbor - Ocean Cape	Alaska	Yakutat				1909	USGS Yakutat (C5)	-139.737	59.5477		Film Negative	https://digital.library.cornell.edu/catalog/ss:3323026
9285938	tve_exp1909_247a	No label						1909						https://digital.library.cornell.edu/catalog/ss:9285938
9285939	tve_exp1909_247b	No label						1909						https://digital.library.cornell.edu/catalog/ss:9285939
3323028	tve_exp1909_248	No label						1909					Film Negative	https://digital.library.cornell.edu/catalog/ss:3323028
3323029	tve_exp1909_249	No label						1909					Film Negative	https://digital.library.cornell.edu/catalog/ss:3323029
3323030	tve_exp1909_250	No label						1909					Film Negative	https://digital.library.cornell.edu/catalog/ss:3323030
3323031	tve_exp1909_251	No label						1909					Film Negative	https://digital.library.cornell.edu/catalog/ss:3323031
9285941	tve_exp1909_252a	Hubbard and Nunatak	Alaska	Yakutat	Hubbard Glacier			1909	USGS Mount St. Elias (A4,A5)	-139.466	60.0247		Film Negative	https://digital.library.cornell.edu/catalog/ss:9285941
9285942	tve_exp1909_252b	Hubbard and Nunatak	Alaska	Yakutat	Hubbard Glacier			1909	USGS Mount St. Elias (A4,A5)	-139.466	60.0247		Film Negative	https://digital.library.cornell.edu/catalog/ss:9285942
3323033	tve_exp1909_253	Hubbard and Nunatak	Alaska	Yakutat	Hubbard Glacier			1909	USGS Mount St. Elias (A4,A5)	-139.466	60.0247		Film Negative	https://digital.library.cornell.edu/catalog/ss:3323033
3323034	tve_exp1909_254	Hubbard and Nunatak	Alaska	Yakutat	Hubbard Glacier			1909	USGS Mount St. Elias (A4,A5)	-139.466	60.0247		Film Negative	https://digital.library.cornell.edu/catalog/ss:3323034
3323035	tve_exp1909_255	Hubbard and Nunatak	Alaska	Yakutat	Hubbard Glacier			1909	USGS Mount St. Elias (A4,A5)	-139.466	60.0247		Film Negative	https://digital.library.cornell.edu/catalog/ss:3323035
3323036	tve_exp1909_256	Hubbard and Nunatak	Alaska	Yakutat	Hubbard Glacier			1909	USGS Mount St. Elias (A4,A5)	-139.466	60.0247		Film Negative	https://digital.library.cornell.edu/catalog/ss:3323036
3323037	tve_exp1909_257	Hubbard and Nunatak	Alaska	Yakutat	Hubbard Glacier			1909	USGS Mount St. Elias (A4,A5)	-139.466	60.0247		Film Negative	https://digital.library.cornell.edu/catalog/ss:3323037
9285944	tve_exp1909_258a	Galiano Gl, xxxxx, At Camp, xxxx xxxx Yak Bay, last of July 1909 [partially illegible]					July	1909		-139.715	59.9722			https://digital.library.cornell.edu/catalog/ss:9285944
9285945	tve_exp1909_258b	Galiano Gl, xxxxx, At Camp, xxxx xxxx Yak Bay, last of July 1909 [partially illegible]					July	1909		-139.715	59.9722			https://digital.library.cornell.edu/catalog/ss:9285945
9285946	tve_exp1909_258c						July	1909						https://digital.library.cornell.edu/catalog/ss:9285946
3323039	tve_exp1909_259	No label						1909					Film Negative	https://digital.library.cornell.edu/catalog/ss:3323039
3323040	tve_exp1909_260	No label						1909					Film Negative	https://digital.library.cornell.edu/catalog/ss:3323040
3323041	tve_exp1909_261	No label						1909					Film Negative	https://digital.library.cornell.edu/catalog/ss:3323041
9285948	tve_exp1909_262a_2	No Label: forest killed by submergence Khantaak Is.	Alaska	Yakutat					USGS Yakutat (C5)					https://digital.library.cornell.edu/catalog/ss:9285948
9285949	tve_exp1909_262b	No Label: forest killed by submergence Khantaak Is.	Alaska	Yakutat					USGS Yakutat (C5)					https://digital.library.cornell.edu/catalog/ss:9285949
3323043	tve_exp1909_263	Forest killed by submergence Khantaak Is.	Alaska	Yakutat			August	1909	USGS Yakutat (C5)	-139.76	59.5988		Film Negative	https://digital.library.cornell.edu/catalog/ss:3323043
3323044	tve_exp1909_264	Forest killed by submergence Khantaak Is.	Alaska	Yakutat			August	1909	USGS Yakutat (C5)	-139.76	59.5988		Film Negative	https://digital.library.cornell.edu/catalog/ss:3323044
3323045	tve_exp1909_265	Forest killed by submergence Khantaak Is.	Alaska	Yakutat			August	1909	USGS Yakutat (C5)	-139.76	59.5988		Film Negative	https://digital.library.cornell.edu/catalog/ss:3323045
9285951	tve_exp1909_266_02	Forest killed by submergence Khantaak Is.	Alaska	Yakutat			August	1909	USGS Yakutat (C5)	-139.76	59.5988		Film Negative	https://digital.library.cornell.edu/catalog/ss:9285951
3323046	tve_exp1909_266	Forest killed by submergence Khantaak Is.	Alaska	Yakutat			August	1909	USGS Yakutat (C5)	-139.76	59.5988		Film Negative	https://digital.library.cornell.edu/catalog/ss:3323046
3323047	tve_exp1909_267	Yakutat Cemetary	Alaska	Yakutat				1909	USGS Yakutat (C5)	-139.733	59.5468		Film Negative	https://digital.library.cornell.edu/catalog/ss:3323047
3323048	tve_exp1909_268	Yakutat Cemetary	Alaska	Yakutat				1909	USGS Yakutat (C5)	-139.733	59.5468		Film Negative	https://digital.library.cornell.edu/catalog/ss:3323048
3323049	tve_exp1909_269	Yakutat Cemetary	Alaska	Yakutat				1909	USGS Yakutat (C5)	-139.733	59.5468		Film Negative	https://digital.library.cornell.edu/catalog/ss:3323049
3323050	tve_exp1909_270	Yakutat Cemetary	Alaska	Yakutat				1909	USGS Yakutat (C5)	-139.733	59.5468		Film Negative	https://digital.library.cornell.edu/catalog/ss:3323050
3323051	tve_exp1909_271	Hidden	Alaska	Yakutat	Hidden Glacier			1909	USGS Yakutat (D4)	-139.05	59.7003		Film Negative	https://digital.library.cornell.edu/catalog/ss:3323051
3323052	tve_exp1909_272	Hidden	Alaska	Yakutat	Hidden Glacier			1909	USGS Yakutat (D4)	-139.05	59.7003		Film Negative	https://digital.library.cornell.edu/catalog/ss:3323052
3323053	tve_exp1909_273	Hidden	Alaska	Yakutat	Hidden Glacier			1909	USGS Yakutat (D4)	-139.05	59.7003		Film Negative	https://digital.library.cornell.edu/catalog/ss:3323053
3323054	tve_exp1909_274	Hidden	Alaska	Yakutat	Hidden Glacier			1909	USGS Yakutat (D4)	-139.05	59.7003		Film Negative	https://digital.library.cornell.edu/catalog/ss:3323054
3323055	tve_exp1909_275	Hidden	Alaska	Yakutat	Hidden Glacier			1909	USGS Yakutat (D4)	-139.05	59.7003		Film Negative	https://digital.library.cornell.edu/catalog/ss:3323055
3323056	tve_exp1909_276	Hidden	Alaska	Yakutat	Hidden Glacier			1909	USGS Yakutat (D4)	-139.05	59.7003		Film Negative	https://digital.library.cornell.edu/catalog/ss:3323056
3323057	tve_exp1909_277	Hidden	Alaska	Yakutat	Hidden Glacier			1909	USGS Yakutat (D4)	-139.05	59.7003		Film Negative	https://digital.library.cornell.edu/catalog/ss:3323057
3323058	tve_exp1909_278	Hidden	Alaska	Yakutat	Hidden Glacier			1909	USGS Yakutat (D4)	-139.05	59.7003		Film Negative	https://digital.library.cornell.edu/catalog/ss:3323058
3323059	tve_exp1909_279	Hidden	Alaska	Yakutat	Hidden Glacier			1909	USGS Yakutat (D4)	-139.05	59.7003		Film Negative	https://digital.library.cornell.edu/catalog/ss:3323059
3323060	tve_exp1909_280	No label						1909					Film Negative	https://digital.library.cornell.edu/catalog/ss:3323060
3323061	tve_exp1909_281	No label						1909					Film Negative	https://digital.library.cornell.edu/catalog/ss:3323061
3323062	tve_exp1909_282	No label						1909					Film Negative	https://digital.library.cornell.edu/catalog/ss:3323062
3323063	tve_exp1909_283	No label						1909					Film Negative	https://digital.library.cornell.edu/catalog/ss:3323063
3323064	tve_exp1909_284	No label						1909					Film Negative	https://digital.library.cornell.edu/catalog/ss:3323064
3323065	tve_exp1909_285	No label						1909					Film Negative	https://digital.library.cornell.edu/catalog/ss:3323065
3323066	tve_exp1909_286	No label						1909					Film Negative	https://digital.library.cornell.edu/catalog/ss:3323066
3323067	tve_exp1909_287	No label						1909					Film Negative	https://digital.library.cornell.edu/catalog/ss:3323067
3323068	tve_exp1909_288	No label						1909					Film Negative	https://digital.library.cornell.edu/catalog/ss:3323068
3323069	tve_exp1909_289	No label						1909					Film Negative	https://digital.library.cornell.edu/catalog/ss:3323069
3323070	tve_exp1909_290	Fourth	Alaska	Yakutat	Fourth Glacier			1909	USGS Yakutat (C4)	-139.097	59.6474		Film Negative	https://digital.library.cornell.edu/catalog/ss:3323070
3323071	tve_exp1909_291	Fourth	Alaska	Yakutat	Fourth Glacier			1909	USGS Yakutat (C4)	-139.097	59.6474		Film Negative	https://digital.library.cornell.edu/catalog/ss:3323071
3323072	tve_exp1909_292	Fourth	Alaska	Yakutat	Fourth Glacier			1909	USGS Yakutat (C4)	-139.097	59.6474		Film Negative	https://digital.library.cornell.edu/catalog/ss:3323072
3323073	tve_exp1909_293	Fourth	Alaska	Yakutat	Fourth Glacier			1909	USGS Yakutat (C4)	-139.097	59.6474		Film Negative	https://digital.library.cornell.edu/catalog/ss:3323073
3323074	tve_exp1909_294	Fourth	Alaska	Yakutat	Fourth Glacier			1909	USGS Yakutat (C4)	-139.097	59.6474		Film Negative	https://digital.library.cornell.edu/catalog/ss:3323074
3323075	tve_exp1909_295	Fourth	Alaska	Yakutat	Fourth Glacier			1909	USGS Yakutat (C4)	-139.097	59.6474		Film Negative	https://digital.library.cornell.edu/catalog/ss:3323075
3323076	tve_exp1909_296	Nunatak	Alaska	Yakutat	Nunatak Glacier			1909	USGS Yakutat (D3)	-138.966	59.8104		Film Negative	https://digital.library.cornell.edu/catalog/ss:3323076
3323077	tve_exp1909_297	Nunatak	Alaska	Yakutat	Nunatak Glacier			1909	USGS Yakutat (D3)	-138.966	59.8104		Film Negative	https://digital.library.cornell.edu/catalog/ss:3323077
11721371	tve_exp1909_298_02	Nunatak	Alaska	Yakutat	Nunatak Glacier			1909	USGS Yakutat (D3)	-138.966	59.8104		Film Negative	https://digital.library.cornell.edu/catalog/ss:11721371
3323078	tve_exp1909_298	Nunatak	Alaska	Yakutat	Nunatak Glacier			1909	USGS Yakutat (D3)	-138.966	59.8104		Film Negative	https://digital.library.cornell.edu/catalog/ss:3323078
3323079	tve_exp1909_299	Nunatak	Alaska	Yakutat	Nunatak Glacier			1909	USGS Yakutat (D3)	-138.966	59.8104		Film Negative	https://digital.library.cornell.edu/catalog/ss:3323079
3323080	tve_exp1909_300	Nunatak	Alaska	Yakutat	Nunatak Glacier			1909	USGS Yakutat (D3)	-138.966	59.8104		Film Negative	https://digital.library.cornell.edu/catalog/ss:3323080
3323081	tve_exp1909_301	Nunatak	Alaska	Yakutat	Nunatak Glacier			1909	USGS Yakutat (D3)	-138.966	59.8104		Film Negative	https://digital.library.cornell.edu/catalog/ss:3323081
3323082	tve_exp1909_302	Nunatak	Alaska	Yakutat	Nunatak Glacier			1909	USGS Yakutat (D3)	-138.966	59.8104		Film Negative	https://digital.library.cornell.edu/catalog/ss:3323082
3323083	tve_exp1909_303	No label						1909					Film Negative	https://digital.library.cornell.edu/catalog/ss:3323083
3323084	tve_exp1909_304	No label						1909					Film Negative	https://digital.library.cornell.edu/catalog/ss:3323084
3323085	tve_exp1909_305	Lucia Glacier	Alaska	Yakutat	Lucia Glacier			1909	USGS Yakutat (D6)	-139.892	60.0059		Film Negative	https://digital.library.cornell.edu/catalog/ss:3323085
3323086	tve_exp1909_306	Lucia Glacier	Alaska	Yakutat	Lucia Glacier			1909	USGS Yakutat (D6)	-139.892	60.0059		Film Negative	https://digital.library.cornell.edu/catalog/ss:3323086
3323087	tve_exp1909_307	Lucia Glacier	Alaska	Yakutat	Lucia Glacier			1909	USGS Yakutat (D6)	-139.892	60.0059		Film Negative	https://digital.library.cornell.edu/catalog/ss:3323087
3323088	tve_exp1909_308	Lucia Glacier	Alaska	Yakutat	Lucia Glacier			1909	USGS Yakutat (D6)	-139.892	60.0059		Film Negative	https://digital.library.cornell.edu/catalog/ss:3323088
3323089	tve_exp1909_309	Lucia Glacier	Alaska	Yakutat	Lucia Glacier			1909	USGS Yakutat (D6)	-139.892	60.0059		Film Negative	https://digital.library.cornell.edu/catalog/ss:3323089
3323091	tve_exp1909_311	Turner	Alaska	Yakutat	Turner Glacier			1909	USGS Mount St. Elias (A5)	-139.626	60.0271		Film Negative	https://digital.library.cornell.edu/catalog/ss:3323091
3323092	tve_exp1909_312	Turner	Alaska	Yakutat	Turner Glacier			1909	USGS Mount St. Elias (A5)	-139.626	60.0271		Film Negative	https://digital.library.cornell.edu/catalog/ss:3323092
3323093	tve_exp1909_313	Turner	Alaska	Yakutat	Turner Glacier			1909	USGS Mount St. Elias (A5)	-139.626	60.0271		Film Negative	https://digital.library.cornell.edu/catalog/ss:3323093
3323094	tve_exp1909_314	Turner	Alaska	Yakutat	Turner Glacier			1909	USGS Mount St. Elias (A5)	-139.626	60.0271		Film Negative	https://digital.library.cornell.edu/catalog/ss:3323094
3323095	tve_exp1909_315	Turner	Alaska	Yakutat	Turner Glacier			1909	USGS Mount St. Elias (A5)	-139.626	60.0271		Film Negative	https://digital.library.cornell.edu/catalog/ss:3323095
3323096	tve_exp1909_316	Turner	Alaska	Yakutat	Turner Glacier			1909	USGS Mount St. Elias (A5)	-139.626	60.0271		Film Negative	https://digital.library.cornell.edu/catalog/ss:3323096
3323097	tve_exp1909_317	Turner	Alaska	Yakutat	Turner Glacier			1909	USGS Mount St. Elias (A5)	-139.626	60.0271		Film Negative	https://digital.library.cornell.edu/catalog/ss:3323097
3323098	tve_exp1909_318	Turner	Alaska	Yakutat	Turner Glacier			1909	USGS Mount St. Elias (A5)	-139.626	60.0271		Film Negative	https://digital.library.cornell.edu/catalog/ss:3323098
3323099	tve_exp1909_319	Turner	Alaska	Yakutat	Turner Glacier			1909	USGS Mount St. Elias (A5)	-139.626	60.0271		Film Negative	https://digital.library.cornell.edu/catalog/ss:3323099
3323100	tve_exp1909_320	Turner	Alaska	Yakutat	Turner Glacier			1909	USGS Mount St. Elias (A5)	-139.626	60.0271		Film Negative	https://digital.library.cornell.edu/catalog/ss:3323100
3323101	tve_exp1909_321	Khantaak Is.	Alaska	Yakutat				1909	USGS Yakutat (C5)	-139.76	59.5988		Film Negative	https://digital.library.cornell.edu/catalog/ss:3323101
3323102	tve_exp1909_322	Khantaak Is.	Alaska	Yakutat		2	August	1909	USGS Yakutat (C5)	-139.76	59.5988		Film Negative	https://digital.library.cornell.edu/catalog/ss:3323102
3323103	tve_exp1909_323	Khantaak Is.	Alaska	Yakutat		2	August	1909	USGS Yakutat (C5)	-139.76	59.5988		Film Negative	https://digital.library.cornell.edu/catalog/ss:3323103
3323104	tve_exp1909_324	Khantaak Is.	Alaska	Yakutat		2	August	1909	USGS Yakutat (C5)	-139.76	59.5988		Film Negative	https://digital.library.cornell.edu/catalog/ss:3323104
3323105	tve_exp1909_325	Khantaak Is.	Alaska	Yakutat		2	August	1909	USGS Yakutat (C5)	-139.76	59.5988		Film Negative	https://digital.library.cornell.edu/catalog/ss:3323105
3323106	tve_exp1909_326	No label				21	August	1909					Film Negative	https://digital.library.cornell.edu/catalog/ss:3323106
3323107	tve_exp1909_327	No label				21	August	1909					Film Negative	https://digital.library.cornell.edu/catalog/ss:3323107
3323108	tve_exp1909_328	No label				21	August	1909					Film Negative	https://digital.library.cornell.edu/catalog/ss:3323108
3323109	tve_exp1909_329	No label				21	August	1909					Film Negative	https://digital.library.cornell.edu/catalog/ss:3323109
3323110	tve_exp1909_330	Columbia	Alaska	Prince William Sound	Columbia Glacier	21	August	1909	USGS Seward (D1), Anchorage (A1)	-147.077	61.0958		Film Negative	https://digital.library.cornell.edu/catalog/ss:3323110
3323111	tve_exp1909_331	Columbia	Alaska	Prince William Sound	Columbia Glacier	21	August	1909	USGS Seward (D1), Anchorage (A1)	-147.077	61.0958		Film Negative	https://digital.library.cornell.edu/catalog/ss:3323111
3323112	tve_exp1909_332	Columbia	Alaska	Prince William Sound	Columbia Glacier				USGS Seward (D1), Anchorage (A1)	-147.077	61.0958		Film Negative	https://digital.library.cornell.edu/catalog/ss:3323112
3323113	tve_exp1909_333	Columbia	Alaska	Prince William Sound	Columbia Glacier				USGS Seward (D1), Anchorage (A1)	-147.077	61.0958		Film Negative	https://digital.library.cornell.edu/catalog/ss:3323113
3323114	tve_exp1909_334	Columbia	Alaska	Prince William Sound	Columbia Glacier				USGS Seward (D1), Anchorage (A1)	-147.077	61.0958		Film Negative	https://digital.library.cornell.edu/catalog/ss:3323114
3323115	tve_exp1909_335	Columbia	Alaska	Prince William Sound	Columbia Glacier				USGS Seward (D1), Anchorage (A1)	-147.077	61.0958		Film Negative	https://digital.library.cornell.edu/catalog/ss:3323115
3323116	tve_exp1909_336	Columbia Glacier WRB	Alaska	Prince William Sound	Columbia Glacier				USGS Seward (D1), Anchorage (A1)	-147.077	61.0958		Film Negative	https://digital.library.cornell.edu/catalog/ss:3323116
3323117	tve_exp1909_337	Columbia Glacier WRB	Alaska	Prince William Sound	Columbia Glacier				USGS Seward (D1), Anchorage (A1)	-147.077	61.0958		Film Negative	https://digital.library.cornell.edu/catalog/ss:3323117
3323118	tve_exp1909_338	Columbia Glacier WRB	Alaska	Prince William Sound	Columbia Glacier			1909	USGS Seward (D1), Anchorage (A1)	-147.077	61.0958		Film Negative	https://digital.library.cornell.edu/catalog/ss:3323118
3323119	tve_exp1909_339	Columbia Glacier WRB	Alaska	Prince William Sound	Columbia Glacier			1909	USGS Seward (D1), Anchorage (A1)	-147.077	61.0958		Film Negative	https://digital.library.cornell.edu/catalog/ss:3323119
3323120	tve_exp1909_340	Columbia Glacier WRB	Alaska	Prince William Sound	Columbia Glacier			1909	USGS Seward (D1), Anchorage (A1)	-147.077	61.0958		Film Negative	https://digital.library.cornell.edu/catalog/ss:3323120
3323121	tve_exp1909_341	Columbia Glacier WRB	Alaska	Prince William Sound	Columbia Glacier			1909	USGS Seward (D1), Anchorage (A1)	-147.077	61.0958		Film Negative	https://digital.library.cornell.edu/catalog/ss:3323121
3323122	tve_exp1909_342	Columbia	Alaska	Prince William Sound	Columbia Glacier			1909	USGS Seward (D1), Anchorage (A1)	-147.077	61.0958		Film Negative	https://digital.library.cornell.edu/catalog/ss:3323122
3323123	tve_exp1909_343	Columbia	Alaska	Prince William Sound	Columbia Glacier			1909	USGS Seward (D1), Anchorage (A1)	-147.077	61.0958		Film Negative	https://digital.library.cornell.edu/catalog/ss:3323123
3323124	tve_exp1909_344	Columbia	Alaska	Prince William Sound	Columbia Glacier				USGS Seward (D1), Anchorage (A1)	-147.077	61.0958		Film Negative	https://digital.library.cornell.edu/catalog/ss:3323124
3323125	tve_exp1909_345	Columbia	Alaska	Prince William Sound	Columbia Glacier				USGS Seward (D1), Anchorage (A1)	-147.077	61.0958		Film Negative	https://digital.library.cornell.edu/catalog/ss:3323125
3323126	tve_exp1909_346	Columbia	Alaska	Prince William Sound	Columbia Glacier				USGS Seward (D1), Anchorage (A1)	-147.077	61.0958		Film Negative	https://digital.library.cornell.edu/catalog/ss:3323126
3323127	tve_exp1909_347	Columbia	Alaska	Prince William Sound	Columbia Glacier				USGS Seward (D1), Anchorage (A1)	-147.077	61.0958		Film Negative	https://digital.library.cornell.edu/catalog/ss:3323127
3323128	tve_exp1909_348	Miles and Baird Glaciers	Alaska	Chugach Mountains	Miles Glacier				USGS Cordova (C2, D2)	-144.471	60.6582	Allen glacier is now the accepted name for Baird	Film Negative	https://digital.library.cornell.edu/catalog/ss:3323128
3323129	tve_exp1909_349	Miles and Baird Glaciers	Alaska	Chugach Mountains	Miles Glacier				USGS Cordova (C2, D2)	-144.471	60.6582	Allen glacier is now the accepted name for Baird	Film Negative	https://digital.library.cornell.edu/catalog/ss:3323129
3323130	tve_exp1909_350	Miles and Baird Glaciers	Alaska	Chugach Mountains	Miles Glacier				USGS Cordova (C2, D2)	-144.471	60.6582	Allen glacier is now the accepted name for Baird	Film Negative	https://digital.library.cornell.edu/catalog/ss:3323130
3323131	tve_exp1909_351	Miles and Baird Glaciers	Alaska	Chugach Mountains	Miles Glacier				USGS Cordova (C2, D2)	-144.471	60.6582	Allen glacier is now the accepted name for Baird	Film Negative	https://digital.library.cornell.edu/catalog/ss:3323131
3323132	tve_exp1909_352	Miles and Baird Glaciers	Alaska	Chugach Mountains	Miles Glacier				USGS Cordova (C2, D2)	-144.471	60.6582	Allen glacier is now the accepted name for Baird	Film Negative	https://digital.library.cornell.edu/catalog/ss:3323132
3323133	tve_exp1909_353	Miles and Baird Glaciers	Alaska	Chugach Mountains	Miles Glacier				USGS Cordova (C2, D2)	-144.471	60.6582	Allen glacier is now the accepted name for Baird	Film Negative	https://digital.library.cornell.edu/catalog/ss:3323133
3323134	tve_exp1909_354	Miles and Baird Glaciers	Alaska	Chugach Mountains	Miles Glacier	27	August	1909	USGS Cordova (C2, D2)	-144.471	60.6582	Allen glacier is now the accepted name for Baird	Film Negative	https://digital.library.cornell.edu/catalog/ss:3323134
3323135	tve_exp1909_355	Miles and Baird Glaciers	Alaska	Chugach Mountains	Miles Glacier	27	August	1909	USGS Cordova (C2, D2)	-144.471	60.6582		Film Negative	https://digital.library.cornell.edu/catalog/ss:3323135
3323136	tve_exp1909_356	Miles and Baird Glaciers	Alaska	Chugach Mountains	Miles Glacier	27	August	1909	USGS Cordova (C2, D2)	-144.471	60.6582	Allen glacier is now the accepted name for Baird	Film Negative	https://digital.library.cornell.edu/catalog/ss:3323136
3323137	tve_exp1909_357	Miles and Baird Glaciers	Alaska	Chugach Mountains	Miles Glacier	27	August	1909	USGS Cordova (C2, D2)	-144.471	60.6582	Allen glacier is now the accepted name for Baird	Film Negative	https://digital.library.cornell.edu/catalog/ss:3323137
3323138	tve_exp1909_358	Baird Glacier	Alaska	Chugach Mountains	Baird Glacier	27	August	1909	USGS Cordova (C2, D2)	-144.684	60.7879	Allen glacier is now the accepted name for Baird	Film Negative	https://digital.library.cornell.edu/catalog/ss:3323138
3323139	tve_exp1909_359	Baird Glacier Tarr	Alaska	Chugach Mountains	Baird Glacier	27	August	1909	USGS Cordova (C2, D2)	-144.684	60.7879	Allen glacier is now the accepted name for Baird	Film Negative	https://digital.library.cornell.edu/catalog/ss:3323139
3323140	tve_exp1909_360	Baird Glacier Tarr	Alaska	Chugach Mountains	Baird Glacier	27	August	1909	USGS Cordova (C2, D2)	-144.684	60.7879	Allen glacier is now the accepted name for Baird	Film Negative	https://digital.library.cornell.edu/catalog/ss:3323140
3323141	tve_exp1909_361	Baird Glacier Tarr	Alaska	Chugach Mountains	Baird Glacier				USGS Cordova (C2, D2)	-144.684	60.7879	Allen glacier is now the accepted name for Baird	Film Negative	https://digital.library.cornell.edu/catalog/ss:3323141
3323142	tve_exp1909_362	Baird Glacier Tarr	Alaska	Chugach Mountains	Baird Glacier				USGS Cordova (C2, D2)	-144.684	60.7879	Allen glacier is now the accepted name for Baird	Film Negative	https://digital.library.cornell.edu/catalog/ss:3323142
3323143	tve_exp1909_363	Baird Glacier Tarr	Alaska	Chugach Mountains	Baird Glacier				USGS Cordova (C2, D2)	-144.684	60.7879	Allen glacier is now the accepted name for Baird	Film Negative	https://digital.library.cornell.edu/catalog/ss:3323143
3323144	tve_exp1909_364	Baird Glacier Tarr	Alaska	Chugach Mountains	Baird Glacier				USGS Cordova (C2, D2)	-144.684	60.7879	Allen glacier is now the accepted name for Baird	Film Negative	https://digital.library.cornell.edu/catalog/ss:3323144
3323145	tve_exp1909_365	Valdez	Alaska	Prince William Sound					USGS Valdez (A7)	-146.246	61.1336		Film Negative	https://digital.library.cornell.edu/catalog/ss:3323145
3323146	tve_exp1909_366	Valdez	Alaska	Prince William Sound					USGS Valdez (A7)	-146.246	61.1336		Film Negative	https://digital.library.cornell.edu/catalog/ss:3323146
3323147	tve_exp1909_367	Valdez	Alaska	Prince William Sound				1909	USGS Valdez (A7)	-146.246	61.1336		Film Negative	https://digital.library.cornell.edu/catalog/ss:3323147
11721384	tve_exp1909_368_02	Valdez	Alaska	Prince William Sound				1909	USGS Valdez (A7)	-146.246	61.1336		Film Negative	https://digital.library.cornell.edu/catalog/ss:11721384
3323148	tve_exp1909_368	Valdez	Alaska	Prince William Sound				1909	USGS Valdez (A7)	-146.246	61.1336		Film Negative	https://digital.library.cornell.edu/catalog/ss:3323148
3323149	tve_exp1909_369	Valdez	Alaska	Prince William Sound				1909	USGS Valdez (A7)	-146.246	61.1336		Film Negative	https://digital.library.cornell.edu/catalog/ss:3323149
3323150	tve_exp1909_370	Valdez	Alaska	Prince William Sound				1909	USGS Valdez (A7)	-146.246	61.1336		Film Negative	https://digital.library.cornell.edu/catalog/ss:3323150
3323151	tve_exp1909_371	Nunatak Glacier	Alaska	Yakutat	Nunatak Glacier			1909	USGS Yakutat (D3)	-138.966	59.8104		Film Negative	https://digital.library.cornell.edu/catalog/ss:3323151
3323152	tve_exp1909_372	Nunatak Glacier	Alaska	Yakutat	Nunatak Glacier			1909	USGS Yakutat (D3)	-138.966	59.8104		Film Negative	https://digital.library.cornell.edu/catalog/ss:3323152
3323153	tve_exp1909_373	Nunatak Glacier	Alaska	Yakutat	Nunatak Glacier	1	July	1909	USGS Yakutat (D3)	-138.966	59.8104		Film Negative	https://digital.library.cornell.edu/catalog/ss:3323153
3323154	tve_exp1909_374	Nunatak Glacier	Alaska	Yakutat	Nunatak Glacier	27	August	1909	USGS Yakutat (D3)	-138.966	59.8104		Film Negative	https://digital.library.cornell.edu/catalog/ss:3323154
3323155	tve_exp1909_375	Nunatak Glacier	Alaska	Yakutat	Nunatak Glacier	27	August	1909	USGS Yakutat (D3)	-138.966	59.8104		Film Negative	https://digital.library.cornell.edu/catalog/ss:3323155
3323156	tve_exp1909_376	Portland (ship) at Ketchikan by Oscar von Engeln	Alaska	Southern Panhandle		27	August	1909	USGS Ketchikan (B5)				Film Negative	https://digital.library.cornell.edu/catalog/ss:3323156
3323157	tve_exp1909_377	by OVE [Oscar von Engeln] Disenchantment Bay or Actually Copper River	Alaska	Yakutat	Hubbard Glacier, Tuner Glacier			1909	USGS Mount St. Elias (A4,A5)	-139.626	60.0271		Film Negative	https://digital.library.cornell.edu/catalog/ss:3323157
3323158	tve_exp1909_378	Copper River rapids and ice bulbs from track [Copper River Railroad]	Alaska	Chugach Mountains				1909	USGS Cordova				Film Negative	https://digital.library.cornell.edu/catalog/ss:3323158
3323159	tve_exp1909_379	Copper River and glacier from track	Alaska	Chugach Mountains		27	August	1909	USGS Cordova				Film Negative	https://digital.library.cornell.edu/catalog/ss:3323159
3323160	tve_exp1909_380	Copper River rapids and alder covered piedmont bulb	Alaska	Chugach Mountains		20	June	1909	USGS Cordova				Film Negative	https://digital.library.cornell.edu/catalog/ss:3323160
3323161	tve_exp1909_381	Sunset at sea on way home - Aug. 27	Alaska			27	August	1909				Possibly later then Aug. 27th.	Film Negative	https://digital.library.cornell.edu/catalog/ss:3323161
3323162	tve_exp1909_382	Inside Passage	Alaska	Southern Panhandle		27	August	1909				Possibly later then Aug. 27th.	Film Negative	https://digital.library.cornell.edu/catalog/ss:3323162
3323163	tve_exp1909_383	Copper River, looking down stream	Alaska	Chugach Mountains		29	June	1909	USGS Cordova				Film Negative	https://digital.library.cornell.edu/catalog/ss:3323163
3322621	tve_exp1909_384	Mt. Fairweather	Alaska	Glacier Bay		2	July	1909	USGS Mount Fairweather (D5)	-137.543	58.907	C	Glass	https://digital.library.cornell.edu/catalog/ss:3322621
3322624	tve_exp1909_387	Fairweather Range	Alaska	Glacier Bay		3	July	1909	USGS Mount Fairweather (C4,C5,D4,D5)	-137.543	58.907	B	Glass	https://digital.library.cornell.edu/catalog/ss:3322624
3322625	tve_exp1909_388	Hubbard from Marble Point	Alaska	Yakutat	Hubbard Glacier	3	July	1909	USGS Yakutat (D4)	-139.466	60.0247	C	Glass	https://digital.library.cornell.edu/catalog/ss:3322625
3322627	tve_exp1909_390	Nunatak Glacier from Gilbert Site	Alaska	Yakutat	Nunatak Glacier			1909	USGS Yakutat (D3)	-138.966	59.8104	B+	Glass	https://digital.library.cornell.edu/catalog/ss:3322627
3322628	tve_exp1909_391	Nunatak Glacier from Butler site, East end	Alaska	Yakutat	Nunatak Glacier	3	July	1909	USGS Yakutat (D3)			B	Glass	https://digital.library.cornell.edu/catalog/ss:3322628
3322629	tve_exp1909_392	Nunatak Glacier from Butler site, West end	Alaska	Yakutat	Nunatak Glacier	3	July	1909	USGS Yakutat (D3)				Glass	https://digital.library.cornell.edu/catalog/ss:3322629
3322630	tve_exp1909_393	Young Grelly - North Side of Nuntak Fiord	Alaska	Yakutat				1909	USGS Yakutat (D3)			C+	Glass	https://digital.library.cornell.edu/catalog/ss:3322630
3322631	tve_exp1909_394	No label	Alaska			5	July	1909					Glass	https://digital.library.cornell.edu/catalog/ss:3322631
3322632	tve_exp1909_395	as #11 - n.g. duplicate	Alaska	Yakutat		5	July	1909				D	Glass	https://digital.library.cornell.edu/catalog/ss:3322632
3322633	tve_exp1909_396	Nunatak from new site with cairn	Alaska	Yakutat		3	July	1909	USGS Yakutat (D3)	-138.966	59.8104	C	Glass	https://digital.library.cornell.edu/catalog/ss:3322633
3322634	tve_exp1909_397	n/a	Alaska	n/a		3	July	1909				C+	Glass	https://digital.library.cornell.edu/catalog/ss:3322634
3322635	tve_exp1909_398	Cascading Glacier from cairn (1905 site)	Alaska	Yakutat	Cascading Glacier	3	July	1909	USGS Yakutat (D3)	-139.061	59.7988	B	Glass	https://digital.library.cornell.edu/catalog/ss:3322635
3322636	tve_exp1909_399	Rt. arm of Nunatak Cairn Site (1905 site)	Alaska	Yakutat				1909	USGS Yakutat (D3)	-138.966	59.8104	B+	Glass	https://digital.library.cornell.edu/catalog/ss:3322636
3322637	tve_exp1909_400	Rt. arm of Nunatak Gilbert Site	Alaska	Yakutat		3	July	1909	USGS Yakutat (D3)	-138.966	59.8104	C	Glass	https://digital.library.cornell.edu/catalog/ss:3322637
3322639	tve_exp1909_402	Cascading Glacier from NW, long focus	Alaska	Yakutat	Cascading Glacier	6	July	1909	USGS Yakutat (D3)	-139.061	59.7988	C	Glass	https://digital.library.cornell.edu/catalog/ss:3322639
3322642	tve_exp1909_405	Cascading Glacier from near top Gannet	Alaska	Yakutat	Cascading Glacier	6	July	1909	USGS Yakutat (D3)	-139.061	59.7988	B+	Glass	https://digital.library.cornell.edu/catalog/ss:3322642
3958872	tve_exp1909_408_02	Faults - General view - Gannet Nunatak	Alaska	Yakutat		7	July	1909	USGS Yakutat (D3)	-139.033	59.8261	C	Glass	https://digital.library.cornell.edu/catalog/ss:3958872
3322645	tve_exp1909_408	Faults - General view - Gannet Nunatak	Alaska	Yakutat		7	July	1909	USGS Yakutat (D3)	-139.033	59.8261	C	Glass	https://digital.library.cornell.edu/catalog/ss:3322645
3322646	tve_exp1909_409	Looking down on Nun. Glacier from summit of Nunatak (Panorama with #27)	Alaska	Yakutat		7	July	1909	USGS Yakutat (D3)	-138.966	59.8104	C	Glass	https://digital.library.cornell.edu/catalog/ss:3322646
3322650	tve_exp1909_413	Hubbard Glacier - Gilbert 1000 Foot site, panorama with 30a-31-32	Alaska	Yakutat	Hubbard Glacier			1909	USGS Mount St. Elias (A4,A5)	-139.466	60.0247	C	Glass	https://digital.library.cornell.edu/catalog/ss:3322650
3322651	tve_exp1909_414	Hubbard Glacier - Gilbert 1000 Foot site, panorama with 30-31-32	Alaska	Yakutat	Hubbard Glacier			1909	USGS Mount St. Elias (A4,A5)	-139.466	60.0247	B	Glass	https://digital.library.cornell.edu/catalog/ss:3322651
3322652	tve_exp1909_415	Hubbard Glacier - Gilbert 1000 Foot site, Panorama with 30-30a-32	Alaska	Yakutat	Hubbard Glacier	7	July	1909	USGS Mount St. Elias (A4,A5)	-139.466	60.0247	B	Glass	https://digital.library.cornell.edu/catalog/ss:3322652
3322653	tve_exp1909_416	Hubbard Glacier - Gilbert 1000 Foot site, Panorama with 30-30a-31	Alaska	Yakutat	Hubbard Glacier	7	July	1909	USGS Mount St. Elias (A4,A5)	-139.466	60.0247	B	Glass	https://digital.library.cornell.edu/catalog/ss:3322653
3322654	tve_exp1909_417	Variegated Glacier from 1000 Foot Gilbert Site - panorama with #34	Alaska	Yakutat	Variegated Glacier	7	July	1909	USGS Yakutat (D4)	-139.287	59.9999	D	Glass	https://digital.library.cornell.edu/catalog/ss:3322654
3322655	tve_exp1909_418	Variegated Glacier from 1000 Foot Gilbert Site - panorama with #33	Alaska	Yakutat	Variegated Glacier	7	July	1909	USGS Yakutat (D4)	-139.287	59.9999	D	Glass	https://digital.library.cornell.edu/catalog/ss:3322655
3958873	tve_exp1909_419_02	Hubbard Glacier from North shore - On mound with cairn	Alaska	Yakutat	Hubbard Glacier	7	July	1909	USGS Mount St. Elias (A4,A5)	-139.466	60.0247		Glass	https://digital.library.cornell.edu/catalog/ss:3958873
3322656	tve_exp1909_419	Hubbard Glacier from North shore - On mound with cairn	Alaska	Yakutat	Hubbard Glacier	7	July	1909	USGS Mount St. Elias (A4,A5)	-139.466	60.0247		Glass	https://digital.library.cornell.edu/catalog/ss:3322656
3958874	tve_exp1909_420_02	Hubbard Glacier - near North shore	Alaska	Yakutat	Hubbard Glacier	7	July	1909	USGS Mount St. Elias (A4,A5)	-139.466	60.0247	C	Glass	https://digital.library.cornell.edu/catalog/ss:3958874
3322657	tve_exp1909_420	Hubbard Glacier - near North shore	Alaska	Yakutat	Hubbard Glacier	7	July	1909	USGS Mount St. Elias (A4,A5)	-139.466	60.0247	C	Glass	https://digital.library.cornell.edu/catalog/ss:3322657
3322659	tve_exp1909_422	Hubbard Glacier cracked front - North shore - Cairn on mound	Alaska	Yakutat	Hubbard Glacier	9	July	1909	USGS Mount St. Elias (A4,A5)	-139.466	60.0247	C	Glass	https://digital.library.cornell.edu/catalog/ss:3322659
3322660	tve_exp1909_423	Hubbard Glacier 1905 site	Alaska	Yakutat	Hubbard Glacier	9	July	1909	USGS Mount St. Elias (A4,A5)	-139.466	60.0247	B+	Glass	https://digital.library.cornell.edu/catalog/ss:3322660
3322661	tve_exp1909_424	Hubbard Glacier - North shore	Alaska	Yakutat	Hubbard Glacier	9	July	1909	USGS Mount St. Elias (A4,A5)	-139.466	60.0247	B	Glass	https://digital.library.cornell.edu/catalog/ss:3322661
3322662	tve_exp1909_425	Turner Glacier - Panorama with #41 Haenke from Osier Island	Alaska	Yakutat	Turner Glacier	10	July	1909	USGS Mount St. Elias (A5)	-139.626	60.0271	C	Glass	https://digital.library.cornell.edu/catalog/ss:3322662
3322664	tve_exp1909_427	Contact "Hornblend and Red H moraine Variegated Glacier- "Interior Flat"	Alaska	Yakutat	Variegated Glacier	10	July	1909	USGS Yakutat (D4)	-139.287	59.9999	B	Glass	https://digital.library.cornell.edu/catalog/ss:3322664
3322665	tve_exp1909_428	Interior Flat Variegated Glacier - 1906 site	Alaska	Yakutat	Variegated Glacier	10	July	1909	USGS Yakutat (D4)	-139.287	59.9999	C	Glass	https://digital.library.cornell.edu/catalog/ss:3322665
3958875	tve_exp1909_428b	No label												https://digital.library.cornell.edu/catalog/ss:3958875
3322666	tve_exp1909_429	Crevassis of Hidden Glacier - from North side	Alaska	Yakutat	Hidden Glacier	10	July	1909	USGS Yakutat (D4)	-139.05	59.7003	B	Glass	https://digital.library.cornell.edu/catalog/ss:3322666
3958876	tve_exp1909_430b	No label												https://digital.library.cornell.edu/catalog/ss:3958876
3958877	tve_exp1909_431a	Four Ex. Panorama of Hidden Glacier - near site below 1905 site (Panorama #51, 52, 53, 54)	Alaska	Yakutat	Hidden Glacier	10	July	1909	USGS Yakutat (D4)	-139.05	59.7003	A+	Glass	https://digital.library.cornell.edu/catalog/ss:3958877
3958878	tve_exp1909_431d	Four Ex. Panorama of Hidden Glacier - near site below 1905 site (Panorama #51, 52, 53, 54)	Alaska	Yakutat	Hidden Glacier	10	July	1909	USGS Yakutat (D4)	-139.05	59.7003	A+	Glass	https://digital.library.cornell.edu/catalog/ss:3958878
3322669	tve_exp1909_432	Hidden Glacier (Panorama with #56, 57)	Alaska	Yakutat	Hidden Glacier	10	July	1909	USGS Yakutat (D4)	-139.05	59.7003	B+	Glass	https://digital.library.cornell.edu/catalog/ss:3322669
3322670	tve_exp1909_433	Hidden Glacier (Panorama with #55, 57)	Alaska	Yakutat	Hidden Glacier	10	July	1909	USGS Yakutat (D4)	-139.05	59.7003	A+	Glass	https://digital.library.cornell.edu/catalog/ss:3322670
3322671	tve_exp1909_434	Hidden Glacier, Panorama with #55, 56	Alaska	Yakutat	Hidden Glacier	11	July	1909	USGS Yakutat (D4)	-139.05	59.7003	A+	Glass	https://digital.library.cornell.edu/catalog/ss:3322671
3322672	tve_exp1909_435	Hidden Glacier from OVE [Oscar von Engeln] 1906 site	Alaska	Yakutat	Hidden Glacier	11	July	1909	USGS Yakutat (D4)	-139.05	59.7003		Glass	https://digital.library.cornell.edu/catalog/ss:3322672
3322673	tve_exp1909_436	Left headside of Hidden Glacier - 1906 site (Panorama with #55, 56, 57)	Alaska	Yakutat	Hidden Glacier	11	July	1909	USGS Yakutat (D4)	-139.05	59.7003	B	Glass	https://digital.library.cornell.edu/catalog/ss:3322673
3322674	tve_exp1909_437	Hidden Glacier long focus Tarr 1905 site	Alaska	Yakutat	Hidden Glacier	11	July	1909	USGS Yakutat (D4)	-139.05	59.7003	B	Glass	https://digital.library.cornell.edu/catalog/ss:3322674
3322675	tve_exp1909_438	Interior Flat - from moraine	Alaska	Yakutat		11	July	1909	USGS Yakutat (D4)	-139.287	59.9999	B	Glass	https://digital.library.cornell.edu/catalog/ss:3322675
3322676	tve_exp1909_439	Interior Flat - Variegated Glacier	Alaska	Yakutat	Variegated Glacier	11	July	1909	USGS Yakutat (D4)	-139.287	59.9999	A+	Glass	https://digital.library.cornell.edu/catalog/ss:3322676
3322677	tve_exp1909_440	Variegated Glacier - ablation moraine	Alaska	Yakutat	Variegated Glacier	11	July	1909	USGS Yakutat (D4)	-139.287	59.9999	A+	Glass	https://digital.library.cornell.edu/catalog/ss:3322677
4057648	tve_exp1909_442_02	N - Margin Variegated Below 1100 Foot Site	Alaska	Yakutat	Variegated Glacier	11	July	1909	USGS Yakutat (D4)	-139.287	59.9999	C	Glass	https://digital.library.cornell.edu/catalog/ss:4057648
3322679	tve_exp1909_442	N - margin Variegated below 1100 Foot site	Alaska	Yakutat	Variegated Glacier	11	July	1909	USGS Yakutat (D4)	-139.287	59.9999	C	Glass	https://digital.library.cornell.edu/catalog/ss:3322679
3322680	tve_exp1909_443	Crevassed Variegated Glacier from out on ice near 1905 site	Alaska	Yakutat	Variegated Glacier	11	July	1909	USGS Yakutat (D4)	-139.287	59.9999	C	Glass	https://digital.library.cornell.edu/catalog/ss:3322680
3322681	tve_exp1909_444	Panorama from 1100 Foot site	Alaska	Yakutat	Variegated Glacier			1909	USGS Yakutat (D4)	-139.287	59.9999	C	Glass	https://digital.library.cornell.edu/catalog/ss:3322681
3322682	tve_exp1909_445	Panorama from 1100 Foot site	Alaska	Yakutat	Variegated Glacier	11	July	1909	USGS Yakutat (D4)	-139.287	59.9999	B	Glass	https://digital.library.cornell.edu/catalog/ss:3322682
3322683	tve_exp1909_446	Panorama from 1100 Foot site	Alaska	Yakutat	Variegated Glacier	11	July	1909	USGS Yakutat (D4)	-139.287	59.9999	A	Glass	https://digital.library.cornell.edu/catalog/ss:3322683
3322684	tve_exp1909_447	66-67 panorama - from Variegated moraine long focus - new 1100 Foot site, see 65	Alaska	Yakutat		11	July	1909	USGS Yakutat (D4)	-139.287	59.9999	B	Glass	https://digital.library.cornell.edu/catalog/ss:3322684
3322685	tve_exp1909_448	as 65	Alaska	Yakutat		11	July	1909	USGS Yakutat (D4)	-139.287	59.9999	B+	Glass	https://digital.library.cornell.edu/catalog/ss:3322685
3322686	tve_exp1909_449	Out on ice of Variegated Glacier, hills across Russell Fiord	Alaska	Yakutat	Variegated Glacier	14	July	1909	USGS Yakutat (D4)	-139.287	59.9999	A	Glass	https://digital.library.cornell.edu/catalog/ss:3322686
3322687	tve_exp1909_450	Variegated Glacier - moraine center looking South	Alaska	Yakutat	Variegated Glacier	14	July	1909	USGS Yakutat (D4)	-139.287	59.9999	B	Glass	https://digital.library.cornell.edu/catalog/ss:3322687
3322688	tve_exp1909_451	Glacial Groovings in marble of Marble Point	Alaska	Yakutat		14	July	1909	USGS Yakutat (D4)	-139.399	59.9376	B	Glass	https://digital.library.cornell.edu/catalog/ss:3322688
3322689	tve_exp1909_452	Glacial Groovings in marble of Marble Point: showing bat	Alaska	Yakutat		14	July	1909	USGS Yakutat (D4)	-139.399	59.9376		Glass	https://digital.library.cornell.edu/catalog/ss:3322689
3322690	tve_exp1909_453	Panorama with 75 and 76 - Hubbard and Turner front from Variegated moraine shown marginal channel, Less than 1906 800	Alaska	Yakutat	Turner Glacier, Hubbard Glacier	14	July	1909	USGS Mount St. Elias (A4,A5)	-139.466	60.0247	B	Glass	https://digital.library.cornell.edu/catalog/ss:3322690
3322691	tve_exp1909_454	Panorama with 74-76	Alaska	Yakutat	Turner Glacier, Hubbard Glacier	14	July	1909	USGS Mount St. Elias (A4,A5)	-139.287	59.9999	B	Glass	https://digital.library.cornell.edu/catalog/ss:3322691
3322692	tve_exp1909_455	Panorama with 74-75	Alaska	Yakutat	Turner Glacier, Hubbard Glacier			1909	USGS Mount St. Elias (A4,A5)	-139.287	59.9999	A+	Glass	https://digital.library.cornell.edu/catalog/ss:3322692
3322693	tve_exp1909_456	Panorama with 78-79|1906 site	Alaska	Yakutat	Turner Glacier, Hubbard Glacier	14	July	1909	USGS Mount St. Elias (A4,A5)	-139.287	59.9999	A+	Glass	https://digital.library.cornell.edu/catalog/ss:3322693
3322694	tve_exp1909_457	Panorama with 77-79. Marginal Gorge of Variegated Glacier	Alaska	Yakutat	Variegated Glacier	14	July	1909	USGS Yakutat (D4)	-139.287	59.9999	B+	Glass	https://digital.library.cornell.edu/catalog/ss:3322694
3322695	tve_exp1909_458	Panorama with 77-78. Two shallow marginal channels toward S. of Gorge Variegated Glacier	Alaska	Yakutat	Variegated Glacier	15	July	1909	USGS Yakutat (D4)	-139.287	59.9999	A	Glass	https://digital.library.cornell.edu/catalog/ss:3322695
3322696	tve_exp1909_459	No label	Alaska					1909		-139.287	59.9999	A+	Glass	https://digital.library.cornell.edu/catalog/ss:3322696
3322697	tve_exp1909_460	Looking out to sea from hill to east of Interior Flat of Variegated	Alaska	Yakutat	Variegated Glacier	15	July	1909	USGS Yakutat (D4)	-139.287	59.9999	A	Glass	https://digital.library.cornell.edu/catalog/ss:3322697
3322698	tve_exp1909_461	Mt. Alexander from N. shore	Alaska	Yakutat		17	July	1909	USGS Yakutat (D4)	-139.45	59.9107	A+	Glass	https://digital.library.cornell.edu/catalog/ss:3322698
3322699	tve_exp1909_462	Hidden Glacier Looking out from center front	Alaska	Yakutat	Hidden Glacier	17	July	1909	USGS Yakutat (D4)	-139.05	59.7003	A+	Glass	https://digital.library.cornell.edu/catalog/ss:3322699
3322700	tve_exp1909_463	No label	Alaska			17	July	1909				A+		https://digital.library.cornell.edu/catalog/ss:3322700
3322702	tve_exp1909_465	Fourth or Beasley Glacier In front, shows entire Glacier	Alaska	Yakutat	Fourth Glacier	21	July	1909	USGS Yakutat (C4)	-139.097	59.6474	B	Glass	https://digital.library.cornell.edu/catalog/ss:3322702
3322703	tve_exp1909_466	Left hand side of Beasley Glacier from talus on left	Alaska	Yakutat	Fourth Glacier	21	July	1909	USGS Yakutat (C4)	-139.097	59.6474	A+	Glass	https://digital.library.cornell.edu/catalog/ss:3322703
3322704	tve_exp1909_467	Right side of Beasley or 4th Glacier From Talus on left	Alaska	Yakutat	Fourth Glacier	21	July	1909	USGS Yakutat (C4)	-139.097	59.6474	A+	Glass	https://digital.library.cornell.edu/catalog/ss:3322704
3322705	tve_exp1909_468	Galiano Glacier from ?	Alaska	Yakutat	Galiano Glacier	21	July	1909	USGS Yaktuat (D5)	-139.715	59.9722	A+, North America 2313, Fig. 16	Glass	https://digital.library.cornell.edu/catalog/ss:3322705
3322706	tve_exp1909_469	Pit of slumping on Galiano Glacier	Alaska	Yakutat	Galiano Glacier	21	July	1909	USGS Yaktuat (D5)	-139.715	59.9722	A+	Glass	https://digital.library.cornell.edu/catalog/ss:3322706
3322707	tve_exp1909_470	Moraine avalanche W Margin of Galiano Gl	Alaska	Yakutat	Galiano Glacier	21	July	1909	USGS Yaktuat (D5)	-139.715	59.9722	A+, Fig. 20		https://digital.library.cornell.edu/catalog/ss:3322707
3322710	tve_exp1909_473	Panorama from Amphitheatre Butte shows fan and islands	Alaska	Yakutat		21	July	1909	USGS Yaktuat (D5)	-139.784	59.9463	B+	Print and Glass	https://digital.library.cornell.edu/catalog/ss:3322710
12559253	tve_exp1909_473b	Panorama from Amphitheatre Butte shows fan and islands	Alaska	Yakutat		21	July	1909	USGS Yaktuat (D5)	-139.784	59.9463	B+	Print and Glass	https://digital.library.cornell.edu/catalog/ss:12559253
3322711	tve_exp1909_474	Panorama from Amphitheatre Butte	Alaska	Yakutat		21	July	1909	USGS Yaktuat (D5)	-139.784	59.9463	B	Print and Glass	https://digital.library.cornell.edu/catalog/ss:3322711
3322712	tve_exp1909_475	Panorama with 94-95-96-97a	Alaska	Yakutat		21	July	1909	USGS Yaktuat (D5)	-139.784	59.9463	C	Print and Glass	https://digital.library.cornell.edu/catalog/ss:3322712
3322714	tve_exp1909_477	Lucia Nunatak - from Amphitheatre Butte	Alaska	Yakutat	Lucia Glacier	21	July	1909	USGS Yaktuat (D5)	-139.892	60.0059	C	Glass	https://digital.library.cornell.edu/catalog/ss:3322714
3322716	tve_exp1909_479	Atrevida Glacier from crest of Amphitheatre Butte 2nd/expos	Alaska	Yakutat	Atrevida Glacier	31	July	1909	USGS Yaktuat (D5)	-139.787	59.9709	C	Glass	https://digital.library.cornell.edu/catalog/ss:3322716
3322717	tve_exp1909_480	Lucia from crest of Amphitheatre Butte|#1 of Panorama with 94 - 97	Alaska	Yakutat	Lucia Glacier	2	August	1909	USGS Yaktuat (D5)	-139.892	60.0059	A		https://digital.library.cornell.edu/catalog/ss:3322717
3322718	tve_exp1909_481	Marginal Moraine Ridge on Amphitheatre Butte	Alaska	Yakutat		2	August	1909	USGS Yaktuat (D5)	-139.784	59.9463	C	Glass	https://digital.library.cornell.edu/catalog/ss:3322718
3322719	tve_exp1909_482	Stream entering ice cave Galiano Glacier	Alaska	Yakutat	Galiano Glacier				USGS Yaktuat (D5)	-139.715	59.9722	grade n/a, Fig. 18	Glass	https://digital.library.cornell.edu/catalog/ss:3322719
3322720	tve_exp1909_483	Marginal strem Galiano Glacier on Amphitheatre Butte from place where it disappears in cave to source at "fountains"	Alaska	Yakutat	Galiano Glacier	7	August	1909	USGS Yaktuat (D5)	-139.715	59.9722	A+, Fig. 19		https://digital.library.cornell.edu/catalog/ss:3322720
3322721	tve_exp1909_484	Beateu[?] Silver Iceberg, Yakutat Bay	Alaska	Yakutat		7	August	1909	USGS Yaktuat (D5)	-139.938	59.7818	A+	Glass	https://digital.library.cornell.edu/catalog/ss:3322721
3322722	tve_exp1909_485	Beateu [?] Silver Iceberg detail W. Shore Yakutat Bay	Alaska	Yakutat		2	August	1909	USGS Yaktuat (D5)	-139.938	59.7818	Print only smooth jafer	Glass	https://digital.library.cornell.edu/catalog/ss:3322722
3322723	tve_exp1909_486	Surf among bergs, West shore, Yakutat Bay	Alaska	Yakutat		3	August	1909	USGS Yaktuat (D5)	-139.938	59.7818		Glass	https://digital.library.cornell.edu/catalog/ss:3322723
3322724	tve_exp1909_487	Panorama from Amphitheatre Butte second attempt	Alaska	Yakutat		3	August	1909	USGS Yaktuat (D5)	-139.784	59.9463	B	Print and Glass	https://digital.library.cornell.edu/catalog/ss:3322724
3322725	tve_exp1909_488	Panorama from Amphitheatre Butte	Alaska	Yakutat		3	August	1909	USGS Yaktuat (D5)	-139.784	59.9463	B+	Print and Glass	https://digital.library.cornell.edu/catalog/ss:3322725
3322726	tve_exp1909_489	Lucia etc from Terrace Point	Alaska	Yakutat		3	August	1909	USGS Yaktuat (D5)	-139.839	59.957	A+, Scratched out #106 and #107, but actually is #106	Glass	https://digital.library.cornell.edu/catalog/ss:3322726
3322727	tve_exp1909_490	Lucia from Terrace Point 1906 site #3 of pan.	Alaska	Yakutat	Lucia Glacier	3	August	1909	USGS Yaktuat (D5)	-139.892	60.0059	A+, new numbers 104, 105, 106, 107, 108|old numbers 116, 117, 108, 104, 105 (North American 2284)	Glass	https://digital.library.cornell.edu/catalog/ss:3322727
3322728	tve_exp1909_491	Lucia from Terrace Point 1906 site	Alaska	Yakutat	Lucia Glacier	3	August	1909	USGS Yaktuat (D5)	-139.892	60.0059	A+,Ledger lists two versions of #108. I think this one corresponds to #105 (scratched out) based on comparing ledger description to words on sleeve and "new numbering scheme"	Glass	https://digital.library.cornell.edu/catalog/ss:3322728
3322729	tve_exp1909_492	Lucia from Terrace Point 1906 site #4 of pan.	Alaska	Yakutat	Lucia Glacier	3	August	1909	USGS Yaktuat (D5)	-139.892	60.0059	A+	Glass	https://digital.library.cornell.edu/catalog/ss:3322729
3322730	tve_exp1909_493	Lucia from Terrace Point 1906 site #3a of pan.	Alaska	Yakutat	Lucia Glacier	3	August	1909	USGS Yaktuat (D5)	-139.892	60.0059	A+	Glass	https://digital.library.cornell.edu/catalog/ss:3322730
3322732	tve_exp1909_495	Long focus of Lucia nunatak from Terrace Point 1906 site	Alaska	Yakutat	Lucia Glacier	7	August	1909	USGS Yaktuat (D5)	-139.892	60.0059	A+	Glass	https://digital.library.cornell.edu/catalog/ss:3322732
3322733	tve_exp1909_496	Atrevida from Terrace Point - not long focus 1906 site	Alaska	Yakutat	Atrevida Glacier	7	August	1909	USGS Yaktuat (D5)	-139.787	59.9709	A+	Glass	https://digital.library.cornell.edu/catalog/ss:3322733
3322734	tve_exp1909_497	Atrevida from Terrace Point (pan. With 111)	Alaska	Yakutat	Atrevida Glacier	7	August	1909	USGS Yaktuat (D5)	-139.787	59.9709	A+	Glass	https://digital.library.cornell.edu/catalog/ss:3322734
3322735	tve_exp1909_498	Atrevida from Terrace Point 1906 site #2 of pan.	Alaska	Yakutat	Atrevida Glacier	7	August	1909	USGS Yaktuat (D5)	-139.787	59.9709	A+	Glass	https://digital.library.cornell.edu/catalog/ss:3322735
3322736	tve_exp1909_499	Long focus of Lucia Nunatak second attempt from Amphi[theatre] Butte	Alaska	Yakutat	Atrevida Glacier		August	1909	USGS Yaktuat (D5)	-139.892	60.0059	C	Glass	https://digital.library.cornell.edu/catalog/ss:3322736
3322737	tve_exp1909_500	Long focus panorama of Lucia Nunatak second attempt from Amphi[theatre] Butte	Alaska	Yakutat	Atrevida Glacier	7	August	1909	USGS Yaktuat (D5)	-139.892	60.0059	C, From Atugh Butte - No, Amphi.	Glass	https://digital.library.cornell.edu/catalog/ss:3322737
12559257	tve_exp1909_500a	Long focus panorama of Lucia Nunatak second attempt from Amphi[theatre] Butte	Alaska	Yakutat	Atrevida Glacier	7	August	1909	USGS Yaktuat (D5)	-139.892	60.0059	C, From Atugh Butte - No, Amphi.	Glass	https://digital.library.cornell.edu/catalog/ss:12559257
12559259	tve_exp1909_500b	Long focus panorama of Lucia Nunatak second attempt from Amphi[theatre] Butte	Alaska	Yakutat	Atrevida Glacier	7	August	1909	USGS Yaktuat (D5)	-139.892	60.0059	C, From Atugh Butte - No, Amphi.	Glass	https://digital.library.cornell.edu/catalog/ss:12559259
3322738	tve_exp1909_501	Long focus panorama of Lucia Nunatak second attempt from Amphi[theatre] Butte	Alaska	Yakutat		11	August	1909	USGS Yaktuat (D5)	-139.892	60.0059	C, notes on sleeve: new nums 116, 117, 118, 119 from old nums 120, 119, 118, 116a	Glass	https://digital.library.cornell.edu/catalog/ss:3322738
3322739	tve_exp1909_502	Panorama from Amphi[theatre] Butte second attempt	Alaska	Yakutat		11	August	1909	USGS Yaktuat (D5)	-139.892	60.0059	B		https://digital.library.cornell.edu/catalog/ss:3322739
3322741	tve_exp1909_504	Ice cave margin of Galiano, Date of second attempt on Amphi[theatre] Butte - Place of outflow lower channel of stream which continuous across fan	Alaska	Yakutat	Galiano Glacier	11	August	1909	USGS Yaktuat (D5)	-139.715	59.9722	A+, Fig. 17	Glass	https://digital.library.cornell.edu/catalog/ss:3322741
3322742	tve_exp1909_505	Depressed shore line at edge of forest, Knight Island	Alaska	Yakutat		11	August	1909	USGS Yakutat (C5)	-139.589	59.711	note on sleeve: "DD=0.6"	Print and Glass	https://digital.library.cornell.edu/catalog/ss:3322742
3322743	tve_exp1909_506	Depressed shore line with trees buried. Knight Isl.	Alaska	Yaktuat		18	August	1909	USGS Yakutat (C5)	-139.589	59.711	A+	Print and Glass	https://digital.library.cornell.edu/catalog/ss:3322743
3322744	tve_exp1909_507	Depressed shore line Knight Island	Alaska	Yakutat		18	August	1909	USGS Yakutat (C5)	-139.589	59.711	A+	Print and Glass	https://digital.library.cornell.edu/catalog/ss:3322744
3322746	tve_exp1909_509	Indian Boys Yakutat	Alaska	Yakutat		18	August	1909	USGS Valdez (A6)	-139.733	59.5468	A+	Glass	https://digital.library.cornell.edu/catalog/ss:3322746
3322747	tve_exp1909_510	Panorama of Valdez Glacier With 128-129 | from front	Alaska	Prince William Sound	Valdez Glacier	18	August	1909	USGS Valdez (A6)	-146.173	61.2051	B	Glass	https://digital.library.cornell.edu/catalog/ss:3322747
3322748	tve_exp1909_511	Panorama of Valdez Glacier With 127-129 | from front	Alaska	Prince William Sound	Valdez Glacier	18	August	1909	USGS Valdez (A6)	-146.173	61.2051	B		https://digital.library.cornell.edu/catalog/ss:3322748
3322749	tve_exp1909_512	Panorama of Valdez Glacier With 127-128 from front	Alaska	Prince William Sound	Valdez Glacier	18	August	1909	USGS Valdez (A6)	-146.173	61.2051	B	Glass	https://digital.library.cornell.edu/catalog/ss:3322749
3322750	tve_exp1909_513	Large Debris cone at eastern margin of Valdez Gl	Alaska	Prince William Sound	Valdez Glacier	18	August	1909	USGS Valdez (A6)	-146.173	61.2051	A+	Glass	https://digital.library.cornell.edu/catalog/ss:3322750
3322751	tve_exp1909_514	Ice surface Valdez Glacier with ice axe	Alaska	Prince William Sound	Valdez Glacier	18	August	1909	USGS Valdez (A6)	-146.173	61.2051	B	Glass	https://digital.library.cornell.edu/catalog/ss:3322751
3322752	tve_exp1909_515	Looking up valley of Valdez Glacier	Alaska	Prince William Sound	Valdez Glacier	18	August	1909	USGS Valdez (A6)	-146.173	61.2051	B	Glass	https://digital.library.cornell.edu/catalog/ss:3322752
3322753	tve_exp1909_516	Maryelen Sea on Valdez Glacier	Alaska	Prince William Sound	Valdez Glacier	20	August	1909	USGS Valdez (A6)	-146.173	61.2051	A+, Fig. 5	Glass	https://digital.library.cornell.edu/catalog/ss:3322753
3322754	tve_exp1909_517	Debris cones on Valdez Glacier	Alaska	Prince William Sound	Valdez Glacier	20	August	1909	USGS Valdez (A6)	-146.173	61.2051		Glass	https://digital.library.cornell.edu/catalog/ss:3322754
3322755	tve_exp1909_518	Valdez Glacier From Grant sites #1	Alaska	Prince William Sound	Valdez Glacier	20	August	1909	USGS Valdez (A6)	-146.173	61.2051	A	Glass	https://digital.library.cornell.edu/catalog/ss:3322755
3322756	tve_exp1909_519	Valdez Glacier From Grant sites #2	Alaska	Prince William Sound	Valdez Glacier	20	August	1909	USGS Valdez (A6)	-146.173	61.2051	A	Glass	https://digital.library.cornell.edu/catalog/ss:3322756
3322757	tve_exp1909_520	Panorama of Shoup new site	Alaska	Prince William Sound	Shoup Glacier	20	August	1909	USGS Valdez (A7)	-146.613	61.1808	B	Glass	https://digital.library.cornell.edu/catalog/ss:3322757
3322758	tve_exp1909_521	Panorama of Shoup from front with 138-139-140-141	Alaska	Prince William Sound	Shoup Glacier	20	August	1909	USGS Valdez (A7)	-146.613	61.1808	B	Glass	https://digital.library.cornell.edu/catalog/ss:3322758
3322759	tve_exp1909_522	Panorama of Shoup new site	Alaska	Prince William Sound	Shoup Glacier	20	August	1909	USGS Valdez (A7)	-146.613	61.1808	B	Glass	https://digital.library.cornell.edu/catalog/ss:3322759
4057649	tve_exp1909_523_02	Panorama of Shoup new site	Alaska	Prince William Sound	Shoup Glacier	20	August	1909	USGS Valdez (A7)	-146.613	61.1808	B	Glass	https://digital.library.cornell.edu/catalog/ss:4057649
3322760	tve_exp1909_523	Panorama of Shoup new site	Alaska	Prince William Sound	Shoup Glacier	20	August	1909	USGS Valdez (A7)	-146.613	61.1808	B	Glass	https://digital.library.cornell.edu/catalog/ss:3322760
3322761	tve_exp1909_524	Panorama of Shoup new site	Alaska	Prince William Sound	Shoup Glacier			1909	USGS Valdez (A7)	-146.613	61.1808	B	Glass	https://digital.library.cornell.edu/catalog/ss:3322761
3322762	tve_exp1909_525	Shoup Glacier From Grant site #1	Alaska	Prince William Sound	Shoup Glacier	20	August	1909	USGS Valdez (A7)	-146.613	61.1808	B, Grant site Fig. 2 [This shouldn't be figure 2, it should be site 2 as it probably refers to one of Grant's photo sites.]	Glass	https://digital.library.cornell.edu/catalog/ss:3322762
3322763	tve_exp1909_526	Shoup Glacier From Grant site #2	Alaska	Prince William Sound	Shoup Glacier	22	August	1909	USGS Valdez (A7)	-146.613	61.1808	B	Glass	https://digital.library.cornell.edu/catalog/ss:3322763
3322764	tve_exp1909_527	Shoup Gl from Lewis Station	Alaska	Prince William Sound	Shoup Glacier	22	August	1909	USGS Valdez (A7)	-146.613	61.1808	B	Glass	https://digital.library.cornell.edu/catalog/ss:3322764
3322765	tve_exp1909_528	Left margin of Shoup Glacier	Alaska	Prince William Sound	Shoup Glacier	23	August	1909	USGS Valdez (A7)	-146.613	61.1808		Glass	https://digital.library.cornell.edu/catalog/ss:3322765
3322767	tve_exp1909_530	Push moraine and destroyed forest | Columbia Glacier	Alaska	Prince William Sound	Columbia Glacier	23	August	1909	USGS Seward (D1)	-147.077	61.0958	A+, North America 3151	Glass	https://digital.library.cornell.edu/catalog/ss:3322767
3322768	tve_exp1909_531	Ice in forest east side Columbia Glacier	Alaska	Prince William Sound	Columbia Glacier	23	August	1909	USGS Seward (D1), Anchorage (A1)	-147.077	61.0958	A+	Glass	https://digital.library.cornell.edu/catalog/ss:3322768
3322769	tve_exp1909_532	Gilbert site - Columbia Glacier W. side	Alaska	Prince William Sound	Columbia Glacier	23	August	1909	USGS Seward (D1), Anchorage (A1)	-147.077	61.0958	A	Glass	https://digital.library.cornell.edu/catalog/ss:3322769
3322770	tve_exp1909_533	Ice "climbing trees" Columbia Glacier	Alaska	Prince William Sound	Columbia Glacier	23	August	1909	USGS Seward (D1), Anchorage (A1)	-147.077	61.0958	A+, North America 3163	Glass	https://digital.library.cornell.edu/catalog/ss:3322770
3322771	tve_exp1909_534	Ice "climbing trees"	Alaska	Prince William Sound	Columbia Glacier	23	August	1909	USGS Seward (D1), Anchorage (A1)	-147.077	61.0958	A+	Glass	https://digital.library.cornell.edu/catalog/ss:3322771
3322772	tve_exp1909_535	Ice "Climbing Trees," Columbia Glacier	Alaska	Prince William Sound	Columbia Glacier	23	August	1909	USGS Seward (D1), Anchorage (A1)	-147.077	61.0958	A+	Glass	https://digital.library.cornell.edu/catalog/ss:3322772
3322773	tve_exp1909_536	Turf rolls, Peat Push Morain. Columbia Glacier	Alaska	Prince William Sound	Columbia Glacier	23	August	1909	USGS Seward (D1), Anchorage (A1)	-147.077	61.0958	Glpay Get detail (as much as possible in foreground earth masses)	Glass	https://digital.library.cornell.edu/catalog/ss:3322773
3322775	tve_exp1909_538	Panorama Columbia Glacier 1450 Foot	Alaska	Prince William Sound	Columbia Glacier	23	August	1909	USGS Seward (D1), Anchorage (A1)	-147.077	61.0958	B	Glass	https://digital.library.cornell.edu/catalog/ss:3322775
3322776	tve_exp1909_539	Panorama Columbia Glacier 1450 Foot	Alaska	Prince William Sound	Columbia Glacier			1909	USGS Seward (D1), Anchorage (A1)	-147.077	61.0958	B	Glass	https://digital.library.cornell.edu/catalog/ss:3322776
3322777	tve_exp1909_540	Panorama Columbia Glacier 1450 Foot	Alaska	Prince William Sound	Columbia Glacier			1909	USGS Seward (D1), Anchorage (A1)	-147.077	61.0958	B	Glass	https://digital.library.cornell.edu/catalog/ss:3322777
3322778	tve_exp1909_541	Long focus up valley Columbia Glacier 1450 Foot site east margin	Alaska	Prince William Sound	Columbia Glacier			1909	USGS Seward (D1), Anchorage (A1)	-147.077	61.0958	B	Glass	https://digital.library.cornell.edu/catalog/ss:3322778
3322779	tve_exp1909_542	Long focus down valley Columbia Glacier Gilbert 1450 Foot site	Alaska	Prince William Sound	Columbia Glacier			1909	USGS Seward (D1), Anchorage (A1)	-147.077	61.0958	B+	Glass	https://digital.library.cornell.edu/catalog/ss:3322779
12556262		von Engeln in Alaska, smoking and reading notes behind iceberg (prints in box 4)	Alaska	Yakutat									Film Negative	https://digital.library.cornell.edu/catalog/ss:12556262
3322085	tve_exp1911_001	Pits on surface of Kennicott Glacier	Alaska	Wrangell Mountains	Kennicott Glacier			1911	USGS McCarthy (B6, C6)	-143.04	61.6167		Film Negative	https://digital.library.cornell.edu/catalog/ss:3322085
3322086	tve_exp1911_002	Granular surface, Kennicott Glacier	Alaska	Wrangell Mountains	Kennicott Glacier			1911	USGS McCarthy (B6, C6)	-143.04	61.6167		Film Negative	https://digital.library.cornell.edu/catalog/ss:3322086
3322087	tve_exp1911_003	Surface of rock glacier showing depressions or kettles	Alaska	Wrangell Mountains				1911	USGS McCarthy (B6, C6)	-143.04	61.6167		Film Negative	https://digital.library.cornell.edu/catalog/ss:3322087
3322088	tve_exp1911_004	Cutting canal in Spencer Glacier for diverting marginal streams	Alaska	Kenai Peninsula	Spencer Glacier			1911	USGS Seward (C6)	-148.976	60.6734		Film Negative	https://digital.library.cornell.edu/catalog/ss:3322088
3322089	tve_exp1911_005	Drawing derrick over outwash gravel plain	Alaska	Kenai Peninsula				1911	USGS Seward (C6)	-148.976	60.6734		Film Negative	https://digital.library.cornell.edu/catalog/ss:3322089
3322090	tve_exp1911_006	Front of Spencer Glacier with fosse and outwash plain - east side	Alaska	Kenai Peninsula	Spencer Glacier			1911	USGS Seward (C6)	-148.976	60.6734		Film Negative	https://digital.library.cornell.edu/catalog/ss:3322090
3322091	tve_exp1911_007	Front of Spencer Glacier - from east side	Alaska	Kenai Peninsula	Spencer Glacier			1911	USGS Seward (C6)	-148.976	60.6734		Film Negative	https://digital.library.cornell.edu/catalog/ss:3322091
3322092	tve_exp1911_008	Marginal channel and glaciel stream. East side, Spencer Glacier	Alaska	Kenai Peninsula	Spencer Glacier			1911	USGS Seward (C6)	-148.976	60.6734		Film Negative	https://digital.library.cornell.edu/catalog/ss:3322092
3322093	tve_exp1911_009	Glacial Stream and east margin of Spencer Glacier	Alaska	Kenai Peninsula	Spencer Glacier			1911	USGS Seward (C6)	-148.976	60.6734		Film Negative	https://digital.library.cornell.edu/catalog/ss:3322093
3322094	tve_exp1911_010	Granular Ice Surface, Spencer Glacier	Alaska	Kenai Peninsula	Spencer Glacier			1911	USGS Seward (C6)	-148.976	60.6734		Film Negative	https://digital.library.cornell.edu/catalog/ss:3322094
3322095	tve_exp1911_011	Outwash gravel plain from Spencer Glacier	Alaska	Kenai Peninsula	Spencer Glacier			1911	USGS Seward (C6)	-148.976	60.6734		Film Negative	https://digital.library.cornell.edu/catalog/ss:3322095
3322096	tve_exp1911_012	Panorama. Outwash Plain from Spencer Glacier	Alaska	Kenai Peninsula	Spencer Glacier			1911	USGS Seward (C6)	-148.976	60.6734		Film Negative	https://digital.library.cornell.edu/catalog/ss:3322096
3322097	tve_exp1911_013	Blasting glacier in making ditch for diversion	Alaska	Kenai Peninsula				1911	USGS Seward (C6)	-148.976	60.6734		Film Negative	https://digital.library.cornell.edu/catalog/ss:3322097
3322098	tve_exp1911_014	Diversion ditch, Spencer Glacier	Alaska	Kenai Peninsula	Spencer Glacier			1911	USGS Seward (C6)	-148.976	60.6734		Film Negative	https://digital.library.cornell.edu/catalog/ss:3322098
3322099	tve_exp1911_015	Fosse in front of Spencer Glacier	Alaska	Kenai Peninsula	Spencer Glacier			1911	USGS Seward (C6)	-148.976	60.6734		Film Negative	https://digital.library.cornell.edu/catalog/ss:3322099
3322100	tve_exp1911_016	Fosse in front of Spencer Glacier	Alaska	Kenai Peninsula	Spencer Glacier			1911	USGS Seward (C6)	-148.976	60.6734		Film Negative	https://digital.library.cornell.edu/catalog/ss:3322100
3322101	tve_exp1911_017	Ice tunnel in fosse at front of Spencer Glacier	Alaska	Kenai Peninsula	Spencer Glacier			1911	USGS Seward (C6)	-148.976	60.6734		Film Negative	https://digital.library.cornell.edu/catalog/ss:3322101
3322102	tve_exp1911_018	Effect of glacial stream from Spencer Glacier	Alaska	Kenai Peninsula	Spencer Glacier			1911	USGS Seward (C6)	-148.976	60.6734		Film Negative	https://digital.library.cornell.edu/catalog/ss:3322102
3322103	tve_exp1911_019	Alaska Northern track on outwash gravel plain	Alaska	Kenai Peninsula				1911	USGS Seward (C6)	-148.976	60.6734		Film Negative	https://digital.library.cornell.edu/catalog/ss:3322103
3322104	tve_exp1911_020	Track shifted by glacial stream from Spencer Glacier	Alaska	Kenai Peninsula	Spencer Glacier			1911	USGS Seward (C6)	-148.976	60.6734		Film Negative	https://digital.library.cornell.edu/catalog/ss:3322104
3322105	tve_exp1911_021	Dam destroyed by Spencer Glacier stream	Alaska	Kenai Peninsula	Spencer Glacier			1911	USGS Seward (C6)	-148.976	60.6734		Film Negative	https://digital.library.cornell.edu/catalog/ss:3322105
3322106	tve_exp1911_022	Outer border of moraine of former recent advance of Spencer Glacier	Alaska	Kenai Peninsula	Spencer Glacier			1911	USGS Seward (C6)	-148.976	60.6734		Film Negative	https://digital.library.cornell.edu/catalog/ss:3322106
3322107	tve_exp1911_023	Outer margin of moraine of recent stand of Spencer Glacier	Alaska	Kenai Peninsula	Spencer Glacier			1911	USGS Seward (C6)	-148.976	60.6734		Film Negative	https://digital.library.cornell.edu/catalog/ss:3322107
3322108	tve_exp1911_024	Outer margin of moraine of Spencer Glacier	Alaska	Kenai Peninsula	Spencer Glacier			1911	USGS Seward (C6)	-148.976	60.6734		Film Negative	https://digital.library.cornell.edu/catalog/ss:3322108
3322109	tve_exp1911_025	Front of Spencer Glacier, western part	Alaska	Kenai Peninsula	Spencer Glacier			1911	USGS Seward (C6)	-148.976	60.6734		Film Negative	https://digital.library.cornell.edu/catalog/ss:3322109
3322110	tve_exp1911_026	Crevassed western margin of Spencer Glacier	Alaska	Kenai Peninsula	Spencer Glacier			1911	USGS Seward (C6)	-148.976	60.6734		Film Negative	https://digital.library.cornell.edu/catalog/ss:3322110
3322111	tve_exp1911_027	Crevassed western margin of Spencer Glacier	Alaska	Kenai Peninsula	Spencer Glacier			1911	USGS Seward (C6)	-148.976	60.6734		Film Negative	https://digital.library.cornell.edu/catalog/ss:3322111
3322112	tve_exp1911_028	Crevassed western margin, Spencer Glacier	Alaska	Kenai Peninsula	Spencer Glacier			1911	USGS Seward (C6)	-148.976	60.6734		Film Negative	https://digital.library.cornell.edu/catalog/ss:3322112
3322113	tve_exp1911_029	Building brush dam to divert Spencer Glacier stream	Alaska	Kenai Peninsula	Spencer Glacier			1911	USGS Seward (C6)	-148.976	60.6734		Film Negative	https://digital.library.cornell.edu/catalog/ss:3322113
3322114	tve_exp1911_030	Building dam to aid in diverting Spencer Glacier stream	Alaska	Kenai Peninsula	Spencer Glacier			1911	USGS Seward (C6)	-148.976	60.6734		Film Negative	https://digital.library.cornell.edu/catalog/ss:3322114
3322115	tve_exp1911_031	Building dam in diverting Spencer stream	Alaska	Kenai Peninsula	Spencer Glacier			1911	USGS Seward (C6)	-148.976	60.6734		Film Negative	https://digital.library.cornell.edu/catalog/ss:3322115
3322116	tve_exp1911_032	Front of Spencer Glacier - with stream boiling out of ice tunnel	Alaska	Kenai Peninsula	Spencer Glacier			1911	USGS Seward (C6)	-148.976	60.6734		Film Negative	https://digital.library.cornell.edu/catalog/ss:3322116
3322117	tve_exp1911_033	Stream boiling out of buried ice in front of Spencer Glacier	Alaska	Kenai Peninsula	Spencer Glacier			1911	USGS Seward (C6)	-148.976	60.6734		Film Negative	https://digital.library.cornell.edu/catalog/ss:3322117
3322118	tve_exp1911_034	Waterfall from west margin, Spencer Glacier	Alaska	Kenai Peninsula	Spencer Glacier			1911	USGS Seward (C6)	-148.976	60.6734		Film Negative	https://digital.library.cornell.edu/catalog/ss:3322118
3322119	tve_exp1911_035	Snow cut, just opened Alaska Northern Ry.	Alaska	Kenai Peninsula				1911	USGS Seward (C6)	-148.976	60.6734		Film Negative	https://digital.library.cornell.edu/catalog/ss:3322119
3322120	tve_exp1911_036	Waterfall, from west margin of Spencer Glacier	Alaska	Kenai Peninsula	Spencer Glacier			1911	USGS Seward (C6)	-148.976	60.6734		Film Negative	https://digital.library.cornell.edu/catalog/ss:3322120
3322121	tve_exp1911_037	Old bridge over stream in gorge - west side Spencer Glacier	Alaska	Kenai Peninsula	Spencer Glacier			1911	USGS Seward (C6)	-148.976	60.6734		Film Negative	https://digital.library.cornell.edu/catalog/ss:3322121
3322122	tve_exp1911_038	Plucked rock- Hill north of east end, Spencer Glacier	Alaska	Kenai Peninsula	Spencer Glacier			1911	USGS Seward (C6)	-148.976	60.6734		Film Negative	https://digital.library.cornell.edu/catalog/ss:3322122
3322123	tve_exp1911_039	Indians in canoe	Alaska					1911					Film Negative	https://digital.library.cornell.edu/catalog/ss:3322123
3322124	tve_exp1911_040	Rear end of Train, Alaska Northern Ry.	Alaska					1911					Film Negative	https://digital.library.cornell.edu/catalog/ss:3322124
3322125	tve_exp1911_041	Alaska Northern Ry (" Straus 3/25-29")	Alaska					1911					Film Negative	https://digital.library.cornell.edu/catalog/ss:3322125
3322126	tve_exp1911_042	Street in Dawson	Canada	Yukon				1911	NRC 116B03	-139.437	64.0574		Film Negative	https://digital.library.cornell.edu/catalog/ss:3322126
3322127	tve_exp1911_043	Kennicott Glacier (Eastern Margin)	Alaska	Wrangell Mountains	Kennicott Glacier			1911	USGS McCarthy (B6, C6)	-143.04	61.6167		Film Negative	https://digital.library.cornell.edu/catalog/ss:3322127
3322128	tve_exp1911_044	Rock glacier at Jumbo Mine	Alaska	Wrangell Mountains				1911	USGS McCarthy (C5)	-142.851	61.5227		Film Negative	https://digital.library.cornell.edu/catalog/ss:3322128
3322129	tve_exp1911_045	Chitina	Alaska	Wrangell Mountains				1911	USGS Valdez (C2)	-144.444	61.5167		Film Negative	https://digital.library.cornell.edu/catalog/ss:3322129
3322130	tve_exp1911_046	Copper River Valley	Alaska	Wrangell Mountains				1911					Film Negative	https://digital.library.cornell.edu/catalog/ss:3322130
3322131	tve_exp1911_047	Discovery below Cleary Creek	Alaska	Interior				1911		-147.506	65.1137		Film Negative	https://digital.library.cornell.edu/catalog/ss:3322131
3322132	tve_exp1911_048	Salmon Wheel on Tanana River	Alaska	Interior				1911					Film Negative	https://digital.library.cornell.edu/catalog/ss:3322132
3322133	tve_exp1911_049	Tanana River below hot springs	Alaska	Interior				1911					Film Negative	https://digital.library.cornell.edu/catalog/ss:3322133
3322134	tve_exp1911_050	Tertiary bluffs on Yukon above Rampart	Alaska	Interior				1911	USGS Tanana (C1)	-150.175	65.5061		Film Negative	https://digital.library.cornell.edu/catalog/ss:3322134
3322135	tve_exp1911_051	Fort Yukon	Alaska	Interior				1911	USGS Fort Yukon (C3)	-145.254	66.5669		Film Negative	https://digital.library.cornell.edu/catalog/ss:3322135
3322136	tve_exp1911_052	Yukon Canon between Circle City and Eagle	Alaska	Interior				1911	USGS Charley R				Film Negative	https://digital.library.cornell.edu/catalog/ss:3322136
3322137	tve_exp1911_053	Folding Banks - Yukon	Alaska	Interior				1911					Film Negative	https://digital.library.cornell.edu/catalog/ss:3322137
3322138	tve_exp1911_054	Hanging Tributary Valley - west side Yukon	Alaska	Interior				1911					Film Negative	https://digital.library.cornell.edu/catalog/ss:3322138
3322139	tve_exp1911_055	Indian Village on Yukon above Rampart	Alaska	Interior				1911	USGS Tanana (C1)	-150.175	65.5061		Film Negative	https://digital.library.cornell.edu/catalog/ss:3322139
3322140	tve_exp1911_056	Folded Chert, Calico Bluff, Yukon River	Alaska	Interior				1911	USGS Eagle (D1)	-141.192	64.9101		Film Negative	https://digital.library.cornell.edu/catalog/ss:3322140
3322141	tve_exp1911_057	Folded Chert, Calico Bluff, Yukon River	Alaska	Interior				1911	USGS Eagle (D1)	-141.192	64.9101		Film Negative	https://digital.library.cornell.edu/catalog/ss:3322141
3322142	tve_exp1911_058	Gravels on old planated valley floor, Yukon River	Alaska	Interior				1911					Film Negative	https://digital.library.cornell.edu/catalog/ss:3322142
3322143	tve_exp1911_059	Lake Atlin looking southward	Canada	British Columbia				1911	NRC 104N	-133.723	59.576		Film Negative	https://digital.library.cornell.edu/catalog/ss:3322143
3322144	tve_exp1911_060	Trail and mountain from White Pass Ry	Canada	British Columbia				1911					Film Negative	https://digital.library.cornell.edu/catalog/ss:3322144
3322145	tve_exp1911_061	White pass from below	Canada	British Columbia				1911	NRC 104M11				Film Negative	https://digital.library.cornell.edu/catalog/ss:3322145
3322146	tve_exp1911_062	Hanging Valley - Taiya Inlet below Skagway	Alaska	Southern Panhandle				1911	USGS Skagway (B1)	-135.366	59.3817		Film Negative	https://digital.library.cornell.edu/catalog/ss:3322146
3322147	tve_exp1911_063	Glaciers east side, upper part of Lynn Canal	Alaska	Southern Panhandle				1911	USGS Skagway (A1)	-135.151	58.8161		Film Negative	https://digital.library.cornell.edu/catalog/ss:3322147
3322148	tve_exp1911_064	Crystalline Ice - Muir Inlet	Alaska	Glacier Bay				1911	USGS Skagway (A4)	-136.088	58.8708		Film Negative	https://digital.library.cornell.edu/catalog/ss:3322148
3322149	tve_exp1911_065	Sculptured gravel cliff - McBride's terminus. Muir Glacier	Alaska	Glacier Bay	Muir Glacier			1911	USGS Skagway (A3, A4)	-136.376	59.1178		Film Negative	https://digital.library.cornell.edu/catalog/ss:3322149
3322150	tve_exp1911_066	Ice on gravel margin, McBride and Casement glaciers	Alaska	Glacier Bay	McBride Glacier, Casement Glacier			1911	USGS Skagway (A3), Juneau (D6)	-136.067	59.0672		Film Negative	https://digital.library.cornell.edu/catalog/ss:3322150
3322151	tve_exp1911_067	Ice cave in glacial stream between McBride and Casement glaciers	Alaska	Glacier Bay	McBride Glacier			1911	USGS Skagway (A3)	-136.067	59.0672		Film Negative	https://digital.library.cornell.edu/catalog/ss:3322151
3322152	tve_exp1911_068	McBride Glacier, on gravels	Alaska	Glacier Bay	McBride Glacier			1911	USGS Skagway (A3)	-136.067	59.0672		Film Negative	https://digital.library.cornell.edu/catalog/ss:3322152
3322153	tve_exp1911_069	Morse Glacier	Alaska	Glacier Bay	Morse Glacier			1911	USGS Skagway (A4)	-136.426	59.1143		Film Negative	https://digital.library.cornell.edu/catalog/ss:3322153
3322154	tve_exp1911_070	Boat in Tidal Inlet	Alaska	Glacier Bay				1911	USGS Mount Fairweather (D1, D2)	-136.332	58.8243		Film Negative	https://digital.library.cornell.edu/catalog/ss:3322154
3322155	tve_exp1911_071	Small unnamed cascading glacier | NW side, Rendu Inlet	Alaska	Glacier Bay	Rendu Glacier			1911	USGS Mount Fairweather (D3)	-136.661	58.9618		Film Negative	https://digital.library.cornell.edu/catalog/ss:3322155
3322156	tve_exp1911_072	Panorama, Rendu Glacier	Alaska	Glacier Bay	Rendu Glacier			1911	USGS Skagway (A5)	-136.76	59.0502		Film Negative	https://digital.library.cornell.edu/catalog/ss:3322156
3322157	tve_exp1911_073	Panorama of Rendu Glacier	Alaska	Glacier Bay	Rendu Glacier			1911	USGS Skagway (A5)	-136.76	59.0502		Film Negative	https://digital.library.cornell.edu/catalog/ss:3322157
3322158	tve_exp1911_074	Panorama of Rendu Glacier	Alaska	Glacier Bay	Rendu Glacier			1911	USGS Skagway (A5)	-136.76	59.0502		Film Negative	https://digital.library.cornell.edu/catalog/ss:3322158
3322159	tve_exp1911_075	Gravels gulled[?] north side entrance to tidal inlet	Alaska	Glacier Bay				1911	USGS Mount Fairweather (D1, D2)	-136.332	58.8243		Film Negative	https://digital.library.cornell.edu/catalog/ss:3322159
3322160	tve_exp1911_076	Margin of Wood Glacier	Alaska	Glacier Bay	Wood Glacier			1911	USGS Mount Fairweather (C2)	-136.442	58.5479		Film Negative	https://digital.library.cornell.edu/catalog/ss:3322160
3322161	tve_exp1911_077	Davidson Glacier from front	Alaska	Glacier Bay	Davidson Glacier			1911	USGS Skagway (A2)	-135.496	59.079		Film Negative	https://digital.library.cornell.edu/catalog/ss:3322161
3322162	tve_exp1911_078	Taku Glacier from fiord	Alaska	Juneau	Taku Glacier			1911	USGS Juneau (B1)	-134.072	58.4441		Film Negative	https://digital.library.cornell.edu/catalog/ss:3322162
3322163	tve_exp1911_079	Taku Glacier from fiord	Alaska	Juneau	Taku Glacier			1911	USGS Juneau (B1)	-134.072	58.4441		Film Negative	https://digital.library.cornell.edu/catalog/ss:3322163
3322164	tve_exp1911_080	Norris Glacier, from out in Taku Inlet	Alaska	Juneau	Norris Glacier			1911	USGS Juneau (B1)	-134.172	58.4301		Film Negative	https://digital.library.cornell.edu/catalog/ss:3322164
3322165	tve_exp1911_081	Hanging Valley - Inside Passage	Alaska	Southern Panhandle				1911					Film Negative	https://digital.library.cornell.edu/catalog/ss:3322165
3322167	tve_exp1911_083	Mountain back of Kennicott Mine Camp	Alaska	Wrangell Mountains				1911	USGS McCarthy (B6, C6)	-142.886	61.4819		Film Negative	https://digital.library.cornell.edu/catalog/ss:3322167
3322168	tve_exp1911_084	Mine Camp and east view of Kennicott Glacier	Alaska	Wrangell Mountains	Kennicott Glacier			1911	USGS McCarthy (B6, C6)	-142.886	61.4819		Film Negative	https://digital.library.cornell.edu/catalog/ss:3322168
3322169	tve_exp1911_085	Tundra, etc. on Copper railway between Kennicott and Chitina	Alaska	Wrangell Mountains				1911	USGS McCarthy				Film Negative	https://digital.library.cornell.edu/catalog/ss:3322169
3322170	tve_exp1911_086	View south from Copper River Ry. Between Kennicott and Chitina	Alaska	Wrangell Mountains				1911	USGS McCarthy				Film Negative	https://digital.library.cornell.edu/catalog/ss:3322170
3322171	tve_exp1911_087	Effects of forest fire near Willow Creek road house	Alaska	Wrangell Mountains				1911	USGS Valdez (D4)	-145.217	61.8174		Film Negative	https://digital.library.cornell.edu/catalog/ss:3322171
3322172	tve_exp1911_088	Trail from Chitina	Alaska	Wrangell Mountains				1911					Film Negative	https://digital.library.cornell.edu/catalog/ss:3322172
3322173	tve_exp1911_089	Willow Creek road house	Alaska	Wrangell Mountains				1911	USGS Valdez (D4)	-145.217	61.8174		Film Negative	https://digital.library.cornell.edu/catalog/ss:3322173
3322174	tve_exp1911_090	Field of oats. Willow Creek road house.	Alaska	Wrangell Mountains				1911	USGS Valdez (D4)	-145.217	61.8174		Film Negative	https://digital.library.cornell.edu/catalog/ss:3322174
3322175	tve_exp1911_091	Old forest fire on Valdez trail	Alaska	Wrangell Mountains				1911					Film Negative	https://digital.library.cornell.edu/catalog/ss:3322175
3322176	tve_exp1911_092	Cooper River Valley near Tazlina road house	Alaska	Wrangell Mountains				1911	USGS Gulkana (A3)	-145.411	62.0446		Film Negative	https://digital.library.cornell.edu/catalog/ss:3322176
3322177	tve_exp1911_093	Copper River Valley near Copper Center	Alaska	Wrangell Mountains				1911	USGS Valdez (D4)	-145.309	61.954		Film Negative	https://digital.library.cornell.edu/catalog/ss:3322177
3322178	tve_exp1911_094	Gulkana Valley and plateau in distance	Alaska	Wrangell Mountains				1911		-145.45	62.206		Film Negative	https://digital.library.cornell.edu/catalog/ss:3322178
3322179	tve_exp1911_095	Ferry at Gulkana	Alaska	Wrangell Mountains				1911	USGS Gulkana (A3)	-145.45	62.206		Film Negative	https://digital.library.cornell.edu/catalog/ss:3322179
3322180	tve_exp1911_096	Cliff on Yukon above Dawson	Canada	Yukon				1911	NRC 116B03	-139.437	64.0574		Film Negative	https://digital.library.cornell.edu/catalog/ss:3322180
3322181	tve_exp1911_097	Indian on Valdez Trail	Alaska	Interior				1911					Film Negative	https://digital.library.cornell.edu/catalog/ss:3322181
3322182	tve_exp1911_098	Gulkana Lake	Alaska	Wrangell Mountains				1911		-145.45	62.206		Film Negative	https://digital.library.cornell.edu/catalog/ss:3322182
3322183	tve_exp1911_099	Garden at Meiers road house	Alaska	Interior				1911	USGS Gulkana (D3)	-145.498	62.8171		Film Negative	https://digital.library.cornell.edu/catalog/ss:3322183
3322184	tve_exp1911_100	Mount Drum from near Meiers road house	Alaska	Wrangell Mountains				1911	USGS Gulkana (D3)	-144.641	62.1164		Film Negative	https://digital.library.cornell.edu/catalog/ss:3322184
3322185	tve_exp1911_101	Garden at Sour Dough road house	Alaska	Interior				1911	USGS Gulkana (B3)	-145.518	62.5292		Film Negative	https://digital.library.cornell.edu/catalog/ss:3322185
3322186	tve_exp1911_102	Road near Sour Dough road house	Alaska	Interior				1911	USGS Gulkana (B3)	-145.518	62.5292		Film Negative	https://digital.library.cornell.edu/catalog/ss:3322186
3322188	tve_exp1911_104	Lakes near base of Alaska Range	Alaska	Interior				1911					Film Negative	https://digital.library.cornell.edu/catalog/ss:3322188
3322189	tve_exp1911_105	Stand car on Fairbanks Railway	Alaska	Interior				1911					Film Negative	https://digital.library.cornell.edu/catalog/ss:3322189
3322190	tve_exp1911_106	Car rising from shaft Chatanika	Alaska	Interior				1911	USGS Livengood (A1)	-147.477	65.1112		Film Negative	https://digital.library.cornell.edu/catalog/ss:3322190
3322191	tve_exp1911_107	Car dumping gravels in sluice box - Chatanika	Alaska	Interior				1911	USGS Livengood (A1)	-147.477	65.1112		Film Negative	https://digital.library.cornell.edu/catalog/ss:3322191
3322194	tve_exp1911_110	Miner's house - Cleary	Alaska	Interior				1911	USGS Livengood (A1)	-147.506	65.1137		Film Negative	https://digital.library.cornell.edu/catalog/ss:3322194
3322195	tve_exp1911_111	Cleary looking west	Alaska	Interior				1911	USGS Livengood (A1)	-147.506	65.1137		Film Negative	https://digital.library.cornell.edu/catalog/ss:3322195
3322196	tve_exp1911_112	Lode Mine - Cleary Creek. Fairbanks Dist.	Alaska	Interior				1911	USGS Livengood (A1)	-147.506	65.1137		Film Negative	https://digital.library.cornell.edu/catalog/ss:3322196
3322197	tve_exp1911_113	Upper Cleary Valley showing Peneplane	Alaska	Interior				1911	USGS Livengood (A1)	-147.506	65.1137		Film Negative	https://digital.library.cornell.edu/catalog/ss:3322197
3322198	tve_exp1911_114	House with flower garden - Golden City - Fairbanks District	Alaska	Interior				1911	USGS Fairbanks (D2)	-147.469	65.0309		Film Negative	https://digital.library.cornell.edu/catalog/ss:3322198
3322199	tve_exp1911_115	Tributary valley at. Accordant Grade, Golden City. East side Pedro Creek.	Alaska	Interior				1911	USGS Fairbanks (D2)	-147.469	65.0309		Film Negative	https://digital.library.cornell.edu/catalog/ss:3322199
3322200	tve_exp1911_116	Sluice box. Bigelow Mine, Gilmore	Alaska	Interior				1911	USGS Fairbanks (D2)	-147.459	64.9835		Film Negative	https://digital.library.cornell.edu/catalog/ss:3322200
3322201	tve_exp1911_117	Street scene - Fairbanks, Alaska	Alaska	Interior				1911	USGS Fairbanks (D2)	-147.71	64.8213		Film Negative	https://digital.library.cornell.edu/catalog/ss:3322201
3322202	tve_exp1911_118	Water front Fairbanks - showing Steamer Schwatka	Alaska	Interior				1911	USGS Fairbanks (D2)	-147.71	64.8213		Film Negative	https://digital.library.cornell.edu/catalog/ss:3322202
3322203	tve_exp1911_119	Private house - Fairbanks	Alaska	Interior				1911	USGS Fairbanks (D2)	-147.71	64.8213		Film Negative	https://digital.library.cornell.edu/catalog/ss:3322203
3322204	tve_exp1911_120	Street scene - Fairbanks, Alaska	Alaska	Interior				1911	USGS Fairbanks (D2)	-147.71	64.8213		Film Negative	https://digital.library.cornell.edu/catalog/ss:3322204
3322205	tve_exp1911_121	Street scene - Fairbanks, Alaska	Alaska	Interior				1911	USGS Fairbanks (D2)	-147.71	64.8213		Film Negative	https://digital.library.cornell.edu/catalog/ss:3322205
3322206	tve_exp1911_122	Tanana River above Tolovana	Alaska	Interior				1911		-149.8243 6	4.8533		Film Negative	https://digital.library.cornell.edu/catalog/ss:3322206
3322207	tve_exp1911_123	Cut bank and sweepers - Tanana River	Alaska	Interior				1911					Film Negative	https://digital.library.cornell.edu/catalog/ss:3322207
3322208	tve_exp1911_124	Taking on wood - Tanana River	Alaska	Interior				1911					Film Negative	https://digital.library.cornell.edu/catalog/ss:3322208
3322209	tve_exp1911_125	Yukon River between Fort Gibbon and Rampart	Alaska	Interior				1911	USGS Tanana				Film Negative	https://digital.library.cornell.edu/catalog/ss:3322209
3322210	tve_exp1911_126	Terraces east side Yukon River	Alaska	Interior				1911					Film Negative	https://digital.library.cornell.edu/catalog/ss:3322210
3322211	tve_exp1911_127	Rampart city from river	Alaska	Interior				1911	USGS Tanana (C1)	-150.175	65.5061		Film Negative	https://digital.library.cornell.edu/catalog/ss:3322211
3322212	tve_exp1911_128	Steamer (Schwatka) and its tow - Rampart City.	Alaska	Interior				1911	USGS Tanana (C1)	-150.175	65.5061		Film Negative	https://digital.library.cornell.edu/catalog/ss:3322212
3322213	tve_exp1911_129	Yukon above Rampart	Alaska	Interior				1911	USGS Tanana (C1)	-150.175	65.5061		Film Negative	https://digital.library.cornell.edu/catalog/ss:3322213
3322214	tve_exp1911_130	Loess on Yukon in Yukon Flats above Fort Hamlin	Alaska	Interior				1911	USGS Livengood (D5)	-149.229	65.8922		Film Negative	https://digital.library.cornell.edu/catalog/ss:3322214
3322215	tve_exp1911_131	Yukon Flats near Fort Yukon	Alaska	Interior				1911	USGS Fort Yukon (B4,B5)	-145.254	66.5669		Film Negative	https://digital.library.cornell.edu/catalog/ss:3322215
3322216	tve_exp1911_132	Yukon between Circle City and Eagle	Alaska	Interior				1911	USGS Charley R				Film Negative	https://digital.library.cornell.edu/catalog/ss:3322216
3322217	tve_exp1911_133	St. Michael on the Yukon	Alaska	Interior				1911					Film Negative	https://digital.library.cornell.edu/catalog/ss:3322217
3322218	tve_exp1911_134	Yukon Flats	Alaska	Interior				1911	USGS Fort Yukon (B4, B5)				Film Negative	https://digital.library.cornell.edu/catalog/ss:3322218
3322219	tve_exp1911_135	Indians loading wood Yukon	Alaska	Interior				1911					Film Negative	https://digital.library.cornell.edu/catalog/ss:3322219
3322220	tve_exp1911_136	Indian dogs at Beaver - Yukon	Alaska	Interior				1911	USGS Beaver (B1)	-147.3975 6	6.35972		Film Negative	https://digital.library.cornell.edu/catalog/ss:3322220
3322221	tve_exp1911_137	Cottonwood grove Arctic Circle	Alaska	Interior				1911					Film Negative	https://digital.library.cornell.edu/catalog/ss:3322221
3322222	tve_exp1911_138	Wood pile on Arctic Circle Yukon River	Alaska	Interior				1911	USGS Fort Yukon (C4)				Film Negative	https://digital.library.cornell.edu/catalog/ss:3322222
3322223	tve_exp1911_139	Sunset on Arctic Circle Yukon River - 9:30 PM	Alaska	Interior				1911	USGS Fort Yukon (C4)				Film Negative	https://digital.library.cornell.edu/catalog/ss:3322223
3322224	tve_exp1911_140	Fort Yukon	Alaska	Interior				1911	USGS Fort Yukon (C3)	-145.254	66.5669		Film Negative	https://digital.library.cornell.edu/catalog/ss:3322224
3322225	tve_exp1911_141	Indian dogs, Fort Yukon	Alaska	Interior				1911	USGS Fort Yukon (C3)	-145.254	66.5669		Film Negative	https://digital.library.cornell.edu/catalog/ss:3322225
3322226	tve_exp1911_142	Fort Yukon	Alaska	Interior				1911	USGS Fort Yukon (C3)	-145.254	66.5669		Film Negative	https://digital.library.cornell.edu/catalog/ss:3322226
3322227	tve_exp1911_143	Yukon Flats above Fort Yukon	Alaska	Interior				1911	USGS Fort Yukon (B4, B5)	-145.254	66.5669		Film Negative	https://digital.library.cornell.edu/catalog/ss:3322227
3322228	tve_exp1911_144	Government school house, Circle City, Yukon River.	Alaska	Interior				1911	USGS Circle (D1)	-144.06	65.8209		Film Negative	https://digital.library.cornell.edu/catalog/ss:3322228
3322229	tve_exp1911_145	Yukon Canon between Circle City and Eagle	Alaska	Interior				1911	USGS Charley R				Film Negative	https://digital.library.cornell.edu/catalog/ss:3322229
3322230	tve_exp1911_146	Yukon Canon between Circle City and Eagle	Alaska	Interior				1911	USGS Charley R				Film Negative	https://digital.library.cornell.edu/catalog/ss:3322230
3322231	tve_exp1911_147	Yukon Canon between Circle City and Eagle	Alaska	Interior				1911	USGS Charley R				Film Negative	https://digital.library.cornell.edu/catalog/ss:3322231
3322232	tve_exp1911_148	Yukon Canon between Circle City and Eagle	Alaska	Interior				1911	USGS Charley R				Film Negative	https://digital.library.cornell.edu/catalog/ss:3322232
3322233	tve_exp1911_149	Yukon Canon between Circle City and Eagle	Alaska	Interior				1911	USGS Charley R				Film Negative	https://digital.library.cornell.edu/catalog/ss:3322233
3322234	tve_exp1911_150	Yukon Canon between Circle City and Eagle	Alaska	Interior				1911	USGS Charley R				Film Negative	https://digital.library.cornell.edu/catalog/ss:3322234
3322235	tve_exp1911_151	Steward on St. Michael	Alaska	Interior				1911					Film Negative	https://digital.library.cornell.edu/catalog/ss:3322235
3322236	tve_exp1911_152	Yukon between Circle City and Eagle	Alaska	Interior				1911	USGS Charley R				Film Negative	https://digital.library.cornell.edu/catalog/ss:3322236
3322237	tve_exp1911_153	Yukon between Circle City and Eagle	Alaska	Interior				1911	USGS Charley R				Film Negative	https://digital.library.cornell.edu/catalog/ss:3322237
3322238	tve_exp1911_154	Yukon between Circle City and Eagle	Alaska	Interior				1911	USGS Charley R				Film Negative	https://digital.library.cornell.edu/catalog/ss:3322238
3322239	tve_exp1911_155	Calico Bluff, Yukon River	Alaska	Interior				1911	USGS Eagle (D1)	-141.192	64.9101		Film Negative	https://digital.library.cornell.edu/catalog/ss:3322239
3322240	tve_exp1911_156	Eagle on Yukon River	Alaska	Interior				1911	USGS Eagle (D1)	-141.2	64.7876		Film Negative	https://digital.library.cornell.edu/catalog/ss:3322240
3322241	tve_exp1911_157	Yukon River from Eagle	Alaska	Interior				1911	USGS Eagle (D1)	-141.2	64.7876		Film Negative	https://digital.library.cornell.edu/catalog/ss:3322241
3322242	tve_exp1911_158	Bluff, Yukon River	Alaska	Interior				1911					Film Negative	https://digital.library.cornell.edu/catalog/ss:3322242
3322243	tve_exp1911_159	Governor's house - Dawson, Yt	Canada	Yukon				1911	NRC 116B03	-139.437	64.0574		Film Negative	https://digital.library.cornell.edu/catalog/ss:3322243
3322244	tve_exp1911_160	Governor's garden - Dawson Yt	Canada	Yukon				1911	NRC 116B03	-139.437	64.0574		Film Negative	https://digital.library.cornell.edu/catalog/ss:3322244
3322245	tve_exp1911_161	Cauliflower - Governor's Garden - Dawson Yt	Canada	Yukon				1911	NRC 116B03	-139.437	64.0574		Film Negative	https://digital.library.cornell.edu/catalog/ss:3322245
3322246	tve_exp1911_162	Front yard - Governor's house - Dawson	Canada	Yukon				1911	NRC 116B03	-139.437	64.0574		Film Negative	https://digital.library.cornell.edu/catalog/ss:3322246
3322247	tve_exp1911_163	Garden in Park - Dawson	Canada	Yukon				1911	NRC 116B03	-139.437	64.0574		Film Negative	https://digital.library.cornell.edu/catalog/ss:3322247
3322248	tve_exp1911_164	Park - Dawson	Canada	Yukon				1911	NRC 116B03	-139.437	64.0574		Film Negative	https://digital.library.cornell.edu/catalog/ss:3322248
3322249	tve_exp1911_165	Outwash from hydraulic mining	Canada	Yukon				1911					Film Negative	https://digital.library.cornell.edu/catalog/ss:3322249
3322250	tve_exp1911_166	Outwash of placer hydraulic mining	Canada	Yukon				1911					Film Negative	https://digital.library.cornell.edu/catalog/ss:3322250
3322251	tve_exp1911_167	Looking up valley of Bonanza Creek	Canada	Yukon				1911	NRC 115O14	-139.32	63.8996		Film Negative	https://digital.library.cornell.edu/catalog/ss:3322251
3322252	tve_exp1911_168	Looking down Bonanza Creek	Alaska	Yukon				1911	NRC 115O14	-139.32	63.8996		Film Negative	https://digital.library.cornell.edu/catalog/ss:3322252
3322253	tve_exp1911_169	Dam to hold in hydraulic wash - Bonanza Creek	Canada	Yukon				1911	NRC 115O14	-139.32	63.8996		Film Negative	https://digital.library.cornell.edu/catalog/ss:3322253
3322254	tve_exp1911_170	Steel dredge under construction. Grand Forks, Bonanza Creek.	Canada	Yukon				1911	NRC 115O14	-139.32	63.8996		Film Negative	https://digital.library.cornell.edu/catalog/ss:3322254
3322255	tve_exp1911_171	Hydraulic works Cheechacs [Cheechako] Hill	Canada	Yukon				1911	NRC 115O14	-139.332	63.9349		Film Negative	https://digital.library.cornell.edu/catalog/ss:3322255
3322256	tve_exp1911_172	Upper bench, Cheechacs [Cheechako] Hills, Bonanza Creek, Dawson District	Canada	Yukon				1911	NRC 115O14	-139.332	63.9349		Film Negative	https://digital.library.cornell.edu/catalog/ss:3322256
3322257	tve_exp1911_173	Volcanic ash on gravels, Lewes River	Canada	Yukon				1911		-134.794	60.6144	Lewes River is former name for Upper Yukon	Film Negative	https://digital.library.cornell.edu/catalog/ss:3322257
3322258	tve_exp1911_174	River bank above Dawson	Canada	Yukon				1911	NRC 116B03	-139.437	64.0574		Film Negative	https://digital.library.cornell.edu/catalog/ss:3322258
3322259	tve_exp1911_175	Volcanic ash on gravels, Lewes River	Canada	Yukon				1911		-134.794	60.6144	Lewes River is former name for Upper Yukon	Film Negative	https://digital.library.cornell.edu/catalog/ss:3322259
3322260	tve_exp1911_176	Five Finger Rapids	Canada	Yukon				1911	NRC 115I08	-136.354	62.2702		Film Negative	https://digital.library.cornell.edu/catalog/ss:3322260
3322261	tve_exp1911_177	Five Finger Rapids	Canada	Yukon				1911	NRC 115I08	-136.354	62.2702		Film Negative	https://digital.library.cornell.edu/catalog/ss:3322261
3322262	tve_exp1911_178	Sculpturing of cliff - Bank Lewes River	Canada	Yukon				1911		-134.794	60.6144	Lewes River is former name for Upper Yukon	Film Negative	https://digital.library.cornell.edu/catalog/ss:3322262
3322263	tve_exp1911_179	Children on steamer above Dawson	Canada	Yukon				1911	NRC 116B03	-139.437	64.0574		Film Negative	https://digital.library.cornell.edu/catalog/ss:3322263
3322264	tve_exp1911_180	Mountains on Lewes River near Lake Labarge	Canada	Yukon				1911	NRC 105D14	-135.106	61.0537		Film Negative	https://digital.library.cornell.edu/catalog/ss:3322264
3322265	tve_exp1911_181	View from Carcross Yt.	Canada	Yukon				1911	NRC 105D02	-134.707	60.1679		Film Negative	https://digital.library.cornell.edu/catalog/ss:3322265
3322266	tve_exp1911_182	Copper River railway train	Alaska	Wrangell Mountains				1911					Film Negative	https://digital.library.cornell.edu/catalog/ss:3322266
3322267	tve_exp1911_183	Pool on Kennicott Glacier	Alaska	Wrangell Mountains	Kennicott Glacier			1911	USGS McCarthy (B6, C6)	-143.04	61.6167		Film Negative	https://digital.library.cornell.edu/catalog/ss:3322267
3322268	tve_exp1911_184	Granular surface, Kennicott Glacier	Alaska	Wrangell Mountains	Kennicott Glacier			1911	USGS McCarthy (B6, C6)	-143.04	61.6167		Film Negative	https://digital.library.cornell.edu/catalog/ss:3322268
3322269	tve_exp1911_185	Surface of rock glacier, Jumbo Mine	Alaska	Wrangell Mountains				1911	USGS McCarthy (C5)	-142.851	61.5227		Film Negative	https://digital.library.cornell.edu/catalog/ss:3322269
3322270	tve_exp1911_186	Surface of rock glacier, Jumbo Mine	Alaska	Wrangell Mountains				1911	USGS McCarthy (C5)	-142.851	61.5227		Film Negative	https://digital.library.cornell.edu/catalog/ss:3322270
3322271	tve_exp1911_187	Taku Glacier	Alaska	Juneau	Taku Glacier			1911	USGS Juneau (B1)	-134.072	58.4441		Film Negative	https://digital.library.cornell.edu/catalog/ss:3322271
3322272	tve_exp1911_188	Front of Norris Glacier	Alaska	Juneau	Norris Glacier			1911	USGS Juneau (B1)	-134.172	58.4301		Film Negative	https://digital.library.cornell.edu/catalog/ss:3322272
3322273	tve_exp1911_189	East Glacier Stream of Norris Glacier	Alaska	Juneau	Norris Glacier			1911	USGS Juneau (B1)	-134.172	58.4301		Film Negative	https://digital.library.cornell.edu/catalog/ss:3322273
3322274	tve_exp1911_190	Taku Glacier from rock ledge	Alaska	Juneau	Taku Glacier			1911	USGS Juneau (B1)	-134.072	58.4441		Film Negative	https://digital.library.cornell.edu/catalog/ss:3322274
3322275	tve_exp1911_191	Mountain from trail to Bonanza Mine	Alaska	Wrangell Mountains				1911	USGS McCarthy (B6)				Film Negative	https://digital.library.cornell.edu/catalog/ss:3322275
3322276	tve_exp1911_192	Kennicott glacier from mountain side above Mine Camp	Alaska	Wrangell Mountains	Kennicott Glacier			1911	USGS McCarthy (B6, C6)				Film Negative	https://digital.library.cornell.edu/catalog/ss:3322276
3322277	tve_exp1911_193	Kennicott Glacier from east side mountain	Alaska	Wrangell Mountains	Kennicott Glacier			1911	USGS McCarthy (B6, C6)				Film Negative	https://digital.library.cornell.edu/catalog/ss:3322277
3322278	tve_exp1911_194	Kennicott Glacier from east side mountain	Alaska	Wrangell Mountains	Kennicott Glacier			1911	USGS McCarthy (B6, C6)				Film Negative	https://digital.library.cornell.edu/catalog/ss:3322278
3322279	tve_exp1911_195	Kennicott Glacier - east side	Alaska	Wrangell Mountains	Kennicott Glacier			1911	USGS McCarthy (B6, C6)				Film Negative	https://digital.library.cornell.edu/catalog/ss:3322279
3322280	tve_exp1911_196	Eastern margin of Kennicott Glacier	Alaska	Wrangell Mountains	Kennicott Glacier			1911	USGS McCarthy (B6, C6)				Film Negative	https://digital.library.cornell.edu/catalog/ss:3322280
3322281	tve_exp1911_197	Surface of Kennicott Glacier	Alaska	Wrangell Mountains	Kennicott Glacier			1911	USGS McCarthy (B6, C6)				Film Negative	https://digital.library.cornell.edu/catalog/ss:3322281
3322282	tve_exp1911_198	From mountain slope below Bonanza Mine	Alaska	Wrangell Mountains				1911	USGS McCarthy (B6)	-142.833	61.5138		Film Negative	https://digital.library.cornell.edu/catalog/ss:3322282
3322283	tve_exp1911_199	Mountain near Jumbo Mine	Alaska	Wrangell Mountains				1911	USGS McCarthy (C5)	-142.851	61.5227		Film Negative	https://digital.library.cornell.edu/catalog/ss:3322283
3322284	tve_exp1911_200	Mountains at Jumbo Mine	Alaska	Wrangell Mountains				1911	USGS McCarthy (C5)	-142.851	61.5227		Film Negative	https://digital.library.cornell.edu/catalog/ss:3322284
3322285	tve_exp1911_201	Eastern margin Kennicot Glacier at mine camp	Alaska	Wrangell Mountains	Kennicott Glacier			1911	NRC 104N	-143.04	61.6167		Film Negative	https://digital.library.cornell.edu/catalog/ss:3322285
3322286	tve_exp1911_202	View looking west over Lake Atlin	Canada	British Columbia				1911	NRC 104N	-133.723	59.576		Film Negative	https://digital.library.cornell.edu/catalog/ss:3322286
3322287	tve_exp1911_203	Gorge above Atlin	Canada	British Columbia				1911	NRC 104N	-133.723	59.576		Film Negative	https://digital.library.cornell.edu/catalog/ss:3322287
3322288	tve_exp1911_204	Older gravel, till and younger gravel. Pine City	Canada	British Columbia				1911	NRC 104N12	-133.55 59.	6		Film Negative	https://digital.library.cornell.edu/catalog/ss:3322288
3322289	tve_exp1911_205	Crossing the bridges - Pine City	Canada	British Columbia				1911	NRC 104N12	-133.55 59.	6		Film Negative	https://digital.library.cornell.edu/catalog/ss:3322289
3322290	tve_exp1911_206	Lake Atlin looking southward	Canada	British Columbia				1911	NRC 104N	-133.723	59.576		Film Negative	https://digital.library.cornell.edu/catalog/ss:3322290
3322291	tve_exp1911_207	Taku Arm	Canada	British Columbia				1911	NRC 104M16	-134.054	58.3076		Film Negative	https://digital.library.cornell.edu/catalog/ss:3322291
3322292	tve_exp1911_208	Carcross from lake	Canada	Yukon				1911	NRC 105D02	-134.707	60.1679		Film Negative	https://digital.library.cornell.edu/catalog/ss:3322292
3322293	tve_exp1911_209	Lake Bennett - White Pass	Canada	British Columbia				1911	NRC 105D02/104M15	-134.877	60.0848		Film Negative	https://digital.library.cornell.edu/catalog/ss:3322293
3322294	tve_exp1911_210	Looking down Lake Bennett	Canada	British Columbia				1911	NRC 105D02/104M15	-134.877	60.0848		Film Negative	https://digital.library.cornell.edu/catalog/ss:3322294
3322295	tve_exp1911_211	Looking toward Lake Bennett	Canada	British Columbia				1911	NRC 105D02/104M15	-134.877	60.0848		Film Negative	https://digital.library.cornell.edu/catalog/ss:3322295
3322296	tve_exp1911_212	View above White Pass	Canada	British Columbia				1911	NRC 104M11	-135.139	59.6251		Film Negative	https://digital.library.cornell.edu/catalog/ss:3322296
3322297	tve_exp1911_213	View from White Pass Railroad	Canada	British Columbia				1911					Film Negative	https://digital.library.cornell.edu/catalog/ss:3322297
3322298	tve_exp1911_214	At White Pass	Canada	British Columbia				1911	NRC 104M11	-135.139	59.6251		Film Negative	https://digital.library.cornell.edu/catalog/ss:3322298
3322299	tve_exp1911_215	View from White Pass Railroad	Canada	British Columbia				1911					Film Negative	https://digital.library.cornell.edu/catalog/ss:3322299
3322300	tve_exp1911_216	View from White Pass Railroad	Canada	British Columbia				1911					Film Negative	https://digital.library.cornell.edu/catalog/ss:3322300
3322301	tve_exp1911_217	Looking up White Pass	Canada	British Columbia				1911	NRC 104M11	-135.139	59.6251		Film Negative	https://digital.library.cornell.edu/catalog/ss:3322301
3322302	tve_exp1911_218	Glacier from Skagway	Alaska	Southern Panhandle				1911	USGS Skagway (B1)	-135.327	59.4564		Film Negative	https://digital.library.cornell.edu/catalog/ss:3322302
3322303	tve_exp1911_219	Skagway from pier	Alaska	Southern Panhandle				1911	USGS Skagway (B1)	-135.327	59.4564		Film Negative	https://digital.library.cornell.edu/catalog/ss:3322303
3322304	tve_exp1911_220	Lynn Canal - Alaska	Alaska	Southern Panhandle				1911	USGS Skagway (A1), Juneau (D4)	-135.151	58.8161		Film Negative	https://digital.library.cornell.edu/catalog/ss:3322304
3322305	tve_exp1911_221	Lynn Canal - Alaska	Alaska	Southern Panhandle				1911	USGS Skagway (A1), Juneau (D4)	-135.151	58.8161		Film Negative	https://digital.library.cornell.edu/catalog/ss:3322305
3322306	tve_exp1911_222	Lynn Canal - Hanging Valley	Alaska	Southern Panhandle				1911	USGS Skagway (A1), Juneau (D4)	-135.151	58.8161		Film Negative	https://digital.library.cornell.edu/catalog/ss:3322306
3322307	tve_exp1911_223	Lynn Canal - Hanging Valley	Alaska	Southern Panhandle				1911	USGS Skagway (A1), Juneau (D4)	-135.151	58.8161		Film Negative	https://digital.library.cornell.edu/catalog/ss:3322307
3322308	tve_exp1911_224	Glaciers east side, Lynn Canal	Alaska	Southern Panhandle				1911	USGS Skagway (A1), Juneau (D4)	-135.151	58.8161		Film Negative	https://digital.library.cornell.edu/catalog/ss:3322308
3322309	tve_exp1911_225	Glaciers east side, Lynn Canal	Alaska	Southern Panhandle				1911	USGS Skagway (A1), Juneau (D4)	-135.151	58.8161		Film Negative	https://digital.library.cornell.edu/catalog/ss:3322309
3322310	tve_exp1911_226	Glaciers east side, upper part Lynn Canal	Alaska	Southern Panhandle				1911	USGS Skagway (A1), Juneau (D4)	-135.151	58.8161		Film Negative	https://digital.library.cornell.edu/catalog/ss:3322310
3322311	tve_exp1911_227	Killisnoo	Alaska	Southern Panhandle				1911					Film Negative	https://digital.library.cornell.edu/catalog/ss:3322311
3322312	tve_exp1911_228	Peril Strait	Alaska	Southern Panhandle				1911	USGS Sitka (C4, C5)	-135.271	57.5343		Film Negative	https://digital.library.cornell.edu/catalog/ss:3322312
3322313	tve_exp1911_229	In Peril Strait	Alaska	Southern Panhandle				1911	USGS Sitka (C4, C5)	-135.271	57.5343		Film Negative	https://digital.library.cornell.edu/catalog/ss:3322313
3322314	tve_exp1911_230	In Peril Strait	Alaska	Southern Panhandle				1911	USGS Sitka (C4, C5)	-135.271	57.5343		Film Negative	https://digital.library.cornell.edu/catalog/ss:3322314
3322315	tve_exp1911_231	Salmon cannery (Klinket)	Alaska	Southern Panhandle				1911					Film Negative	https://digital.library.cornell.edu/catalog/ss:3322315
3322316	tve_exp1911_232	Herbert Glacier	Alaska	Juneau	Herbert Glacier			1911	USGS Juneau (C2, C3)	-134.615	58.5637		Film Negative	https://digital.library.cornell.edu/catalog/ss:3322316
3322317	tve_exp1911_233	Mendenhall Glacier	Alaska	Juneau	Mendenhall Glacier			1911	USGS Juneau (B2)	-134.533	58.4841		Film Negative	https://digital.library.cornell.edu/catalog/ss:3322317
3322318	tve_exp1911_234	Icebergs Glacier Bay - Fairweather in distance	Alaska	Glacier Bay				1911	USGS Mount Fairweather				Film Negative	https://digital.library.cornell.edu/catalog/ss:3322318
3322319	tve_exp1911_235	Icebergs - Glacier Bay	Alaska	Glacier Bay				1911	USGS Mount Fairweather				Film Negative	https://digital.library.cornell.edu/catalog/ss:3322319
3322320	tve_exp1911_236	Fairweather mountains from bay	Alaska	Glacier Bay				1911	USGS Mount Fairweather (D5)				Film Negative	https://digital.library.cornell.edu/catalog/ss:3322320
3322321	tve_exp1911_237	Muir Glacier from near North Marble Island	Alaska	Glacier Bay	Muir Glacier			1911	USGS Skagway (A3, A4)	-136.376	59.1178		Film Negative	https://digital.library.cornell.edu/catalog/ss:3322321
3322322	tve_exp1911_238	Mount Wright	Alaska	Glacier Bay				1911	USGS Skagway (A4)	-136.027	58.7973		Film Negative	https://digital.library.cornell.edu/catalog/ss:3322322
3322323	tve_exp1911_239	Looking down Glacier Bay from top Nunatak	Alaska	Glacier Bay				1911	USGS Mount Fairweather	-136.09	58.6705		Film Negative	https://digital.library.cornell.edu/catalog/ss:3322323
3322324	tve_exp1911_240	Plucking Nunatak and Muir Glacier	Alaska	Glacier Bay	Muir Glacier			1911	USGS Skagway (A3, A4)	-136.088	58.8708		Film Negative	https://digital.library.cornell.edu/catalog/ss:3322324
3322325	tve_exp1911_241	Crevasses in Muir Glacier east margin	Alaska	Glacier Bay	Muir Glacier			1911	USGS Skagway (A3, A4)	-136.376	59.1178		Film Negative	https://digital.library.cornell.edu/catalog/ss:3322325
3322326	tve_exp1911_242	Muir Inlet - Glacier in background	Alaska	Glacier Bay	Muir Glacier			1911	USGS Skagway (A4)	-136.088	58.8708		Film Negative	https://digital.library.cornell.edu/catalog/ss:3322326
3322327	tve_exp1911_243	Muir Glacier off north end Nunatak	Alaska	Glacier Bay	Muir Glacier			1911	USGS Skagway (A4)	-136.376	59.1178		Film Negative	https://digital.library.cornell.edu/catalog/ss:3322327
3322328	tve_exp1911_244	Sculptured gravel cliff - McBrides Terminus - Muir Glacier	Alaska	Glacier Bay	McBride Glacier, Muir Glacier			1911	USGS Skagway (A3, A4)	-136.376	59.1178		Film Negative	https://digital.library.cornell.edu/catalog/ss:3322328
3322329	tve_exp1911_245	Surface of rock glacier, Jumbo Mine	Alaska	Wrangell Mountains				1911	USGS McCarthy (C5)	-142.851	61.5227		Film Negative	https://digital.library.cornell.edu/catalog/ss:3322329
3322330	tve_exp1911_246	Crevassed surface, eastern margin, Muir Glacier	Alaska	Glacier Bay	Muir Glacier			1911	USGS Skagway (A3, A4)	-136.376	59.1178		Film Negative	https://digital.library.cornell.edu/catalog/ss:3322330
3322331	tve_exp1911_247	Dirt Glacier from boat Aug 31	Alaska			31	August	1911					Film Negative	https://digital.library.cornell.edu/catalog/ss:3322331
3322332	tve_exp1911_248	Muir Glacier from boat	Alaska	Glacier Bay	Muir Glacier			1911	USGS Skagway (A3, A4)	-136.376	59.1178		Film Negative	https://digital.library.cornell.edu/catalog/ss:3322332
3322334	tve_exp1911_250	Rock wall contact - west side inlet - opposite Rendu Glacier	Alaska	Glacier Bay	Rendu Glacier			1911	USGS Mount Fairweather (D3)	-136.76	59.0502		Film Negative	https://digital.library.cornell.edu/catalog/ss:3322334
3322335	tve_exp1911_251	Iceberg - Muir Inlet	Alaska	Glacier Bay	Muir Glacier			1911	USGS Skagway (A4)	-136.088	58.8708		Film Negative	https://digital.library.cornell.edu/catalog/ss:3322335
3322336	tve_exp1911_252	Iceberg gain opposite Rendu Inlet	Alaska	Glacier Bay				1911		-136.661	58.9618		Film Negative	https://digital.library.cornell.edu/catalog/ss:3322336
3322337	tve_exp1911_253	Hugh Miller Glacier from Rendu Inlet	Alaska	Glacier Bay	Hugh Miller Glacier			1911	USGS Mount Fairweather (C3)	-136.672	58.7209		Film Negative	https://digital.library.cornell.edu/catalog/ss:3322337
3322338	tve_exp1911_254	Panorama Rendu Glacier from Cairn	Alaska	Glacier Bay	Rendu Glacier			1911	USGS Skagway (A5)	-136.76	59.0502		Film Negative	https://digital.library.cornell.edu/catalog/ss:3322338
3322339	tve_exp1911_255	Rendu Glacier	Alaska	Glacier Bay	Rendu Glacier			1911	USGS Skagway (A5)	-136.76	59.0502		Film Negative	https://digital.library.cornell.edu/catalog/ss:3322339
3322340	tve_exp1911_256	Rendu Glacier from east shore	Alaska	Glacier Bay	Rendu Glacier			1911	USGS Skagway (A5)	-136.76	59.0502		Film Negative	https://digital.library.cornell.edu/catalog/ss:3322340
3322341	tve_exp1911_257	Eastern edge Rendu Glacier	Alaska	Glacier Bay	Rendu Glacier			1911	USGS Skagway (A5)	-136.76	59.0502		Film Negative	https://digital.library.cornell.edu/catalog/ss:3322341
3322342	tve_exp1911_258	West wing, Rendu Glacier, east side	Alaska	Glacier Bay	Rendu Glacier			1911	USGS Skagway (A5)	-136.76	59.0502		Film Negative	https://digital.library.cornell.edu/catalog/ss:3322342
3322343	tve_exp1911_259	The Marble Knob shots - graph site viewed from east side, near Rendu	Alaska	Glacier Bay				1911	USGS Mount Fairweather (D3)	-136.76	59.0502		Film Negative	https://digital.library.cornell.edu/catalog/ss:3322343
3322344	tve_exp1911_260	Rendu Glacier from fiord	Alaska	Glacier Bay	Rendu Glacier			1911	USGS Skagway (A5)	-136.76	59.0502		Film Negative	https://digital.library.cornell.edu/catalog/ss:3322344
3322345	tve_exp1911_261	Hugh Miller Glacier from east	Alaska	Glacier Bay	Hugh Miller Glacier			1911	USGS Mount Fairweather (C3)	-136.672	58.7209		Film Negative	https://digital.library.cornell.edu/catalog/ss:3322345
3322346	tve_exp1911_262	Carroll Glacier from fiord	Alaska	Glacier Bay	Carroll Glacier			1911	USGS Skagway (A4, A5)	-136.559	59.0431		Film Negative	https://digital.library.cornell.edu/catalog/ss:3322346
3322347	tve_exp1911_263	Carroll Glacier from Triangle Island	Alaska	Glacier Bay	Carroll Glacier			1911	USGS Skagway (A4, A5)	-136.559	59.0431		Film Negative	https://digital.library.cornell.edu/catalog/ss:3322347
3322348	tve_exp1911_264	Carroll Glacier from above Alluvial Fan	Alaska	Glacier Bay	Carroll Glacier			1911	USGS Skagway (A4, A5)	-136.559	59.0431		Film Negative	https://digital.library.cornell.edu/catalog/ss:3322348
3322349	tve_exp1911_265	Hanging Valley, where in 1892 glacier came from north to the end of Grand Pacific Glacier	Alaska	Glacier Bay				1911	USGS Skagway (A6)				Film Negative	https://digital.library.cornell.edu/catalog/ss:3322349
3322350	tve_exp1911_266	Grand Pacific Glacier, E side Inlet, Above Russell Island	Alaska	Glacier Bay	Grand Pacific Glacier			1911	USGS Skagway (A6)	-137.075	59.0799		Film Negative	https://digital.library.cornell.edu/catalog/ss:3322350
3322351	tve_exp1911_267	Grand Pacific Glacier, east side inlet, above Russel Island	Alaska	Glacier Bay	Grand Pacific Glacier			1911	USGS Skagway (A6)	-137.075	59.0799		Film Negative	https://digital.library.cornell.edu/catalog/ss:3322351
3322352	tve_exp1911_268	Glacier, Johns Hopkins Bay, Grand Pacific Inlet, east side, above Russel Islands	Alaska	Glacier Bay				1911	USGS Mount Fairweather (D4)	-137.055	58.8816		Film Negative	https://digital.library.cornell.edu/catalog/ss:3322352
3322353	tve_exp1911_269	Fairweather range, looking towards Johns Hopkins Glacier	Alaska	Glacier Bay	Johns Hopkins Glacier			1911	USGS Mount Fairweather (D4)	-137.139	58.8244		Film Negative	https://digital.library.cornell.edu/catalog/ss:3322353
3322354	tve_exp1911_270	Reid Glacier, South Side Russell Island	Alaska	Glacier Bay	Reid Glacier			1911	USGS Mount Fairweather (D3)	-136.801	58.8031		Film Negative	https://digital.library.cornell.edu/catalog/ss:3322354
3322355	tve_exp1911_271	Reid Glacier from new Cairn site, south end Russell Island	Alaska	Glacier Bay	Reid Glacier			1911	USGS Mount Fairweather (D3)	-136.801	58.8031		Film Negative	https://digital.library.cornell.edu/catalog/ss:3322355
3322356	tve_exp1911_272	Johns Hopkins Glacier, from new Cairn site, south end Russell Island	Alaska	Glacier Bay	Johns Hopkins Glacier			1911	USGS Mount Fairweather (D4)	-137.139	58.8244		Film Negative	https://digital.library.cornell.edu/catalog/ss:3322356
3322357	tve_exp1911_273	Johns Hopkins, south end Russell Island	Alaska	Glacier Bay	Johns Hopkins Glacier			1911	USGS Mount Fairweather (D4)	-137.139	58.8244		Film Negative	https://digital.library.cornell.edu/catalog/ss:3322357
3322358	tve_exp1911_274	Panorama Favorite and Charpentier Glaciers on Knob west side valley	Alaska	Glacier Bay	Favorite Glacier, Charpentier Glacier			1911	USGS Mount Fairweather (C2)	-136.589	58.6658		Film Negative	https://digital.library.cornell.edu/catalog/ss:3322358
3322359	tve_exp1911_275	Panorama Favorite and Charpentier Glaciers on Knob west side valley	Alaska	Glacier Bay	Favorite Glacier, Charpentier Glacier			1911	USGS Mount Fairweather (C2)	-136.589	58.6658		Film Negative	https://digital.library.cornell.edu/catalog/ss:3322359
3322360	tve_exp1911_276	Panorama Favorite and Charpentier Glaciers on Knob west side valley	Alaska	Glacier Bay	Favorite Glacier, Charpentier Glacier			1911	USGS Mount Fairweather (C2)	-136.589	58.6658		Film Negative	https://digital.library.cornell.edu/catalog/ss:3322360
3322361	tve_exp1911_277	Martin photographing	Alaska	Glacier Bay				1911					Film Negative	https://digital.library.cornell.edu/catalog/ss:3322361
3322362	tve_exp1911_278	Charpentier Glacier from Reid site	Alaska	Glacier Bay	Charpentier Glacier			1911	USGS Mount Fairweather (C2)	-136.589	58.6658		Film Negative	https://digital.library.cornell.edu/catalog/ss:3322362
3322363	tve_exp1911_279	Charpentier Glacier from Reid site (eg)	Alaska	Glacier Bay	Charpentier Glacier			1911	USGS Mount Fairweather (C2)	-136.589	58.6658		Film Negative	https://digital.library.cornell.edu/catalog/ss:3322363
3322364	tve_exp1911_280	Charpentier Glacier from Reid site (eg) Great Retreat	Alaska	Glacier Bay	Charpentier Glacier			1911	USGS Mount Fairweather (C2)	-136.589	58.6658		Film Negative	https://digital.library.cornell.edu/catalog/ss:3322364
3322365	tve_exp1911_281	Hugh Miller Glacier from Reid's site	Alaska	Glacier Bay	Hugh Miller Glacier			1911	USGS Mount Fairweather (C3)	-136.672	58.7209		Film Negative	https://digital.library.cornell.edu/catalog/ss:3322365
3322366	tve_exp1911_282	Panorama of Hugh Miller Glacier from Gilbert's site on island	Alaska	Glacier Bay	Hugh Miller Glacier			1911	USGS Mount Fairweather (C3)	-136.672	58.7209		Film Negative	https://digital.library.cornell.edu/catalog/ss:3322366
3322367	tve_exp1911_283	Panorama of Hugh Miller Glacier from Gilbert site	Alaska	Glacier Bay	Hugh Miller Glacier			1911	USGS Mount Fairweather (C3)	-136.672	58.7209		Film Negative	https://digital.library.cornell.edu/catalog/ss:3322367
3322368	tve_exp1911_284	Panorama of Hugh Miller, Glacier from Gilbert site	Alaska	Glacier Bay	Hugh Miller Glacier			1911	USGS Mount Fairweather (C3)	-136.672	58.7209		Film Negative	https://digital.library.cornell.edu/catalog/ss:3322368
3322369	tve_exp1911_285	Panorama of Hugh Miller, Glacier from Gilbert site	Alaska	Glacier Bay	Hugh Miller Glacier			1911	USGS Mount Fairweather (C3)	-136.672	58.7209		Film Negative	https://digital.library.cornell.edu/catalog/ss:3322369
3322370	tve_exp1911_286	Panorama of Hugh Miller Glacier from Gilbert's site on island	Alaska	Glacier Bay	Hugh Miller Glacier			1911	USGS Mount Fairweather (C3)	-136.672	58.7209		Film Negative	https://digital.library.cornell.edu/catalog/ss:3322370
3322371	tve_exp1911_287	Remnant of ice, former tributary to Charpentier (1892)	Alaska	Glacier Bay				1911	USGS Mount Fairweather (C2)				Film Negative	https://digital.library.cornell.edu/catalog/ss:3322371
3322372	tve_exp1911_288	Wood Glacier from Reid's site	Alaska	Glacier Bay	Wood Glacier			1911	USGS Mount Fairweather (C2)	-136.442	58.5479		Film Negative	https://digital.library.cornell.edu/catalog/ss:3322372
3322373	tve_exp1911_289	Geikie Glacier from Reid's 1892 site	Alaska	Glacier Bay	Geikie Glacier			1911	USGS Mount Fairweather (C2)	-136.611	58.5826		Film Negative	https://digital.library.cornell.edu/catalog/ss:3322373
3322374	tve_exp1911_290	Panorama Geikie Glacier from new site in front Wright site, etc.	Alaska	Glacier Bay	Geikie Glacier			1911	USGS Mount Fairweather (C2)	-136.611	58.5826		Film Negative	https://digital.library.cornell.edu/catalog/ss:3322374
3322375	tve_exp1911_291	Iceberg, Glacier Bay	Alaska	Glacier Bay				1911	USGS Mount Fairweather (D5)	-136.09	58.6705		Film Negative	https://digital.library.cornell.edu/catalog/ss:3322375
3322376	tve_exp1911_292	Icebergs, Glacier Bay	Alaska	Glacier Bay				1911	USGS Mount Fairweather (D5)	-136.09	58.6705		Film Negative	https://digital.library.cornell.edu/catalog/ss:3322376
3322377	tve_exp1911_293	Icebergs - Glacier Bay	Alaska	Glacier Bay				1911	USGS Mount Fairweather (D5)	-136.09	58.6705		Film Negative	https://digital.library.cornell.edu/catalog/ss:3322377
3322378	tve_exp1911_294	Icebergs, Glacier Bay	Alaska	Glacier Bay				1911	USGS Mount Fairweather (D5)	-136.09	58.6705		Film Negative	https://digital.library.cornell.edu/catalog/ss:3322378
3322379	tve_exp1911_295	Hanging Valley Lip Inside Passage	Alaska	Southern Panhandle				1911					Film Negative	https://digital.library.cornell.edu/catalog/ss:3322379
3322380	tve_exp1911_296	Truncated Spurs- Inside Passage	Alaska	Southern Panhandle				1911					Film Negative	https://digital.library.cornell.edu/catalog/ss:3322380
3322381	tve_exp1911_297	Truncated Spurs- Inside Passage	Alaska	Southern Panhandle				1911					Film Negative	https://digital.library.cornell.edu/catalog/ss:3322381
3322382	tve_exp1911_298	Waterfall out of Hanging Valley. Inside Passage.	Alaska	Southern Panhandle				1911					Film Negative	https://digital.library.cornell.edu/catalog/ss:3322382
3322383	tve_exp1911_299	Hanging Valley. Inside Passage	Alaska	Southern Panhandle				1911					Film Negative	https://digital.library.cornell.edu/catalog/ss:3322383
3322384	tve_exp1911_300	Truncated Spurs- Inside Passage	Alaska	Southern Panhandle				1911					Film Negative	https://digital.library.cornell.edu/catalog/ss:3322384
3322385	tve_exp1911_301	Steepened Slope and Truncated Spur- Inside Passage.	Alaska	Southern Panhandle				1911					Film Negative	https://digital.library.cornell.edu/catalog/ss:3322385
3322386	tve_exp1911_302	Hanging Valley, lip and waterfall. Inside Passage.	Alaska	Southern Panhandle				1911					Film Negative	https://digital.library.cornell.edu/catalog/ss:3322386
3322387	tve_exp1911_303	Hanging Valley. Inside Passage	Alaska	Southern Panhandle				1911					Film Negative	https://digital.library.cornell.edu/catalog/ss:3322387
3322388	tve_exp1911_304	Hanging Valley. Inside Passage	Alaska	Southern Panhandle				1911				Straus 3/25-29	Film Negative	https://digital.library.cornell.edu/catalog/ss:3322388
3322390	tve_exp1911_306	Hanging Valley. Inside Passage	Alaska	Southern Panhandle				1911					Film Negative	https://digital.library.cornell.edu/catalog/ss:3322390
3322391	tve_exp1911_307	Hanging Valley. Inside Passage	Alaska	Southern Panhandle				1911					Film Negative	https://digital.library.cornell.edu/catalog/ss:3322391
3322392	tve_exp1911_308	Fiord and Truncated Spurs. Inside Passage.	Alaska	Southern Panhandle				1911					Film Negative	https://digital.library.cornell.edu/catalog/ss:3322392
3322393	tve_exp1911_309	Wreck of Colorado. Wrangell Narrows.	Alaska	Southern Panhandle				1911	USGS Petersburg (D3)	-132.929	56.6565		Film Negative	https://digital.library.cornell.edu/catalog/ss:3322393
3322394	tve_exp1911_310	Wrangell Narrows	Alaska	Southern Panhandle				1911	USGS Petersburg (D3)	-132.929	56.6565	Straus 3/25-29	Film Negative	https://digital.library.cornell.edu/catalog/ss:3322394
3322395	tve_exp1911_311	Wrangell Narrows	Alaska	Southern Panhandle				1911	USGS Petersburg (D3)	-132.929	56.6565		Film Negative	https://digital.library.cornell.edu/catalog/ss:3322395
3322396	tve_exp1911_312	Wrangell Narrows	Alaska	Southern Panhandle				1911	USGS Petersburg (D3)	-132.929	56.6565		Film Negative	https://digital.library.cornell.edu/catalog/ss:3322396
3322397	tve_exp1911_313	Salmon Cannery. Wrangell Narrows	Alaska	Southern Panhandle				1911	USGS Petersburg (D3)	-132.929	56.6565	Straus 3/25-29	Film Negative	https://digital.library.cornell.edu/catalog/ss:3322397
3322399	tve_exp1911_315	Hanging Valley. Valdez Inlet.	Alaska	Prince William Sound				1911	USGS Valdez (A7)	-146.51	61.1014		Film Negative	https://digital.library.cornell.edu/catalog/ss:3322399
3322400	tve_exp1911_316	Cirque- Port Valdez	Alaska	Prince William Sound				1911	USGS Valdez (A7)	-146.263	61.0944		Film Negative	https://digital.library.cornell.edu/catalog/ss:3322400
3322401	tve_exp1911_317	West Margin of Columbia Glacier	Alaska	Prince William Sound	Columbia Glacier			1911	USGS Seward (D1), Anchorage (A1)	-147.077	61.0958		Film Negative	https://digital.library.cornell.edu/catalog/ss:3322401
3322402	tve_exp1911_318	West Margin of Columbia Glacier	Alaska	Prince William Sound	Columbia Glacier			1911	USGS Seward (D1), Anchorage (A1)	-147.077	61.0958		Film Negative	https://digital.library.cornell.edu/catalog/ss:3322402
3322403	tve_exp1911_319	Waterfall by tunnel from margin of Spencer Glacier	Alaska	Kenai Peninsula	Spencer Glacier			1911	USGS Seward (C6)	-148.976	60.6734		Film Negative	https://digital.library.cornell.edu/catalog/ss:3322403
3322404	tve_exp1911_320	Kenai Lake, Alaska Northern Ry.	Alaska	Kenai Peninsula				1911	USGS Seward (B7, B8)	-149.666	60.4145		Film Negative	https://digital.library.cornell.edu/catalog/ss:3322404
3322405	tve_exp1911_321	View from car on Alaska Northern Ry.	Alaska	Kenai Peninsula				1911					Film Negative	https://digital.library.cornell.edu/catalog/ss:3322405
3322406	tve_exp1911_322	Hanging Valley- Valdez Fiord	Alaska	Prince William Sound				1911	USGS Valdez (A7)	-146.51	61.1014		Film Negative	https://digital.library.cornell.edu/catalog/ss:3322406
3322407	tve_exp1911_323	Plucked face- Spencer Glacier on right	Alaska	Kenai Peninsula	Spencer Glacier			1911	USGS Seward (C6)	-148.976	60.6734		Film Negative	https://digital.library.cornell.edu/catalog/ss:3322407
3322408	tve_exp1911_324	Rounded stone end plucked on opposite side hill east end Spencer Glacier	Alaska	Kenai Peninsula	Spencer Glacier			1911	USGS Seward (C6)	-148.976	60.6734		Film Negative	https://digital.library.cornell.edu/catalog/ss:3322408
3322409	tve_exp1911_325	Plucked surface, Hill east margin Spencer Glacier	Alaska	Kenai Peninsula	Spencer Glacier			1911	USGS Seward (C6)	-148.976	60.6734		Film Negative	https://digital.library.cornell.edu/catalog/ss:3322409
3322410	tve_exp1911_326	Plucked Surface on Hill East Margin Spencer Glacier	Alaska	Kenai Peninsula	Spencer Glacier			1911	USGS Seward (C6)	-148.976	60.6734		Film Negative	https://digital.library.cornell.edu/catalog/ss:3322410
3322411	tve_exp1911_327	Smoothed, striated, and plucked surface. Hill east margin Spencer Glacier	Alaska	Kenai Peninsula	Spencer Glacier			1911	USGS Seward (C6)	-148.976	60.6734		Film Negative	https://digital.library.cornell.edu/catalog/ss:3322411
3322412	tve_exp1911_328	Smoothed + plucked surface, east margin Spencer Glacier	Alaska	Kenai Peninsula	Spencer Glacier			1911	USGS Seward (C6)	-148.976	60.6734		Film Negative	https://digital.library.cornell.edu/catalog/ss:3322412
3322413	tve_exp1911_329	Basin, with terraces Alaska Northern Ry.	Alaska	Kenai Peninsula				1911					Film Negative	https://digital.library.cornell.edu/catalog/ss:3322413
3322414	tve_exp1911_330	Shoup Glacier Hanging Valley- from Fiord	Alaska	Prince William Sound	Shoup Glacier			1911	USGS Valdez (A7)	-146.613	61.1808		Film Negative	https://digital.library.cornell.edu/catalog/ss:3322414
3322415	tve_exp1911_331	Shoup Glacier	Alaska	Prince William Sound	Shoup Glacier			1911	USGS Valdez (A7)	-146.613	61.1808		Film Negative	https://digital.library.cornell.edu/catalog/ss:3322415
3322416	tve_exp1911_332	Hanging Valley- Valdez Fiord	Alaska	Prince William Sound				1911	USGS Valdez (A7)	-146.51	61.1014		Film Negative	https://digital.library.cornell.edu/catalog/ss:3322416
3322417	tve_exp1911_333	Stoss and Lee sides of Plucked Rocks- Mountainous Surface	Alaska	Prince William Sound				1911					Film Negative	https://digital.library.cornell.edu/catalog/ss:3322417
3322418	tve_exp1911_334	Hanging Valley- Valdez Fiord	Alaska	Prince William Sound				1911	USGS Valdez (A7)	-146.51	61.1014		Film Negative	https://digital.library.cornell.edu/catalog/ss:3322418
3322419	tve_exp1911_335	Hanging Valley- Valdez Fiord	Alaska	Prince William Sound				1911	USGS Valdez (A7)	-146.51	61.1014		Film Negative	https://digital.library.cornell.edu/catalog/ss:3322419
3322420	tve_exp1911_336	Hanging Valley- Valdez Fiord	Alaska	Prince William Sound				1911	USGS Valdez (A7)	-146.51	61.1014		Film Negative	https://digital.library.cornell.edu/catalog/ss:3322420
3322421	tve_exp1911_337	Hanging Valley- Valdez Fiord	Alaska	Prince William Sound				1911	USGS Valdez (A7)	-146.51	61.1014		Film Negative	https://digital.library.cornell.edu/catalog/ss:3322421
3322422	tve_exp1911_338	Hanging Valley- Valdez Fiord	Alaska	Prince William Sound				1911	USGS Valdez (A7)	-146.51	61.1014		Film Negative	https://digital.library.cornell.edu/catalog/ss:3322422
3322423	tve_exp1911_339	Hanging Valley- Valdez Fiord	Alaska	Prince William Sound				1911	USGS Valdez (A7)	-146.51	61.1014		Film Negative	https://digital.library.cornell.edu/catalog/ss:3322423
3322424	tve_exp1911_340	Cut in bluff above Chitina	Alaska	Wrangell Mountains				1911	USGS Valdez (C2)	-144.444	61.5167		Film Negative	https://digital.library.cornell.edu/catalog/ss:3322424
3322425	tve_exp1911_341	Cut in bluff above Chitina	Alaska	Wrangell Mountains				1911	USGS Valdez (C2)	-144.444	61.5167		Film Negative	https://digital.library.cornell.edu/catalog/ss:3322425
3322426	tve_exp1911_342	The Copper River. Looking Upstream.	Alaska	Wrangell Mountains				1911					Film Negative	https://digital.library.cornell.edu/catalog/ss:3322426
3322427	tve_exp1911_343	Looking Up Copper River from canyon end	Alaska	Wrangell Mountains				1911					Film Negative	https://digital.library.cornell.edu/catalog/ss:3322427
3322428	tve_exp1911_344	Looking down Copper River Canyon	Alaska	Wrangell Mountains				1911					Film Negative	https://digital.library.cornell.edu/catalog/ss:3322428
3322429	tve_exp1911_345	Copper River Canyon	Alaska	Wrangell Mountains				1911					Film Negative	https://digital.library.cornell.edu/catalog/ss:3322429
3322430	tve_exp1911_346	Chitina	Alaska	Wrangell Mountains				1911	USGS Valdez (C2)	-144.444	61.5167		Film Negative	https://digital.library.cornell.edu/catalog/ss:3322430
3322431	tve_exp1911_347	The forest along Copper River Ry below Chitina	Alaska	Wrangell Mountains				1911	USGS Valdez (C2)	-144.444	61.5167		Film Negative	https://digital.library.cornell.edu/catalog/ss:3322431
3322432	tve_exp1911_348	Loess near Chitina	Alaska	Wrangell Mountains				1911	USGS Valdez (C2)	-144.444	61.5167		Film Negative	https://digital.library.cornell.edu/catalog/ss:3322432
3322433	tve_exp1911_349	Loess with trees near Chitina	Alaska	Wrangell Mountains				1911	USGS Valdez (C2)	-144.444	61.5167		Film Negative	https://digital.library.cornell.edu/catalog/ss:3322433
3322434	tve_exp1911_350	Loess near Chitina	Alaska	Wrangell Mountains				1911	USGS Valdez (C2)	-144.444	61.5167		Film Negative	https://digital.library.cornell.edu/catalog/ss:3322434
3322435	tve_exp1911_351	Looking out under clouds from near Bonanza Mine	Alaska	Wrangell Mountains				1911	USGS McCarthy (B6)	-139.32	63.8996		Film Negative	https://digital.library.cornell.edu/catalog/ss:3322435
3322436	tve_exp1911_352	Rock Glacier back of Kennicott	Alaska	Wrangell Mountains				1911	USGS McCarthy (B6, C6)	-142.886	61.4819		Film Negative	https://digital.library.cornell.edu/catalog/ss:3322436
3322437	tve_exp1911_353	Receding Margin of Kennicott Glacier above mine.	Alaska	Wrangell Mountains	Kennicott Glacier			1911	USGS McCarthy (B6, C6)	-143.04	61.6167		Film Negative	https://digital.library.cornell.edu/catalog/ss:3322437
3322438	tve_exp1911_354	Receding Margin, Kennicott Glacier	Alaska	Wrangell Mountains	Kennicott Glacier			1911	USGS McCarthy (B6, C6)	-143.04	61.6167		Film Negative	https://digital.library.cornell.edu/catalog/ss:3322438
12559263	tve_exp1911_355_02	Muir Glacier - Western Site	Alaska	Glacier Bay	Muir Glacier				USGS Skagway (A3, A4)	-136.376	59.1178		Film Negative	https://digital.library.cornell.edu/catalog/ss:12559263
12556257	tve_exp1911_355	Muir Glacier - Western Site	Alaska	Glacier Bay	Muir Glacier				USGS Skagway (A3, A4)	-136.376	59.1178		Film Negative	https://digital.library.cornell.edu/catalog/ss:12556257
12628303	tve_Ithaca_01.jpg	Film negative of “in college precints” or “rainy day on campus”	New York	Ithaca				1906	USGS Elmira E (Drydan)				Film Negative	https://digital.library.cornell.edu/catalog/ss:12628303
12559264	tve_Ithaca_02.jpg	Taughannock Falls May 26, 1888 as printed in von Engeln's book on p. 68 credited to E. M. Chamot Outing of Camera Club	New York	Ithaca		26	May	1888	USGS Elmira E (Genoa)				Glass	https://digital.library.cornell.edu/catalog/ss:12559264
12559266	tve_Ithaca_03.jpg	Moraine, Freeville, NY	New York	Ithaca					USGS Elmira E (Moravia)			Glaciers 2375|broken	Glass	https://digital.library.cornell.edu/catalog/ss:12559266
12559267	tve_Ithaca_04.jpg	Moraine, Freeville, NY	New York	Ithaca					USGS Elmira E (Moravia)			Glaciers 2375|another copy not broken	Glass	https://digital.library.cornell.edu/catalog/ss:12559267
12559269	tve_Ithaca_05.jpg	Terminal moraine, Freeville, NY	New York	Ithaca				1898	USGS Elmira E (Moravia)			J. O. Martin 1898|glaciers 2501	Glass	https://digital.library.cornell.edu/catalog/ss:12559269
12559271	tve_Ithaca_06.jpg	Kettle in Moraine, Freeville, NY	New York	Ithaca					USGS Elmira E (Moravia)			Glaciers 2511	Glass	https://digital.library.cornell.edu/catalog/ss:12559271
12559272	tve_Ithaca_07.jpg	Ridge of an esker, McLean, NY	New York	Ithaca					USGS Elmira E (Moravia)			Glaciers 2572	Glass	https://digital.library.cornell.edu/catalog/ss:12559272
12559274	tve_Ithaca_08.jpg	Enfield Ravine	New York	Ithaca				1898	USGS Elmira E (Ithaca)			Rivers 384 J. O. Martin, 1898	Glass	https://digital.library.cornell.edu/catalog/ss:12559274
12559275	tve_Ithaca_09.jpg	Enfield ravine from crest of hill	New York	Ithaca				1898	USGS Elmira E (Ithaca)			J. O.Martin 1898|Rivers 390	Glass	https://digital.library.cornell.edu/catalog/ss:12559275
12556273	tve_Ithaca_10.jpg	Fossil delta terrace and valley of present stream which has cut a channel through the Delta, 24 Oct. 1895, C. S. Downes	New York	Ithaca		24	October	1895	USGS Elmira E (Genoa)			Ludlowville, Rivers 741C	Glass	https://digital.library.cornell.edu/catalog/ss:12556273
12556274	tve_Ithaca_11.jpg	Fall creek delta near head of Lake Street Cornell Glacier University Ave, Livingstone May 1894	New York	Ithaca			May	1894	USGS Elmira E (Drydan)			Rivers 1750B	Glass	https://digital.library.cornell.edu/catalog/ss:12556274
12556275	tve_Ithaca_12.jpg	Delta at top of Buffalo Hill, J. B. McHarf Jr. '93	New York	Ithaca					USGS Elmira E (Drydan)			Rivers 1750A	Glass	https://digital.library.cornell.edu/catalog/ss:12556275
12556276	tve_Ithaca_13.jpg	Fossil delta terrace (S- portion) looking South from North position Hook (on right) Mouth of stream Valley cut into the delta, 24 Oct. 1895, C. S. Downes, Ludlowville	New York	Ithaca		24	October	1895	USGS Elmira E (Genoa)			Rivers 1724C	Glass	https://digital.library.cornell.edu/catalog/ss:12556276
12556277	tve_Ithaca_14.jpg	Terminal moraine, Inlet Valley near West Danby, NY, looking southeast C. S. Downes, 1895	New York	Ithaca				1895	USGS Elmira E (Ithaca)			Glaciers 2310	Glass	https://digital.library.cornell.edu/catalog/ss:12556277
12556278	tve_Ithaca_15.jpg	Moraine in Inlet Valley near West Danby, NY looking North, C. S. Downes 5 Oct. 1895	New York	Ithaca		5	October	1895	USGS Elmira E (Ithaca)			Glaciers 2306	Glass	https://digital.library.cornell.edu/catalog/ss:12556278
12556279	tve_Ithaca_16.jpg	Forest Home, near Ithaca	New York	Ithaca					USGS Elmira E (Drydan)			Glaciers 2751A	Glass	https://digital.library.cornell.edu/catalog/ss:12556279
12556280	tve_Ithaca_17.jpg	Inerglacial, Forest Home, Doyle, 1901	New York	Ithaca				1901	USGS Elmira E (Drydan)			Glaciers 2751C	Glass	https://digital.library.cornell.edu/catalog/ss:12556280
12556281	tve_Ithaca_18.jpg	Hanging 6 mile Valley	New York	Ithaca					USGS Elmira E (Drydan)			Glaciers 2923	Glass	https://digital.library.cornell.edu/catalog/ss:12556281
12556282	tve_Ithaca_19.jpg	Forest Home	New York	Ithaca					USGS Elmira E (Drydan)			Glaciers 2751D	Glass	https://digital.library.cornell.edu/catalog/ss:12556282
12556283	tve_Ithaca_20.jpg	Wave built terrace Esty Glen, Ithaca, NY, (4m north of City) C. S. Downes 16 Nov. 1895	New York	Ithaca		16	November	1895	USGS Elmira E (Ithaca)			Ocean 806A	Glass	https://digital.library.cornell.edu/catalog/ss:12556283
12556284	tve_Ithaca_21.jpg	Moraine, Inlet Valley, Greenlee '95	New York	Ithaca					USGS Elmira E (Ithaca)			Glaciers 2301B	Glass	https://digital.library.cornell.edu/catalog/ss:12556284
12556285	tve_Ithaca_22.jpg	Moraine, toward Danby from Coy Glen, Inlet Valley, May 1895 C S, Downes	New York	Ithaca			May	1895	USGS Elmira E (Ithaca)			Glaciers 2301D	Glass	https://digital.library.cornell.edu/catalog/ss:12556285
12556286	tve_Ithaca_23.jpg	Moraine (on left), Inlet Valley looking Southeast at Spencer Summit, Swamp, Marsh, Lake (on right) just South of the Divide (showing the meeting of the overwashed plain and its moraine) 5 Oct. 1895, C. S. Downes	New York	Ithaca		5	October	1895	USGS Elmira E (Ithaca)			Glaciers 2301E	Glass	https://digital.library.cornell.edu/catalog/ss:12556286
12556287	tve_Ithaca_24.jpg	Coy Glen front of the lowest fossil terrace, May 1895, C. S. Downes	New York	Ithaca			May	1895	USGS Elmira E (Ithaca)			Glaciers 2089	Glass	https://digital.library.cornell.edu/catalog/ss:12556287
12556288	tve_Ithaca_25.jpg	Estey Glen, 4 miles North of campus (East side of Lake) Wave built terraces, C. S. Downes, Ithaca, NY 16 Nov. 1895	New York	Ithaca		16	November	1895	USGS Elmira E (Ithaca)			Ocean 803A	Glass	https://digital.library.cornell.edu/catalog/ss:12556288
12556289	tve_Ithaca_26.jpg	Section of Esker near McLean	New York	Ithaca					USGS Elmira E (Moravia)			Glaciers 2580	Glass	https://digital.library.cornell.edu/catalog/ss:12556289
12556290	tve_Ithaca_27.jpg	Ice front 4 mi. north of Horseheads where it is swinging w[est]. Road extends nearly north and south	New York	Ithaca					USGS Elmira E (Elmira)			Local 1079	Glass	https://digital.library.cornell.edu/catalog/ss:12556290
12556291	tve_Ithaca_28.jpg	T. Rivers Gorge [unclear word] Triphammer Falls, Ithaca	New York	Ithaca					USGS Elmira E (Drydan)			1723 4141	Glass	https://digital.library.cornell.edu/catalog/ss:12556291
12556292	tve_Ithaca_29.jpg	Kame-esker mass east of Caroline, Dryden Sheet, NY, Tarr 1904	New York	Ithaca				1904	USGS Elmira E (Drydan)			Local 2020	Positive & Negative film	https://digital.library.cornell.edu/catalog/ss:12556292
12556293	tve_Ithaca_30.jpg	Harford, N. Y. sheet, Center Lisle valley esker, R.S.T. 1904	New York	Ithaca				1904	USGS Elmira E (Harford)			local 2031 or 2051	2 Prints & Negative	https://digital.library.cornell.edu/catalog/ss:12556293
12556294	tve_Ithaca_31.jpg	crest of upper Buttermilk delta, R.S.T.1903	New York	Ithaca				1903	USGS Elmira E (Ithaca)			local 2203	Film Negative	https://digital.library.cornell.edu/catalog/ss:12556294
12556295	tve_Ithaca_32.jpg	Crest of two buttermilk deltas, looking across valley R.S.T. 1903	New York	Ithaca				1903	USGS Elmira E (Ithaca)			local 2204	Film Negative	https://digital.library.cornell.edu/catalog/ss:12556295
12556296	tve_Ithaca_33.jpg	stream cut slope and crest line of one of Buttermilk deltas	New York	Ithaca					USGS Elmira E (Ithaca)			local 2205	Film Negative	https://digital.library.cornell.edu/catalog/ss:12556296
12556297	tve_Ithaca_34.jpg	Watkins, 900 ft delta section. Layers dipping east toward lake R. S.T. 1903	New York	Ithaca				1903	USGS Elmira E (Watkins Glen)			local 2211	Film Negative	https://digital.library.cornell.edu/catalog/ss:12556297
12556298	tve_Ithaca_35.jpg	Ithaca and University with hanging valley of Fall Cr. R.S.T. 1903	New York	Ithaca				1903	USGS Elmira E (Drydan)			local 101	Film Negative	https://digital.library.cornell.edu/catalog/ss:12556298
12556299	tve_Ithaca_36.jpg	Coy Glen deltas, on old plate, short focus, no slide	New York	Ithaca					USGS Elmira E (Ithaca)			enlarge center of this to 5 + 7	Print & Glass	https://digital.library.cornell.edu/catalog/ss:12556299
12556300	tve_Ithaca_37.jpg	Coy Glen delta from State Road April 1928 (long focus lens), negative number 7343	New York	Ithaca			April	1928	USGS Elmira E (Ithaca)				Print & Glass	https://digital.library.cornell.edu/catalog/ss:12556300
12556301	tve_Ithaca_38.jpg	Coy Glen Deltas, April 1928 with short focus lens, slide from middle of this, 7344	New York	Ithaca			April	1928	USGS Elmira E (Ithaca)				Print & Glass	https://digital.library.cornell.edu/catalog/ss:12556301
12556302	tve_Ithaca_39.jpg	Delta south side of buttermilk, shows foal sit beds, April 1928, 7345	New York	Ithaca			April	1928	USGS Elmira E (Ithaca)				Print & Glass	https://digital.library.cornell.edu/catalog/ss:12556302
12556303	tve_Ithaca_40.jpg	Ithaca Falls from below, april 1914	New York	Ithaca			April	1914	USGS Elmira E (Ithaca)				Glass	https://digital.library.cornell.edu/catalog/ss:12556303
12556304	tve_Ithaca_41.jpg	Truncated valley slope, inlet valley, east side - near north Spencer. Looking northeast, June 10, 1928. If north flowing main stream shoul have followed Inlet Valley rather than Spencer account greater width Cayuga Inlet trough,	New York	Ithaca		10	June	1928	USGS Elmira E (Ithaca)				Print and Glass	https://digital.library.cornell.edu/catalog/ss:12556304
12556305	tve_Ithaca_42.jpg	Taughannock Gorge 1924-1925, Buttresses etc. lateral cutting	New York	Ithaca				1924-25	USGS Elmira E (Genoa)				Film Negative	https://digital.library.cornell.edu/catalog/ss:12556305
12556306	tve_Ithaca_43.jpg	Cayuta overflow channel Oct. 1924 slide 7378	New York				October	1924					Glass	https://digital.library.cornell.edu/catalog/ss:12556306
12556307	tve_Ithaca_44.jpg	Interglacial gravel deposit six mile creek at Purifying Station, Light material above ledge Nov. 30, 1928 slide 7383	New York	Ithaca		30	November	1928	USGS Elmira E (Drydan)				Glass	https://digital.library.cornell.edu/catalog/ss:12556307
12556312	tve_Ithaca_45.jpg	Inlet flood (April 1896), Inlet Valley, C. S. Downes	New York	Ithaca			April	1896	USGS Elmira E (Ithaca)			Rivers 1720	Glass	https://digital.library.cornell.edu/catalog/ss:12556312
12556313	tve_Ithaca_46.jpg	The Wallkill River cutting through moraine near New Paultz, NY, J. O. Martin	New York	New Paltz					USGS Scranton E (Newburgh)			Rivers 101A	Glass	https://digital.library.cornell.edu/catalog/ss:12556313
12556314	tve_Ithaca_47.jpg	Water cutting along joints, Ithaca, Falls, Ithaca, NY J. O. Martin 1898	New York	Ithaca				1898	USGS Elmira E (Drydan)			Rivers 207	Glass	https://digital.library.cornell.edu/catalog/ss:12556314
12556315	tve_Ithaca_48.jpg	Trees working in joint planes in Ithaca shales, Ithaca, NY	New York	Ithaca					USGS Elmira E (Ithaca)			weathering 103	Glass	https://digital.library.cornell.edu/catalog/ss:12556315
12556316	tve_Ithaca_49.jpg	Work of roots in shale -- Fall Creek gorge, Ithaca, NY [J.O.] Martin	New York	Ithaca					USGS Elmira E (Ithaca)			weathering 106	Glass	https://digital.library.cornell.edu/catalog/ss:12556316
12556317	tve_Ithaca_50.jpg	Overturned tree, Cortland, NY J.O. Martin 1898	New York	Ithaca				1898	USGS Elmira E (Cortland)			weathering 151	Glass	https://digital.library.cornell.edu/catalog/ss:12556317
12556318	tve_Ithaca_51.jpg	Talus cones, east shore, Cayuga Lake, Ithaca, NY, J. O. Martin April 1896	New York	Ithaca			April	1896	USGS Elmira E (Ithaca)			weathering 759	Glass	https://digital.library.cornell.edu/catalog/ss:12556318
12556319	tve_Ithaca_52.jpg	Moraine crossing Six Mile Creek valley and cut by stream, Ithaca, NY J. O. Martin 1898	New York	Ithaca				1898	USGS Elmira E (Drydan)			rivers 278A	Glass	https://digital.library.cornell.edu/catalog/ss:12556319
12556320	tve_Ithaca_53.jpg	Moraineflap crossing, Six Mile Creek valley, Ithaca, NY J. O. Martin 1898	New York	Ithaca				1898	USGS Elmira E (Drydan)			rivers 328B	Glass	https://digital.library.cornell.edu/catalog/ss:12556320
12556321	tve_Ithaca_54.jpg	Enfield gorge	New York	Ithaca					USGS Elmira E (Ithaca)			rivers 379	Glass	https://digital.library.cornell.edu/catalog/ss:12556321
9417832	tve_lanternslide_0001	Glacier table- Valdez Glacier	Alaska	Prince William Sound	Valdez Glacier			1909	USGS Valdez (A6)	-146.173	61.2051		Lanternslide	https://digital.library.cornell.edu/catalog/ss:9417832
9417833	tve_lanternslide_0002	Rock on column of Muir Glacier	Alaska	Glacier Bay	Muir Glacier				USGS Skagway (A3, A4)	-136.376	59.1178	Taken from newspaper	Lanternslide	https://digital.library.cornell.edu/catalog/ss:9417833
9417834	tve_lanternslide_0003	Debris cones, Valdez Glacier	Alaska	Prince William Sound	Valdez Glacier	18	August	1909	USGS Valdez (A6)	-146.173	61.2051		Lanternslide	https://digital.library.cornell.edu/catalog/ss:9417834
9417835	tve_lanternslide_0004	Push moraine at front of Columbia Glacier	Alaska	Prince William Sound	Columbia Glacier				USGS Seward (D1)	-147.077	61.0958		Lanternslide	https://digital.library.cornell.edu/catalog/ss:9417835
9417836	tve_lanternslide_0005	Moraine Columbia Glacier, Alaska	Alaska	Prince William Sound	Columbia Glacier				USGS Seward (D1)	-147.077	61.0958	Person in picture	Lanternslide	https://digital.library.cornell.edu/catalog/ss:9417836
9417837	tve_lanternslide_0006	Port Wells, (Haska) map	Alaska	Prince William Sound					USGS Seward (D4)	-148.206	60.8544	Illustration	Lanternslide	https://digital.library.cornell.edu/catalog/ss:9417837
9417838	tve_lanternslide_0007	First iceberg, Taku Inlet, Alaska	Alaska	Juneau					USGS Juneau (B1)	-134.054	58.3076		Lanternslide	https://digital.library.cornell.edu/catalog/ss:9417838
9417839	tve_lanternslide_0008	Map of Alaskan glaciers and snow fields	Alaska	Alaska								Illustration	Lanternslide	https://digital.library.cornell.edu/catalog/ss:9417839
9417840	tve_lanternslide_0009	Alaska- Entrance to Wrangell Narrows (Haynes)	Alaska	Southern Panhandle					USGS Petersburg (D3)	-132.929	56.6565	Slide is falling apart	Lanternslide	https://digital.library.cornell.edu/catalog/ss:9417840
9417841	tve_lanternslide_0010	Frederick Sound glaciers (Haynes)	Alaska	Southern Panhandle					USGS Sitka (A1), Sumdum (A6, B6)	-134.12	57.1226		Lanternslide	https://digital.library.cornell.edu/catalog/ss:9417841
9417842	tve_lanternslide_0011	King's Bay glacier, Alaska	Alaska	Prince William Sound						-148.714	60.394		Lanternslide	https://digital.library.cornell.edu/catalog/ss:9417842
9417843	tve_lanternslide_0012	Davidson Glacier, Alaska (Haynes)	Alaska	Glacier Bay	Davidson Glacier				USGS Skagway (A2)	-135.496	59.079		Lanternslide	https://digital.library.cornell.edu/catalog/ss:9417843
9417844	tve_lanternslide_0013	Davidson Glacier, Alaska (Haynes)	Alaska	Glacier Bay	Davidson Glacier				USGS Skagway (A2)	-135.496	59.079	Two images listed as 510	Lanternslide	https://digital.library.cornell.edu/catalog/ss:9417844
9417845	tve_lanternslide_0014	Davidson Glacier, Alaska	Alaska	Glacier Bay	Davidson Glacier				USGS Skagway (A2)	-135.496	59.079		Lanternslide	https://digital.library.cornell.edu/catalog/ss:9417845
9417846	tve_lanternslide_0015	Taku Glacier, Alaska (Haynes)	Alaska	Juneau	Taku Glacier				USGS Juneau (B1)	-134.072	58.4441		Lanternslide	https://digital.library.cornell.edu/catalog/ss:9417846
9417847	tve_lanternslide_0016	Taku Glacier, Alaska (Haynes)	Alaska	Juneau	Taku Glacier				USGS Juneau (B1)	-134.072	58.4441	Slide is falling apart	Lanternslide	https://digital.library.cornell.edu/catalog/ss:9417847
9417848	tve_lanternslide_0017	White Glacier, Mt. Case on right (Reid) Alaska	Alaska	Juneau	White Glacier				USGS Skagway (A4)	-135.969	58.8115		Lanternslide	https://digital.library.cornell.edu/catalog/ss:9417848
9417849	tve_lanternslide_0018	Granite canyon…										Part of description is missing	Lanternslide	https://digital.library.cornell.edu/catalog/ss:9417849
9417850	tve_lanternslide_0019	Rock glacier on McCarthy creek, Alaska	Alaska	Wrangell Mountains					USGS McCarthy (B5, B6)	-142.782	61.4671		Lanternslide	https://digital.library.cornell.edu/catalog/ss:9417850
9417851	tve_lanternslide_0020	Muir Inlet, Alaska - Model	Alaska	Glacier Bay					USGS Skagway (A4)	-136.088	58.8708	Canadian boundary lines	Lanternslide	https://digital.library.cornell.edu/catalog/ss:9417851
9417852	tve_lanternslide_0021	Muir Inlet and front of Muir Inlet	Alaska	Glacier Bay					USGS Skagway (A4)	-136.088	58.8708	Ice front positions in 1800 and 1903	Lanternslide	https://digital.library.cornell.edu/catalog/ss:9417852
9417853	tve_lanternslide_0022	Muir Inlet, by Reid, Nat. Mag.	Alaska	Glacier Bay					USGS Skagway (A4)	-136.088	58.8708	Illustration	Lanternslide	https://digital.library.cornell.edu/catalog/ss:9417853
9417854	tve_lanternslide_0023	Looking up from Muir stream of ice, Muir Glacier (Reid)	Alaska	Glacier Bay	Muir Glacier				USGS Skagway (A4)	-136.376	59.1178		Lanternslide	https://digital.library.cornell.edu/catalog/ss:9417854
9417855	tve_lanternslide_0024	Girdled Glacier and moraines, Alaska (Reid)	Alaska	Glacier Bay	Girdled Glacier				USGS Juneau (D6)	-135.735	58.9461		Lanternslide	https://digital.library.cornell.edu/catalog/ss:9417855
9417856	tve_lanternslide_0025	Muir Glacier, western site	Alaska	Glacier Bay	Muir Glacier			1911	USGS Skagway (A3)	-136.376	59.1178		Lanternslide	https://digital.library.cornell.edu/catalog/ss:9417856
9417857	tve_lanternslide_0026	Ice front of Muir Glacier and delta of western subglacial stream (Reid)	Alaska	Glacier Bay	Muir Glacier				USGS Skagway (A3)	-136.376	59.1178		Lanternslide	https://digital.library.cornell.edu/catalog/ss:9417857
9417858	tve_lanternslide_0027	Mts. Case and Wright, Muir Glacier, Alaska (Reid)	Alaska	Glacier Bay	Muir Glacier				USGS Skagway (A4)	-136.376	59.1178		Lanternslide	https://digital.library.cornell.edu/catalog/ss:9417858
9417859	tve_lanternslide_0028	Muir Glacier, Alaska (Haynes)	Alaska	Glacier Bay	Muir Glacier				USGS Skagway (A3, A4)	-136.376	59.1178		Lanternslide	https://digital.library.cornell.edu/catalog/ss:9417859
9417860	tve_lanternslide_0029	Muir Glacier crevasse, Alaska (Haynes)	Alaska	Glacier Bay	Muir Glacier				USGS Skagway (A3, A4)	-136.376	59.1178		Lanternslide	https://digital.library.cornell.edu/catalog/ss:9417860
9417861	tve_lanternslide_0030	Across the top of Muir Glacier, Alaska	Alaska	Glacier Bay	Muir Glacier				USGS Skagway (A3, A4)	-136.376	59.1178		Lanternslide	https://digital.library.cornell.edu/catalog/ss:9417861
9417862	tve_lanternslide_0031	Ice front of Muir Glacier, Alaska (Reid)	Alaska	Glacier Bay	Muir Glacier				USGS Skagway (A3, A4)	-136.376	59.1178		Lanternslide	https://digital.library.cornell.edu/catalog/ss:9417862
9417863	tve_lanternslide_0032	Muir Glacier, Alaska (Haynes)	Alaska	Glacier Bay	Muir Glacier				USGS Skagway (A3, A4)	-136.376	59.1178		Lanternslide	https://digital.library.cornell.edu/catalog/ss:9417863
9417864	tve_lanternslide_0033	Muir Glacier from the moraine (Haynes)	Alaska	Glacier Bay	Muir Glacier				USGS Skagway (A3, A4)	-136.376	59.1178		Lanternslide	https://digital.library.cornell.edu/catalog/ss:9417864
9417865	tve_lanternslide_0034	Alaska- Muir Glacier	Alaska	Glacier Bay	Muir Glacier				USGS Skagway (A3, A4)	-136.376	59.1178		Lanternslide	https://digital.library.cornell.edu/catalog/ss:9417865
9417866	tve_lanternslide_0035	Alaska- Muir Glacier	Alaska	Glacier Bay	Muir Glacier				USGS Skagway (A3, A4)	-136.376	59.1178		Lanternslide	https://digital.library.cornell.edu/catalog/ss:9417866
9417867	tve_lanternslide_0036	Muir Glacier, Alaska	Alaska	Glacier Bay	Muir Glacier				USGS Skagway (A3, A4)	-136.376	59.1178	Part of boat in picture	Lanternslide	https://digital.library.cornell.edu/catalog/ss:9417867
9417868	tve_lanternslide_0037	Face of Muir Glacier, Alaska (Haynes)	Alaska	Glacier Bay	Muir Glacier				USGS Skagway (A3, A4)	-136.376	59.1178		Lanternslide	https://digital.library.cornell.edu/catalog/ss:9417868
9417869	tve_lanternslide_0038	Muir Glacier, Alaska (Haynes)	Alaska	Glacier Bay	Muir Glacier				USGS Skagway (A3, A4)	-136.376	59.1178	Two images listed as 575	Lanternslide	https://digital.library.cornell.edu/catalog/ss:9417869
9417870	tve_lanternslide_0039	Taku Glacier, Alaska	Alaska	Juneau	Taku Glacier				USGS Juneau (B1)	-134.072	58.4441		Lanternslide	https://digital.library.cornell.edu/catalog/ss:9417870
9417871	tve_lanternslide_0040	Buried forest, looking west, Reid, Alaska	Alaska	Glacier Bay					USGS Skagway (A4)				Lanternslide	https://digital.library.cornell.edu/catalog/ss:9417871
9417872	tve_lanternslide_0041	Buried forest, looking eastward, Mt. Case in distance (Reid)	Alaska	Glacier Bay					USGS Skagway (A4)	-135.969	58.8115		Lanternslide	https://digital.library.cornell.edu/catalog/ss:9417872
9417873	tve_lanternslide_0042	Malaspina Glacier	Alaska	Yakutat	Malaspina Glacier			1891	USGS Yaktuat (D7), Mount St. Elias (A7)	-140.529	1871772 59.93292675514918	Illustration	Lanternslide	https://digital.library.cornell.edu/catalog/ss:9417873
9417874	tve_lanternslide_0043	Malaspina Glacier- area compared to Massachusetts	Alaska	Yakutat	Malaspina Glacier				USGS Yaktuat (D7), Mount St. Elias (A7)	-140.529	1871772 59.93292675514918	Illustration	Lanternslide	https://digital.library.cornell.edu/catalog/ss:9417874
9417875	tve_lanternslide_0044	Mt. St. Elias and Malaspina Glacier from Puget Peninsula, Boundary Commission	Alaska	Yakutat	Malaspina Glacier				USGS Yaktuat (D7), Mount St. Elias (A7)	-140.529	1871772 59.93292675514918		Lanternslide	https://digital.library.cornell.edu/catalog/ss:9417875
9417876	tve_lanternslide_0045	Malaspina Glacier, from mountains of Puget Peninsula, Boundary Commission	Alaska	Yakutat	Malaspina Glacier				USGS Yaktuat (D7), Mount St. Elias (A7)	-140.529	1871772 59.93292675514918		Lanternslide	https://digital.library.cornell.edu/catalog/ss:9417876
9417877	tve_lanternslide_0046	Mt. St. Elias|Alpine Vol. 19	Alaska	Yakutat					USGS Mount St. Elias (B8)	-140.93	60.291	Image shows people on glacier	Lanternslide	https://digital.library.cornell.edu/catalog/ss:9417877
9417878	tve_lanternslide_0047	Mt. St. Elias from west end of sound over hills, glacier in foreground	Alaska	Yakutat					USGS Mount St. Elias (B8)	-140.93	60.291		Lanternslide	https://digital.library.cornell.edu/catalog/ss:9417878
9417879	tve_lanternslide_0048	Southern face of Mt. St. Elias, Alaska (Russell)	Alaska	Yakutat					USGS Mount St. Elias (B8)	-140.93	60.291	Image shows people on glacier	Lanternslide	https://digital.library.cornell.edu/catalog/ss:9417879
9417880	tve_lanternslide_0049	Surface of central Malaspina Glacier, Alaska (Russell)	Alaska	Yakutat	Malaspina Glacier				USGS Yaktuat (D7), Mount St. Elias (A7)	-140.529	1871772 59.93292675514918	Image shows people on glacier	Lanternslide	https://digital.library.cornell.edu/catalog/ss:9417880
9417881	tve_lanternslide_0050	Malaspina Glacier from summit of Chaix Hill, Alaska	Alaska	Yakutat	Malaspina Glacier				USGS Yaktuat (D7), Mount St. Elias (A7)	-140.529	1871772 59.93292675514918		Lanternslide	https://digital.library.cornell.edu/catalog/ss:9417881
9417882	tve_lanternslide_0051	Marginal drainage moraine, covered border of Malaspina Glacier (Chaix Hill) (Russell)	Alaska	Yakutat	Malaspina Glacier				USGS Yaktuat (D7), Mount St. Elias (A7)	-140.529	1871772 59.93292675514918		Lanternslide	https://digital.library.cornell.edu/catalog/ss:9417882
9417883	tve_lanternslide_0052	Ablation moraine, general view #1							USGS Yaktuat (D7), Mount St. Elias (A7)			Had two numbers	Lanternslide	https://digital.library.cornell.edu/catalog/ss:9417883
9417884	tve_lanternslide_0053	Sitagi Bluffs, southern margin of Malaspina Glacier, (Russell)	Alaska	Yakutat	Malaspina Glacier				USGS Yaktuat (C7, C8)	-140.818	59.7384		Lanternslide	https://digital.library.cornell.edu/catalog/ss:9417884
9417885	tve_lanternslide_0054	Margin of Malaspina Glacier, Alaska (Russell)	Alaska	Yakutat	Malaspina Glacier				USGS Yaktuat (C7, C8)	-140.529	1871772 59.93292675514918		Lanternslide	https://digital.library.cornell.edu/catalog/ss:9417885
9417886	tve_lanternslide_0055	Vegetation of Malaspina Glacier, Alaska (Russell)	Alaska	Yakutat	Malaspina Glacier				USGS Yaktuat (C7, C8)	-140.529	1871772 59.93292675514918		Lanternslide	https://digital.library.cornell.edu/catalog/ss:9417886
9417887	tve_lanternslide_0056	Southern margin of Malaspina Glacier, country recently abandoned by ice, (Russell)	Alaska	Yakutat	Malaspina Glacier				USGS Yaktuat (C7, C8)	-140.529	1871772 59.93292675514918		Lanternslide	https://digital.library.cornell.edu/catalog/ss:9417887
9417888	tve_lanternslide_0057	Vegetation southern border of Malaspina glacier, Alaska (Russell)	Alaska	Yakutat	Malaspina Glacier				USGS Yaktuat (C7, C8)	-140.529	1871772 59.93292675514918		Lanternslide	https://digital.library.cornell.edu/catalog/ss:9417888
9417889	tve_lanternslide_0058	Tree broken by recent advance of ice, near Point Manby, Alaska, (Russell)	Alaska	Yakutat					USGS Yaktuat (C7)	-140.304	59.6952		Lanternslide	https://digital.library.cornell.edu/catalog/ss:9417889
9417890	tve_lanternslide_0059	Sunset up Kwik River- Mal glacier in distance- from Strawberry Island	Alaska	Yakutat		15	August	1906	USGS Yaktuat (D5)	-139.845	59.8293		Lanternslide	https://digital.library.cornell.edu/catalog/ss:9417890
9417891	tve_lanternslide_0060	Up the Kwik from Strawberry Island	Alaska	Yakutat				1906	USGS Yaktuat (D5)	-139.845	59.8293		Lanternslide	https://digital.library.cornell.edu/catalog/ss:9417891
9417892	tve_lanternslide_0061	St. Elias, Augusta, and Mt. Lawrence, Kwik in foreground- from Strawberry	Alaska	Yakutat		16	August	1909	USGS Yaktuat (D5)	-140.003	59.9192		Lanternslide	https://digital.library.cornell.edu/catalog/ss:9417892
9417893	tve_lanternslide_0062	The Kwik River from Strawberry Island	Alaska	Yaktuat		13	July	1906	USGS Yaktuat (D5)	-140.003	59.9192		Lanternslide	https://digital.library.cornell.edu/catalog/ss:9417893
9417894	tve_lanternslide_0063	Sunset and Mt. St. Elias above clouds, from Strawberry Island, Kwik River in foreground	Alaska	Yaktuat		15	August	1906	USGS Yaktuat (D5)	-140.93	60.291		Lanternslide	https://digital.library.cornell.edu/catalog/ss:9417894
9417895	tve_lanternslide_0064	Kwik River and Mt. Cook, sawtooth waves in Kwik River- from Cottonwood camp		Yaktuat		11	August	1906	USGS Yaktuat (D5)	-140.003	59.9192		Lanternslide	https://digital.library.cornell.edu/catalog/ss:9417895
9417896	tve_lanternslide_0065	Yahtse River from above ice tunnel, Alaska	Alaska	Yakutat					USGS Icy Bay (D1)	-141.281	59.898		Lanternslide	https://digital.library.cornell.edu/catalog/ss:9417896
9417897	tve_lanternslide_0066	Outwash plain- source stream from Malaspina border (see channel left foreground), Yahtse River	Alaska	Yaktuat					USGS Icy Bay (D1)	-141.281	59.898		Lanternslide	https://digital.library.cornell.edu/catalog/ss:9417897
9417898	tve_lanternslide_0067	Alluvial fan now being formed by esker stream (W.) side of Yakutat- Alaska (Russell)	Alaska	Yakutat					USGS Yaktuat (D5)				Lanternslide	https://digital.library.cornell.edu/catalog/ss:9417898
9417899	tve_lanternslide_0068	Encroachment of Atrevida alluvial fan on forest, elevation 110 ft., USGS	Alaska	Yaktuat		15	August	1905	USGS Yaktuat (D5)	-139.787	59.9709		Lanternslide	https://digital.library.cornell.edu/catalog/ss:9417899
9417900	tve_lanternslide_0069	Alluvial fan, mouth of esker stream, Alaska (Russell)	Alaska	Yakutat					USGS Yaktuat (D5)				Lanternslide	https://digital.library.cornell.edu/catalog/ss:9417900
9417901	tve_lanternslide_0070	Surface of alluvial fan of the Yahtse, partly buried forest, Alaska (Russell)	Alaska	Yakutat					USGS Icy Bay (D1)	-141.281	59.898		Lanternslide	https://digital.library.cornell.edu/catalog/ss:9417901
9417902	tve_lanternslide_0071	Canyon in Chaix Hills, Alaska. moraine material, containing shells	Alaska	Yaktuat					USGS Bering Glacier (A1)	-141.11	60.058		Lanternslide	https://digital.library.cornell.edu/catalog/ss:9417902
9417903	tve_lanternslide_0072	Malaspina Glacier from crest of Blossom Island, panorama	Alaska	Yakutat	Malaspina Glacier	30	July	1906	USGS Yaktuat (D7), Mount St. Elias (A7)	-140.529	1871772 59.93292675514918		Lanternslide	https://digital.library.cornell.edu/catalog/ss:9417903
9417904	tve_lanternslide_0073	Malaspina Glacier from crest of Blossom Island, panorama	Alaska	Yaktuat	Malaspina Glacier	30	July	1906	USGS Yaktuat (D7), Mount St. Elias (A7)	-140.529	1871772 59.93292675514918		Lanternslide	https://digital.library.cornell.edu/catalog/ss:9417904
9417905	tve_lanternslide_0074	Marvine Glacier from north (crest) of Blossom Island	Alaska	Yaktuat	Marvine Glacier	30	July	1906	USGS Mount St. Elias (A6)	-140.203	60.0432		Lanternslide	https://digital.library.cornell.edu/catalog/ss:9417905
9417906	tve_lanternslide_0075	General view of crevasses from northern edge of Marvine Glacier	Alaska	Yakutat	Marvine Glacier	29	July	1906	USGS Mount St. Elias (A6)	-140.203	60.0432		Lanternslide	https://digital.library.cornell.edu/catalog/ss:9417906
9417907	tve_lanternslide_0076	Crevassing on northern edge of Marvine Glacier	Alaska	Yakutat	Marvine Glacier	29	July	1906	USGS Mount St. Elias (A6)	-140.203	60.0432		Lanternslide	https://digital.library.cornell.edu/catalog/ss:9417907
9417908	tve_lanternslide_0077	Crevassed western edge of Marvine Glacier	Alaska	Yakutat	Marvine Glacier	29	July	1906	USGS Mount St. Elias (A6)	-140.203	60.0432		Lanternslide	https://digital.library.cornell.edu/catalog/ss:9417908
9417909	tve_lanternslide_0078	Crevassing along west margin of Marvine Glacier	Alaska	Yaktuat	Marvine Glacier	29	July	1906	USGS Mount St. Elias (A6)	-140.203	60.0432		Lanternslide	https://digital.library.cornell.edu/catalog/ss:9417909
9417910	tve_lanternslide_0079	Advance of Marvine Glacier, 1 1/2 mile below Cottonwood Camp	Alaska	Yaktuat	Marvine Glacier	11	August	1906	USGS Mount St. Elias (A6)	-140.203	60.0432		Lanternslide	https://digital.library.cornell.edu/catalog/ss:9417910
9417911	tve_lanternslide_0080	Advancing Malaspina Glacier on west side of Kwik River, 3 miles from coast	Alaska	Yakutat	Marvine Glacier	14	July	1906	USGS Yaktuat (D7), Mount St. Elias (A7)	-140.529	1871772 59.93292675514918		Lanternslide	https://digital.library.cornell.edu/catalog/ss:9417911
9417912	tve_lanternslide_0081	Advancing Malaspina Glacier on west side of Kwik River, 3+ miles from coast	Alaska	Yakutat	Malaspina Glacier	14	July	1906	USGS Yaktuat (D7), Mount St. Elias (A7)	-140.529	1871772 59.93292675514918		Lanternslide	https://digital.library.cornell.edu/catalog/ss:9417912
9417913	tve_lanternslide_0082	Advancing Glacier Ice blocks breaking out through soil trees moving across river valley, Malaspina Glacier, Kwik R.	Alaska	Yakutat	Malaspina Glacier				USGS Yaktuat (D7), Mount St. Elias (A7)	-140.529	1871772 59.93292675514918	Two numbers, not mentioned in ledger	Lanternslide	https://digital.library.cornell.edu/catalog/ss:9417913
9417914	tve_lanternslide_0083	Advance of Malaspina Glacier, 1 1/4 mile from Cottonwood Camp	Alaska	Yaktuat	Malaspina Glacier	11	August	1906	USGS Yaktuat (D7), Mount St. Elias (A7)	-140.529	1871772 59.93292675514918		Lanternslide	https://digital.library.cornell.edu/catalog/ss:9417914
9417915	tve_lanternslide_0084	Fan and destruction of vegetation by advancing Marvine Glacier at Cottonwood Camp	Alaska	Yakutat	Malaspina Glacier	9	August	1906	USGS Mount St. Elias (A6)	-140.203	60.0432		Lanternslide	https://digital.library.cornell.edu/catalog/ss:9417915
9417916	tve_lanternslide_0085	Outflow stream at Blossom Island	Alaska	Yakutat		30	July	1906	USGS Yakutat (D6), Mount St. Elias (A6)	-140.115	59.9997		Lanternslide	https://digital.library.cornell.edu/catalog/ss:9417916
9417917	tve_lanternslide_0086	Map of Cornell Glacier, Lat. 74 degrees 10 minutes	Greenland	Nuussuaq Peninsula (Upernavik Archipelago)	Cornell Glacier					-55.9697	74.2259	Illustration	Lanternslide	https://digital.library.cornell.edu/catalog/ss:9417917
9417918	tve_lanternslide_0087	Standard moraine north end of North Cornell Glacier, Greenland	Greenland	Nuussuaq Peninsula (Upernavik Archipelago)	Cornell Glacier			1896		-55.9697	74.2259	Illustration	Lanternslide	https://digital.library.cornell.edu/catalog/ss:9417918
9417919	tve_lanternslide_0088	Greenland ice cap seen from top of Devil's Thumb (2600 ft) ([J.O] Martin)	Greenland	Nuussuaq Peninsula (Upernavik Archipelago)				1896		-56.4598	74.31	Slide is dirty, difficult to see image	Lanternslide	https://digital.library.cornell.edu/catalog/ss:9417919
9417920	tve_lanternslide_0089	South Cornell Glacier (Tarr)	Greenland	Nuussuaq Peninsula (Upernavik Archipelago)	Cornell Glacier			1896		-55.9697	74.2259	Camp in picture	Lanternslide	https://digital.library.cornell.edu/catalog/ss:9417920
9417921	tve_lanternslide_0090	North Cornell Glacier, Greenland ([J.O] Martin)	Greenland	Nuussuaq Peninsula (Upernavik Archipelago)	Cornell Glacier			1896		-55.9697	74.2259		Lanternslide	https://digital.library.cornell.edu/catalog/ss:9417921
9417922	tve_lanternslide_0091	South Cornell Glacier	Greenland	Nuussuaq Peninsula (Upernavik Archipelago)	Cornell Glacier			1896		-55.9697	74.2259		Lanternslide	https://digital.library.cornell.edu/catalog/ss:9417922
9417923	tve_lanternslide_0092	South Cornell Glacier ([J.O] Martin)	Greenland	Nuussuaq Peninsula (Upernavik Archipelago)	Cornell Glacier			1896		-55.9697	74.2259	Blurry photo	Lanternslide	https://digital.library.cornell.edu/catalog/ss:9417923
9417924	tve_lanternslide_0093	North Cornell Glacier, Greenland ([J.O] Martin)	Greenland	Nuussuaq Peninsula (Upernavik Archipelago)	Cornell Glacier			1896		-55.9697	74.2259	Part of image is blurry	Lanternslide	https://digital.library.cornell.edu/catalog/ss:9417924
9417925	tve_lanternslide_0094	South Cornell Glacier, Nunatak ([J.O] Martin)	Greenland	Nuussuaq Peninsula (Upernavik Archipelago)	Cornell Glacier			1896		-55.9697	74.2259		Lanternslide	https://digital.library.cornell.edu/catalog/ss:9417925
9417926	tve_lanternslide_0095	Southern end of Cornell Glacier near Nunatak ([J.O.] Martin)	Greenland	Nuussuaq Peninsula (Upernavik Archipelago)	Cornell Glacier			1896		-55.9697	74.2259		Lanternslide	https://digital.library.cornell.edu/catalog/ss:9417926
9417927	tve_lanternslide_0096	Part of south end of Cornell Glacier ([J.O.] Martin)	Greenland	Nuussuaq Peninsula (Upernavik Archipelago)	Cornell Glacier			1896		-55.9697	74.2259	Part of image is blurry	Lanternslide	https://digital.library.cornell.edu/catalog/ss:9417927
9417928	tve_lanternslide_0097	Mt. Hope- a partial Nunatak Cornell Glacier ([J.O] Martin)	Greenland	Nuussuaq Peninsula (Upernavik Archipelago)	Cornell Glacier			1896		-56.0062	74.2857		Lanternslide	https://digital.library.cornell.edu/catalog/ss:9417928
9417929	tve_lanternslide_0098	Mt. Hope- a partial Nunatak Cornell Glacier ([J.O.] Martin)	Greenland	Nuussuaq Peninsula (Upernavik Archipelago)	Cornell Glacier			1896		-56.0062	74.2857	Part of image is blurry	Lanternslide	https://digital.library.cornell.edu/catalog/ss:9417929
9417930	tve_lanternslide_0099	Mt. Schurman, a nunatak in Cornell Glacier ([J.O.] Martin)	Greenland	Nuussuaq Peninsula (Upernavik Archipelago)	Cornell Glacier			1896		-56.0538	74.3718		Lanternslide	https://digital.library.cornell.edu/catalog/ss:9417930
9417931	tve_lanternslide_0100	Mt. Schurman- Cornell Glacier ([J.O.] Martin)	Greenland	Nuussuaq Peninsula (Upernavik Archipelago)	Cornell Glacier					-56.0538	74.3718		Lanternslide	https://digital.library.cornell.edu/catalog/ss:9417931
9417932	tve_lanternslide_0101	Mt. Schurman from Mt. Hope, Cornell Glacier (Tarr)	Greenland	Nuussuaq Peninsula (Upernavik Archipelago)	Cornell Glacier			1896		-56.0538	74.3718		Lanternslide	https://digital.library.cornell.edu/catalog/ss:9417932
9417933	tve_lanternslide_0102	Devil's Thumb, seen from the ice cap on way to Mt. Schurman ([J.O.] Martin)	Greenland	Nuussuaq Peninsula (Upernavik Archipelago)				1896		-56.4598	74.31		Lanternslide	https://digital.library.cornell.edu/catalog/ss:9417933
9417934	tve_lanternslide_0103	Moraine ex from Mt. Schurman ([J.O.] Martin)	Greenland	Nuussuaq Peninsula (Upernavik Archipelago)				1896		-56.0538	74.3718	Very difficult to read description	Lanternslide	https://digital.library.cornell.edu/catalog/ss:9417934
9417935	tve_lanternslide_0104	Mt. Schurman from the ice cap ([J.O.] Martin)	Greenland	Nuussuaq Peninsula (Upernavik Archipelago)				1896		-56.0538	74.3718	Man in picture	Lanternslide	https://digital.library.cornell.edu/catalog/ss:9417935
9417936	tve_lanternslide_0105	Ice cap, Cornell Glacier	Greenland	Nuussuaq Peninsula (Upernavik Archipelago)	Cornell Glacier					-55.9697	74.2259	Man in picture	Lanternslide	https://digital.library.cornell.edu/catalog/ss:9417936
9417937	tve_lanternslide_0106	Ice sheet Greenland- interior surface. Picture in marginal part, summer, slushy. Cornell Glacier	Greenland	Nuussuaq Peninsula (Upernavik Archipelago)	Cornell Glacier					-55.9697	74.2259	Man in picture	Lanternslide	https://digital.library.cornell.edu/catalog/ss:9417937
9417938	tve_lanternslide_0107	Surface of ice cap, Nugsuak	Greenland	Nuussuaq Peninsula (Upernavik Archipelago)									Lanternslide	https://digital.library.cornell.edu/catalog/ss:9417938
9417939	tve_lanternslide_0108	Lake on surface of Cornell Glacier near Mt. Schurman ([J.O.] Martin)	Greenland	Nuussuaq Peninsula (Upernavik Archipelago)	Cornell Glacier			1896		-55.9697	74.2259		Lanternslide	https://digital.library.cornell.edu/catalog/ss:9417939
9417940	tve_lanternslide_0109	Surface of Cornell Glacier, smooth part ([J.O.] Martin)	Greenland	Nuussuaq Peninsula (Upernavik Archipelago)	Cornell Glacier			1896		-55.9697	74.2259		Lanternslide	https://digital.library.cornell.edu/catalog/ss:9417940
9417941	tve_lanternslide_0110	Cut in glacial soil, EC + N Ry	Greenland	Nuussuaq Peninsula (Upernavik Archipelago)									Lanternslide	https://digital.library.cornell.edu/catalog/ss:9417941
9417942	tve_lanternslide_0111	Broken surface, Cornell Glacier (Tarr)	Greenland	Nuussuaq Peninsula (Upernavik Archipelago)	Cornell Glacier			1896		-55.9697	74.2259		Lanternslide	https://digital.library.cornell.edu/catalog/ss:9417942
9417943	tve_lanternslide_0112	Edge of north Cornell Glacier (Tarr)	Greenland	Nuussuaq Peninsula (Upernavik Archipelago)	Cornell Glacier			1896		-55.9697	74.2259		Lanternslide	https://digital.library.cornell.edu/catalog/ss:9417943
9417944	tve_lanternslide_0113	Ice front- greenland glacier	Greenland	Nuussuaq Peninsula (Upernavik Archipelago)									Lanternslide	https://digital.library.cornell.edu/catalog/ss:9417944
9417945	tve_lanternslide_0114	End of Nugsuak Glacier (Tarr)	Greenland	Nuussuaq Peninsula (Upernavik Archipelago)	Nugsuak Glacier			1896		-56.7492	74.1748		Lanternslide	https://digital.library.cornell.edu/catalog/ss:9417945
9417946	tve_lanternslide_0115	End of Nugsuak Glacier, upper Nugsuak peninsula (Tarr)	Greenland	Nuussuaq Peninsula (Upernavik Archipelago)	Nugsuak Glacier					-56.7492	74.1748		Lanternslide	https://digital.library.cornell.edu/catalog/ss:9417946
9417947	tve_lanternslide_0116	Sea end of Nugsuak Glacier, Greenland (Tarr)	Greenland	Nuussuaq Peninsula (Upernavik Archipelago)	Nugsuak Glacier			1896		-56.7492	74.1748		Lanternslide	https://digital.library.cornell.edu/catalog/ss:9417947
9417948	tve_lanternslide_0117	Terminus of Looped Glacier- of upper Nugsuak peninsula (Tarr)	Greenland	Nuussuaq Peninsula (Upernavik Archipelago)				1896		-56.7492	74.1748		Lanternslide	https://digital.library.cornell.edu/catalog/ss:9417948
9417949	tve_lanternslide_0118	Sea terminus of Nugsuak Glacier (Tarr)	Greenland	Nuussuaq Peninsula (Upernavik Archipelago)	Nugsuak Glacier			1896		-56.7492	74.1748		Lanternslide	https://digital.library.cornell.edu/catalog/ss:9417949
9417950	tve_lanternslide_0119	Boulder in end of upper Nugsuak (Tarr)	Greenland	Nuussuaq Peninsula (Upernavik Archipelago)						-56.7492	74.1748		Lanternslide	https://digital.library.cornell.edu/catalog/ss:9417950
9417951	tve_lanternslide_0120	Boulder carried by Nugsuak Glacier (Tarr)	Greenland	Nuussuaq Peninsula (Upernavik Archipelago)	Nugsuak Glacier			1896		-56.7492	74.1748	Man in picture	Lanternslide	https://digital.library.cornell.edu/catalog/ss:9417951
9417952	tve_lanternslide_0121	Contact of Cornell Glacier and south end of Mt. Hope ([J.O.] Martin)	Greenland	Nuussuaq Peninsula (Upernavik Archipelago)	Cornell Glacier			1896		-56.0062	74.2857		Lanternslide	https://digital.library.cornell.edu/catalog/ss:9417952
9417953	tve_lanternslide_0122	Delta in lake at edge of ice east side of Mt. Hope (Tarr)	Greenland	Nuussuaq Peninsula (Upernavik Archipelago)				1896		-56.0062	74.2857		Lanternslide	https://digital.library.cornell.edu/catalog/ss:9417953
9417954	tve_lanternslide_0123	Surface of Cornell Glacier	Greenland	Nuussuaq Peninsula (Upernavik Archipelago)	Cornell Glacier					-55.9697	74.2259		Lanternslide	https://digital.library.cornell.edu/catalog/ss:9417954
9417955	tve_lanternslide_0124	Ice sheet Greenland- St. border shows ground moraine, Cornell Glacier Gl. Area	Greenland	Nuussuaq Peninsula (Upernavik Archipelago)	Cornell Glacier			1896		-55.9697	74.2259		Lanternslide	https://digital.library.cornell.edu/catalog/ss:9417955
9417956	tve_lanternslide_0125	Edge of ice- Cornell Glacier (Tarr)	Greenland	Nuussuaq Peninsula (Upernavik Archipelago)	Cornell Glacier			1896		-55.9697	74.2259	Slide is dirty, difficult to see	Lanternslide	https://digital.library.cornell.edu/catalog/ss:9417956
9417957	tve_lanternslide_0126	Moraine and dirt bands, edge of Cornell Glacier (Tarr)	Greenland	Nuussuaq Peninsula (Upernavik Archipelago)	Cornell Glacier			1896		-55.9697	74.2259		Lanternslide	https://digital.library.cornell.edu/catalog/ss:9417957
9417958	tve_lanternslide_0127	Debris on edge of ice, Cornell Glacier (Tarr)	Greenland	Nuussuaq Peninsula (Upernavik Archipelago)	Cornell Glacier			1896		-55.9697	74.2259		Lanternslide	https://digital.library.cornell.edu/catalog/ss:9417958
9417959	tve_lanternslide_0128	Moraine at edge of ice base of upper Nugsuak (Tarr)	Greenland	Nuussuaq Peninsula (Upernavik Archipelago)				1896		-56.9146	74.1521		Lanternslide	https://digital.library.cornell.edu/catalog/ss:9417959
9417960	tve_lanternslide_0129	Contact of ice with Mt. Hope (Tarr)	Greenland	Nuussuaq Peninsula (Upernavik Archipelago)				1896		-56.0062	74.2857		Lanternslide	https://digital.library.cornell.edu/catalog/ss:9417960
9417961	tve_lanternslide_0130	Lenticular moving on Bowdoin Glacier (Libbey)	Greenland	Qaanaaq	Bowdoin Glacier			1894 or 1899		-68.6983	77.6931		Lanternslide	https://digital.library.cornell.edu/catalog/ss:9417961
9417962	tve_lanternslide_0131	Curved ice lines- Bowdoin Glacier (Libbey)	Greenland	Qaanaaq	Bowdoin Glacier			1894 or 1899		-68.931	77.7152		Lanternslide	https://digital.library.cornell.edu/catalog/ss:9417962
9417963	tve_lanternslide_0132	Terminal face of Tuktoo Glacier, Greenland (Libbey)	Greenland	Qaanaaq	Tuktoo			1894 or 1899		-68.931	77.7152	Tugto is modern name	Lanternslide	https://digital.library.cornell.edu/catalog/ss:9417963
9417964	tve_lanternslide_0133	Lenticular, Fan Glacier, Greenland (Libbey)	Greenland	Qaanaaq	Bowdoin Glacier			1894 or 1899		-69.687	77.563		Lanternslide	https://digital.library.cornell.edu/catalog/ss:9417964
9417965	tve_lanternslide_0134	Ice arched by under rock, Cornell Glacier (Tarr)	Greenland	Nuussuaq Peninsula (Upernavik Archipelago)	Cornell Glacier			1896		-55.9697	74.2259		Lanternslide	https://digital.library.cornell.edu/catalog/ss:9417965
10665326	tve_lanternslide_0134b	Ice arched by under rock, Cornell Glacier (Tarr)	Greenland	Nuussuaq Peninsula (Upernavik Archipelago)	Cornell Glacier			1896		-55.9697	74.2259		Lanternslide	https://digital.library.cornell.edu/catalog/ss:10665326
9417966	tve_lanternslide_0135	Fan Glacier, lenticular masses (Libbey)	Greenland	Qaanaaq	Fan Glacier			1894 or 1899		-69.687	77.563		Lanternslide	https://digital.library.cornell.edu/catalog/ss:9417966
9417967	tve_lanternslide_0136	Stratified ice- Bowdoin Glacier, east face (Libbey)	Greenland	Qaanaaq	Bowdoin Glacier			1894 or 1899		-68.6983	77.6931		Lanternslide	https://digital.library.cornell.edu/catalog/ss:9417967
9417968	tve_lanternslide_0137	Stream on surface of glacier, Bowdoin Glacier (Libbey)	Greenland	Qaanaaq	Bowdoin Glacier			1894 or 1899		-68.6983	77.6931		Lanternslide	https://digital.library.cornell.edu/catalog/ss:9417968
9417969	tve_lanternslide_0138	Glacier, marginal channel	Greenland	Qaanaaq								Description is blurred	Lanternslide	https://digital.library.cornell.edu/catalog/ss:9417969
9417970	tve_lanternslide_0139	Bowdoin Glacier, North Greenland (Libbey)	Greenland	Qaanaaq	Bowdoin Glacier			1894 or 1899		-68.6983	77.6931		Lanternslide	https://digital.library.cornell.edu/catalog/ss:9417970
9417971	tve_lanternslide_0140	Waterfall- marginal drainage between Cornell Glacier and Mt. Hope (Tarr)	Greenland	Nuussuaq Peninsula (Upernavik Archipelago)	Cornell Glacier			1896		-56.0062	74.2857		Lanternslide	https://digital.library.cornell.edu/catalog/ss:9417971
9417972	tve_lanternslide_0141	Marginal lake, east site, Mt. Hope (Tarr)	Greenland	Nuussuaq Peninsula (Upernavik Archipelago)				1896		-56.0062	74.2857		Lanternslide	https://digital.library.cornell.edu/catalog/ss:9417972
9417973	tve_lanternslide_0142	Marginal lake, east site, Mt. Hope (Tarr)	Greenland	Nuussuaq Peninsula (Upernavik Archipelago)	Cornell Glacier			1906		-56.0062	74.2857		Lanternslide	https://digital.library.cornell.edu/catalog/ss:9417973
9417974	tve_lanternslide_0143	Abandoned moraine- north end of Cornell Glacier (Tarr)	Greenland	Nuussuaq Peninsula (Upernavik Archipelago)	Cornell Glacier			1896		-55.9697	74.2259		Lanternslide	https://digital.library.cornell.edu/catalog/ss:9417974
9417975	tve_lanternslide_0144	Marginal drainage between Cornell Glacier and North end of Mt. Hope (Tarr)	Greenland	Nuussuaq Peninsula (Upernavik Archipelago)	Cornell Glacier			1896		-56.0062	74.2857		Lanternslide	https://digital.library.cornell.edu/catalog/ss:9417975
9417976	tve_lanternslide_0145	Marginal drainage between Mt. Hope (Tarr)	Greenland	Nuussuaq Peninsula (Upernavik Archipelago)	Cornell Glacier			1896		-56.0062	74.2857		Lanternslide	https://digital.library.cornell.edu/catalog/ss:9417976
9417977	tve_lanternslide_0146	Nunatak, glacial lake, North Greenland (Libbey)	Greenland					1894 or 1899					Lanternslide	https://digital.library.cornell.edu/catalog/ss:9417977
9417978	tve_lanternslide_0147	Delta in marginal lake, Mt. Hope (Tarr)	Greenland	Nuussuaq Peninsula (Upernavik Archipelago)				1896		-56.0062	74.2857		Lanternslide	https://digital.library.cornell.edu/catalog/ss:9417978
9417979	tve_lanternslide_0148	Delta in marginal lake, back of Nugsuak (Tarr)	Greenland	Nuussuaq Peninsula (Upernavik Archipelago)				1896					Lanternslide	https://digital.library.cornell.edu/catalog/ss:9417979
9417980	tve_lanternslide_0149	Central moraine, Bowdoin Glacier (Libbey)	Greenland	Qaanaaq	Bowdoin Glacier			1894 or 1899		-68.6983	77.6931		Lanternslide	https://digital.library.cornell.edu/catalog/ss:9417980
9417981	tve_lanternslide_0150	Margin of Cornell Glacier back of Mt. Schurman moraine, drainage, etc. (Tarr)	Greenland	Nuussuaq Peninsula (Upernavik Archipelago)	Cornell Glacier			1896		-56.0538	74.3718		Lanternslide	https://digital.library.cornell.edu/catalog/ss:9417981
9417982	tve_lanternslide_0151	Moraine margin, Cornell Glacier	Greenland	Nuussuaq Peninsula (Upernavik Archipelago)	Cornell Glacier					-55.9697	74.2259		Lanternslide	https://digital.library.cornell.edu/catalog/ss:9417982
9417983	tve_lanternslide_0152	Moraine, margin of Cornell Glacier (Tarr)	Greenland	Nuussuaq Peninsula (Upernavik Archipelago)	Cornell Glacier			1896		-55.9697	74.2259		Lanternslide	https://digital.library.cornell.edu/catalog/ss:9417983
9417984	tve_lanternslide_0153	Moraine, margin of Cornell Glacier (Tarr)	Greenland	Nuussuaq Peninsula (Upernavik Archipelago)	Cornell Glacier			1896		-55.9697	74.2259		Lanternslide	https://digital.library.cornell.edu/catalog/ss:9417984
9417985	tve_lanternslide_0154	Moraine, east side of Mt. Schurman ([J.O.] Martin)	Greenland	Nuussuaq Peninsula (Upernavik Archipelago)				1896		-56.0538	74.3718	Two men in picture	Lanternslide	https://digital.library.cornell.edu/catalog/ss:9417985
9417986	tve_lanternslide_0155	Center of Fan Glacier	Greenland	Qaanaaq	Fan Glacier					-69.687	77.563		Lanternslide	https://digital.library.cornell.edu/catalog/ss:9417986
9417987	tve_lanternslide_0156	Robertson Glacier	Greenland		Robertson Glacier								Lanternslide	https://digital.library.cornell.edu/catalog/ss:9417987
9417988	tve_lanternslide_0157	Sea face (250 ft.) of Cornell Glacier ([J.O.] Martin)	Greenland	Nuussuaq Peninsula (Upernavik Archipelago)	Cornell Glacier			1896		-55.9697	74.2259		Lanternslide	https://digital.library.cornell.edu/catalog/ss:9417988
9417989	tve_lanternslide_0158	Drawing of Jakobshavn Glacier, Greenland	Greenland									Illustration|very difficult to read description	Lanternslide	https://digital.library.cornell.edu/catalog/ss:9417989
9417990	tve_lanternslide_0159	Vertical through glacier from terminal end to landbound ice, Greenland	Greenland									Diagram (words in different language)	Lanternslide	https://digital.library.cornell.edu/catalog/ss:9417990
9417991	tve_lanternslide_0160	Tubular icebergs, Antarctic	Antarctica										Lanternslide	https://digital.library.cornell.edu/catalog/ss:9417991
9417992	tve_lanternslide_0161	Iceberg of Labrador coast- old sea benches	Canada					1896					Lanternslide	https://digital.library.cornell.edu/catalog/ss:9417992
9417993	tve_lanternslide_0162	Pack ice, Baffins Bay Greenland (Davis)	Greenland	Baffin Bay				1881		-69.1631	74.4634	Sunset in image	Lanternslide	https://digital.library.cornell.edu/catalog/ss:9417993
9417994	tve_lanternslide_0163	Iceberg of Greenland coast ([J.O.] Martin)	Greenland					1896					Lanternslide	https://digital.library.cornell.edu/catalog/ss:9417994
9417995	tve_lanternslide_0164	Pack ice, Baffins Bay, (Black)	Greenland	Baffin Bay						-69.1631	74.4634		Lanternslide	https://digital.library.cornell.edu/catalog/ss:9417995
9417996	tve_lanternslide_0165	Iceberg recently broken off of Cornell Glacier (Tarr)	Greenland	Nuussuaq Peninsula (Upernavik Archipelago)	Cornell Glacier			1896		-55.9697	74.2259		Lanternslide	https://digital.library.cornell.edu/catalog/ss:9417996
9417997	tve_lanternslide_0166	Iceberg, Baffins Bay (Black/Davis)	Greenland	Baffin Bay				1879		-69.1631	74.4634		Lanternslide	https://digital.library.cornell.edu/catalog/ss:9417997
9417998	tve_lanternslide_0167	Berg on Greenland coast showing recent shattering (Tarr)	Greenland					1896					Lanternslide	https://digital.library.cornell.edu/catalog/ss:9417998
9417999	tve_lanternslide_0168	Iceberg and bits from Cornell Glacier … ([J.O.] Martin)	Greenland	Nuussuaq Peninsula (Upernavik Archipelago)	Cornell Glacier			1896		-55.9697	74.2259	Some of writing unable to be read|boat in picture	Lanternslide	https://digital.library.cornell.edu/catalog/ss:9417999
9418000	tve_lanternslide_0169	Ryder Fjord Lat 74 degrees 10 minutes N, Greenland coast- icebergs	Greenland	Nuussuaq Peninsula (Upernavik Archipelago)									Lanternslide	https://digital.library.cornell.edu/catalog/ss:9418000
9418001	tve_lanternslide_0170	Glacier Bay, Alaska (Haynes)	Alaska	Glacier Bay					USGS Mount Fairweather	-136.09	58.6705		Lanternslide	https://digital.library.cornell.edu/catalog/ss:9418001
9418002	tve_lanternslide_0171	Iceberg on Greenland coast (Tarr)	Greenland					1896					Lanternslide	https://digital.library.cornell.edu/catalog/ss:9418002
9418003	tve_lanternslide_0172	Iceberg in Waigat Strait, Mt. Hope on left (Tarr)	Greenland	Nuussuaq Peninsula (Upernavik Archipelago)				1896		-56.0062	74.2857	Many people in picture	Lanternslide	https://digital.library.cornell.edu/catalog/ss:9418003
9418004	tve_lanternslide_0173	Icebergs in harbor of (Umanak), Greenland (Tarr)	Greenland	Uummannaq Fjord				1896		-52.1272	70.6744	Picture of harbor and buildings in village	Lanternslide	https://digital.library.cornell.edu/catalog/ss:9418004
9418005	tve_lanternslide_0174	Iceberg with large hole through it, N. Greenland	Greenland										Lanternslide	https://digital.library.cornell.edu/catalog/ss:9418005
9418006	tve_lanternslide_0175	Large Greenland iceberg near source, Wilcox Head 74 degrees 10 minutes, Greenland	Greenland	Nuussuaq Peninsula (Upernavik Archipelago)									Lanternslide	https://digital.library.cornell.edu/catalog/ss:9418006
9418007	tve_lanternslide_0176	Iceberg											Lanternslide	https://digital.library.cornell.edu/catalog/ss:9418007
9418008	tve_lanternslide_0177	Bowdoin Glacier (Libbey)	Greenland	Qaanaaq	Bowdoin Glacier			1894 or 1899		-68.6983	77.6931		Lanternslide	https://digital.library.cornell.edu/catalog/ss:9418008
9418009	tve_lanternslide_0178	Bowdoin Glacier (Libbey)	Greenland	Qaanaaq	Bowdoin Glacier			1894 or 1899		-68.6983	77.6931		Lanternslide	https://digital.library.cornell.edu/catalog/ss:9418009
9418010	tve_lanternslide_0179	Bowdoin Glacier, nunatak (Libbey)	Greenland	Qaanaaq	Bowdoin Glacier			1894 or 1899		-68.6983	77.6931		Lanternslide	https://digital.library.cornell.edu/catalog/ss:9418010
9418011	tve_lanternslide_0180	Glacier east of Kaswah(?) Greenland (Libbey)	Greenland					1894 or 1899					Lanternslide	https://digital.library.cornell.edu/catalog/ss:9418011
9418012	tve_lanternslide_0181	Barden Bay, Tyndall Glacier, Greenland (Libbey)	Greenland	Qaanaaq	Tyndall Glacier			1894 or 1899		-70.9623	77.121		Lanternslide	https://digital.library.cornell.edu/catalog/ss:9418012
9418013	tve_lanternslide_0182	Barden Bay, upper settlement, Greenland (Libbey)	Greenland	Qaanaaq				1894 or 1899		-70.9623	77.121		Lanternslide	https://digital.library.cornell.edu/catalog/ss:9418013
9418014	tve_lanternslide_0183	Dying glacier- interior of upper Nugsuak (Tarr)	Greenland	Nuussuaq Peninsula (Upernavik Archipelago)				1896		-56.9146	74.1521		Lanternslide	https://digital.library.cornell.edu/catalog/ss:9418014
9418015	tve_lanternslide_0184	Looped Glacier, interior of upper Nugsuak (Tarr)	Greenland	Nuussuaq Peninsula (Upernavik Archipelago)				1896		-56.9146	74.1521		Lanternslide	https://digital.library.cornell.edu/catalog/ss:9418015
9418016	tve_lanternslide_0185	Sea terminus of Nugsuak Glacier (Tarr)	Greenland	Nuussuaq Peninsula (Upernavik Archipelago)	Nugsuak Glacier			1896		-56.9146	74.1521	Man in picture	Lanternslide	https://digital.library.cornell.edu/catalog/ss:9418016
9418017	tve_lanternslide_0186	Moraine on terminus of Nugsuak Glacier (Tarr)	Greenland	Nuussuaq Peninsula (Upernavik Archipelago)	Nugsuak Glacier			1896		-56.9146	74.1521		Lanternslide	https://digital.library.cornell.edu/catalog/ss:9418017
9418018	tve_lanternslide_0187	Glaciated surface, upper Nugsuak. Camp 2 ([J.O.] Martin)	Greenland	Nuussuaq Peninsula (Upernavik Archipelago)				1896		-56.9146	74.1521		Lanternslide	https://digital.library.cornell.edu/catalog/ss:9418018
9418019	tve_lanternslide_0188	Glaciated surface- Wilcox Head, end of upper Nugsuak (Tarr)	Greenland	Nuussuaq Peninsula (Upernavik Archipelago)				1896		-57.2843	74.1041		Lanternslide	https://digital.library.cornell.edu/catalog/ss:9418019
9418020	tve_lanternslide_0189	Godthab - Moravian Mission (Libbey)	Greenland	Nuuk				1894 or 1899		-52.7698	69.6687	Godthab is now called Nuuk	Lanternslide	https://digital.library.cornell.edu/catalog/ss:9418020
9418021	tve_lanternslide_0190	Greenland coast- near (Unanaeek) fjord	Greenland									Umanak/Uummannaq fjord?	Lanternslide	https://digital.library.cornell.edu/catalog/ss:9418021
9418022	tve_lanternslide_0191	(Nunevak) Greenland, rugged topography ([J.O.] Martin)	Greenland					1896					Lanternslide	https://digital.library.cornell.edu/catalog/ss:9418022
9418023	tve_lanternslide_0192	Glaciated surface base ([J.O.] Martin)	Greenland									Some of writing is unable to be read	Lanternslide	https://digital.library.cornell.edu/catalog/ss:9418023
9418024	tve_lanternslide_0193	Devil's Thumb, glaciated topography, Greenland ([J.O.] Martin)	Greenland	Nuussuaq Peninsula (Upernavik Archipelago)				1896		-56.4598	74.31		Lanternslide	https://digital.library.cornell.edu/catalog/ss:9418024
9418025	tve_lanternslide_0194	Devil's Thumb, glaciated topography ([J.O.] Martin)	Greenland	Nuussuaq Peninsula (Upernavik Archipelago)				1896		-56.4598	74.31		Lanternslide	https://digital.library.cornell.edu/catalog/ss:9418025
9418026	tve_lanternslide_0195	Glaciated surface and the Devil's Thumb ([J.O.] Martin)	Greenland	Nuussuaq Peninsula (Upernavik Archipelago)				1896		-56.4598	74.31		Lanternslide	https://digital.library.cornell.edu/catalog/ss:9418026
9418027	tve_lanternslide_0196	Disko Island from Godhavn ([J.O.] Martin)	Greenland	Uummannaq Fjord				1896		-52.7698	69.6687	Camp in picture	Lanternslide	https://digital.library.cornell.edu/catalog/ss:9418027
9418028	tve_lanternslide_0197	Harbor of God, Disko Island, Greenland ([J.O] Martin)	Greenland	Uummannaq Fjord				1896		-52.7698	69.6687	Boat in picture	Lanternslide	https://digital.library.cornell.edu/catalog/ss:9418028
9418029	tve_lanternslide_0198	Icecap of Disko Island from Godhavn ([J.O.] Martin)	Greenland	Uummannaq Fjord				1896		-52.7698	69.6687	Boat in picture	Lanternslide	https://digital.library.cornell.edu/catalog/ss:9418029
9418030	tve_lanternslide_0199	Dike chasm not reached by glacial erosion (Tarr)						1896				Blurry picture	Lanternslide	https://digital.library.cornell.edu/catalog/ss:9418030
9418031	tve_lanternslide_0200	Glaciated surface, upper Nugsuak, Greenland ([J.O.] Martin)	Greenland	Nuussuaq Peninsula (Upernavik Archipelago)				1896		-56.9146	74.1521	Camp in picture	Lanternslide	https://digital.library.cornell.edu/catalog/ss:9418031
9418032	tve_lanternslide_0201	Glaciated surface, base of upper Nugsuak (Tarr)	Greenland	Nuussuaq Peninsula (Upernavik Archipelago)				1896		-56.9146	74.1521	Crack in glass	Lanternslide	https://digital.library.cornell.edu/catalog/ss:9418032
9418033	tve_lanternslide_0202	Drift stream surface Wilcox Head, Greenland ([J.O.] Martin)	Greenland	Nuussuaq Peninsula (Upernavik Archipelago)				1896		-57.2843	74.1041		Lanternslide	https://digital.library.cornell.edu/catalog/ss:9418033
9418034	tve_lanternslide_0203	Land margin-Greenland, showing vegetation possibilities close to great ice sheets, Waigat Strait, W. coast Greenland	Greenland	Nuussuaq Peninsula (Upernavik Archipelago)						-52.7046	70.0899		Lanternslide	https://digital.library.cornell.edu/catalog/ss:9418034
9418035	tve_lanternslide_0204	Ice in forest, Columbia Glacier E. edge	Alaska	Prince William Sound	Columbia Glacier	23	August	1909	USGS Seward (D1), Anchorage (A1)	-147.077	61.0958		Lanternslide	https://digital.library.cornell.edu/catalog/ss:9418035
9418036	tve_lanternslide_0205	Outwash gravels of Atrevida Glacier, Alaska	Alaska	Yakutat	Atrevida Glacier				USGS Yakutat (D5)	-139.787	59.9709		Lanternslide	https://digital.library.cornell.edu/catalog/ss:9418036
[truncated: 101 more rows]
