# Supplementary material for: Historic photographs of glaciers and glacial landforms from the Ralph Stockman Tarr collection at Cornell University
Source: Copernicus journal article supplement (doi:10.5194/essd-12-771-2020), 2020-04-02
Supplement: Supplementary file 1 [file essd-12-771-2020-supplement.zip]

Archive with 3 entries (3 files):
- tarr_paper_supplemental_v2.pdf
- elliott_pritchard_ts01_v2a.xls
- essd-12-771-2020-supplement-title-page.pdf
