# Supplementary material for: Historic photographs of glaciers and glacial landforms from the Ralph Stockman Tarr collection at Cornell University
Source: Copernicus journal article supplement (doi:10.5194/essd-12-771-2020), 2020-04-02
Supplement: Supplementary file 1 [file essd-12-771-2020-supplement.zip › essd-12-771-2020-supplement-title-page.pdf]

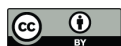

## *Supplement of*

# **Historic photographs of glaciers and glacial landforms from the Ralph Stockman Tarr collection at Cornell University**

**Julie Elliott and Matthew E. Pritchard**

*Correspondence to:* Julie Elliott ([julieelliott@purdue.edu](mailto:julieelliott@purdue.edu))

- [essd-12-771-2020-supplement-title-page.pdf](#)
- [elliott\\_pritchard\\_ts01\\_v2a.xls](#)
- [tarr\\_paper\\_supplemental\\_v2.pdf](#)

The copyright of individual parts of the supplement might differ from the CC BY 4.0 License.
